# Supplementary material for: A super-pangenome framework of the genus Glycine unveils polyploid evolution and life-strategy transition
Source: Research Square preprint supplement (doi:10.21203/rs.3.rs-548382/v1), 2021-05-27
Supplement: Supplementary file 3 [file f24bd393e64c7485ab2a5d96.xlsx]

## Sheet: Supplementary Table 1
Supplementary Table 1. Evaluation and correction of the raw assembled genomes using bacterial artificial chromosome sequences (BESs).
Species	CSIRO Accession #	Unique BESs reads	Correctly mapped	Total No. of gaps in scaffolds*	Gaps without BES info	No. of BESs covered gaps	No. of gaps supported by BESs	No. of gaps corrected by BESs	No. of gaps supported by BESs after correction
Glycine falcata	G1718	14281	14214 (99.53%)	1816	415 (22.85%)	1401 (78.15%)	1311 (93.57%)	79	1390 (99.21%)
Glycine stenophita	G1974	16585	16423 (99.02%)	410	123 (30.00%)	287 (70.00%)	275 (95.82%)	11	286 (99.65%)
Glycine cyrtoloba	G1267	51413	51202 (99.59%)	351	37 (10.54%)	314 (89.46%)	284 (90.45%)	27	311 (99.04%)
Glycine syndetika	G1300	33771	33524 (99.27%)	399	62 (15.54% )	337 (84.46%)	305 (90.50%)	29	334 (99.10%)
Glycine tomentella D3	G1403	30544	30435 (99.64%)	408	98 (24.02%)	310 (75.98%)	300 (96.77%)	7	307 (99.03%)
Glycine dolichocarpa	G1134	93606	93180 (99.54%)	644	113 (17.55%)	531 (82.45%)	496 (93.41%)	31	527 (99.24%)
* Assembled chromosomes

## Sheet: Supplementary Table 2
Supplementary Table 2. Statistics of the six assembled perennial Glycine genomes.
G. dolichocarpa	G. falcata	G. stenophita	G. cyrtoloba	G. syndetika	G. tomentella D3	G. dolichocarpa
Sample ID	G1718	G1974	G1267	G1300	G1403	G1134
Genome group	F	B	C	A	D	AtDt
Total assembly size (bp)	1393386793	941130102	1286555213	948219602	999908507	1952015855
Contigs	2459	643	549	649	696	1040
Contigs (>1000bp)	2326	464	458	544	558	360
Contigs N50	2223660	4028314	6791544	4177887	4662391	48983223
Scaffolded contigs	1836	430	371	419	428	684
Scaffolded length (bp)	1373823526	935566508	1279810275	942906536	992854882	1944779142
Scaffolded length (%)	0.986	0.9941	0.9948	0.9944	0.9929	0.9963
Scaffold N50	71086272	49343246	67604832	49331441	49894626	48983223
Chromosome-scale scaffold number	20	20	20	20	20	40
Chromosome-scale scaffolds length (%)	0.986	0.9941	0.9948	0.9944	0.9929	0.9963
N's per 100 kbp	13.83	4.36	2.73	4.21	4.08	3.3

## Sheet: Supplementary Table 3
Supplementary Table 3. Genome assembly and annotation completeness evaluated by BUSCO.
Species	Complete Single-Copy BUSCOs (%)	Complete and single-copy BUSCO (%)	Complete duplicated BUSCOs (%)	Fragmented BUSCOs (%)	Missing BUSCOs (%)	Total BUSCO groups evaluated
G. falcata	92.9	56.6	36.3	1.3	5.8	1440
G. stenophita	93.6	44.6	49	0.7	5.7	1440
G. cyrtoloba	92.6	56.3	36.3	1.5	5.9	1440
G. syndetika	93.2	46.5	46.7	1.1	5.7	1440
G. tomentella D3	93	48.1	44.9	1.3	5.7	1440
G. dolichocarpa	93.1	15.4	77.7	0.9	6	1440

## Sheet: Supplementary Table 4
Supplementary Table 4. Genome assembly and annotation completeness evaluated by CEGMA.
Species	Prots	Complete completeness (%)	Complete and partial Prots	Completeness (%)
G. falcata	219	88.31	237	95.56
G. stenophita	227	91.53	242	97.58
G. cyrtoloba	223	89.92	240	96.77
G. syndetika	223	89.92	241	97.18
G. tomentella D3	223	89.92	241	97.18
G. dolichocarpa	226	91.13	240	96.77

## Sheet: Supplementary Table 5
Supplementary Table 5. Numbers of annotated genes and TE content in the assembled perennial genomes.
	G. falcata	G. stenophita	G. cyrtoloba	G. syndetika	G. tomentella D3	G. dolichocarpa
Genomes	F	B	C	A	D	At	Dt	At+Dt
Genes	58312	55844	56496	55376	56862	56218	57479	113697
Ty1/copia	6851	4187	6207	4804	3490	4408	2701	7109
	0.1773	0.1116	0.1286	0.1379	0.1482	0.1336	0.179256	0.1574
Ty3/gypsy	12360	6738	13326	8015	5841	8824	5408	14232
	0.3218	0.204	0.3321	0.1942	0.2124	0.233849	0.235289	0.2346
LINE	1806	1421	1620	1671	1594	2011	1135	3146
	0.0064	0.0013	0.0027	0.0005	0.0013	0.00267063	0.00138415	0.002
SINE	1426	470	912	238	601	401	442	843
	0.0012	0.0003	0.0005	0.0003	0.0004	0.000298105	0.00030174	0.0003
Tc1/Mariner	152	183	69	156	74	131	155	286
	0.0001	0.0003	0.0004	0.0007	0.0002	0.00120342	0.000237703	0.0007
hAT	113	306	316	310	198	318	234	552
	0.0003	0.0046	0.0013	0.0014	0.0002	0.000576087	0.00138928	0.001
Mutator	332	3159	334	1818	1760	268	243	511
	0.0401	0.0436	0.0024	0.0314	0.0123	0.0192822	0.0160552	0.0176
PIF/Harbinger	132	75	79	68	101	74	114	188
	0.0004	0.0003	0.0004	0.0003	0.0004	0.000411126	0.000581613	0.0005
Pong	81	179	59	100	95	114	98	212
	0.0002	0.0003	0.0006	0.0004	0.0008	0.000561655	0.000443382	0.0005
CACTA	623	283	541	336	340	340	406	746
	0.0052	0.0039	0.0076	0.0045	0.0045	0.00399871	0.00438484	0.0042
Helitron	1081	1255	1877	1337	1317	1332	1347	2679
	0.06514	0.0327	0.0321	0.0314	0.0304	0.0285624	0.0265244	0.023
TE content in each genome	0.61814	0.4029	0.5087	0.403	0.4111	0.425014	0.465847	0.4418

## Sheet: Supplementary Table 6
Supplementary Table 6. Genomic rearrangements identified in the sequenced Glycine species using common bean as a reference.
Chr_ID	Starting_position	Ending_position	Chr_ID	Starting_position	Ending_position	Chr_ID	Starting_position	Ending_position	Chr_ID	Starting_position	Ending_position	Chr_ID	Starting_position	Ending_position	Chr_ID	Starting_position	Ending_position	Chr_ID	Starting_position	Ending_position	Annotation
Pv01	31237	419541	Gm14	48911098	48442357	Fa14	70333265	69900200	St14	49303988	48834923	Cy14	72363374	71898117	Sy14	52086159	51596639	To20	33430	464069	Translocation/insertin in G. tome
Pv01	149985	6715	Gm17	41487622	41593452	Fa17	62214389	62349762	St17	38150583	38272372	Cy17	51381750	51484531	Sy17	35498796	35597026	To17	43090891	42989778	INV in G. max, G. sten, G. cyrt, G. synd
Pv01	359879	37775	Gm14	48492539	48884779	Fa14	69943730	70310041	St14	48891625	49284353	Cy14	71945102	72337193	Sy14	51652018	52052149	To20	414655	62044	INV in G. max, G. falc, G. sten, G. cyrt, G. synd
Pv01	4966056	4981168	Gm17	36328551	36142936	Fa17	53881738	53641882	St17	32169940	32027155	Cy17	43279809	29254149	Sy17	28942898	43001782	To17	36872087	36706766	TD in G. sten
Pv01	4972376	5026077	Gm17	36125880	35870722	Fa17	53639371	53618893	St17	32024571	31985573	Cy17	43001782	28942898	Sy17	28910982	42864187	To17	36700442	36649402	TD in G. max
Pv01	5456382	5383378	Gm17	35122156	35162076	Fa17	53112530	53304552	St14	14620326	31801388	Cy17	42284797	28588741	Sy17	28703251	42576013	To17	36363611	36445178	TD in G. falc
Pv01	8703326	7864584	Gm13	10705589	11638646	Fa7	28925550	6802178	St7	26166758	28310767	Cy7	15380566	38866319	Sy7	24453518	22177989	To7	40594943	37899122	INV in G. max, G. sten, G. cyrt
Pv01	19568490	17765323	Gm16	4383851	5733348	Fa19	9151321	7405075	St19	4881698	6295040	Cy15	15059040	16347755	Sy19	4784760	6159766	To4	40176090	38872507	INV in G .falc, G. tome
Pv01	20905581	25625989	Gm03	377626	751612	Fa3	344028	741554	St3	306077	658768	Cy8	54646910	54344303	Sy3	351715	733513	To3	326628	703415	INV in G. cyrt
Pv01	26156693	20018800	Gm16	3385842	4066000	Fa19	3794626	4551375	St19	3813156	4572767	Cy15	13998554	14752627	Sy19	3744306	4446789	To4	41169961	40450942	INV in G. max, G. falc, G. sten, G. cyrt, G. synd
Pv01	31229924	3971463	Gm11	8869004	8879691	Fa11	10354531	10424208	St11	9764584	9776444	Cy11	9889195	9770953	Sy11	9777987	9895870	To11	9666724	9677251	TD in G. falc
Pv01	38528656	38677429	Gm03	36032571	36055008	Fa3	55596052	55629975	St3	28354156	28377239	Cy3	54755145	33953916	Sy3	33982070	54774586	To3	39129138	39193432	TD in G. tome
Pv01	48254197	48306137	Gm11	30744999	30825823	Fa11	53356297	53519527	St11	33114087	33308526	Cy11	42947853	34663720	Sy11	33483680	43659962	To11	38122917	38226414	TD in G. sten
Pv01	49160272	49171643	Gm18	2550811	2504003	Fa18	81730516	81707616	St18	2906113	2883467	Cy7	60121121	2925282	Sy7	2900876	60155154	To2	9397252	9371594	TD in G. max
Pv01	49827144	48908577	Gm18	1744303	2748165	Fa18	80841853	81969206	St18	2015527	3123504	Cy7	61139658	59886413	Sy18	2018807	3102198	To2	8556142	9585308	INV in G. max, G. falc, G. sten, G. synd, G. tome
Pv01	50013282	49837364	Gm18	1538105	1733440	Fa18	82218476	82022484	St18	1799969	2014835	Cy7	63174062	61166970	Sy18	1780710	2000230	To2	8336297	8550578	INV in G. max, G. sten, G. synd
Pv01	50573390	50211945	Gm18	880155	1287658	Fa18	82966200	82444876	St18	1011701	1491906	Cy7	62377813	62860087	Sy18	1043356	1491834	To10	45579974	45114010	INV in G. max, G. falc, G. sten, G. cyrt, G. synd
Pv01	50990522	51332430	Gm11	34309634	34624252	Fa11	58939049	59284377	St11	37197528	37581174	Cy12	14016277	7389483	Sy11	39239709	39594154	To11	42218289	42600779	INV in G. cyrt
Pv01	51145201	50774775	Gm18	255545	671598	Fa18	83640892	83202185	St18	332490	792089	Cy7	61743060	61864155	Sy18	390025	814655	To10	46226984	45817802	INV in G. max, G. sten, G. synd
Pv02	1921585	1848207	Gm01	52250433	52326348	Fa1	78053557	78102230	St1	49316138	49398126	Cy1	72783587	72861555	Sy1	14086139	52296520	To1	56894585	56968347	INV in G. max, G. Sten, G. cyrt, G. synd, G. tome
Pv02	2990128	2892593	Gm01	51157055	51350181	Fa1	76810166	76906338	St1	48153444	48261753	Cy1	71484999	71590792	Sy1	51088597	51167220	To1	55911339	55971738	INV in G. falc, G. sten, G. cyrt, G. synd，G. tome
Pv02	8377554	14892876	Gm01	4420529	4925287	Fa1	6487544	7597633	St1	5594158	6140700	Cy18	71293177	70306436	Sy1	6370582	7037741	To1	5820282	6629466	INV in G. falc, G. sten, G. synd, G. tome
Pv02	10674500	29754087	Gm02	3098851	3913236	Fa8	65517622	64559125	St8	42037417	42992321	Cy14	77468098	78422467	Sy8	52667065	53694595	To10	2213816	1313861	INV in G. max, G. sten, G. cyrt, G. synd
Pv02	10993859	10940155	Gm01	3564064	3539383	Fa1	5269141	5250803	St1	4616704	4196617	Cy18	72789390	5266412	Sy18	4434899	72829206	To1	4770373	4991980	TD in G. sten
Pv02	11722328	11749498	Gm02	2639567	2489367	Fa8	63103448	63046969	St8	41523651	41495056	Cy14	76971434	52203995	Sy14	52154880	76938667	To10	2693858	2752089	TD in G. max
Pv02	14508021	12905786	Gm02	10019490	11199017	Fa8	62035957	60947817	St8	40512918	39358536	Cy14	76052073	74957898	Sy8	50322882	49860120	To10	3742013	4865539	INV in G. max, G. tome
Pv02	14770806	11935492	Gm02	1658179	2425620	Fa8	62082719	62970545	St8	40553718	41385732	Cy14	76092390	76861460	Sy8	50358997	52080289	To10	3707144	2832945	INV in G. max, G. falc, G. sten, G. cyrt, G. synd
Pv02	17137125	32797130	Gm20	1214020	5260112	Fa13	32775268	28705482	St13	20101466	16956846	Cy13	37113847	32942542	Sy13	21037070	18069303	To13	22022872	18691692	INV in G. falc, G. sten, G. cyrt, G. synd，G. tome
Pv02	17490820	32658533	Gm07	39135712	40698177	Fa2	19473662	25545054	St2	19417686	15900868	Cy2	34050922	17801695	Sy2	15690521	12762238	To2	42765189	44260313	INV in G. falc, G. sten
Pv02	24974745	24581695	Gm01	49635856	49853271	Fa1	74544240	74758646	St1	45066239	45322313	Cy1	69139185	69363712	Sy1	48928249	48702013	To1	52932093	53127558	INV in G. max, G. falc, G. sten, G. cyrt, G. tome
Pv02	27634530	12336732	Gm01	937652	4243315	Fa1	1939301	6242767	St1	974903	5355790	Cy18	76883929	71565518	Sy1	870559	6100925	To1	914616	5554049	INV in G. cyrt
Pv02	29724644	28192135	Gm09	42343396	43225630	Fa9	56723379	55666003	St9	37452606	38404839	Cy9	62046730	63058279	Sy9	38362105	39321504	To15	7829973	6857983	INV in G. max, G. sten, G. cyrt, G. synd
Pv02	33632544	33286454	Gm05	33796207	34002776	Fa2	32863531	32658771	St2	28817360	28599984	Cy2	25432129	25719664	Sy2	23348346	23583867	To18	9893992	9704789	INV in G. max, G. cyrt, G. synd
Pv02	37666977	37870482	Gm13	13768892	13555877	Fa2	30527358	30401486	St2	24778626	24587632	Cy15	6141661	30170424	Sy2	20601206	20435564	To18	12522317	12657891	Translocation/insertin in G. max
Pv02	40222564	40194712	Gm07	36696099	36650373	Fa2	28359894	28442705	St2	22362426	22406166	Cy2	32040232	18521192	Sy2	18561840	32005918	To18	14434642	14401930	TD in G. falc
Pv02	42852012	44131328	Gm08	10368757	11251957	Fa7	71161403	72435638	St7	11990139	13030671	Cy12	5627827	4596335	Sy8	11951792	12945397	To8	24751816	23798520	INV in G. cyrt
Pv02	43467205	46220761	Gm05	36987329	39341188	Fa2	38871002	41568447	St2	30977193	33663491	Cy19	37760902	34209157	Sy2	26866523	29489984	To18	6489006	3778901	INV in G. cyrt, G. tome
Pv02	44987241	41217591	Gm08	536194	9071774	Fa7	59118507	69295918	St7	610705	10471830	Cy15	574542	10317762	Sy8	623373	10401509	To8	35545807	26236864	INV in G.tome
Pv02	46576166	49505724	Gm05	39635035	42036009	Fa2	36382518	42401406	St2	33978148	37008440	Cy2	34535337	37197212	Sy2	29786000	32658524	To18	3455609	582897	INV in G. falc, G. tome
Pv02	49393324	49229755	Gm08	4076957	4132335	Fa7	63358655	63425170	St2	36872467	36829614	Cy15	4541216	4607743	Sy8	4663043	4684648	To8	31597165	31548277	Translocation/insertin in G. max
Pv02	49408046	49239509	Gm05	41899837	4070580	Fa2	42253172	63352223	St7	4731279	4670154	Cy2	37028476	4536190	Sy8	32499655	4619845	To18	738727	31613968	Translocation/insertin in G. max
Pv03	563809	1480217	Gm20	2658	1065810	Fa8	70196900	69040689	St8	48811249	47556776	Cy14	83805646	82737007	Sy8	59560713	58328922	To8	47344	4998279	INV in G. falc, G. sten, G. cyrt, G. synd，G. tome
Pv03	2135327	3210634	Gm09	28731562	23603130	Fa9	36601342	38865152	St19	36513201	34250184	Cy9	43480729	21568035	Sy19	26778075	26189037	To9	32021955	17195600	Translocation/insertin in G. max
Pv03	2901124	2465634	Gm02	8768250	9655022	Fa8	58462106	59060163	St8	8050688	8720234	Cy8	51247603	51808527	Sy8	47540517	48135396	To10	7114482	6529577	INV in G. max, G. falc, G. sten, G. cyrt, G. synd
Pv03	3276598	4875207	Gm02	12437119	11381371	Fa8	59901498	60729812	St8	35217985	34377128	Cy8	52490589	74793110	Sy8	48855113	49677600	To10	5810514	5031518	Translocation/insertin in G. max
Pv03	4826756	4852607	Gm02	11677001	11416560	Fa8	60681123	60700502	St8	34442169	34427061	Cy14	74757323	49600121	Sy13	49618871	20916574	To10	5103902	5087708	TD in G. max
Pv03	4948610	3285822	Gm02	11291739	12443590	Fa8	60799138	59908504	St8	39219086	35227113	Cy14	74853594	52498153	Sy8	49779395	48848069	To10	4942522	5817416	INV in G. max, G. tome
Pv03	5210886	2408562	Gm02	12976382	13489647	Fa8	59547211	59126998	St8	9175835	8783888	Cy8	52211962	51865018	Sy8	48564383	48199218	To10	6109252	6469220	INV in G. max, G. tome
Pv03	7992831	53168299	Gm02	14501287	13900034	Fa13	34184198	33530848	St13	34404829	33852295	Cy13	38722246	38060989	Sy13	22333578	21726164	To13	23338487	22750687	Translocation/insertin in G. max
Pv03	8973100	9006182	Gm18	22633333	22699215	Fa18	40079071	40121589	St18	20879801	21172323	Cy1	30532776	20419408	Sy1	20470137	30608594	To19	10809446	10918738	TD in G. tome
Pv03	13119615	12463593	Gm17	938469	1120454	Fa17	1174067	861342	St17	1013902	1243817	Cy17	872348	1077005	Sy17	1082095	1287072	To17	991341	1206696	INV in G. falc
Pv03	30045356	30856141	Gm17	2709179	3119656	Fa17	3359556	2936344	St17	3097398	3540778	Cy17	2875546	3286423	Sy17	3237392	3650698	To17	2973927	3399509	INV in G. falc
Pv03	30194015	30590753	Gm07	41366921	41543592	Fa5	71071450	70877864	St5	44599259	44414761	Cy5	61345326	61113894	Sy5	39761994	39564815	To5	46722706	46510323	INV in G. falc, G. sten, G. cyrt, G. synd, G. tome
Pv03	30984694	30849793	Gm13	23076306	23098825	Fa5	70654171	70673597	St5	44166066	44183072	Cy5	60879989	39330254	Sy5	39361261	60898083	To5	46248218	46320253	TD in G. tome
Pv03	34137920	33980037	Gm17	4429106	4514474	Fa17	4747273	4830255	St17	5005025	5099478	Cy17	4746719	4831191	Sy17	5193941	5108568	To17	4906893	4817797	INV in G. synd, G. tome
Pv03	36733938	37375205	Gm02	39269395	38741181	Fa5	67703106	66930177	St5	41005134	40397288	Cy5	57911333	57198702	Sy5	36580752	35870896	To5	43097297	42535376	Translocation/insertin in G. falc, G. sten, G. cyrt, G. synd, G. tome
Pv03	36750698	37405196	Gm02	39260119	27030891	Fa5	67669926	66281210	St5	40984784	40383355	Cy5	57887606	16817043	Sy5	36563263	35866060	To5	43079922	42521538	Translocation/insertin in G. max
Pv03	37414525	38745409	Gm13	27037439	27373819	Fa5	66297341	65448472	St5	40372565	39196228	Cy5	57136444	55908931	Sy5	35853423	32858442	To5	42502640	41296800	INV in G. max, G. falc
Pv03	38522179	38227583	Gm13	28093807	28268213	Fa5	65181867	64880844	St5	38973949	38724167	Cy5	55580588	55294279	Sy5	33086262	33383784	To5	41102466	40799582	INV in G. max, G. synd
Pv03	43121496	40178389	Gm17	6526015	9804711	Fa17	11237475	7379346	St17	11406376	7531324	Cy17	11110270	7343860	Sy17	11289910	7559745	To17	10866376	7221740	INV in G. max
Pv03	45650813	46080236	Gm05	6629317	7479534	Fa5	7743542	8446503	St5	7762764	8606807	Cy5	24877011	23227118	Sy5	7749473	8423580	To5	7123344	7913923	INV in G. cyrt
Pv03	46467718	46534022	Gm05	29155965	29120389	Fa5	9518765	9541090	St5	9541037	9750084	Cy5	21794388	9154349	Sy5	9113909	21677706	To5	8826752	9183203	TD in G. tome
Pv03	46955549	46977815	Gm17	14135127	14153289	Fa17	16169924	16366945	St17	15997012	16016521	Cy17	16040934	15715488	Sy17	15750789	16089937	To17	15359341	15400929	TD in G. falc
Pv03	49081488	48582349	Gm02	5282723	5670471	Fa8	67252305	66834995	St8	44674407	45056642	Cy14	80052005	80454832	Sy8	55273369	55683937	To2	2154991	2559694	INV in G. max, G. sten, G. cyrt, G. synd, G. tome
Pv03	49434040	49467405	Gm16	29448621	29253429	Fa16	68153644	68074621	St16	40981624	40899104	Cy16	65949687	39876070	Sy16	39675555	65438505	To16	46091190	45901252	TD in G. max
Pv03	50679410	49821651	Gm02	3951873	4684591	Fa8	64520500	63537698	St8	43024219	43965775	Cy14	78426176	79391857	Sy8	53725090	54634831	To10	1257535	469290	INV in G. max, G. sten, G. cyrt, G. synd
Pv03	50976750	50954070	Gm16	25431792	25116073	Fa16	60287433	60024261	St16	33366100	33225223	Cy16	58384220	33646380	Sy16	33889538	58027632	To16	40666575	40092950	TD in G. max
Pv03	52114483	6959456	Gm16	14510955	13618648	Fa16	39574355	40729491	St16	26417784	18375913	Cy16	40062190	37303614	Sy3	18670898	47250553	To16	25898951	17687369	TD in G. falc
Pv03	53226206	5800833	Gm02	13823369	9890495	Fa13	33455990	32986540	St13	20781167	20297231	Cy13	37930404	37370999	Sy13	21657337	21246287	To13	22688207	21781686	Translocation/insertin in G. max
Pv03	53410682	52977013	Gm07	37640045	38442086	Fa2	27173247	26111827	St2	21511824	20396024	Cy2	32902067	33515906	Sy2	17489954	16596679	To2	41167799	42029664	INV in G. max, G. sten, G. cyrt, G. tome
Pv04	120016	1939203	Gm19	163476	545561	Fa8	4522718	4138041	St8	184394	588293	Cy20	15999811	16848540	Sy7	200116	618527	To7	52956754	14485734	INV in G. sten
Pv04	1609805	2145007	Gm13	28298272	28440865	Fa5	64843021	64525707	St5	38660281	38425397	Cy5	55180354	54770470	Sy5	33426680	33695376	To5	40751873	40483414	INV in G. falc, G. sten, G. cyrt, G. tome
Pv04	1982817	69855	Gm19	590763	53792	Fa7	73860417	62112334	St8	629738	63112	Cy20	16936689	8711796	Sy7	679257	56499	To7	14532506	53094914	Translocation/insertin in G. Sten
Pv04	2140269	37405196	Gm13	28436396	27030891	Fa5	64520227	66281210	St5	38420144	40383355	Cy5	54766063	16817043	Sy5	33700895	35866060	To5	40478704	42521538	Translocation/insertin in G. falc, G. sten, G. cyrt, G. synd，G. tome
Pv04	2987756	5297728	Gm19	2170639	5139297	Fa7	31929711	36343744	St7	48261439	45624757	Cy7	58522126	54461010	Sy7	2155933	4466353	To7	16056315	19620119	INV in G. sten, G. cyrt
Pv04	9675660	9731866	Gm19	7855973	7488168	Fa7	41363931	41487356	St7	43005686	43072043	Cy7	48826353	6557382	Sy7	7244667	48438184	To7	22150500	22089436	TD in G. max
Pv04	9966282	8795375	Gm13	13814004	14168334	Fa5	23868297	37825202	St5	29761036	31153475	Cy5	28849479	26347509	Sy5	16168730	26196893	To5	28746782	27287330	INV in G.max,.G. falc, G. synd
Pv04	11354544	19283367	Gm02	5716960	6366299	Fa8	66804393	66069611	St8	45150638	45927029	Cy14	80553951	81276007	Sy8	55767286	56548662	To2	2661335	3383067	INV in G. max, G. sten, G. cyrt, G. synd, G. tome
Pv04	13021706	13190186	Gm17	23531754	23192347	Fa17	26890646	27111440	St17	21200759	21039857	Cy17	28317260	13813646	Sy17	18498645	28544948	To17	18399072	18592031	TD in G. max
Pv04	14419066	14522130	Gm16	31874694	31952411	Fa16	71583522	71623443	St16	43832369	43976033	Cy16	69330116	42773883	Sy16	42862278	69530711	To16	50101397	50582383	TD in G. tome
Pv04	37577691	35340113	Gm09	32759415	32508188	Fa9	45603651	43680425	St9	28506753	28126875	Cy9	48626733	29642365	Sy9	29492812	48378185	To9	35593173	35258813	TD in G. max
Pv04	40621977	40491179	Gm09	35367130	34929785	Fa9	48249813	48334312	St9	30438911	30370460	Cy9	51511006	31520167	Sy9	31429456	51335384	To9	37924076	37855952	TD in G. max
Pv04	43625569	43917975	Gm16	36959125	37144846	Fa16	77547123	77354460	St16	50087206	50483040	Cy16	75432068	75809792	Sy16	48222872	48635044	To16	58705594	58416837	INV in G. falc, G. tome
Pv04	48026935	47359911	Gm01	221661	917161	Fa1	1157692	1897426	St1	63406	895591	Cy18	77620180	76923237	Sy1	58519	822933	To1	124398	872637	INV in G. max, G. falc, G. sten, G. synd, G. tome
Pv05	130042	139887	Gm04	52218768	52358762	Fa4	71895997	25164766	St4	39736688	39744958	Cy4	54459351	54473670	Sy4	48271556	48272092	To4	168032	166800	INV in G. falc, G. sten, G. cyrt, G. synd
Pv05	2831288	2737512	Gm11	12179963	12473112	Fa11	23511692	14612549	St11	24316630	26574771	Cy11	21263895	20207777	Sy11	18395816	17809827	To11	19962421	19286588	INV in G. max, G. falc
Pv05	4969640	5387079	Gm15	49930318	49824883	Fa15	68277747	67968405	St15	49206610	48965543	Cy15	80398077	50029378	Sy15	49912228	80166864	To15	53466214	53339119	TD in G. max
Pv05	6369465	8698435	Gm15	47665559	47454934	Fa15	64156109	64042628	St15	46520922	46318600	Cy15	65134925	47776529	Sy15	47493411	63286576	To15	50852816	50567313	TD in G. Ssen
Pv05	7646162	7690715	Gm08	13632907	13602784	Fa8	3324815	3314085	St8	2992162	2961322	Cy12	2095524	15389657	Sy12	15372811	2104802	To8	21265974	21276272	TD in G. max
Pv05	21283169	39522103	Gm15	23079	1264560	Fa14	27150689	1923275	St15	9297	1445989	Cy2	10591	1484494	Sy15	39424	1461778	To15	56485581	55082445	INV in G. tome
Pv05	36534444	36337601	Gm12	34187891	34364097	Fa12	53005477	52847993	St12	33988256	34161525	Cy12	15005165	14815762	Sy13	33718731	35671065	To12	38186059	38376539	INV in G. max, G. falc, G. cyrt, G. tome
Pv05	37523092	37737655	Gm12	32818930	33046083	Fa12	50799295	50183150	St12	32564235	32358313	Cy12	51521943	51192939	Sy12	32386572	32131788	To12	37132046	36866702	INV in G. max
Pv06	2579901	2984348	Gm20	22376377	20460316	Fa13	1689657	2531222	St13	2876771	3764829	Cy13	5602086	2723523	Sy13	4086438	6485633	To13	3533619	4179095	TD in G. max
Pv06	5595143	3726056	Gm13	5232344	2847284	Fa2	8193001	1045490	St2	6177360	4027507	Cy19	6857550	3624626	Sy13	11576892	11666285	To18	41283041	41649084	TD in G. max
Pv06	6506750	11838799	Gm20	7147929	5612083	Fa13	27723452	28554715	St13	16292370	16799891	Cy13	31558664	6391620	Sy13	17877010	32643662	To13	17498881	18451458	TD in G. max
Pv06	9189251	13070251	Gm18	13060060	11551882	Fa18	18927277	19086375	St18	12701697	11564024	Cy18	15230943	12416409	Sy18	11048483	11903541	To2	17364493	16524942	TD in G. falc
Pv06	10570781	10461008	Gm18	13963086	13672111	Fa18	21957514	21719887	St18	13541286	13485207	Cy18	16687563	13321676	Sy18	13239728	16180615	To2	17756240	17684925	TD in G. max
Pv06	14944818	14822646	Gm08	43749007	43684827	Fa8	51570021	51548332	St8	32911118	32891941	Cy8	44443141	41936496	Sy8	41908696	44409886	To10	12995715	13042228	TD in G. max
Pv06	14998120	15014129	Gm18	9620654	9410895	Fa18	13482557	13435207	St18	9465850	9435410	Cy18	7887575	9160343	Sy18	9131933	7843965	To2	15113167	15102115	TD in G. max
Pv06	17158467	17203550	Gm18	6605069	6425582	Fa18	77009600	77041852	St18	6827916	6738847	Cy18	3938969	6813025	Sy18	6767115	3672217	To2	12984528	12954581	TD in G. max
Pv06	17446326	17075862	Gm08	45115194	45310845	Fa8	53931281	53658686	St8	35916656	35597199	Cy8	46717514	46401847	Sy8	43787792	43566010	To10	11186209	11381597	INV in G. max, G. tome
Pv06	18306525	18370596	Gm11	17274288	16494364	Fa11	19654782	19346617	St11	27837144	28029386	Cy11	34595567	28202637	Sy11	28349000	34896169	To11	32181376	32306925	TD in G. max
Pv06	18854734	18370596	Gm11	14843377	16494364	Fa11	51235348	19346617	St11	29560772	28029386	Cy11	36718126	34898819	Sy11	30694364	28344307	To11	33948750	32306925	INV in G. max, G. falc
Pv06	20056908	22324422	Gm03	43506308	45295657	Fa3	64232445	66195158	St3	36401537	38358656	Cy1	2791033	631871	Sy3	42254732	44237006	To3	47277976	49340568	INV in G. cyrt
Pv06	22493499	22532936	Gm09	3076701	3049640	Fa9	3484741	3435099	St9	3490947	3428960	Cy9	3749615	3332465	Sy9	3308199	3707387	To9	4028346	3998389	TD in G. sten
Pv06	22578637	22514515	Gm15	11525771	11610212	Fa15	13379846	13547417	St15	13281087	13369779	Cy2	6706205	6421451	Sy15	14167835	14021635	To15	15271586	15197906	INV in G. max, G. falc, G. sten
Pv06	22700726	22773910	Gm15	11366655	11337337	Fa15	13249111	13209519	St15	13124743	13091798	Cy2	6881006	13033719	Sy2	12993087	6921723	To15	15425427	15631842	TD in G. tome
Pv06	27918678	28336524	Gm13	34220012	34568653	Fa13	40184835	40538140	St13	21371051	21004889	Cy13	45484607	45862920	Sy13	28257583	28629507	To13	29262374	29631338	INV in G. sten
Pv07	177825	524183	Gm02	233013	343894	Fa20	296135	431500	St20	286551	424149	Cy20	302721	435559	Sy20	261291	408262	To19	5561648	5392588	INV in G. tome
Pv07	950827	905236	Gm10	8567994	8137776	Fa10	11397241	11389654	St10	9345895	9261692	Cy10	10268396	8188126	Sy10	8143844	10104042	To10	20370569	20265252	TD in G. max
Pv07	1479665	1559460	Gm09	18843800	19217929	Fa9	26818650	26344954	St9	16759213	16383882	Cy9	27422384	25986877	Sy9	17186776	16555438	To9	15330381	14663747	INV in G. max
Pv07	3127197	3626805	Gm02	17305610	7663932	Fa20	42701834	28346776	St20	37871159	29336674	Cy20	38098218	33980864	Sy20	21921306	39073103	To2	36901379	16841879	Translocation/insertin in G. max
Pv07	3482070	3092017	Gm02	16957210	17459197	Fa20	43450419	42574432	St20	26294065	25667828	Cy20	36889111	37877458	Sy20	19820945	21148779	To2	37456264	36849236	Translocation/insertin in G. max
Pv07	4308288	3720637	Gm10	30660810	25366678	Fa10	31606534	9171441	St10	24689483	19761841	Cy10	32275335	23202133	Sy10	22143148	40566062	To10	40234632	32011828	TD in G. sten
Pv07	8408785	9017443	Gm13	23499663	23923832	Fa20	4032146	4576130	St20	3894205	4435845	Cy20	2941271	2486305	Sy20	3687921	4218258	To20	51644600	52116892	INV in G. max, G. falc, G. sten, G. synd, G. tome
Pv07	9319162	9351557	Gm10	39612743	39582923	Fa10	41482550	41464538	St10	33946181	33938338	Cy10	41820731	33496695	Sy10	33434166	41783489	To7	12768091	12787214	TD in G. sten
Pv07	10025677	23122874	Gm10	38880547	40545783	Fa10	40576311	42538082	St10	33060883	34950935	Cy10	40949592	42841166	Sy10	32565001	34517147	To7	13547440	11923477	INV in G. tome
Pv07	10326625	11065890	Gm02	14635999	15124151	Fa20	3621102	2986566	St20	3530527	3030506	Cy20	3310648	3863994	Sy20	3334689	2856184	To20	51303403	50788108	INV in G. max. G. cyrt
Pv07	11595201	27226613	Gm02	15481048	15858061	Fa20	2519558	2050394	St20	2575107	2125195	Cy20	4267320	1947571	Sy20	2444064	1986336	To20	50371091	49975566	INV in G. max
Pv07	22259701	22549098	Gm20	19066367	20117237	Fa13	4513130	47346560	St3	5033240	3870867	Cy13	6683552	9406783	Sy13	11186477	4441291	To13	5525966	5057390	INV in G. max
Pv07	26794133	25918280	Gm10	4550343	42160321	Fa10	5834814	44640801	St10	5390076	36989369	Cy10	5439000	36662984	Sy10	36351542	44816333	To2	6264447	9838068	TD in G. sten
Pv07	34744758	34404574	Gm20	38775772	39083139	Fa20	67189928	67317342	St20	43842973	43473157	Cy20	51707461	52050288	Sy20	46674561	47033372	To20	43416873	43744563	INV in G. falc, G. sten
Pv07	36476997	36476193	Gm10	48457962	48450101	Fa10	51941237	51938284	St10	44179354	44171710	Cy10	51860381	43739754	Sy10	43716222	51838282	To7	3299236	3317525	TD in G. sten
Pv07	38473255	38370827	Gm20	35274295	35400722	Fa20	57638520	57837768	St20	39267636	39388390	Cy20	49754702	49924421	Sy20	42707322	42845015	To20	39342490	39486369	INV in G. max
Pv08	825310	1413017	Gm02	7980214	8744368	Fa8	57806049	58445846	St8	39183108	8020993	Cy8	50592507	51220925	Sy8	46951486	47496967	To10	7726257	7153523	INV in G. tome
Pv08	4486306	9075631	Gm09	46859691	49537659	Fa9	61759330	64686483	St9	41851031	45017684	Cy9	66580857	69644263	Sy9	42825039	46317569	To15	3518200	739493	INV in G. tome
Pv08	6339674	51827	Gm18	51733003	57992117	Fa18	11805295	551844	St18	44651284	52468660	Cy18	80767139	88056372	Sy18	42760666	50224489	To18	17814642	53500185	INV in G. max, G. sten, G. cyrt, G. synd, G. tome
Pv08	6905091	6869240	Gm18	51307307	51350450	Fa18	10215835	10368252	St18	44095432	44196467	Cy18	80206887	41693472	Sy18	41876784	80415032	To18	17134278	17266845	TD in G. cyrt
Pv08	7423795	7416799	Gm18	50714270	50737943	Fa18	9258967	9460022	St18	43402256	43427465	Cy18	79688272	41052331	Sy18	41074591	79712528	To18	16596538	16618635	TD in G. falc
Pv08	7898197	8244402	Gm18	49960776	50222679	Fa18	75829600	75493289	St18	42788726	42451889	Cy18	79177370	78894475	Sy18	40509220	40171136	To18	16013263	15702025	INV in G. falc, G. sten, G. cyrt, G. synd, G. tome
Pv08	13661070	13826946	Gm18	45118519	44833537	Fa18	68928917	68529588	St18	37598883	36839749	Cy1	9188324	34955286	Sy1	34651551	9981550	To18	29000180	29257554	TD in G. sten
Pv08	14325565	14467040	Gm18	44566780	44562875	Fa18	67985959	67977212	St18	3237923	36495062	Cy1	10217221	34234224	Sy1	34292648	10240822	To18	30045006	30102547	TD in G. tome
Pv08	17191117	16008281	Gm08	46926771	47102594	Fa8	56467188	56669844	St8	38116752	37951063	Cy8	49451381	49213662	Sy8	45934712	45725088	To18	32586288	9058088	INV in G. max, G. falc, G. tome
Pv08	35354455	18276392	Gm16	6065823	5913536	Fa19	47196921	7146626	St19	6616566	6476421	Cy15	16743095	6549902	Sy15	6331935	16469741	To4	38439711	38703386	TD in G. sten
Pv08	44109960	46224699	Gm14	32376200	32699255	Fa14	58385095	58138682	St14	29334547	29709914	Cy14	57885738	41321949	Sy14	40794709	41518499	To14	46902936	46440356	TD in G. sten
Pv08	46211416	46124340	Gm14	32694230	32892502	Fa14	58134248	57667254	St14	29704994	29893913	Cy7	13897403	41164660	Sy14	40794709	40584540	To14	46434237	46052247	INV in G. max
Pv08	47831781	48974022	Gm13	19951584	20376851	Fa7	45665598	46337292	St7	23372409	22809720	Cy7	10974632	10092945	Sy7	27777036	28364796	To7	44061320	44676163	INV in G. sten, G. cyrt
Pv08	48850420	49053174	Gm14	42757778	42990498	Fa14	63518374	63698988	St14	42053555	42517260	Cy14	63735386	45179644	Sy14	45303738	64264205	To14	52079708	52570587	TD in G. tome
Pv08	52129836	58796624	Gm02	40564224	43032363	Fa7	48567898	51797322	St7	21039216	18402047	Cy7	7958045	5249487	Sy7	30038318	32540894	To7	46464286	51735877	INV in G. max, G. falc, G. synd
Pv08	53360678	57201975	Gm02	43504539	44528408	Fa7	53733425	52489463	St7	17803616	16532053	Cy7	4645981	3262624	Sy7	33067010	34228218	To7	51179893	50023254	INV in G. max, G. synd
Pv08	55240405	55096014	Gm14	2942279	2871676	Fa14	3156735	3103283	St14	3438361	3240921	Cy14	4344849	3661674	Sy14	3205183	4151523	To14	62478184	61960451	TD in G. sten
Pv08	55819558	55987231	Gm14	3430845	3545901	Fa14	3639201	3777355	St14	3855637	3998555	Cy14	4782783	5001697	Sy14	4126306	4285612	To14	62843885	62976521	INV in G. max
Pv08	60827556	60839512	Gm14	45845502	45837813	Fa14	66986042	66970423	St14	45541261	45511140	Cy14	68170642	47838692	Sy14	47804252	68136801	To14	55584211	55564013	TD in G. sten
Pv08	61537826	62611082	Gm02	47256480	48142243	Fa7	56837309	58011679	St7	13265920	51039431	Cy20	14266347	13956736	Sy7	37381308	38364406	To2	1512187	507003	INV in G. cyrt, G. tome
Pv08	63017774	62884156	Gm14	18693	241631	Fa14	3003	213441	St14	24729	235861	Cy14	548462	745715	Sy14	76757	258373	To14	64013899	63837965	INV in G. max, G. falc, G. sten, G. cyrt, G. synd
Pv09	411432	303192	Gm06	550887	478718	Fa6	610352	525721	St6	604161	521435	Cy6	598821	647492	Sy6	569747	509625	To6	563407	469628	TD in G. max
Pv09	7444912	6625692	Gm04	9025093	10075280	Fa4	9935725	13087455	St4	15307310	14362779	Cy4	11726940	14483581	Sy4	10653365	11807668	To4	5130599	4279477	INV in G. max, G. cyrt, G. synd
Pv09	16311077	16578217	Gm04	6638239	6794254	Fa4	8121518	7948771	St4	7410178	7578241	Cy4	8046134	8211421	Sy4	7661335	7842399	To14	7466216	7677929	INV in G. falc
Pv09	23371153	23389310	Gm04	47809450	47799310	Fa4	66605083	66587400	St4	28732262	28799802	Cy4	49050425	42807871	Sy4	42767977	49039412	To4	7164422	7155547	TD in G. sten
Pv09	25525659	25126961	Gm04	46066906	46465626	Fa4	64356934	64863026	St4	30895015	30426663	Cy4	46406571	47025648	Sy4	40788265	41244976	To20	2528964	1999818	INV in G. max, G. falc, G. cyrt, G. synd
Pv09	28152456	28060765	Gm06	17486456	17588732	Fa6	24013635	24182602	St12	33090534	32975195	Cy6	18680480	18541713	Sy6	19524321	19612460	To6	19312309	19517678	Translocation/insertin in G. max
Pv09	34315013	34362791	Gm15	16596569	16130672	Fa15	19556129	19348854	St15	18293687	18168709	Cy2	2828174	18108249	Sy2	17971680	2901634	To15	20110568	19967737	TD in G. max
Pv09	34741531	34303614	Gm09	6234620	6960792	Fa9	7881097	8875147	St9	11060026	10333109	Cy9	7513392	8966919	Sy9	7115160	7800101	To9	9416948	11940981	INV in G. max, G. synd, G. tome
Pv09	35802451	4629313	Gm11	30332208	30012390	Fa20	9730216	8643145	St20	8491378	7955694	Cy20	8070203	7708690	Sy20	8407964	8021858	To2	35306072	35713990	Translocation/insertin in G. falc, G. sten, G. cyrt, G. synd, G. tome
Pv09	36855449	36979669	Gm15	12165892	12326151	Fa15	14767550	14609905	St15	14470164	14319941	Cy2	5410795	5559119	Sy15	14570487	14402132	To15	16620860	16480727	INV in G. falc, G. sten, G. synd, G. tome
Pv09	37119774	36844178	Gm09	3589755	3883474	Fa9	4139501	4506478	St9	4131496	4459513	Cy9	4420332	52759939	Sy9	3984647	4329571	To9	2443604	5544182	INV in G. max, G. falc, G. sten, G. synd, G. tome
Pv09	37759369	38235130	Gm03	45421037	45759815	Fa19	71993629	66718774	St17	33890502	38921672	Cy1	431060	12406	Sy3	44443746	44810011	To3	49530812	49890756	INV in G. cyrt
Pv10	1289816	28325462	Gm04	11686402	17853601	Fa3	13891221	15847862	St3	9754713	10323473	Cy3	8333463	10736377	Sy3	11345324	7078821	To3	13234470	13931230	TD in G. tome
Pv10	15527623	15373215	Gm20	44351334	44385721	Fa20	68246509	68300205	St20	50239289	50278931	Cy20	57903641	53071932	Sy20	53115520	57927627	To20	49516124	49553226	TD in G. falc
Pv10	24294955	24099816	Gm01	47618364	47648188	Fa1	72188384	72335221	St1	43008258	43049996	Cy1	66750772	46443815	Sy1	46476003	66810132	To1	50809901	50873993	TD in G. falc
Pv10	24308342	24264183	Gm03	2768131	2642209	Fa3	2650256	2581878	St3	2541296	2533475	Cy14	73491144	2673538	Sy14	2623790	73589873	To3	2654569	2620599	TD in G. max
Pv10	24349033	34888005	Gm01	47401227	47120515	Fa1	72036807	71952804	St1	42815150	42803670	Cy1	66516741	46233494	Sy1	46142748	66421961	To1	50746350	50779992	TD in G. max
Pv10	30953527	31180663	Gm03	4265953	4003239	Fa3	3975687	3921021	St3	3972699	3717660	Cy14	72466881	4091109	Sy14	3823337	72539466	To3	4549015	4330648	TD in G. max
Pv10	33122216	12414655	Gm01	42526284	43229838	Fa3	23076905	18362975	St1	38749539	39276505	Cy1	61721428	62582905	Sy1	43053595	43737951	To1	47081080	47639141	INV in G. max, G. sten, G. synd, G. tome
Pv10	34066337	24197814	Gm03	1849093	2493916	Fa3	1744672	2486908	St3	1643603	2361999	Cy14	74414102	73810664	Sy3	1769433	2421091	To3	1858845	2501465	INV in G. max, G. falc, G. sten, G. synd, G. tome
Pv10	36643442	36376239	Gm03	822155	985497	Fa3	807447	966436	St3	718879	891130	Cy8	54253710	54116397	Sy3	828557	989005	To3	777978	943687	INV in G. max, G. falc, G. sten, G. synd, G. tome
Pv10	39616642	37196257	Gm16	1932165	3104980	Fa19	2041158	3446866	St19	2148229	3472534	Cy15	12294702	13656420	Sy19	2133845	3426329	To4	42878867	41469171	INV in G. max, G. falc, G. sten, G. cyrt, G. synd
Pv10	41189699	39758271	Gm07	3099619	4408559	Fa16	3294754	4782711	St16	5199893	3667150	Cy16	3254521	4913253	Sy16	3381325	5104438	To16	3488022	4990413	INV in G. max, G. cyrt, G. synd, G. tome
Pv10	43503065	43358749	Gm07	2388159	2528530	Fa16	2474722	2634834	St16	2632498	2806400	Cy16	2712898	2539061	Sy16	2636056	2798500	To16	2725276	2880628	INV in G. max, G. falc, G. sten, G. synd, G. tome
Pv10	43519517	861743	Gm08	17200661	8049074	Fa8	8097119	57844292	St8	9297982	7440146	Cy8	3839773	50653882	Sy8	19417171	46982853	To8	3721387	7691660	Translocation/insertin in G. max
Pv11	1014492	907783	Gm09	45092317	45185994	Fa9	59763431	59858381	St9	39833147	39923075	Cy9	64662778	64744064	Sy9	40948514	41060176	To15	5379353	5322193	INV in G. max
Pv11	1404011	1670002	-	-	-	Fa11	44220534	44849868	St11	37384831	37672887	Cy11	48364105	48565313	Sy12	36098236	39678133	To11	40639873	42309773	Deletion in G.max
Pv11	3527704	3748783	-	-	-	Fa4	4969035	5416351	St12	36343151	41312208	Cy11	48574391	51025434	Sy12	39691734	40746562	To11	42525769	42687431	Deletion in G.max
Pv11	5899973	5971287	Gm12	4778862	4828762	Fa12	6380079	6631236	St12	5590369	5654196	Cy12	13402233	5030069	Sy12	5075904	13433953	To12	5064866	5116534	TD in G. faclc
Pv11	7526302	7216296	Gm11	11090390	11345436	Fa11	44882279	44588918	St13	35734334	13045001	Cy11	13611512	13319020	Sy11	50345057	12819877	To11	13179586	12885647	INV in G. max
Pv11	8528453	7702830	Gm11	26312017	27013178	Fa11	45975936	45093981	St11	14596480	13519398	Cy11	14574531	13772875	Sy11	14095710	13270018	To11	14126324	13385440	INV in G. max
Pv11	9043112	8588040	Gm11	25981523	26273825	Fa11	44193556	46053843	St11	15048090	14681578	Cy11	15255529	14617759	Sy11	14431200	14153394	To11	14542786	14163553	INV in G. max, G. falc
Pv11	10190307	9176118	Gm11	24492152	25318127	Fa11	42094886	43774658	St11	16185428	15258542	Cy11	17188808	15653403	Sy11	15621784	14598887	To11	16169512	14932990	INV in G. max, G. falc
Pv11	31974566	30121696	Gm06	46757776	46801814	Fa6	71013046	71252091	St6	45688468	45760385	Cy6	60836993	45405113	Sy6	45509016	60963217	To6	51477119	51939995	TD in G. tome
Pv11	32552930	17367507	Gm12	13314318	12948820	Fa12	17583619	17150469	St12	14352250	13701344	Cy12	41698448	13603696	Sy12	13398621	41262384	To12	15149058	14851607	TD in G. sten
Pv11	44553722	44232345	Gm12	20216007	20591657	Fa12	35111549	37325375	St12	25773725	30833298	Cy6	52773459	46514888	Sy12	20434889	30300247	To12	24439956	34447066	INV in G. max
Pv11	51664417	51512432	Gm15	43139237	43042576	Fa15	60400091	42696283	St15	43271582	43227644	Cy15	58698691	37519945	Sy15	37651302	58193105	To15	46971558	46896555	TD in G. max
Pv11	53550459	53544017	Gm09	217752	212323	Fa12	60601088	60743248	St12	41247747	41281022	Cy9	221782	174475	Sy9	150705	206883	To9	172007	164177	TD in G. falc

## Sheet: Supplementary Table 7
Supplementary Table 7. Summary of copia-LTR-retrotransposons identified in the perennial Glycine genomes.
ID	G.falcata		G. stenophita		G. cyrtoloba		G.syndetika		G. tomentella D3
	Family sizes	Insertion times (MYA)	Family sizes	Insertion times (MYA)	Family sizes	Insertion times (MYA)	Family sizes	Insertion times (MYA)	Family sizes	Insertion times (MYA)
Pc1	Missing	Missing	13	0.521843	36	0.621731	186	0.331855	17	0.602583
Pc2	Missing	Missing	Missing	Missing	Missing	Missing	211	0.944198	295	0.973974
Pc3	Missing	Missing	2	2.30444	Missing	Missing	2	1.30862	Missing	Missing
Pc4	11	1.60295	39	1.18681	60	0.655526	66	1.02721	72	1.05281
Pc5	Missing	Missing	17	1.21511	Missing	Missing	43	1.62652	41	1.52404
Pc6	283	1.8212	960	0.589474	1896	0.657313	632	0.907099	446	1.02267
Pc7	52	1.4802	156	0.81655	18	1.43392	205	0.681206	25	1.62593
Pc8	Missing	Missing	Missing	Missing	Missing	Missing	3	2.6039	Missing	Missing
Pc9	Missing	Missing	Missing	Missing	4	0.245587	81	0.316859	Missing	Missing
Pc10	2	1.42047	Missing	Missing	Missing	Missing	3	1.9342	2	2.99645
Pc11	Missing	Missing	Missing	Missing	Missing	Missing	6	0.782926	6	0.762057
Pc12	113	2.60979	125	0.996312	3	2.76881	19	2.0425	9	3.02415
Pc13	3	2.26175	4	1.03367	3	1.62738	3	1.60276	3	1.67236
Pc14	7	1.36249	8	1.81817	Missing	Missing	9	1.93928	8	0.703486
Pc16	Missing	Missing	Missing	Missing	4	0.300107	36	0.197957	5	0.404356
Pc17	6	2.69471	9	2.6971	31	0.956465	81	1.13232	69	1.05938
Pc18	Missing	Missing	Missing	Missing	Missing	Missing	11	0.239084	Missing	Missing
Pc19	Missing	Missing	Missing	Missing	Missing	Missing	Missing	Missing	31	0.785225
Pc20	Missing	Missing	Missing	Missing	Missing	Missing	3	2.15414	Missing	Missing
Pc21	Missing	Missing	Missing	Missing	Missing	Missing	22	0.203482	Missing	Missing
Pc22	106	1.16535	29	0.571316	67	1.1279	52	1.01164	63	1.21174
Pc23	Missing	Missing	Missing	Missing	Missing	Missing	3	0.190503	Missing	Missing
Pc24	Missing	Missing	Missing	Missing	Missing	Missing	97	0.0624022	20	0.109093
Pc25	Missing	Missing	Missing	Missing	Missing	Missing	49	0.267005	24	0.456787
Pc26	Missing	Missing	4	0.258903	Missing	Missing	5	0.362279	8	0.518514
Pc27	3	1.40238	56	1.58817	13	1.72377	42	1.8223	75	0.99688
Pc28	12	2.13539	48	1.03362	Missing	Missing	35	0.765562	12	1.96256
Pc29	4	0.77772	5	1.04914	9	0.552703	8	0.90012	11	0.787921
Pc30	Missing	Missing	Missing	Missing	Missing	Missing	Missing	Missing	2	1.91871
Pc31	Missing	Missing	Missing	Missing	Missing	Missing	13	0.814018	39	0.435894
Pc33	Missing	Missing	Missing	Missing	2	0.0799646	9	0.262337	Missing	Missing
Pc34	Missing	Missing	Missing	Missing	Missing	Missing	9	0.724941	Missing	Missing
Pc35	Missing	Missing	Missing	Missing	5	0.473978	21	0.254672	13	0.371866
Pc36	Missing	Missing	Missing	Missing	Missing	Missing	Missing	Missing	5	0.810611
Pc37	Missing	Missing	Missing	Missing	Missing	Missing	23	0.386621	4	1.70675
Pc38	Missing	Missing	Missing	Missing	Missing	Missing	96	0.664251	54	0.529186
Pc39	Missing	Missing	4	1.26883	Missing	Missing	Missing	Missing	4	0.979327
Pc40	11	2.70688	44	1.57573	71	1.09337	35	2.1494	76	1.3592
Pc42	4	0.286063	5	0.457714	16	0.741505	4	0.558484	5	0.577008
Pc43	Missing	Missing	Missing	Missing	Missing	Missing	3	3.62199	Missing	Missing
Pc44	Missing	Missing	3	0.170308	4	0.214646	31	0.369537	3	0.269228
Pc45	Missing	Missing	Missing	Missing	Missing	Missing	2	0.0976369	Missing	Missing
Pc46	2	3.3565	8	1.92436	5	2.65139	6	2.40302	46	1.06778
Pc47	102	0.570279	3	0.242996	4	1.71301	Missing	Missing	10	0.316306
Pc48	Missing	Missing	Missing	Missing	Missing	Missing	27	0.197667	Missing	Missing
Pc49	Missing	Missing	2	0.54045	Missing	Missing	Missing	Missing	3	2.1314
Pc50	9	0.709147	17	0.905177	43	0.639504	22	0.718939	17	0.958083
Pc51	12	1.81087	19	1.07608	17	0.980669	29	0.974149	16	1.76939
Pc52	Missing	Missing	Missing	Missing	Missing	Missing	4	0.216363	Missing	Missing
Pc54	Missing	Missing	Missing	Missing	5	0.597147	2	0.275647	Missing	Missing
Pc55	161	1.1467	Missing	Missing	148	0.735124	18	0.886003	36	0.968019
Pc56	Missing	Missing	Missing	Missing	Missing	Missing	2	0.133192	Missing	Missing
Pc57	Missing	Missing	2	0.219894	Missing	Missing	Missing	Missing	3	0.845995
Pc58	Missing	Missing	Missing	Missing	Missing	Missing	4	1.17119	2	2.14523
Pc59	Missing	Missing	6	1.49268	46	1.85567	32	1.92833	52	1.48907
Pc60	53	0.711603	230	0.706381	Missing	Missing	62	1.4226	74	1.60096
Pc61	54	0.483357	Missing	Missing	Missing	Missing	19	0.547463	19	0.430766
Pc64	Missing	Missing	Missing	Missing	Missing	Missing	Missing	Missing	2	1.81921
Pc65	3	1.00401	5	0.720308	Missing	Missing	8	0.876895	7	0.991317
Pc66	40	1.09091	7	1.32034	Missing	Missing	25	1.24336	16	1.1625
Pc69	Missing	Missing	Missing	Missing	Missing	Missing	Missing	Missing	2	1.2951
Pc70	Missing	Missing	Missing	Missing	Missing	Missing	Missing	Missing	20	0.490873
Pc71	6	0.545112	4	0.560342	Missing	Missing	Missing	Missing	6	1.02779
Pc72	Missing	Missing	33	0.174202	Missing	Missing	17	0.342812	88	0.36698
Pc73	Missing	Missing	Missing	Missing	Missing	Missing	Missing	Missing	7	0.603151
Pc74	Missing	Missing	34	0.645306	Missing	Missing	5	0.0900766	17	0.690986
Pc76	Missing	Missing	438	0.580889	512	0.629334	39	0.708926	8	1.06854
Pc77	Missing	Missing	Missing	Missing	Missing	Missing	2	0.925948	3	0.403398
Pc78	Missing	Missing	Missing	Missing	2	1.87496	7	1.08496	Missing	Missing
Pc79	Missing	Missing	2	0.513789	Missing	Missing	9	0.780509	7	1.05286
Pc81	Missing	Missing	Missing	Missing	Missing	Missing	3	0.271999	Missing	Missing
Pc83	12	0.598909	Missing	Missing	87	0.46311	8	0.321928	9	0.425903
Pc85	Missing	Missing	Missing	Missing	Missing	Missing	17	0.193252	Missing	Missing
Pc86	Missing	Missing	Missing	Missing	Missing	Missing	Missing	Missing	4	0.613896
Pc87	Missing	Missing	Missing	Missing	5	0.491473	21	0.472515	7	0.421095
Pc88	28	1.72006	3	1.23996	81	1.28124	25	0.867429	26	0.901572
Pc89	34	1.9071	22	0.767074	49	1.19468	32	1.36237	15	1.09722
Pc90	6	2.93315	19	0.668352	18	2.33447	42	1.10667	29	1.25893
Pc92	8	2.48454	8	1.23472	4	1.41788	4	2.12712	3	1.68992
Pc93	16	2.06456	Missing	Missing	Missing	Missing	6	2.05727	Missing	Missing
Pc94	114	1.22373	115	1.30231	23	1.49967	44	1.56745	22	1.66773
Pc95	Missing	Missing	8	1.42693	10	2.15745	3	1.63274	12	1.56939
Pc96	Missing	Missing	Missing	Missing	4	0.222235	Missing	Missing	3	0.29431
Pc98	Missing	Missing	8	0.443511	3	0.261316	2	1.01427	10	0.663504
Pc100	Missing	Missing	46	0.123731	79	0.135477	34	0.118484	87	0.121875
Pc101	Missing	Missing	Missing	Missing	Missing	Missing	Missing	Missing	61	0.434317
Pc104	Missing	Missing	Missing	Missing	Missing	Missing	Missing	Missing	11	0.787857
Pc105	21	0.914332	2	3.84855	3	1.027	6	1.07646	5	0.996375
Pc106	Missing	Missing	Missing	Missing	Missing	Missing	2	0.616861	4	1.50421
Pc107	6	1.33299	5	0.673984	5	0.718321	4	1.23046	Missing	Missing
Pc108	Missing	Missing	Missing	Missing	Missing	Missing	3	1.54277	Missing	Missing
Pc109	Missing	Missing	Missing	Missing	Missing	Missing	3	0.197117	Missing	Missing
Pc110	Missing	Missing	Missing	Missing	Missing	Missing	2	1.054	5	1.66601
Pc111	Missing	Missing	Missing	Missing	Missing	Missing	2	0.79243	Missing	Missing
Pc112	Missing	Missing	2	2.18103	Missing	Missing	8	1.07629	7	0.98888
Pc113	Missing	Missing	Missing	Missing	Missing	Missing	11	0.247742	Missing	Missing
Pc116	6	1.38713	Missing	Missing	Missing	Missing	Missing	Missing	3	2.19267
Pc117	Missing	Missing	Missing	Missing	Missing	Missing	4	0.992636	Missing	Missing
Pc118	25	1.75535	160	0.702071	15	2.00075	18	1.73131	32	1.46264
Pc123	8	0.86802	3	0.700889	2	0.932437	4	0.437077	4	0.697965
Pc125	4	0.924497	3	1.34572	4	1.57983	Missing	Missing	3	1.02605
Pc127	Missing	Missing	17	0.427032	Missing	Missing	15	0.524188	7	1.00661
Pc128	Missing	Missing	Missing	Missing	Missing	Missing	Missing	Missing	4	1.69768
Pc129	Missing	Missing	7	0.291501	37	0.687332	4	0.750026	8	0.703025
Pc130	Missing	Missing	Missing	Missing	7	0.288978	25	0.157018	Missing	Missing
Pc131	2	0.692875	Missing	Missing	Missing	Missing	Missing	Missing	6	0.930111
Pc132	Missing	Missing	Missing	Missing	Missing	Missing	14	0.377287	Missing	Missing
Pc134	Missing	Missing	Missing	Missing	2	0.0624546	15	0.156682	3	0.199404
Pc138	Missing	Missing	Missing	Missing	Missing	Missing	3	0.414693	Missing	Missing
Pc139	Missing	Missing	Missing	Missing	Missing	Missing	3	1.97121	Missing	Missing
Pc140	Missing	Missing	Missing	Missing	Missing	Missing	23	0.277278	Missing	Missing
Pc141	Missing	Missing	Missing	Missing	Missing	Missing	3	0.185121	Missing	Missing
Pc143	Missing	Missing	Missing	Missing	Missing	Missing	23	0.170802	Missing	Missing
Pc144	3	1.23251	2	1.08156	3	0.392917	3	1.03767	8	0.716041
Pc145	Missing	Missing	Missing	Missing	Missing	Missing	4	0.14531	Missing	Missing
Pc146	3	3.32047	2	2.03542	Missing	Missing	3	2.38526	3	2.54122
Pc147	Missing	Missing	2	0.357525	Missing	Missing	3	0.884698	2	0.931605
Pc148	Missing	Missing	25	1.26219	Missing	Missing	Missing	Missing	4	2.09206
Pc149	Missing	Missing	Missing	Missing	Missing	Missing	5	0.29804	Missing	Missing
Pc150	Missing	Missing	Missing	Missing	Missing	Missing	19	1.43865	Missing	Missing
Pc153	Missing	Missing	28	0.304863	7	0.534984	24	0.586506	20	0.81178
Pc154	Missing	Missing	Missing	Missing	Missing	Missing	Missing	Missing	3	0.877441
Pc155	Missing	Missing	Missing	Missing	Missing	Missing	3	0.342378	Missing	Missing
Pc156	3	2.32732	Missing	Missing	Missing	Missing	2	0.746781	4	1.29
Pc159	17	1.54492	14	1.12478	13	0.995208	19	1.01505	16	1.1782
Pc161	Missing	Missing	Missing	Missing	Missing	Missing	Missing	Missing	2	2.28604
Pc163	2	2.27309	Missing	Missing	4	1.89573	4	1.03828	2	0.809079
Pc165	Missing	Missing	Missing	Missing	Missing	Missing	Missing	Missing	2	0.733708
Pc166	Missing	Missing	8	1.97376	14	1.22126	4	1.9093	2	1.5076
Pc168	Missing	Missing	Missing	Missing	Missing	Missing	25	0.140221	Missing	Missing
Pc170	8	1.20082	Missing	Missing	Missing	Missing	4	0.832592	3	1.99665
Pc171	Missing	Missing	Missing	Missing	Missing	Missing	Missing	Missing	3	1.7397
Pc172	Missing	Missing	Missing	Missing	Missing	Missing	2	1.84322	Missing	Missing
Pc173	2	1.45566	Missing	Missing	Missing	Missing	Missing	Missing	Missing	Missing
Pc174	Missing	Missing	Missing	Missing	Missing	Missing	Missing	Missing	2	1.71376
Pc176	Missing	Missing	4	1.80329	2	2.43113	11	2.57789	4	3.12582
Pc177	Missing	Missing	Missing	Missing	Missing	Missing	6	0.560517	Missing	Missing
Pc178	2	1.99977	Missing	Missing	Missing	Missing	Missing	Missing	2	1.95068
Pc179	Missing	Missing	Missing	Missing	Missing	Missing	Missing	Missing	2	1.03822
Pc180	Missing	Missing	Missing	Missing	Missing	Missing	11	0.501735	Missing	Missing
Pc182	Missing	Missing	Missing	Missing	Missing	Missing	3	0.309696	Missing	Missing
Pc183	Missing	Missing	6	2.408	2	3.00113	2	2.87225	4	2.61158
Pc184	Missing	Missing	Missing	Missing	Missing	Missing	3	0.210891	Missing	Missing
Pc186	Missing	Missing	Missing	Missing	Missing	Missing	2	0.167711	2	0.172991
Pc187	3	1.9043	4	1.89755	Missing	Missing	3	2.30168	2	1.98979
Pc190	Missing	Missing	Missing	Missing	Missing	Missing	5	0.82007	Missing	Missing
Pc191	Missing	Missing	7	1.45963	8	2.14331	2	2.09574	3	0.800524
Pc193	8	2.70064	Missing	Missing	Missing	Missing	3	0.462018	Missing	Missing
Pc194	Missing	Missing	Missing	Missing	Missing	Missing	5	0.117253	Missing	Missing
Pc196	Missing	Missing	Missing	Missing	Missing	Missing	Missing	Missing	4	0.96826
Pc199	Missing	Missing	Missing	Missing	Missing	Missing	Missing	Missing	2	0.460851
Pc200	2	1.00297	Missing	Missing	Missing	Missing	Missing	Missing	2	0.833288
Pc201	Missing	Missing	Missing	Missing	Missing	Missing	Missing	Missing	2	2.74824
Pc203	306	1.07056	14	1.25147	20	1.91647	13	2.05088	20	1.62246
Pc204	Missing	Missing	Missing	Missing	Missing	Missing	3	0.195384	Missing	Missing
Pc205	Missing	Missing	Missing	Missing	Missing	Missing	3	0.507607	2	1.08926
Pc206	Missing	Missing	2	1.3164	2	1.23434	Missing	Missing	3	0.622225
Pc207	2	2.35012	Missing	Missing	Missing	Missing	Missing	Missing	Missing	Missing
Pc208	Missing	Missing	Missing	Missing	Missing	Missing	2	1.65052	Missing	Missing
Pc209	Missing	Missing	2	2.88573	Missing	Missing	Missing	Missing	Missing	Missing
Pc210	Missing	Missing	Missing	Missing	Missing	Missing	2	2.82234	Missing	Missing
Pc213	Missing	Missing	Missing	Missing	Missing	Missing	Missing	Missing	3	0.637922
Pc215	Missing	Missing	Missing	Missing	Missing	Missing	6	0.231547	Missing	Missing
Pc216	Missing	Missing	Missing	Missing	Missing	Missing	4	0.435506	5	0.734477
Pc218	Missing	Missing	Missing	Missing	Missing	Missing	2	0.853048	Missing	Missing
Pc219	Missing	Missing	Missing	Missing	46	1.32282	5	1.41723	8	1.36141
Pc220	4	1.44904	Missing	Missing	3	1.57203	3	1.61357	4	1.46797
Pc221	Missing	Missing	2	3.34466	4	1.08456	3	1.59107	Missing	Missing
Pc223	Missing	Missing	Missing	Missing	Missing	Missing	2	1.99046	Missing	Missing
Pc224	Missing	Missing	95	1.93493	Missing	Missing	21	2.69105	4	2.41944
Pc226	Missing	Missing	Missing	Missing	3	3.14171	Missing	Missing	2	2.19141
Pc227	Missing	Missing	Missing	Missing	7	1.48778	3	1.82484	Missing	Missing
Pc229	Missing	Missing	Missing	Missing	Missing	Missing	Missing	Missing	3	2.06076
Pc230	Missing	Missing	Missing	Missing	Missing	Missing	6	0.229342	Missing	Missing
Pc232	Missing	Missing	Missing	Missing	Missing	Missing	2	1.41479	Missing	Missing
Pc234	Missing	Missing	4	1.75828	2	0.570116	Missing	Missing	4	0.681915
Pc235	Missing	Missing	Missing	Missing	Missing	Missing	5	0.311558	Missing	Missing
Pc237	Missing	Missing	Missing	Missing	Missing	Missing	2	1.00421	4	0.592139
Pc238	Missing	Missing	Missing	Missing	Missing	Missing	Missing	Missing	4	0.369597
Pc239	Missing	Missing	Missing	Missing	Missing	Missing	8	0.0910943	Missing	Missing
Pc241	3	2.11422	3	0.708266	3	0.884333	Missing	Missing	4	0.485151
Pc242	Missing	Missing	Missing	Missing	Missing	Missing	5	0.361668	Missing	Missing
Pc243	Missing	Missing	Missing	Missing	Missing	Missing	8	1.02574	3	1.18948
Pc245	2	0.555565	Missing	Missing	Missing	Missing	Missing	Missing	Missing	Missing
Pc246	13	0.541575	28	0.660944	Missing	Missing	19	1.08103	10	0.774309
Pc248	Missing	Missing	2	1.77377	Missing	Missing	Missing	Missing	2	1.5372
Pc249	3	0.749505	2	1.3047	2	1.97168	2	2.57563	4	1.82012
Pc250	Missing	Missing	3	1.8559	Missing	Missing	Missing	Missing	3	1.42468
Pc253	98	0.540735	32	0.929806	11	1.3035	9	1.19998	15	1.63228
Pc254	Missing	Missing	Missing	Missing	Missing	Missing	Missing	Missing	2	0.408266
Pc256	Missing	Missing	Missing	Missing	Missing	Missing	Missing	Missing	4	1.39888
Pc259	Missing	Missing	Missing	Missing	Missing	Missing	3	1.42059	Missing	Missing
Pc261	Missing	Missing	Missing	Missing	Missing	Missing	4	0.319302	Missing	Missing
Pc262	Missing	Missing	Missing	Missing	Missing	Missing	4	2.02654	Missing	Missing
Pc266	Missing	Missing	Missing	Missing	6	0.865035	2	1.58934	3	0.488903
Pc267	Missing	Missing	2	1.80357	Missing	Missing	Missing	Missing	Missing	Missing
Pc271	Missing	Missing	Missing	Missing	Missing	Missing	2	0.250872	Missing	Missing
Pc272	Missing	Missing	Missing	Missing	Missing	Missing	Missing	Missing	3	0.674795
Pc275	Missing	Missing	Missing	Missing	11	0.285694	9	0.151123	Missing	Missing
Pc278	Missing	Missing	2	1.9013	Missing	Missing	Missing	Missing	Missing	Missing
Pc279	Missing	Missing	Missing	Missing	Missing	Missing	Missing	Missing	4	1.10042
Pc280	3	1.8932	3	0.655602	Missing	Missing	5	1.12429	Missing	Missing
Pc281	Missing	Missing	Missing	Missing	Missing	Missing	Missing	Missing	2	1.7593
Pc282	Missing	Missing	2	1.23731	Missing	Missing	2	1.87228	6	1.22599
Pc287	Missing	Missing	6	0.965155	2	1.67714	4	1.25492	2	1.8354
Pc288	Missing	Missing	2	2.01791	Missing	Missing	Missing	Missing	Missing	Missing
Pc290	2	2.24243	4	0.7668	6	1.4077	Missing	Missing	6	0.873032
Pc291	Missing	Missing	Missing	Missing	Missing	Missing	Missing	Missing	8	0.475758
Pc292	Missing	Missing	Missing	Missing	3	0.750503	Missing	Missing	4	0.807606
Pc294	Missing	Missing	Missing	Missing	Missing	Missing	3	0.38345	Missing	Missing
Pc295	Missing	Missing	Missing	Missing	6	1.25208	3	0.496653	Missing	Missing
Pc296	Missing	Missing	Missing	Missing	Missing	Missing	4	0.440198	Missing	Missing
Pc297	4	0.723026	7	0.985862	2	2.77545	9	0.673419	3	1.12408
Pc298	Missing	Missing	Missing	Missing	Missing	Missing	Missing	Missing	2	1.64152
Pc300	Missing	Missing	Missing	Missing	Missing	Missing	8	0.278383	2	0.494455
Pc304	Missing	Missing	2	2.47816	Missing	Missing	14	0.725941	Missing	Missing
Pc308	Missing	Missing	Missing	Missing	Missing	Missing	3	0.202207	Missing	Missing
Pc311	2	1.77	Missing	Missing	3	1.10327	2	1.1498	2	2.74362
Pc314	3	1.09597	Missing	Missing	2	0.764506	Missing	Missing	Missing	Missing
Pc315	Missing	Missing	Missing	Missing	Missing	Missing	3	0.102275	Missing	Missing
Pc316	Missing	Missing	6	2.4699	Missing	Missing	6	2.89935	3	2.33012
Pc318	Missing	Missing	Missing	Missing	Missing	Missing	Missing	Missing	6	0.505254
Pc319	Missing	Missing	Missing	Missing	3	1.68341	Missing	Missing	Missing	Missing
Pc321	Missing	Missing	Missing	Missing	Missing	Missing	Missing	Missing	3	1.29815
Pc322	Missing	Missing	Missing	Missing	Missing	Missing	19	1.82042	Missing	Missing
Pc323	Missing	Missing	Missing	Missing	Missing	Missing	2	2.22197	Missing	Missing
Pc324	Missing	Missing	Missing	Missing	Missing	Missing	6	0.12506	Missing	Missing
Pc326	Missing	Missing	Missing	Missing	Missing	Missing	2	1.5678	Missing	Missing
Pc334	6	0.844668	2	0.835144	3	1.08501	2	0.415066	Missing	Missing
Pc339	2	2.89889	Missing	Missing	Missing	Missing	2	1.83843	Missing	Missing
Pc343	Missing	Missing	4	1.26989	Missing	Missing	Missing	Missing	6	1.20596
Pc345	Missing	Missing	Missing	Missing	Missing	Missing	2	2.33946	Missing	Missing
Pc347	Missing	Missing	Missing	Missing	Missing	Missing	Missing	Missing	5	0.632616
Pc348	Missing	Missing	Missing	Missing	Missing	Missing	Missing	Missing	2	1.61121
Pc350	Missing	Missing	Missing	Missing	Missing	Missing	2	1.41699	Missing	Missing
Pc353	Missing	Missing	Missing	Missing	Missing	Missing	2	0.813301	Missing	Missing
Pc358	Missing	Missing	Missing	Missing	3	2.32615	Missing	Missing	6	2.42348
Pc359	Missing	Missing	Missing	Missing	Missing	Missing	2	1.13881	Missing	Missing
Pc366	3	0.510382	Missing	Missing	Missing	Missing	Missing	Missing	Missing	Missing
Pc372	Missing	Missing	2	1.40015	2	1.35858	Missing	Missing	Missing	Missing
Pc373	Missing	Missing	Missing	Missing	Missing	Missing	2	0.59532	Missing	Missing
Pc376	Missing	Missing	3	0.471342	Missing	Missing	Missing	Missing	3	0.883704
Pc378	Missing	Missing	3	3.18808	Missing	Missing	2	2.72642	Missing	Missing
Pc380	Missing	Missing	2	2.17827	Missing	Missing	Missing	Missing	Missing	Missing
Pc387	Missing	Missing	Missing	Missing	Missing	Missing	2	2.56104	Missing	Missing
Pc391	Missing	Missing	Missing	Missing	Missing	Missing	2	1.18002	Missing	Missing
Pc398	Missing	Missing	Missing	Missing	Missing	Missing	Missing	Missing	2	0.748132
Pc400	2	1.85135	Missing	Missing	3	0.84256	Missing	Missing	Missing	Missing
Pc403	Missing	Missing	Missing	Missing	Missing	Missing	2	2.43672	Missing	Missing
Pc404	Missing	Missing	Missing	Missing	Missing	Missing	7	0.463106	Missing	Missing
Pc405	6	1.84268	Missing	Missing	Missing	Missing	Missing	Missing	Missing	Missing
Pc406	Missing	Missing	Missing	Missing	Missing	Missing	Missing	Missing	2	4.38003
Pc410	Missing	Missing	Missing	Missing	Missing	Missing	4	0.185396	Missing	Missing
Pc411	2	1.38993	Missing	Missing	Missing	Missing	2	0.366617	4	1.12964
Pc413	2	1.33068	3	0.914626	Missing	Missing	Missing	Missing	3	1.24451
Pc415	5	0.217595	Missing	Missing	Missing	Missing	Missing	Missing	Missing	Missing
Pc417	Missing	Missing	Missing	Missing	Missing	Missing	3	1.11378	Missing	Missing
Pc418	Missing	Missing	2	3.63868	Missing	Missing	Missing	Missing	Missing	Missing
Pc424	3	1.49452	Missing	Missing	Missing	Missing	Missing	Missing	2	2.76565
Pc426	Missing	Missing	Missing	Missing	Missing	Missing	2	0.0568677	Missing	Missing
Pc427	Missing	Missing	Missing	Missing	Missing	Missing	2	0.334573	Missing	Missing
Pc432	Missing	Missing	3	0.868324	3	1.67676	2	0.579567	2	1.03113
Pc435	Missing	Missing	Missing	Missing	Missing	Missing	3	0.929832	Missing	Missing
Pc439	Missing	Missing	Missing	Missing	Missing	Missing	Missing	Missing	2	2.30621
Pc440	Missing	Missing	Missing	Missing	Missing	Missing	Missing	Missing	2	0.229959
Pc444	Missing	Missing	Missing	Missing	Missing	Missing	4	0.018981	Missing	Missing
Pc454	Missing	Missing	Missing	Missing	2	0.29123	Missing	Missing	Missing	Missing
Pc455	Missing	Missing	Missing	Missing	Missing	Missing	2	2.08363	Missing	Missing
Pc456	Missing	Missing	2	3.02739	Missing	Missing	Missing	Missing	Missing	Missing
Pc457	5	0.760328	6	0.60118	Missing	Missing	Missing	Missing	4	1.19329
Pc459	Missing	Missing	Missing	Missing	Missing	Missing	4	0.193203	Missing	Missing
Pc460	Missing	Missing	3	0.891943	2	1.58442	Missing	Missing	Missing	Missing
Pc463	Missing	Missing	2	1.79001	Missing	Missing	Missing	Missing	Missing	Missing
Pc466	Missing	Missing	Missing	Missing	Missing	Missing	Missing	Missing	3	1.16518
Pc477	Missing	Missing	Missing	Missing	4	0.301472	Missing	Missing	2	0.490721
Pc478	Missing	Missing	4	2.0158	Missing	Missing	Missing	Missing	Missing	Missing
Pc481	Missing	Missing	4	1.08707	Missing	Missing	2	1.10396	Missing	Missing
Pc482	Missing	Missing	3	2.10349	Missing	Missing	Missing	Missing	2	3.63352
Pc483	Missing	Missing	Missing	Missing	Missing	Missing	2	0.106836	Missing	Missing
Pc484	Missing	Missing	Missing	Missing	Missing	Missing	Missing	Missing	4	2.61273
Pc487	Missing	Missing	Missing	Missing	Missing	Missing	Missing	Missing	2	1.67551
Pc488	Missing	Missing	Missing	Missing	Missing	Missing	2	1.05734	Missing	Missing
Pc489	11	0.688401	2	0.453161	Missing	Missing	Missing	Missing	Missing	Missing
Pc490	Missing	Missing	2	1.90648	3	3.07582	Missing	Missing	Missing	Missing
Pc492	5	2.49501	4	1.37141	5	1.47037	3	0.66408	6	1.28561
Pc495	Missing	Missing	Missing	Missing	Missing	Missing	2	1.70074	3	2.04994
Pc499	3	0.608718	Missing	Missing	Missing	Missing	Missing	Missing	2	1.16566
Pc502	13	0.528813	3	0.977264	4	1.8528	Missing	Missing	7	1.23378
Pc503	Missing	Missing	Missing	Missing	Missing	Missing	2	0.261185	Missing	Missing
Pc513	Missing	Missing	Missing	Missing	Missing	Missing	3	0.591233	Missing	Missing
Pc523	Missing	Missing	Missing	Missing	Missing	Missing	Missing	Missing	2	2.97605
Pc524	Missing	Missing	Missing	Missing	Missing	Missing	2	0.896748	Missing	Missing
Pc530	Missing	Missing	Missing	Missing	Missing	Missing	2	0.525005	2	0.737793
Pc534	Missing	Missing	Missing	Missing	Missing	Missing	2	1.38724	Missing	Missing
Pc547	Missing	Missing	Missing	Missing	Missing	Missing	2	1.24219	Missing	Missing
Pc548	Missing	Missing	Missing	Missing	Missing	Missing	Missing	Missing	2	1.66625
Pc557	Missing	Missing	Missing	Missing	Missing	Missing	2	2.32838	Missing	Missing
Pc558	Missing	Missing	Missing	Missing	Missing	Missing	2	0.657292	Missing	Missing
Pc573	3	1.10487	Missing	Missing	5	0.80846	Missing	Missing	2	0.514897
Pc584	Missing	Missing	2	1.20779	Missing	Missing	Missing	Missing	Missing	Missing
Pc587	Missing	Missing	Missing	Missing	Missing	Missing	Missing	Missing	2	0.32072
Pc599	12	0.974575	Missing	Missing	Missing	Missing	Missing	Missing	Missing	Missing
Pc602	Missing	Missing	Missing	Missing	Missing	Missing	Missing	Missing	2	1.36975
Pc605	Missing	Missing	Missing	Missing	Missing	Missing	Missing	Missing	2	0.208127
Pc614	Missing	Missing	Missing	Missing	Missing	Missing	3	2.67628	Missing	Missing
Pc617	Missing	Missing	Missing	Missing	Missing	Missing	Missing	Missing	2	0.684579
Pc619	Missing	Missing	Missing	Missing	2	2.46967	2	1.80187	Missing	Missing
Pc622	Missing	Missing	Missing	Missing	Missing	Missing	Missing	Missing	2	5.22017
Pc626	Missing	Missing	2	2.45071	Missing	Missing	Missing	Missing	Missing	Missing
Pc634	Missing	Missing	Missing	Missing	Missing	Missing	3	1.10223	Missing	Missing
Pc635	Missing	Missing	3	1.69249	Missing	Missing	2	0.813913	Missing	Missing
Pc642	Missing	Missing	2	3.02728	Missing	Missing	Missing	Missing	Missing	Missing
Pc649	Missing	Missing	Missing	Missing	Missing	Missing	2	0.118004	Missing	Missing
Pc652	Missing	Missing	2	2.37472	Missing	Missing	Missing	Missing	Missing	Missing
Pc662	6	1.21844	Missing	Missing	Missing	Missing	Missing	Missing	Missing	Missing
Pc663	Missing	Missing	6	1.65705	Missing	Missing	2	2.01483	Missing	Missing
Pc667	Missing	Missing	Missing	Missing	Missing	Missing	2	2.10626	Missing	Missing
Pc670	2	1.73591	7	1.20713	17	1.08173	Missing	Missing	Missing	Missing
Pc675	Missing	Missing	Missing	Missing	Missing	Missing	Missing	Missing	2	0.807921
Pc679	Missing	Missing	Missing	Missing	Missing	Missing	Missing	Missing	2	2.18593
Pc681	Missing	Missing	Missing	Missing	6	0.858801	Missing	Missing	Missing	Missing
Pc684	Missing	Missing	Missing	Missing	Missing	Missing	Missing	Missing	2	0.787178
Pc686	3	0.634965	Missing	Missing	Missing	Missing	2	1.05169	Missing	Missing
Pc694	2	0.23704	Missing	Missing	Missing	Missing	Missing	Missing	Missing	Missing
Pc700	2	2.27649	2	1.17879	3	0.344391	Missing	Missing	Missing	Missing
Pc704	Missing	Missing	Missing	Missing	Missing	Missing	Missing	Missing	2	1.08249
Pc713	Missing	Missing	2	2.66215	Missing	Missing	Missing	Missing	Missing	Missing
Pc721	Missing	Missing	Missing	Missing	Missing	Missing	Missing	Missing	2	1.56842
Pc724	Missing	Missing	Missing	Missing	2	2.12806	Missing	Missing	Missing	Missing
Pc759	Missing	Missing	Missing	Missing	110	0.424084	Missing	Missing	Missing	Missing
Pc760	Missing	Missing	Missing	Missing	2	3.43377	Missing	Missing	Missing	Missing
Pc761	Missing	Missing	Missing	Missing	2	2.57791	Missing	Missing	Missing	Missing
Pc762	Missing	Missing	Missing	Missing	4	2.14602	Missing	Missing	Missing	Missing
Pc763	Missing	Missing	Missing	Missing	11	1.00014	Missing	Missing	Missing	Missing
Pc764	5	0.367159	Missing	Missing	9	0.338751	Missing	Missing	Missing	Missing
Pc765	Missing	Missing	Missing	Missing	19	0.309011	Missing	Missing	Missing	Missing
Pc766	Missing	Missing	Missing	Missing	214	0.519952	Missing	Missing	Missing	Missing
Pc767	Missing	Missing	Missing	Missing	17	2.25673	Missing	Missing	Missing	Missing
Pc768	Missing	Missing	Missing	Missing	7	0.814041	Missing	Missing	Missing	Missing
Pc769	Missing	Missing	8	0.138843	47	0.383478	Missing	Missing	Missing	Missing
Pc770	Missing	Missing	Missing	Missing	12	0.192966	Missing	Missing	Missing	Missing
Pc771	Missing	Missing	Missing	Missing	26	0.915018	Missing	Missing	Missing	Missing
Pc773	Missing	Missing	Missing	Missing	5	1.53163	Missing	Missing	Missing	Missing
Pc774	Missing	Missing	Missing	Missing	8	0.796128	Missing	Missing	Missing	Missing
Pc775	Missing	Missing	Missing	Missing	50	1.06752	Missing	Missing	Missing	Missing
Pc776	Missing	Missing	Missing	Missing	2	1.73509	Missing	Missing	Missing	Missing
Pc778	Missing	Missing	Missing	Missing	2	0.0433079	Missing	Missing	Missing	Missing
Pc779	Missing	Missing	3	0.585623	4	1.01454	Missing	Missing	Missing	Missing
Pc781	Missing	Missing	Missing	Missing	8	0.87067	Missing	Missing	Missing	Missing
Pc782	Missing	Missing	Missing	Missing	5	0.866342	Missing	Missing	Missing	Missing
Pc783	Missing	Missing	Missing	Missing	2	1.36089	Missing	Missing	Missing	Missing
Pc784	Missing	Missing	Missing	Missing	2	2.55342	Missing	Missing	Missing	Missing
Pc785	Missing	Missing	Missing	Missing	27	0.376179	Missing	Missing	Missing	Missing
Pc786	Missing	Missing	Missing	Missing	10	1.10449	Missing	Missing	Missing	Missing
Pc787	Missing	Missing	Missing	Missing	13	0.351914	Missing	Missing	Missing	Missing
Pc788	Missing	Missing	Missing	Missing	2	1.19477	Missing	Missing	Missing	Missing
Pc789	Missing	Missing	Missing	Missing	22	1.00362	Missing	Missing	Missing	Missing
Pc790	Missing	Missing	Missing	Missing	3	1.58165	Missing	Missing	Missing	Missing
Pc791	Missing	Missing	Missing	Missing	2	1.88246	Missing	Missing	Missing	Missing
Pc792	Missing	Missing	Missing	Missing	7	0.545843	Missing	Missing	Missing	Missing
Pc793	Missing	Missing	Missing	Missing	2	1.94012	Missing	Missing	Missing	Missing
Pc794	Missing	Missing	Missing	Missing	3	0.596521	Missing	Missing	Missing	Missing
Pc795	Missing	Missing	Missing	Missing	4	0.855675	Missing	Missing	Missing	Missing
Pc796	Missing	Missing	Missing	Missing	22	0.357638	Missing	Missing	Missing	Missing
Pc797	Missing	Missing	Missing	Missing	3	1.62242	Missing	Missing	Missing	Missing
Pc798	Missing	Missing	Missing	Missing	2	0.827316	Missing	Missing	Missing	Missing
Pc799	Missing	Missing	Missing	Missing	2	1.05653	Missing	Missing	Missing	Missing
Pc800	Missing	Missing	Missing	Missing	15	0.379458	Missing	Missing	Missing	Missing
Pc801	Missing	Missing	Missing	Missing	6	1.57272	Missing	Missing	Missing	Missing
Pc802	Missing	Missing	Missing	Missing	5	0.749436	Missing	Missing	Missing	Missing
Pc803	Missing	Missing	Missing	Missing	4	0.61237	Missing	Missing	Missing	Missing
Pc804	Missing	Missing	Missing	Missing	5	0.324159	Missing	Missing	Missing	Missing
Pc805	Missing	Missing	Missing	Missing	3	1.56042	Missing	Missing	Missing	Missing
Pc806	Missing	Missing	6	0.404703	22	0.554548	Missing	Missing	Missing	Missing
Pc808	Missing	Missing	Missing	Missing	6	1.43521	Missing	Missing	Missing	Missing
Pc809	Missing	Missing	Missing	Missing	3	0.0913395	Missing	Missing	Missing	Missing
Pc810	9	1.88043	Missing	Missing	26	0.749935	Missing	Missing	Missing	Missing
Pc811	Missing	Missing	Missing	Missing	2	0.162787	Missing	Missing	Missing	Missing
Pc813	Missing	Missing	Missing	Missing	2	2.42337	Missing	Missing	Missing	Missing
Pc815	Missing	Missing	Missing	Missing	2	0.739212	Missing	Missing	Missing	Missing
Pc816	Missing	Missing	Missing	Missing	2	2.59437	Missing	Missing	Missing	Missing
Pc817	Missing	Missing	Missing	Missing	3	0.411353	Missing	Missing	Missing	Missing
Pc818	Missing	Missing	Missing	Missing	5	1.2833	Missing	Missing	Missing	Missing
Pc819	Missing	Missing	Missing	Missing	2	2.4551	Missing	Missing	Missing	Missing
Pc821	Missing	Missing	Missing	Missing	2	2.03276	Missing	Missing	Missing	Missing
Pc824	Missing	Missing	Missing	Missing	3	1.41023	Missing	Missing	Missing	Missing
Pc825	Missing	Missing	Missing	Missing	13	0.995104	Missing	Missing	Missing	Missing
Pc826	2	0.503838	Missing	Missing	Missing	Missing	Missing	Missing	Missing	Missing
Pc827	Missing	Missing	Missing	Missing	2	0.202609	Missing	Missing	Missing	Missing
Pc828	Missing	Missing	Missing	Missing	3	0.832794	Missing	Missing	Missing	Missing
Pc829	Missing	Missing	Missing	Missing	4	3.32762	Missing	Missing	Missing	Missing
Pc830	Missing	Missing	Missing	Missing	2	1.45774	Missing	Missing	Missing	Missing
Pc831	Missing	Missing	Missing	Missing	2	0.398122	Missing	Missing	Missing	Missing
Pc832	Missing	Missing	Missing	Missing	2	1.24389	Missing	Missing	Missing	Missing
Pc833	Missing	Missing	Missing	Missing	6	1.54266	Missing	Missing	Missing	Missing
Pc834	Missing	Missing	Missing	Missing	2	1.33477	Missing	Missing	Missing	Missing
Pc835	Missing	Missing	Missing	Missing	5	2.57223	Missing	Missing	Missing	Missing
Pc836	Missing	Missing	Missing	Missing	2	0.77692	Missing	Missing	Missing	Missing
Pc837	Missing	Missing	Missing	Missing	7	2.72453	Missing	Missing	Missing	Missing
Pc838	Missing	Missing	Missing	Missing	2	1.05651	Missing	Missing	Missing	Missing
Pc839	Missing	Missing	Missing	Missing	2	2.86829	Missing	Missing	Missing	Missing
Pc841	Missing	Missing	Missing	Missing	3	0.281516	Missing	Missing	Missing	Missing
Pc842	7	3.21433	Missing	Missing	2	3.04614	Missing	Missing	Missing	Missing
Pc843	Missing	Missing	Missing	Missing	2	2.72734	Missing	Missing	Missing	Missing
Pc845	Missing	Missing	Missing	Missing	4	0.772641	Missing	Missing	Missing	Missing
Pc846	Missing	Missing	Missing	Missing	2	1.26471	Missing	Missing	Missing	Missing
Pc847	Missing	Missing	Missing	Missing	3	0.18539	Missing	Missing	Missing	Missing
Pc849	Missing	Missing	Missing	Missing	4	0.427943	Missing	Missing	Missing	Missing
Pc850	Missing	Missing	Missing	Missing	3	0.40754	Missing	Missing	Missing	Missing
Pc851	Missing	Missing	Missing	Missing	2	3.3113	Missing	Missing	Missing	Missing
Pc852	Missing	Missing	Missing	Missing	8	1.70993	Missing	Missing	Missing	Missing
Pc853	Missing	Missing	Missing	Missing	2	1.7116	Missing	Missing	Missing	Missing
Pc855	Missing	Missing	Missing	Missing	2	2.39297	Missing	Missing	Missing	Missing
Pc857	Missing	Missing	Missing	Missing	2	1.65333	Missing	Missing	Missing	Missing
Pc858	Missing	Missing	Missing	Missing	8	4.8501	Missing	Missing	Missing	Missing
Pc859	Missing	Missing	Missing	Missing	5	0.282332	Missing	Missing	Missing	Missing
Pc860	Missing	Missing	Missing	Missing	2	0.427166	Missing	Missing	Missing	Missing
Pc861	Missing	Missing	Missing	Missing	4	2.30855	Missing	Missing	Missing	Missing
Pc863	Missing	Missing	Missing	Missing	2	1.17711	Missing	Missing	Missing	Missing
Pc864	Missing	Missing	Missing	Missing	2	0.580917	Missing	Missing	Missing	Missing
Pc865	Missing	Missing	Missing	Missing	8	2.09663	Missing	Missing	Missing	Missing
Pc866	Missing	Missing	Missing	Missing	4	1.30887	Missing	Missing	Missing	Missing
Pc867	Missing	Missing	Missing	Missing	3	0.6728	Missing	Missing	Missing	Missing
Pc868	Missing	Missing	Missing	Missing	4	2.34389	Missing	Missing	Missing	Missing
Pc869	Missing	Missing	Missing	Missing	2	1.39831	Missing	Missing	Missing	Missing
Pc870	Missing	Missing	Missing	Missing	4	0.650568	Missing	Missing	Missing	Missing
Pc872	Missing	Missing	Missing	Missing	8	0.591609	Missing	Missing	Missing	Missing
Pc874	Missing	Missing	Missing	Missing	10	1.16867	Missing	Missing	Missing	Missing
Pc875	2	1.80493	Missing	Missing	Missing	Missing	Missing	Missing	Missing	Missing
Pc876	Missing	Missing	Missing	Missing	3	0.971956	Missing	Missing	Missing	Missing
Pc877	Missing	Missing	2	0.490783	Missing	Missing	Missing	Missing	Missing	Missing
Pc878	Missing	Missing	Missing	Missing	5	0.530336	Missing	Missing	Missing	Missing
Pc879	Missing	Missing	Missing	Missing	2	1.0705	Missing	Missing	Missing	Missing
Pc881	Missing	Missing	Missing	Missing	2	1.06656	Missing	Missing	Missing	Missing
Pc883	Missing	Missing	Missing	Missing	2	1.21333	Missing	Missing	Missing	Missing
Pc884	Missing	Missing	Missing	Missing	4	0.0977605	Missing	Missing	Missing	Missing
Pc885	Missing	Missing	Missing	Missing	2	0.503337	Missing	Missing	Missing	Missing
Pc886	Missing	Missing	3	0.244855	2	0.970152	Missing	Missing	Missing	Missing
Pc887	Missing	Missing	Missing	Missing	4	1.46761	Missing	Missing	Missing	Missing
Pc888	Missing	Missing	Missing	Missing	2	1.5249	Missing	Missing	Missing	Missing
Pc889	Missing	Missing	Missing	Missing	3	0.921192	Missing	Missing	Missing	Missing
Pc890	Missing	Missing	Missing	Missing	2	2.71242	Missing	Missing	Missing	Missing
Pc891	Missing	Missing	Missing	Missing	2	0.92109	Missing	Missing	Missing	Missing
Pc892	Missing	Missing	Missing	Missing	5	1.31205	Missing	Missing	Missing	Missing
Pc893	Missing	Missing	Missing	Missing	5	0.580179	Missing	Missing	Missing	Missing
Pc894	Missing	Missing	Missing	Missing	2	0.49792	Missing	Missing	Missing	Missing
Pc895	Missing	Missing	Missing	Missing	3	0.403725	Missing	Missing	Missing	Missing
Pc896	Missing	Missing	Missing	Missing	3	2.54739	Missing	Missing	Missing	Missing
Pc897	Missing	Missing	Missing	Missing	2	1.02958	Missing	Missing	Missing	Missing
Pc898	37	1.065	Missing	Missing	2	0.796527	Missing	Missing	Missing	Missing
Pc899	Missing	Missing	Missing	Missing	3	0.569827	Missing	Missing	Missing	Missing
Pc900	Missing	Missing	Missing	Missing	3	0.888776	Missing	Missing	Missing	Missing
Pc901	2	1.85152	Missing	Missing	3	1.2295	Missing	Missing	Missing	Missing
Pc902	5	1.3895	Missing	Missing	Missing	Missing	Missing	Missing	3	2.56149
Pc903	Missing	Missing	Missing	Missing	2	0.802817	Missing	Missing	Missing	Missing
Pc904	Missing	Missing	2	0.812052	2	1.09658	Missing	Missing	Missing	Missing
Pc905	Missing	Missing	Missing	Missing	3	0.477799	Missing	Missing	Missing	Missing
Pc908	Missing	Missing	Missing	Missing	2	0.985308	Missing	Missing	Missing	Missing
Pc911	Missing	Missing	Missing	Missing	2	1.58668	Missing	Missing	Missing	Missing
Pc912	Missing	Missing	Missing	Missing	3	0.177897	Missing	Missing	Missing	Missing
Pc913	Missing	Missing	Missing	Missing	2	0.864585	Missing	Missing	Missing	Missing
Pc919	Missing	Missing	Missing	Missing	2	0.771077	Missing	Missing	Missing	Missing
Pc921	3	1.56935	Missing	Missing	Missing	Missing	3	1.30904	Missing	Missing
Pc922	Missing	Missing	Missing	Missing	2	0.866258	Missing	Missing	Missing	Missing
Pc925	Missing	Missing	Missing	Missing	Missing	Missing	3	0.0881635	Missing	Missing
Pc927	Missing	Missing	Missing	Missing	Missing	Missing	2	1.331	Missing	Missing
Pc928	Missing	Missing	Missing	Missing	Missing	Missing	3	0.0689262	Missing	Missing
Pc929	Missing	Missing	Missing	Missing	Missing	Missing	2	2.4431	Missing	Missing
Pc933	Missing	Missing	Missing	Missing	Missing	Missing	Missing	Missing	2	1.18886
Pc934	Missing	Missing	Missing	Missing	Missing	Missing	Missing	Missing	2	0.676673
Pc935	Missing	Missing	Missing	Missing	Missing	Missing	Missing	Missing	2	0.978746
Pc939	Missing	Missing	Missing	Missing	Missing	Missing	Missing	Missing	3	1.31045
Pc940	Missing	Missing	Missing	Missing	Missing	Missing	Missing	Missing	2	0.671848
Pc941	Missing	Missing	Missing	Missing	Missing	Missing	Missing	Missing	2	1.02853
Pc944	2	1.5155	Missing	Missing	Missing	Missing	Missing	Missing	Missing	Missing
Pc946	70	0.400019	Missing	Missing	Missing	Missing	Missing	Missing	Missing	Missing
Pc947	2774	0.542551	Missing	Missing	Missing	Missing	Missing	Missing	Missing	Missing
Pc948	13	0.585924	Missing	Missing	Missing	Missing	Missing	Missing	Missing	Missing
Pc949	2	2.03331	Missing	Missing	Missing	Missing	Missing	Missing	Missing	Missing
Pc950	21	0.484024	Missing	Missing	Missing	Missing	Missing	Missing	Missing	Missing
Pc951	11	2.21245	Missing	Missing	Missing	Missing	Missing	Missing	Missing	Missing
Pc952	2	0.14014	Missing	Missing	Missing	Missing	Missing	Missing	Missing	Missing
Pc953	17	1.12068	Missing	Missing	Missing	Missing	Missing	Missing	Missing	Missing
Pc954	8	1.44061	Missing	Missing	Missing	Missing	Missing	Missing	Missing	Missing
Pc955	2	4.56106	Missing	Missing	Missing	Missing	Missing	Missing	Missing	Missing
Pc957	20	0.358575	Missing	Missing	Missing	Missing	Missing	Missing	Missing	Missing
Pc958	6	0.937805	Missing	Missing	Missing	Missing	Missing	Missing	Missing	Missing
Pc959	47	1.16367	Missing	Missing	Missing	Missing	Missing	Missing	Missing	Missing
Pc960	2	2.15858	Missing	Missing	Missing	Missing	Missing	Missing	Missing	Missing
Pc961	4	0.577285	Missing	Missing	Missing	Missing	Missing	Missing	Missing	Missing
Pc962	23	1.84161	Missing	Missing	Missing	Missing	Missing	Missing	Missing	Missing
Pc964	4	1.15494	Missing	Missing	Missing	Missing	Missing	Missing	Missing	Missing
Pc965	6	1.20244	Missing	Missing	Missing	Missing	Missing	Missing	Missing	Missing
Pc966	25	0.835597	Missing	Missing	Missing	Missing	Missing	Missing	Missing	Missing
Pc967	2	1.84294	Missing	Missing	Missing	Missing	Missing	Missing	Missing	Missing
Pc968	5	0.677934	Missing	Missing	Missing	Missing	Missing	Missing	Missing	Missing
Pc969	6	1.56755	Missing	Missing	Missing	Missing	Missing	Missing	Missing	Missing
Pc970	24	1.5778	Missing	Missing	Missing	Missing	Missing	Missing	Missing	Missing
Pc971	2	1.11478	Missing	Missing	Missing	Missing	Missing	Missing	Missing	Missing
Pc972	2	1.31638	Missing	Missing	Missing	Missing	Missing	Missing	Missing	Missing
Pc973	8	2.81907	Missing	Missing	Missing	Missing	Missing	Missing	Missing	Missing
Pc974	8	1.11219	Missing	Missing	Missing	Missing	Missing	Missing	Missing	Missing
Pc976	25	3.22503	Missing	Missing	Missing	Missing	Missing	Missing	Missing	Missing
Pc977	2	1.9284	Missing	Missing	Missing	Missing	Missing	Missing	Missing	Missing
Pc978	16	0.955021	Missing	Missing	Missing	Missing	Missing	Missing	Missing	Missing
Pc979	6	1.78803	Missing	Missing	Missing	Missing	Missing	Missing	Missing	Missing
Pc980	3	3.22244	Missing	Missing	Missing	Missing	Missing	Missing	Missing	Missing
Pc981	4	1.51863	Missing	Missing	Missing	Missing	Missing	Missing	Missing	Missing
Pc983	2	3.43732	Missing	Missing	Missing	Missing	Missing	Missing	Missing	Missing
Pc984	2	1.90306	Missing	Missing	Missing	Missing	Missing	Missing	Missing	Missing
Pc985	7	0.44278	Missing	Missing	Missing	Missing	Missing	Missing	Missing	Missing
Pc986	4	1.51797	Missing	Missing	Missing	Missing	Missing	Missing	Missing	Missing
Pc987	2	3.59256	Missing	Missing	Missing	Missing	Missing	Missing	Missing	Missing
Pc989	2	0.984729	Missing	Missing	Missing	Missing	Missing	Missing	Missing	Missing
Pc990	5	2.6097	Missing	Missing	Missing	Missing	Missing	Missing	Missing	Missing
Pc991	2	0.589616	Missing	Missing	Missing	Missing	Missing	Missing	Missing	Missing
Pc992	2	1.31021	Missing	Missing	Missing	Missing	Missing	Missing	Missing	Missing
Pc993	3	0.54304	Missing	Missing	Missing	Missing	Missing	Missing	Missing	Missing
Pc994	2	2.79301	Missing	Missing	Missing	Missing	Missing	Missing	Missing	Missing
Pc995	3	0.652281	Missing	Missing	Missing	Missing	Missing	Missing	Missing	Missing
Pc996	14	3.34213	Missing	Missing	Missing	Missing	Missing	Missing	Missing	Missing
Pc997	21	0.443297	Missing	Missing	Missing	Missing	Missing	Missing	Missing	Missing
Pc998	2	1.14331	Missing	Missing	Missing	Missing	Missing	Missing	Missing	Missing
Pc999	3	1.62441	Missing	Missing	Missing	Missing	Missing	Missing	Missing	Missing
Pc1000	8	1.94705	Missing	Missing	Missing	Missing	Missing	Missing	Missing	Missing
Pc1001	2	0.505602	Missing	Missing	Missing	Missing	Missing	Missing	Missing	Missing
Pc1002	2	1.74642	Missing	Missing	Missing	Missing	Missing	Missing	Missing	Missing
Pc1003	2	0.118958	Missing	Missing	Missing	Missing	Missing	Missing	Missing	Missing
Pc1004	2	2.16052	Missing	Missing	Missing	Missing	Missing	Missing	Missing	Missing
Pc1005	5	0.145468	Missing	Missing	Missing	Missing	Missing	Missing	Missing	Missing
Pc1007	6	0.762189	Missing	Missing	Missing	Missing	Missing	Missing	Missing	Missing
Pc1008	7	1.78699	Missing	Missing	Missing	Missing	Missing	Missing	Missing	Missing
Pc1009	4	1.92916	Missing	Missing	Missing	Missing	Missing	Missing	Missing	Missing
Pc1010	5	1.06898	Missing	Missing	Missing	Missing	Missing	Missing	Missing	Missing
Pc1011	6	1.12781	Missing	Missing	Missing	Missing	Missing	Missing	Missing	Missing
Pc1013	2	3.96305	Missing	Missing	Missing	Missing	Missing	Missing	Missing	Missing
Pc1014	8	0.263833	Missing	Missing	Missing	Missing	Missing	Missing	Missing	Missing
Pc1015	2	2.33035	Missing	Missing	Missing	Missing	Missing	Missing	Missing	Missing
Pc1016	2	1.83145	Missing	Missing	Missing	Missing	Missing	Missing	Missing	Missing
Pc1017	5	1.28056	Missing	Missing	Missing	Missing	Missing	Missing	Missing	Missing
Pc1019	2	1.25717	Missing	Missing	Missing	Missing	Missing	Missing	Missing	Missing
Pc1020	2	0.523678	Missing	Missing	Missing	Missing	Missing	Missing	Missing	Missing
Pc1022	7	1.26174	Missing	Missing	Missing	Missing	Missing	Missing	Missing	Missing
Pc1023	3	2.20595	Missing	Missing	Missing	Missing	Missing	Missing	Missing	Missing
Pc1025	4	0.523333	Missing	Missing	Missing	Missing	Missing	Missing	Missing	Missing
Pc1026	2	0.590447	Missing	Missing	Missing	Missing	Missing	Missing	Missing	Missing
Pc1027	2	2.37672	Missing	Missing	Missing	Missing	Missing	Missing	Missing	Missing
Pc1031	2	1.03264	Missing	Missing	Missing	Missing	Missing	Missing	Missing	Missing
Pc1032	2	1.5404	Missing	Missing	Missing	Missing	Missing	Missing	Missing	Missing
Pc1033	4	1.51218	Missing	Missing	Missing	Missing	Missing	Missing	Missing	Missing
Pc1034	2	0.421985	Missing	Missing	Missing	Missing	Missing	Missing	Missing	Missing
Pc1035	6	2.84439	Missing	Missing	Missing	Missing	Missing	Missing	Missing	Missing
Pc1036	2	1.65574	Missing	Missing	Missing	Missing	Missing	Missing	Missing	Missing
Pc1037	3	1.50964	Missing	Missing	Missing	Missing	Missing	Missing	Missing	Missing
Pc1040	3	1.56924	Missing	Missing	Missing	Missing	Missing	Missing	Missing	Missing
Pc1042	2	2.57767	Missing	Missing	Missing	Missing	Missing	Missing	Missing	Missing
Pc1043	2	5.81122	Missing	Missing	Missing	Missing	Missing	Missing	Missing	Missing
Pc1044	2	1.84926	Missing	Missing	Missing	Missing	Missing	Missing	Missing	Missing
Pc1045	6	2.01798	Missing	Missing	Missing	Missing	Missing	Missing	Missing	Missing
Pc1046	2	1.31534	Missing	Missing	Missing	Missing	Missing	Missing	Missing	Missing
Pc1047	4	0.584459	Missing	Missing	Missing	Missing	Missing	Missing	Missing	Missing
Pc1048	2	4.05178	Missing	Missing	Missing	Missing	Missing	Missing	Missing	Missing
Pc1049	5	2.02664	Missing	Missing	Missing	Missing	Missing	Missing	Missing	Missing
Pc1050	2	0.94663	Missing	Missing	Missing	Missing	Missing	Missing	Missing	Missing
Pc1051	5	1.52452	Missing	Missing	Missing	Missing	Missing	Missing	Missing	Missing
Pc1052	Missing	Missing	3	2.10128	Missing	Missing	Missing	Missing	Missing	Missing
Pc1053	3	0.610471	Missing	Missing	Missing	Missing	Missing	Missing	Missing	Missing
Pc1055	2	2.76669	Missing	Missing	Missing	Missing	Missing	Missing	Missing	Missing
Pc1057	2	3.5723	Missing	Missing	Missing	Missing	Missing	Missing	Missing	Missing
Pc1059	2	0.724359	Missing	Missing	Missing	Missing	Missing	Missing	Missing	Missing
Pc1060	2	1.34897	Missing	Missing	Missing	Missing	Missing	Missing	Missing	Missing
Pc1062	5	1.97427	Missing	Missing	Missing	Missing	Missing	Missing	Missing	Missing
Pc1064	4	0.821998	Missing	Missing	Missing	Missing	Missing	Missing	Missing	Missing
Pc1065	4	1.03583	Missing	Missing	Missing	Missing	Missing	Missing	Missing	Missing
Pc1066	2	1.87503	3	2.1093	Missing	Missing	Missing	Missing	Missing	Missing
Pc1067	2	3.18436	Missing	Missing	Missing	Missing	Missing	Missing	Missing	Missing
Pc1068	2	1.92351	Missing	Missing	Missing	Missing	Missing	Missing	Missing	Missing
Pc1069	2	0.221335	Missing	Missing	Missing	Missing	Missing	Missing	Missing	Missing
Pc1070	2	0.945033	Missing	Missing	Missing	Missing	Missing	Missing	Missing	Missing
Pc1071	5	1.11491	Missing	Missing	Missing	Missing	Missing	Missing	Missing	Missing
Pc1073	3	1.87925	Missing	Missing	Missing	Missing	Missing	Missing	Missing	Missing
Pc1074	2	1.60996	Missing	Missing	Missing	Missing	Missing	Missing	Missing	Missing
Pc1075	2	3.42953	Missing	Missing	Missing	Missing	Missing	Missing	Missing	Missing
Pc1076	2	2.15049	Missing	Missing	Missing	Missing	Missing	Missing	Missing	Missing
Pc1077	2	0.47074	Missing	Missing	Missing	Missing	Missing	Missing	Missing	Missing
Pc1078	2	0.170042	Missing	Missing	Missing	Missing	Missing	Missing	Missing	Missing
Pc1079	3	0.665166	Missing	Missing	Missing	Missing	Missing	Missing	Missing	Missing
Pc1081	2	2.92514	Missing	Missing	Missing	Missing	Missing	Missing	Missing	Missing
Pc1082	3	2.24848	Missing	Missing	Missing	Missing	Missing	Missing	Missing	Missing
Pc1083	2	3.54264	Missing	Missing	Missing	Missing	Missing	Missing	Missing	Missing
Pc1084	2	1.48257	Missing	Missing	Missing	Missing	Missing	Missing	Missing	Missing
Pc1086	2	1.42754	Missing	Missing	Missing	Missing	Missing	Missing	Missing	Missing
Pc1087	2	2.64118	Missing	Missing	Missing	Missing	Missing	Missing	Missing	Missing
Pc1088	2	0.660579	Missing	Missing	Missing	Missing	Missing	Missing	Missing	Missing
Pc1089	2	2.11849	Missing	Missing	Missing	Missing	Missing	Missing	Missing	Missing
Pc1090	2	1.71117	Missing	Missing	Missing	Missing	Missing	Missing	Missing	Missing
Pc1092	3	1.31024	Missing	Missing	Missing	Missing	Missing	Missing	Missing	Missing
Pc1093	2	1.8481	Missing	Missing	Missing	Missing	Missing	Missing	Missing	Missing
Pc1094	2	0.165802	Missing	Missing	Missing	Missing	Missing	Missing	Missing	Missing
Pc1097	2	1.87507	Missing	Missing	Missing	Missing	Missing	Missing	Missing	Missing
Pc1098	2	1.46269	Missing	Missing	Missing	Missing	Missing	Missing	Missing	Missing
Pc1099	2	1.75955	Missing	Missing	Missing	Missing	Missing	Missing	Missing	Missing
Pc1100	2	1.51095	Missing	Missing	Missing	Missing	Missing	Missing	Missing	Missing
Pc1101	2	1.9444	Missing	Missing	Missing	Missing	Missing	Missing	Missing	Missing
Pc1102	2	2.50068	Missing	Missing	Missing	Missing	Missing	Missing	Missing	Missing
Pc1104	2	2.83192	Missing	Missing	Missing	Missing	Missing	Missing	Missing	Missing
Pc1106	2	2.5695	Missing	Missing	Missing	Missing	Missing	Missing	Missing	Missing
Pc1107	2	1.65264	Missing	Missing	Missing	Missing	Missing	Missing	Missing	Missing
Pc1109	3	0.275654	Missing	Missing	Missing	Missing	Missing	Missing	Missing	Missing
Pc1111	2	2.06624	Missing	Missing	Missing	Missing	Missing	Missing	Missing	Missing
Pc1112	2	0.530826	Missing	Missing	Missing	Missing	Missing	Missing	Missing	Missing
Pc1113	2	2.63062	Missing	Missing	Missing	Missing	Missing	Missing	Missing	Missing
Pc1114	2	2.71856	Missing	Missing	Missing	Missing	Missing	Missing	Missing	Missing
Pc1115	2	3.8023	Missing	Missing	Missing	Missing	Missing	Missing	Missing	Missing
Pc1116	2	1.32517	Missing	Missing	Missing	Missing	Missing	Missing	Missing	Missing
Pc1117	2	1.45521	Missing	Missing	Missing	Missing	Missing	Missing	Missing	Missing
Pc1118	Missing	Missing	2	1.30944	Missing	Missing	Missing	Missing	Missing	Missing
Pc1119	Missing	Missing	47	0.0963146	Missing	Missing	Missing	Missing	Missing	Missing
Pc1120	Missing	Missing	7	2.15324	Missing	Missing	Missing	Missing	Missing	Missing
Pc1121	Missing	Missing	3	2.06404	Missing	Missing	Missing	Missing	Missing	Missing
Pc1122	Missing	Missing	34	0.088085	Missing	Missing	Missing	Missing	Missing	Missing
Pc1124	Missing	Missing	2	1.07393	Missing	Missing	Missing	Missing	Missing	Missing
Pc1125	Missing	Missing	4	0.962575	Missing	Missing	Missing	Missing	Missing	Missing
Pc1126	Missing	Missing	2	1.06726	Missing	Missing	Missing	Missing	Missing	Missing
Pc1128	Missing	Missing	2	0.930929	Missing	Missing	Missing	Missing	Missing	Missing
Pc1129	Missing	Missing	2	1.22825	Missing	Missing	Missing	Missing	Missing	Missing
Pc1130	Missing	Missing	2	1.82754	Missing	Missing	Missing	Missing	Missing	Missing
Pc1131	Missing	Missing	2	1.65677	Missing	Missing	Missing	Missing	Missing	Missing
Pc1132	Missing	Missing	4	1.2679	Missing	Missing	Missing	Missing	Missing	Missing
Pc1133	Missing	Missing	3	2.3642	Missing	Missing	Missing	Missing	Missing	Missing
Pc1134	Missing	Missing	7	0.666599	Missing	Missing	Missing	Missing	Missing	Missing
Pc1135	Missing	Missing	2	2.92205	Missing	Missing	Missing	Missing	Missing	Missing
Pc1136	Missing	Missing	2	1.17058	Missing	Missing	Missing	Missing	Missing	Missing
Pc1137	Missing	Missing	2	0.858395	Missing	Missing	Missing	Missing	Missing	Missing
Pc1139	Missing	Missing	2	1.8798	Missing	Missing	Missing	Missing	Missing	Missing
Pc1140	Missing	Missing	2	1.90163	Missing	Missing	Missing	Missing	Missing	Missing
Pc1141	Missing	Missing	3	1.81748	Missing	Missing	Missing	Missing	Missing	Missing
Pc1142	Missing	Missing	3	0.832505	Missing	Missing	Missing	Missing	Missing	Missing
Pc1143	Missing	Missing	2	1.28432	Missing	Missing	Missing	Missing	Missing	Missing
Pc1144	Missing	Missing	2	2.38641	Missing	Missing	Missing	Missing	Missing	Missing
Pc1147	Missing	Missing	5	0.963959	Missing	Missing	Missing	Missing	Missing	Missing
Pc1148	Missing	Missing	2	1.23626	Missing	Missing	Missing	Missing	Missing	Missing
Pc1150	Missing	Missing	2	0.735365	Missing	Missing	Missing	Missing	Missing	Missing
Pc1151	Missing	Missing	2	2.65901	Missing	Missing	Missing	Missing	Missing	Missing
Pc1152	Missing	Missing	4	0.29492	Missing	Missing	Missing	Missing	Missing	Missing
Pc1153	Missing	Missing	2	0.625197	Missing	Missing	Missing	Missing	Missing	Missing
Pc1154	Missing	Missing	2	0.844478	Missing	Missing	Missing	Missing	Missing	Missing
Pc1155	Missing	Missing	2	0.942307	Missing	Missing	Missing	Missing	Missing	Missing
Pc1156	Missing	Missing	2	2.26099	Missing	Missing	Missing	Missing	Missing	Missing
Pc1157	Missing	Missing	2	1.34222	Missing	Missing	Missing	Missing	Missing	Missing
Pc1159	Missing	Missing	2	0.776767	Missing	Missing	Missing	Missing	Missing	Missing
Pc1160	Missing	Missing	2	0.56759	Missing	Missing	Missing	Missing	Missing	Missing
Pc1161	Missing	Missing	2	0.658816	Missing	Missing	Missing	Missing	Missing	Missing
Pc1162	Missing	Missing	2	2.17494	Missing	Missing	Missing	Missing	Missing	Missing
Pc1163	Missing	Missing	2	0.218741	Missing	Missing	Missing	Missing	Missing	Missing
Pc1165	Missing	Missing	2	0.539767	Missing	Missing	Missing	Missing	Missing	Missing
Pc1166	Missing	Missing	2	1.06157	Missing	Missing	Missing	Missing	Missing	Missing

## Sheet: Supplementary Table  8
Supplementary Table 8. Summary of gypsy-LTR-retrotransposons identified in perennial Glycine species.
ID	G. falcata		G. stenophita		G. cyrtoloba		G. syndetika		G. tomentella D3
	Family sizes	Insertion times (MYA)	Family sizes	Insertion times (MYA)	Family sizes	Insertion times (MYA)	Family sizes	Insertion times (MYA)	Family sizes	Insertion times (MYA)
Pg1	2582	0.576554	423	0.281404	1831	0.4721	312	0.322075	578	0.386051
Pg2	Missing	Missing	62	0.176002	1021	0.638894	255	0.291294	37	1.30605
Pg3	Missing	Missing	Missing	Missing	Missing	Missing	668	0.0397573	Missing	Missing
Pg4	Missing	Missing	Missing	Missing	Missing	Missing	24	0.993592	479	0.713101
Pg5	2017	0.687029	217	0.790598	496	0.674165	318	0.768111	147	0.932733
Pg6	Missing	Missing	942	0.762759	5	2.56072	565	0.861201	97	1.26263
Pg7	Missing	Missing	Missing	Missing	Missing	Missing	8	0.0415261	Missing	Missing
Pg9	36	1.02104	19	1.0166	8	1.83189	42	0.985001	48	0.753588
Pg10	61	0.540192	31	0.140154	33	0.252426	103	0.207853	24	0.271252
Pg11	1974	0.365287	993	0.240411	39	0.0829412	596	0.354965	775	0.412493
Pg12	Missing	Missing	Missing	Missing	Missing	Missing	Missing	Missing	2	0.512256
Pg13	Missing	Missing	15	0.638327	Missing	Missing	5	0.928249	3	0.571697
Pg14	2	1.86196	21	1.17387	40	1.24074	42	0.827027	53	0.758679
Pg16	Missing	Missing	Missing	Missing	Missing	Missing	Missing	Missing	2	1.22805
Pg17	Missing	Missing	Missing	Missing	Missing	Missing	12	0.0379901	Missing	Missing
Pg18	Missing	Missing	115	0.338923	Missing	Missing	184	1.10437	Missing	Missing
Pg19	Missing	Missing	Missing	Missing	Missing	Missing	Missing	Missing	35	0.179578
Pg20	90	1.60255	157	1.58922	168	1.41299	17	1.7908	296	1.1812
Pg21	84	0.176847	Missing	Missing	Missing	Missing	32	0.542482	Missing	Missing
Pg22	Missing	Missing	Missing	Missing	Missing	Missing	Missing	Missing	13	0.752979
Pg23	Missing	Missing	Missing	Missing	Missing	Missing	2	1.10443	Missing	Missing
Pg24	Missing	Missing	31	0.112694	Missing	Missing	Missing	Missing	152	0.103524
Pg25	Missing	Missing	Missing	Missing	Missing	Missing	3	2.01717	Missing	Missing
Pg26	Missing	Missing	Missing	Missing	Missing	Missing	Missing	Missing	54	0.306825
Pg27	202	0.262551	37	0.319755	34	1.00232	96	0.48868	19	0.554557
Pg28	Missing	Missing	3	2.40048	Missing	Missing	Missing	Missing	Missing	Missing
Pg29	Missing	Missing	Missing	Missing	Missing	Missing	Missing	Missing	7	0.024396
Pg30	Missing	Missing	Missing	Missing	Missing	Missing	12	0.0304324	Missing	Missing
Pg31	Missing	Missing	2	2.34526	Missing	Missing	Missing	Missing	5	1.30593
Pg32	90	1.46116	65	0.556352	78	0.565022	99	0.523821	70	0.539053
Pg33	Missing	Missing	Missing	Missing	Missing	Missing	17	0.890048	58	0.472233
Pg34	Missing	Missing	Missing	Missing	Missing	Missing	2	0.995416	4	0.322634
Pg35	Missing	Missing	Missing	Missing	Missing	Missing	Missing	Missing	3	0.0255118
Pg37	Missing	Missing	Missing	Missing	Missing	Missing	Missing	Missing	32	0.0629721
Pg38	Missing	Missing	Missing	Missing	Missing	Missing	Missing	Missing	7	0.749073
Pg39	Missing	Missing	Missing	Missing	Missing	Missing	Missing	Missing	6	1.49047
Pg40	Missing	Missing	Missing	Missing	Missing	Missing	Missing	Missing	2	1.35303
Pg42	Missing	Missing	Missing	Missing	Missing	Missing	121	0.107652	Missing	Missing
Pg43	Missing	Missing	Missing	Missing	Missing	Missing	Missing	Missing	3	0.921063
Pg44	23	1.15662	30	0.436481	4	1.53114	52	0.727948	16	1.14096
Pg45	Missing	Missing	Missing	Missing	Missing	Missing	Missing	Missing	4	1.92623
Pg46	20	0.274627	Missing	Missing	Missing	Missing	98	0.184058	15	0.743578
Pg47	Missing	Missing	99	0.685574	Missing	Missing	40	0.704427	38	0.997228
Pg49	Missing	Missing	Missing	Missing	Missing	Missing	71	0.121058	Missing	Missing
Pg51	1445	0.869733	198	1.07482	1447	0.837831	72	1.07433	92	1.1159
Pg52	Missing	Missing	Missing	Missing	4	0.52759	7	0.744195	2	0.748375
Pg53	Missing	Missing	6	0.370877	Missing	Missing	33	0.907095	39	0.854654
Pg55	Missing	Missing	Missing	Missing	Missing	Missing	18	0.367781	Missing	Missing
Pg56	Missing	Missing	18	1.9498	Missing	Missing	12	2.27667	Missing	Missing
Pg57	Missing	Missing	Missing	Missing	Missing	Missing	119	1.43856	2	1.04389
Pg59	314	0.179201	28	0.0451427	Missing	Missing	120	0.214756	Missing	Missing
Pg60	Missing	Missing	Missing	Missing	Missing	Missing	Missing	Missing	2	0.584832
Pg61	Missing	Missing	Missing	Missing	Missing	Missing	88	0.100523	18	0.264129
Pg62	Missing	Missing	Missing	Missing	Missing	Missing	2	0.0245775	Missing	Missing
Pg63	Missing	Missing	Missing	Missing	Missing	Missing	Missing	Missing	8	0.178311
Pg64	Missing	Missing	Missing	Missing	Missing	Missing	16	2.18717	Missing	Missing
Pg65	Missing	Missing	Missing	Missing	Missing	Missing	Missing	Missing	18	0.829213
Pg66	58	0.771638	18	1.08641	53	0.933113	20	1.21844	22	1.17923
Pg67	Missing	Missing	Missing	Missing	Missing	Missing	Missing	Missing	32	2.01441
Pg69	Missing	Missing	Missing	Missing	Missing	Missing	4	0.422089	4	0.236263
Pg70	Missing	Missing	Missing	Missing	Missing	Missing	Missing	Missing	29	1.17342
Pg71	Missing	Missing	Missing	Missing	Missing	Missing	Missing	Missing	2	1.51533
Pg72	Missing	Missing	Missing	Missing	Missing	Missing	9	0.226204	Missing	Missing
Pg74	Missing	Missing	Missing	Missing	Missing	Missing	21	0.0780914	Missing	Missing
Pg75	Missing	Missing	Missing	Missing	Missing	Missing	2	0.254126	Missing	Missing
Pg76	Missing	Missing	Missing	Missing	Missing	Missing	8	0.108724	6	0.0638731
Pg77	Missing	Missing	Missing	Missing	Missing	Missing	Missing	Missing	3	0.0157203
Pg78	Missing	Missing	Missing	Missing	Missing	Missing	62	0.208479	Missing	Missing
Pg79	Missing	Missing	Missing	Missing	Missing	Missing	5	0.126599	39	0.273138
Pg80	Missing	Missing	Missing	Missing	Missing	Missing	2	0.85811	2	0.975172
Pg82	Missing	Missing	Missing	Missing	Missing	Missing	3	0.161486	Missing	Missing
Pg83	Missing	Missing	Missing	Missing	Missing	Missing	Missing	Missing	32	0.795268
Pg84	Missing	Missing	Missing	Missing	Missing	Missing	2	0.361124	7	0.82594
Pg86	Missing	Missing	Missing	Missing	Missing	Missing	3	2.16265	Missing	Missing
Pg88	30	0.906641	9	0.597386	Missing	Missing	16	0.486311	11	1.35846
Pg89	Missing	Missing	25	0.643883	9	1.36004	27	0.285468	9	0.658304
Pg90	31	2.41263	16	1.36229	2	2.85953	18	2.01295	10	2.19819
Pg91	Missing	Missing	Missing	Missing	Missing	Missing	3	0.0445319	Missing	Missing
Pg92	Missing	Missing	52	1.43277	Missing	Missing	11	2.11606	4	1.93132
Pg95	Missing	Missing	Missing	Missing	Missing	Missing	Missing	Missing	3	0.0487344
Pg96	Missing	Missing	45	1.99862	Missing	Missing	32	2.27805	35	1.96211
Pg97	17	1.04172	25	0.790563	6	1.84222	2	1.32363	2	2.28061
Pg99	Missing	Missing	Missing	Missing	Missing	Missing	4	0.210337	3	1.0238
Pg100	2	2.0912	3	1.02967	3	0.787278	7	0.718972	Missing	Missing
Pg101	Missing	Missing	Missing	Missing	Missing	Missing	Missing	Missing	2	1.67067
Pg104	Missing	Missing	Missing	Missing	Missing	Missing	48	0.0721196	Missing	Missing
Pg105	43	0.13815	13	0.121354	Missing	Missing	24	0.145782	51	0.227403
Pg106	Missing	Missing	Missing	Missing	Missing	Missing	Missing	Missing	2	2.06275
Pg107	Missing	Missing	Missing	Missing	Missing	Missing	Missing	Missing	4	1.45993
Pg110	Missing	Missing	Missing	Missing	Missing	Missing	Missing	Missing	3	0.90327
Pg111	Missing	Missing	Missing	Missing	Missing	Missing	Missing	Missing	48	0.15438
Pg112	Missing	Missing	Missing	Missing	Missing	Missing	Missing	Missing	2	1.41016
Pg113	Missing	Missing	Missing	Missing	Missing	Missing	Missing	Missing	3	0.561891
Pg114	Missing	Missing	2	1.23747	Missing	Missing	Missing	Missing	Missing	Missing
Pg115	Missing	Missing	Missing	Missing	Missing	Missing	3	0.384237	4	0.688973
Pg118	Missing	Missing	Missing	Missing	Missing	Missing	2	0.44316	4	0.432114
Pg119	Missing	Missing	Missing	Missing	Missing	Missing	10	0.0485358	Missing	Missing
Pg120	Missing	Missing	Missing	Missing	Missing	Missing	2	3.14249	Missing	Missing
Pg121	3	1.55769	Missing	Missing	Missing	Missing	Missing	Missing	Missing	Missing
Pg122	Missing	Missing	Missing	Missing	Missing	Missing	Missing	Missing	2	0.930026
Pg124	Missing	Missing	Missing	Missing	Missing	Missing	Missing	Missing	25	0.403257
Pg125	Missing	Missing	3	2.75127	Missing	Missing	Missing	Missing	Missing	Missing
Pg126	Missing	Missing	Missing	Missing	Missing	Missing	8	0.0821953	Missing	Missing
Pg127	91	0.553951	7	0.238353	43	0.698339	18	0.829732	24	0.644278
Pg128	Missing	Missing	Missing	Missing	Missing	Missing	3	0.819707	Missing	Missing
Pg129	83	1.64571	68	0.684682	16	1.72991	18	1.64219	46	1.20658
Pg130	Missing	Missing	Missing	Missing	Missing	Missing	2	0.298822	Missing	Missing
Pg133	Missing	Missing	34	2.36372	Missing	Missing	2	3.26896	4	3.20908
Pg135	5	0.367216	4	1.25312	5	1.67826	3	0.648237	3	0.835551
Pg136	Missing	Missing	2	1.29661	2	2.29877	3	1.31721	Missing	Missing
Pg142	Missing	Missing	Missing	Missing	Missing	Missing	Missing	Missing	2	1.7009
Pg143	Missing	Missing	Missing	Missing	Missing	Missing	7	0.45315	Missing	Missing
Pg144	Missing	Missing	Missing	Missing	Missing	Missing	3	1.26538	2	1.53894
Pg147	Missing	Missing	Missing	Missing	Missing	Missing	7	0.743149	Missing	Missing
Pg148	Missing	Missing	Missing	Missing	Missing	Missing	2	0.0437265	Missing	Missing
Pg149	Missing	Missing	Missing	Missing	Missing	Missing	Missing	Missing	8	0.149308
Pg150	Missing	Missing	Missing	Missing	Missing	Missing	7	0.6346	14	0.858926
Pg152	Missing	Missing	Missing	Missing	Missing	Missing	2	0.906645	Missing	Missing
Pg155	Missing	Missing	Missing	Missing	4	0.174202	34	0.27852	Missing	Missing
Pg156	Missing	Missing	3	0.403777	Missing	Missing	13	0.431036	Missing	Missing
Pg157	Missing	Missing	2	0.819013	Missing	Missing	2	0.481308	2	0.798896
Pg159	Missing	Missing	Missing	Missing	Missing	Missing	2	0.156829	Missing	Missing
Pg161	Missing	Missing	Missing	Missing	Missing	Missing	3	1.62683	Missing	Missing
Pg162	Missing	Missing	Missing	Missing	Missing	Missing	2	0.234153	Missing	Missing
Pg163	Missing	Missing	Missing	Missing	Missing	Missing	Missing	Missing	12	0.0597287
Pg164	Missing	Missing	Missing	Missing	Missing	Missing	6	0.510071	Missing	Missing
Pg165	35	0.922588	8	0.333254	12	0.552124	9	0.633489	5	0.976217
Pg169	Missing	Missing	Missing	Missing	Missing	Missing	Missing	Missing	2	0.842297
Pg170	Missing	Missing	Missing	Missing	Missing	Missing	2	1.60519	Missing	Missing
Pg171	Missing	Missing	Missing	Missing	Missing	Missing	6	0.0406996	Missing	Missing
Pg172	Missing	Missing	Missing	Missing	Missing	Missing	Missing	Missing	3	4.5621
Pg173	Missing	Missing	Missing	Missing	Missing	Missing	Missing	Missing	6	2.93277
Pg174	Missing	Missing	Missing	Missing	Missing	Missing	6	0.0869292	Missing	Missing
Pg175	Missing	Missing	Missing	Missing	Missing	Missing	4	0.446371	15	0.658119
Pg178	Missing	Missing	Missing	Missing	Missing	Missing	4	0.0535412	Missing	Missing
Pg180	10	1.84385	10	1.73148	15	1.44837	13	1.48984	7	2.10277
Pg181	Missing	Missing	Missing	Missing	Missing	Missing	5	0.498303	16	0.471459
Pg184	Missing	Missing	Missing	Missing	Missing	Missing	6	0.378128	Missing	Missing
Pg186	Missing	Missing	Missing	Missing	Missing	Missing	Missing	Missing	7	0.446741
Pg187	Missing	Missing	Missing	Missing	Missing	Missing	Missing	Missing	14	0.0747479
Pg190	Missing	Missing	Missing	Missing	Missing	Missing	11	0.0702991	Missing	Missing
Pg191	Missing	Missing	24	2.0358	4	2.53057	12	2.82393	9	2.99904
Pg192	Missing	Missing	Missing	Missing	Missing	Missing	7	0.0393001	Missing	Missing
Pg193	Missing	Missing	Missing	Missing	Missing	Missing	Missing	Missing	3	0.0281015
Pg195	Missing	Missing	Missing	Missing	Missing	Missing	7	0.156813	Missing	Missing
Pg196	Missing	Missing	Missing	Missing	Missing	Missing	Missing	Missing	2	0.813711
Pg197	Missing	Missing	Missing	Missing	Missing	Missing	10	0.0472354	Missing	Missing
Pg198	Missing	Missing	Missing	Missing	Missing	Missing	13	0.0682125	Missing	Missing
Pg200	8	0.692806	2	0.163977	Missing	Missing	10	0.526088	Missing	Missing
Pg201	16	0.928848	12	0.501708	Missing	Missing	5	0.49033	Missing	Missing
Pg202	Missing	Missing	Missing	Missing	Missing	Missing	Missing	Missing	4	0.566837
Pg203	Missing	Missing	Missing	Missing	Missing	Missing	Missing	Missing	4	0.364282
Pg204	Missing	Missing	Missing	Missing	Missing	Missing	Missing	Missing	2	0.268983
Pg206	2	2.23617	2	1.05336	Missing	Missing	Missing	Missing	5	0.932333
Pg208	Missing	Missing	Missing	Missing	Missing	Missing	Missing	Missing	2	1.33268
Pg211	Missing	Missing	Missing	Missing	Missing	Missing	2	0.115006	Missing	Missing
Pg212	Missing	Missing	Missing	Missing	Missing	Missing	2	0.577082	Missing	Missing
Pg215	Missing	Missing	Missing	Missing	Missing	Missing	2	1.56172	Missing	Missing
Pg216	Missing	Missing	Missing	Missing	Missing	Missing	Missing	Missing	3	1.94512
Pg221	54	1.58568	212	1.00277	63	1.5801	24	0.877303	9	1.50207
Pg223	Missing	Missing	Missing	Missing	Missing	Missing	2	0.242855	Missing	Missing
Pg230	Missing	Missing	Missing	Missing	Missing	Missing	Missing	Missing	6	1.89074
Pg231	Missing	Missing	Missing	Missing	Missing	Missing	2	0.461957	Missing	Missing
Pg234	Missing	Missing	Missing	Missing	Missing	Missing	4	0.995172	6	1.14277
Pg235	Missing	Missing	Missing	Missing	Missing	Missing	2	0.596362	Missing	Missing
Pg236	Missing	Missing	Missing	Missing	Missing	Missing	Missing	Missing	2	1.167
Pg237	Missing	Missing	Missing	Missing	Missing	Missing	2	0.0696081	Missing	Missing
Pg241	Missing	Missing	Missing	Missing	Missing	Missing	3	0.0518047	Missing	Missing
Pg242	8	1.50475	Missing	Missing	13	2.38242	4	1.40864	17	0.983988
Pg244	Missing	Missing	4	0.884397	Missing	Missing	11	0.909612	16	0.760391
Pg248	Missing	Missing	43	0.332064	Missing	Missing	9	0.498276	3	1.21758
Pg249	Missing	Missing	61	0.290216	Missing	Missing	2	0.0589881	Missing	Missing
Pg250	Missing	Missing	Missing	Missing	Missing	Missing	16	3.66057	Missing	Missing
Pg253	Missing	Missing	Missing	Missing	Missing	Missing	2	0.829357	Missing	Missing
Pg256	Missing	Missing	Missing	Missing	Missing	Missing	4	0.0656214	Missing	Missing
Pg258	Missing	Missing	Missing	Missing	Missing	Missing	2	0.577442	Missing	Missing
Pg260	Missing	Missing	Missing	Missing	Missing	Missing	Missing	Missing	9	1.13113
Pg262	Missing	Missing	Missing	Missing	Missing	Missing	37	0.659892	Missing	Missing
Pg263	Missing	Missing	Missing	Missing	Missing	Missing	Missing	Missing	2	0.0829212
Pg265	Missing	Missing	Missing	Missing	Missing	Missing	8	1.06611	Missing	Missing
Pg269	Missing	Missing	Missing	Missing	Missing	Missing	4	0.358291	Missing	Missing
Pg270	Missing	Missing	Missing	Missing	Missing	Missing	Missing	Missing	2	0.152947
Pg274	Missing	Missing	Missing	Missing	Missing	Missing	7	2.18731	Missing	Missing
Pg278	Missing	Missing	Missing	Missing	Missing	Missing	Missing	Missing	6	0.172872
Pg279	Missing	Missing	Missing	Missing	Missing	Missing	Missing	Missing	7	0.040661
Pg280	Missing	Missing	Missing	Missing	Missing	Missing	Missing	Missing	2	0.754683
Pg282	Missing	Missing	Missing	Missing	Missing	Missing	3	2.68612	Missing	Missing
Pg284	Missing	Missing	Missing	Missing	Missing	Missing	2	1.73168	Missing	Missing
Pg286	Missing	Missing	Missing	Missing	Missing	Missing	9	0.267409	Missing	Missing
Pg287	Missing	Missing	10	1.95046	Missing	Missing	4	2.54268	Missing	Missing
Pg288	Missing	Missing	4	1.85896	4	0.596721	3	0.698073	6	0.948821
Pg289	Missing	Missing	3	1.56655	Missing	Missing	3	1.302	Missing	Missing
Pg290	Missing	Missing	4	0.884629	Missing	Missing	Missing	Missing	Missing	Missing
Pg293	Missing	Missing	Missing	Missing	Missing	Missing	Missing	Missing	2	0.35783
Pg294	Missing	Missing	Missing	Missing	Missing	Missing	21	0.143831	Missing	Missing
Pg296	Missing	Missing	Missing	Missing	Missing	Missing	Missing	Missing	4	0.193353
Pg297	Missing	Missing	Missing	Missing	Missing	Missing	2	0.0184917	Missing	Missing
Pg299	Missing	Missing	Missing	Missing	Missing	Missing	Missing	Missing	3	0.0117824
Pg300	Missing	Missing	8	0.469784	Missing	Missing	Missing	Missing	3	0.585752
Pg301	Missing	Missing	Missing	Missing	Missing	Missing	Missing	Missing	3	0.308874
Pg307	Missing	Missing	2	0.22314	Missing	Missing	7	0.237162	Missing	Missing
Pg309	Missing	Missing	Missing	Missing	Missing	Missing	5	0.152386	Missing	Missing
Pg313	Missing	Missing	Missing	Missing	Missing	Missing	2	1.04563	3	0.833196
Pg315	Missing	Missing	Missing	Missing	Missing	Missing	2	2.06595	2	1.41496
Pg319	Missing	Missing	Missing	Missing	Missing	Missing	Missing	Missing	2	0.757425
Pg320	Missing	Missing	Missing	Missing	Missing	Missing	2	0.634793	Missing	Missing
Pg324	Missing	Missing	Missing	Missing	Missing	Missing	Missing	Missing	2	0.653349
Pg325	Missing	Missing	Missing	Missing	Missing	Missing	9	0.06853	Missing	Missing
Pg327	Missing	Missing	Missing	Missing	Missing	Missing	Missing	Missing	3	0.918677
Pg328	Missing	Missing	Missing	Missing	Missing	Missing	Missing	Missing	32	0.0635204
Pg329	Missing	Missing	Missing	Missing	Missing	Missing	5	0.150724	Missing	Missing
Pg331	Missing	Missing	Missing	Missing	Missing	Missing	Missing	Missing	2	0.790819
Pg333	Missing	Missing	4	0.343214	Missing	Missing	Missing	Missing	5	1.12127
Pg334	Missing	Missing	Missing	Missing	Missing	Missing	2	0.436627	Missing	Missing
Pg338	Missing	Missing	3	0.225457	2	0.0794046	8	0.210226	9	0.203492
Pg342	Missing	Missing	Missing	Missing	Missing	Missing	9	0.182888	Missing	Missing
Pg344	Missing	Missing	Missing	Missing	Missing	Missing	2	0.275265	Missing	Missing
Pg345	Missing	Missing	Missing	Missing	Missing	Missing	Missing	Missing	2	0.127728
Pg347	Missing	Missing	2	0.920203	Missing	Missing	Missing	Missing	2	1.2521
Pg349	Missing	Missing	Missing	Missing	Missing	Missing	12	1.64234	Missing	Missing
Pg350	Missing	Missing	Missing	Missing	Missing	Missing	20	0.375748	Missing	Missing
Pg351	Missing	Missing	Missing	Missing	Missing	Missing	3	0.646794	Missing	Missing
Pg352	Missing	Missing	Missing	Missing	Missing	Missing	Missing	Missing	16	0.583661
Pg353	Missing	Missing	Missing	Missing	Missing	Missing	Missing	Missing	2	0.472062
Pg354	Missing	Missing	Missing	Missing	Missing	Missing	5	0.069503	Missing	Missing
Pg356	Missing	Missing	Missing	Missing	Missing	Missing	2	2.64839	Missing	Missing
Pg358	Missing	Missing	Missing	Missing	Missing	Missing	33	0.0445685	Missing	Missing
Pg361	Missing	Missing	Missing	Missing	Missing	Missing	Missing	Missing	3	0.0131323
Pg362	Missing	Missing	Missing	Missing	Missing	Missing	Missing	Missing	5	0.295251
Pg363	Missing	Missing	Missing	Missing	Missing	Missing	Missing	Missing	3	0.840891
Pg366	Missing	Missing	Missing	Missing	Missing	Missing	Missing	Missing	6	0.252925
Pg372	Missing	Missing	Missing	Missing	Missing	Missing	5	0.52388	Missing	Missing
Pg374	Missing	Missing	Missing	Missing	Missing	Missing	5	0.693539	Missing	Missing
Pg377	Missing	Missing	Missing	Missing	Missing	Missing	8	0.799946	Missing	Missing
Pg382	Missing	Missing	Missing	Missing	Missing	Missing	3	0.381844	Missing	Missing
Pg384	Missing	Missing	Missing	Missing	Missing	Missing	3	2.77608	Missing	Missing
Pg386	Missing	Missing	Missing	Missing	Missing	Missing	2	0.0512527	Missing	Missing
Pg387	2	0.31981	Missing	Missing	Missing	Missing	Missing	Missing	Missing	Missing
Pg390	Missing	Missing	Missing	Missing	Missing	Missing	Missing	Missing	3	1.06225
Pg392	Missing	Missing	Missing	Missing	Missing	Missing	2	1.41316	Missing	Missing
Pg393	Missing	Missing	Missing	Missing	Missing	Missing	Missing	Missing	2	0.217391
Pg394	Missing	Missing	Missing	Missing	Missing	Missing	3	0.0185469	Missing	Missing
Pg395	Missing	Missing	Missing	Missing	Missing	Missing	2	0.0528273	Missing	Missing
Pg397	Missing	Missing	Missing	Missing	Missing	Missing	7	0.232914	Missing	Missing
Pg398	Missing	Missing	Missing	Missing	Missing	Missing	3	2.41872	Missing	Missing
Pg399	Missing	Missing	Missing	Missing	Missing	Missing	Missing	Missing	3	0.493666
Pg402	Missing	Missing	Missing	Missing	Missing	Missing	15	0.035699	Missing	Missing
Pg407	Missing	Missing	Missing	Missing	Missing	Missing	2	1.60589	Missing	Missing
Pg408	13	0.916496	Missing	Missing	4	0.651892	4	0.502003	Missing	Missing
Pg413	Missing	Missing	Missing	Missing	Missing	Missing	2	0.890964	Missing	Missing
Pg414	Missing	Missing	Missing	Missing	Missing	Missing	2	0.120728	Missing	Missing
Pg424	Missing	Missing	Missing	Missing	Missing	Missing	Missing	Missing	2	0.0846681
Pg425	Missing	Missing	7	0.181384	Missing	Missing	5	0.202181	Missing	Missing
Pg427	2	1.37546	5	0.854376	Missing	Missing	6	1.12467	Missing	Missing
Pg431	Missing	Missing	Missing	Missing	6	0.383557	3	1.16309	2	1.89681
Pg434	Missing	Missing	Missing	Missing	Missing	Missing	Missing	Missing	4	0.176537
Pg435	Missing	Missing	Missing	Missing	Missing	Missing	Missing	Missing	6	0.0870592
Pg438	Missing	Missing	Missing	Missing	Missing	Missing	2	0.933456	Missing	Missing
Pg443	Missing	Missing	Missing	Missing	Missing	Missing	6	0.0322226	Missing	Missing
Pg445	Missing	Missing	Missing	Missing	Missing	Missing	5	0.132356	Missing	Missing
Pg446	Missing	Missing	Missing	Missing	Missing	Missing	2	0.352554	Missing	Missing
Pg447	Missing	Missing	Missing	Missing	Missing	Missing	Missing	Missing	2	2.22128
Pg453	Missing	Missing	Missing	Missing	Missing	Missing	12	0.333851	Missing	Missing
Pg454	Missing	Missing	Missing	Missing	Missing	Missing	Missing	Missing	4	0.0164182
Pg457	Missing	Missing	Missing	Missing	Missing	Missing	Missing	Missing	5	0.181484
Pg462	Missing	Missing	Missing	Missing	Missing	Missing	3	0.606824	Missing	Missing
Pg464	Missing	Missing	2	0.168747	Missing	Missing	Missing	Missing	2	1.37254
Pg470	Missing	Missing	4	2.34629	4	3.30612	3	3.31982	7	1.81589
Pg471	Missing	Missing	Missing	Missing	Missing	Missing	2	0.761632	Missing	Missing
Pg473	Missing	Missing	Missing	Missing	Missing	Missing	Missing	Missing	2	0.911758
Pg476	Missing	Missing	Missing	Missing	Missing	Missing	3	1.78022	Missing	Missing
Pg477	Missing	Missing	Missing	Missing	Missing	Missing	10	0.0847987	Missing	Missing
Pg481	Missing	Missing	Missing	Missing	Missing	Missing	Missing	Missing	3	0.647192
Pg482	Missing	Missing	Missing	Missing	Missing	Missing	Missing	Missing	2	0.498983
Pg484	Missing	Missing	Missing	Missing	Missing	Missing	13	1.01459	Missing	Missing
Pg487	Missing	Missing	Missing	Missing	Missing	Missing	2	0.870145	Missing	Missing
Pg488	Missing	Missing	Missing	Missing	Missing	Missing	Missing	Missing	4	0.431324
Pg491	Missing	Missing	2	0.545573	Missing	Missing	Missing	Missing	3	1.97862
Pg492	Missing	Missing	Missing	Missing	Missing	Missing	3	1.18105	Missing	Missing
Pg493	Missing	Missing	Missing	Missing	2	1.97729	Missing	Missing	2	1.18781
Pg494	Missing	Missing	Missing	Missing	Missing	Missing	5	0.0205917	Missing	Missing
Pg496	Missing	Missing	Missing	Missing	Missing	Missing	Missing	Missing	2	0.0818187
Pg498	Missing	Missing	2	0.377649	Missing	Missing	Missing	Missing	3	0.859263
Pg501	Missing	Missing	Missing	Missing	Missing	Missing	2	0.980276	Missing	Missing
Pg503	Missing	Missing	Missing	Missing	Missing	Missing	Missing	Missing	2	0.570129
Pg505	Missing	Missing	19	0.0739778	185	0.127959	4	0.186847	2	0.0911773
Pg507	Missing	Missing	Missing	Missing	Missing	Missing	3	0.305715	Missing	Missing
Pg508	Missing	Missing	Missing	Missing	Missing	Missing	2	0.181281	Missing	Missing
Pg511	Missing	Missing	Missing	Missing	Missing	Missing	Missing	Missing	3	0.626013
Pg512	Missing	Missing	Missing	Missing	Missing	Missing	2	0.0172256	Missing	Missing
Pg520	Missing	Missing	Missing	Missing	Missing	Missing	9	0.684193	Missing	Missing
Pg529	Missing	Missing	Missing	Missing	Missing	Missing	Missing	Missing	2	1.81091
Pg530	Missing	Missing	Missing	Missing	Missing	Missing	3	3.36748	Missing	Missing
Pg531	Missing	Missing	2	1.76031	Missing	Missing	2	2.46499	Missing	Missing
Pg534	Missing	Missing	Missing	Missing	Missing	Missing	Missing	Missing	3	0.301864
Pg538	Missing	Missing	Missing	Missing	Missing	Missing	Missing	Missing	2	1.04836
Pg541	Missing	Missing	Missing	Missing	Missing	Missing	3	0.106288	Missing	Missing
Pg542	Missing	Missing	Missing	Missing	Missing	Missing	Missing	Missing	2	2.33311
Pg543	Missing	Missing	Missing	Missing	Missing	Missing	Missing	Missing	2	0.496426
Pg544	Missing	Missing	Missing	Missing	Missing	Missing	2	0.0868215	Missing	Missing
Pg545	Missing	Missing	Missing	Missing	Missing	Missing	Missing	Missing	2	1.08993
Pg546	Missing	Missing	Missing	Missing	Missing	Missing	Missing	Missing	3	2.5281
Pg549	2	1.62565	3	1.24156	3	1.87704	Missing	Missing	Missing	Missing
Pg551	Missing	Missing	Missing	Missing	Missing	Missing	2	1.30911	Missing	Missing
Pg554	6	0.697064	2	0.212448	Missing	Missing	Missing	Missing	2	1.00484
Pg555	Missing	Missing	2	0.166816	Missing	Missing	2	0.324952	Missing	Missing
Pg565	9	0.707184	2	1.6315	2	0.541861	4	0.640785	5	0.751101
Pg566	2	0.129138	Missing	Missing	Missing	Missing	Missing	Missing	Missing	Missing
Pg568	Missing	Missing	Missing	Missing	Missing	Missing	2	0.478341	Missing	Missing
Pg570	Missing	Missing	Missing	Missing	Missing	Missing	3	0.0216218	Missing	Missing
Pg575	Missing	Missing	Missing	Missing	Missing	Missing	2	0.703618	Missing	Missing
Pg576	Missing	Missing	Missing	Missing	Missing	Missing	2	0.877863	Missing	Missing
Pg585	Missing	Missing	Missing	Missing	Missing	Missing	Missing	Missing	3	0.666408
Pg587	Missing	Missing	Missing	Missing	Missing	Missing	2	0.967001	Missing	Missing
Pg589	Missing	Missing	Missing	Missing	Missing	Missing	2	0.424569	Missing	Missing
Pg594	Missing	Missing	Missing	Missing	Missing	Missing	3	0.791807	Missing	Missing
Pg603	Missing	Missing	Missing	Missing	Missing	Missing	2	0.270982	Missing	Missing
Pg605	Missing	Missing	2	0.437901	Missing	Missing	2	0.892803	4	1.17063
Pg606	Missing	Missing	2	1.15007	Missing	Missing	Missing	Missing	7	1.43414
Pg608	Missing	Missing	Missing	Missing	Missing	Missing	Missing	Missing	2	0.56673
Pg610	Missing	Missing	Missing	Missing	Missing	Missing	Missing	Missing	2	1.20372
Pg614	Missing	Missing	Missing	Missing	Missing	Missing	Missing	Missing	2	1.57362
Pg617	Missing	Missing	Missing	Missing	Missing	Missing	Missing	Missing	4	1.72647
Pg619	Missing	Missing	Missing	Missing	Missing	Missing	2	0.262116	Missing	Missing
Pg625	Missing	Missing	Missing	Missing	3	0.0462573	Missing	Missing	Missing	Missing
Pg628	Missing	Missing	3	1.52617	2	2.21656	2	1.61648	Missing	Missing
Pg634	Missing	Missing	Missing	Missing	Missing	Missing	Missing	Missing	2	2.76757
Pg635	Missing	Missing	Missing	Missing	Missing	Missing	Missing	Missing	4	0.1979
Pg639	Missing	Missing	Missing	Missing	Missing	Missing	Missing	Missing	2	0.100608
Pg640	Missing	Missing	Missing	Missing	Missing	Missing	3	0.60992	2	0.321863
Pg644	Missing	Missing	Missing	Missing	Missing	Missing	Missing	Missing	3	0.059645
Pg649	Missing	Missing	Missing	Missing	Missing	Missing	2	2.66812	Missing	Missing
Pg650	Missing	Missing	Missing	Missing	Missing	Missing	Missing	Missing	2	2.86576
Pg653	Missing	Missing	3	0.347078	Missing	Missing	3	0.569862	Missing	Missing
Pg658	Missing	Missing	Missing	Missing	Missing	Missing	2	0.0493029	Missing	Missing
Pg665	Missing	Missing	Missing	Missing	Missing	Missing	Missing	Missing	6	0.483775
Pg666	Missing	Missing	Missing	Missing	Missing	Missing	5	0.107554	Missing	Missing
Pg667	Missing	Missing	Missing	Missing	Missing	Missing	2	0.0457279	Missing	Missing
Pg668	Missing	Missing	2	2.38214	Missing	Missing	Missing	Missing	Missing	Missing
Pg676	Missing	Missing	3	0.475015	Missing	Missing	3	0.220207	Missing	Missing
Pg678	2	1.30385	Missing	Missing	Missing	Missing	Missing	Missing	Missing	Missing
Pg681	Missing	Missing	Missing	Missing	Missing	Missing	3	0.893883	Missing	Missing
Pg689	6	2.44877	Missing	Missing	Missing	Missing	Missing	Missing	Missing	Missing
Pg691	Missing	Missing	2	0.294922	Missing	Missing	Missing	Missing	Missing	Missing
Pg697	Missing	Missing	Missing	Missing	Missing	Missing	2	1.57034	Missing	Missing
Pg698	Missing	Missing	Missing	Missing	Missing	Missing	3	0.331434	Missing	Missing
Pg700	Missing	Missing	8	0.191748	16	0.382797	3	0.256488	3	0.327651
Pg703	4	1.13558	Missing	Missing	Missing	Missing	6	0.845077	3	0.927219
Pg704	Missing	Missing	2	1.32133	Missing	Missing	3	0.696627	2	1.6597
Pg705	Missing	Missing	Missing	Missing	Missing	Missing	2	2.98985	Missing	Missing
Pg713	Missing	Missing	4	1.50485	Missing	Missing	Missing	Missing	Missing	Missing
Pg715	Missing	Missing	Missing	Missing	Missing	Missing	Missing	Missing	3	1.25411
Pg716	Missing	Missing	Missing	Missing	Missing	Missing	Missing	Missing	6	0.0625996
Pg718	Missing	Missing	17	1.29564	Missing	Missing	Missing	Missing	Missing	Missing
Pg728	Missing	Missing	Missing	Missing	Missing	Missing	3	0.77229	Missing	Missing
Pg730	Missing	Missing	Missing	Missing	Missing	Missing	2	0.139864	Missing	Missing
Pg732	11	1.26445	Missing	Missing	Missing	Missing	3	1.11523	3	1.80275
Pg733	Missing	Missing	Missing	Missing	Missing	Missing	2	0.831399	Missing	Missing
Pg734	Missing	Missing	2	1.46145	Missing	Missing	Missing	Missing	Missing	Missing
Pg739	Missing	Missing	Missing	Missing	3	1.55646	3	1.93227	Missing	Missing
Pg745	Missing	Missing	Missing	Missing	Missing	Missing	2	1.42553	Missing	Missing
Pg751	Missing	Missing	Missing	Missing	Missing	Missing	8	0.610801	Missing	Missing
Pg755	Missing	Missing	Missing	Missing	Missing	Missing	Missing	Missing	2	0.641468
Pg756	Missing	Missing	Missing	Missing	Missing	Missing	Missing	Missing	2	0.896979
Pg758	Missing	Missing	Missing	Missing	Missing	Missing	Missing	Missing	2	0.471926
Pg764	Missing	Missing	Missing	Missing	Missing	Missing	Missing	Missing	2	2.3394
Pg765	Missing	Missing	Missing	Missing	Missing	Missing	2	2.67123	Missing	Missing
Pg768	2	0.323806	Missing	Missing	Missing	Missing	Missing	Missing	Missing	Missing
Pg769	Missing	Missing	Missing	Missing	Missing	Missing	7	0.0478968	Missing	Missing
Pg770	Missing	Missing	Missing	Missing	Missing	Missing	3	0.442325	Missing	Missing
Pg771	Missing	Missing	Missing	Missing	Missing	Missing	5	0.08004	Missing	Missing
Pg773	Missing	Missing	Missing	Missing	Missing	Missing	Missing	Missing	2	0.161432
Pg775	Missing	Missing	Missing	Missing	Missing	Missing	3	0.407821	Missing	Missing
Pg776	Missing	Missing	Missing	Missing	Missing	Missing	4	0.739665	Missing	Missing
Pg784	Missing	Missing	Missing	Missing	Missing	Missing	Missing	Missing	2	1.37787
Pg785	4	0.47043	Missing	Missing	Missing	Missing	2	0.465372	Missing	Missing
Pg789	Missing	Missing	Missing	Missing	14	0.301034	2	0.12638	Missing	Missing
Pg791	Missing	Missing	Missing	Missing	Missing	Missing	3	0.0886933	Missing	Missing
Pg798	Missing	Missing	Missing	Missing	Missing	Missing	Missing	Missing	3	1.22211
Pg799	Missing	Missing	Missing	Missing	Missing	Missing	Missing	Missing	4	1.00851
Pg801	Missing	Missing	Missing	Missing	Missing	Missing	2	0.283127	Missing	Missing
Pg804	Missing	Missing	6	0.292356	Missing	Missing	Missing	Missing	2	0.59974
Pg805	Missing	Missing	2	0.580941	Missing	Missing	Missing	Missing	Missing	Missing
Pg811	Missing	Missing	Missing	Missing	Missing	Missing	4	0.0196476	Missing	Missing
Pg814	Missing	Missing	Missing	Missing	Missing	Missing	5	0.580351	Missing	Missing
Pg824	Missing	Missing	Missing	Missing	Missing	Missing	Missing	Missing	2	0.819321
Pg830	Missing	Missing	Missing	Missing	Missing	Missing	Missing	Missing	2	0.746702
Pg835	58	2.91226	Missing	Missing	Missing	Missing	2	2.56272	3	2.60773
Pg836	Missing	Missing	Missing	Missing	Missing	Missing	Missing	Missing	2	1.2306
Pg838	Missing	Missing	Missing	Missing	Missing	Missing	2	3.19373	Missing	Missing
Pg839	Missing	Missing	Missing	Missing	Missing	Missing	Missing	Missing	3	3.32248
Pg844	Missing	Missing	Missing	Missing	Missing	Missing	2	0.655873	Missing	Missing
Pg849	Missing	Missing	Missing	Missing	Missing	Missing	3	0.562253	Missing	Missing
Pg850	Missing	Missing	Missing	Missing	13	0.26801	Missing	Missing	Missing	Missing
Pg851	Missing	Missing	Missing	Missing	Missing	Missing	2	0.622106	Missing	Missing
Pg854	Missing	Missing	Missing	Missing	Missing	Missing	4	0.172164	Missing	Missing
Pg855	Missing	Missing	Missing	Missing	Missing	Missing	2	0.097154	Missing	Missing
Pg856	Missing	Missing	Missing	Missing	Missing	Missing	Missing	Missing	2	0.0258735
Pg859	Missing	Missing	Missing	Missing	Missing	Missing	2	0.431552	Missing	Missing
Pg860	Missing	Missing	Missing	Missing	Missing	Missing	4	0.0979795	Missing	Missing
Pg861	Missing	Missing	Missing	Missing	Missing	Missing	Missing	Missing	5	2.01729
Pg865	Missing	Missing	Missing	Missing	Missing	Missing	2	1.80451	Missing	Missing
Pg870	Missing	Missing	2	0.336304	Missing	Missing	Missing	Missing	Missing	Missing
Pg871	Missing	Missing	Missing	Missing	Missing	Missing	Missing	Missing	3	0.118849
Pg883	Missing	Missing	Missing	Missing	Missing	Missing	Missing	Missing	3	0.69965
Pg884	Missing	Missing	4	2.02052	Missing	Missing	5	2.00857	Missing	Missing
Pg891	Missing	Missing	4	1.56518	3	2.41919	Missing	Missing	2	1.32649
Pg896	Missing	Missing	3	0.733831	2	1.34885	2	2.1069	Missing	Missing
Pg897	Missing	Missing	Missing	Missing	Missing	Missing	Missing	Missing	6	1.37791
Pg905	Missing	Missing	Missing	Missing	Missing	Missing	3	0.315607	Missing	Missing
Pg914	Missing	Missing	Missing	Missing	Missing	Missing	Missing	Missing	2	0.561075
Pg918	Missing	Missing	Missing	Missing	Missing	Missing	Missing	Missing	2	0.893491
Pg919	Missing	Missing	Missing	Missing	Missing	Missing	Missing	Missing	2	3.16286
Pg920	Missing	Missing	Missing	Missing	Missing	Missing	2	1.5469	Missing	Missing
Pg925	Missing	Missing	Missing	Missing	Missing	Missing	2	0.0800812	Missing	Missing
Pg929	Missing	Missing	Missing	Missing	Missing	Missing	2	0.122205	Missing	Missing
Pg933	Missing	Missing	2	0.403365	8	0.924167	Missing	Missing	3	0.934137
Pg934	Missing	Missing	Missing	Missing	Missing	Missing	3	0.0761622	Missing	Missing
Pg941	Missing	Missing	Missing	Missing	Missing	Missing	Missing	Missing	3	0.377931
Pg945	Missing	Missing	Missing	Missing	Missing	Missing	Missing	Missing	2	1.05418
Pg952	Missing	Missing	3	1.14887	Missing	Missing	Missing	Missing	Missing	Missing
Pg955	Missing	Missing	2	0.493937	Missing	Missing	Missing	Missing	Missing	Missing
Pg963	Missing	Missing	Missing	Missing	Missing	Missing	2	0.65626	Missing	Missing
Pg980	Missing	Missing	Missing	Missing	Missing	Missing	2	0.969832	Missing	Missing
Pg992	12	0.298758	Missing	Missing	Missing	Missing	Missing	Missing	Missing	Missing
Pg996	Missing	Missing	4	0.973101	2	0.698363	3	1.16828	Missing	Missing
Pg999	Missing	Missing	Missing	Missing	Missing	Missing	Missing	Missing	2	1.80662
Pg1000	Missing	Missing	Missing	Missing	Missing	Missing	2	0.38303	Missing	Missing
Pg1007	Missing	Missing	Missing	Missing	Missing	Missing	5	0.0339669	Missing	Missing
Pg1009	Missing	Missing	Missing	Missing	Missing	Missing	3	0.0417778	Missing	Missing
Pg1016	Missing	Missing	Missing	Missing	Missing	Missing	Missing	Missing	4	0.712806
Pg1019	Missing	Missing	Missing	Missing	Missing	Missing	Missing	Missing	3	0.382451
Pg1030	Missing	Missing	3	0.810392	Missing	Missing	Missing	Missing	Missing	Missing
Pg1040	Missing	Missing	Missing	Missing	Missing	Missing	3	0.712566	Missing	Missing
Pg1043	Missing	Missing	Missing	Missing	Missing	Missing	3	0.273521	Missing	Missing
Pg1044	Missing	Missing	Missing	Missing	2	1.17047	Missing	Missing	Missing	Missing
Pg1049	Missing	Missing	Missing	Missing	Missing	Missing	2	0.375923	Missing	Missing
Pg1056	Missing	Missing	Missing	Missing	Missing	Missing	Missing	Missing	2	1.1947
Pg1057	Missing	Missing	5	0.995027	2	1.50898	Missing	Missing	Missing	Missing
Pg1065	Missing	Missing	2	0.886149	Missing	Missing	2	0.970236	Missing	Missing
Pg1066	Missing	Missing	Missing	Missing	Missing	Missing	5	0.0863774	Missing	Missing
Pg1074	Missing	Missing	2	2.33564	Missing	Missing	Missing	Missing	Missing	Missing
Pg1076	Missing	Missing	Missing	Missing	Missing	Missing	8	0.0380277	Missing	Missing
Pg1084	Missing	Missing	Missing	Missing	Missing	Missing	Missing	Missing	2	0.646624
Pg1085	Missing	Missing	2	2.57585	Missing	Missing	Missing	Missing	Missing	Missing
Pg1103	Missing	Missing	Missing	Missing	Missing	Missing	Missing	Missing	5	0.310561
Pg1111	Missing	Missing	2	0.460331	Missing	Missing	Missing	Missing	Missing	Missing
Pg1112	Missing	Missing	Missing	Missing	Missing	Missing	Missing	Missing	2	0.471785
Pg1119	Missing	Missing	Missing	Missing	Missing	Missing	2	1.21497	Missing	Missing
Pg1128	Missing	Missing	Missing	Missing	2	2.27856	Missing	Missing	Missing	Missing
Pg1130	5	1.29418	Missing	Missing	Missing	Missing	Missing	Missing	Missing	Missing
Pg1133	Missing	Missing	Missing	Missing	Missing	Missing	Missing	Missing	2	1.74814
Pg1134	Missing	Missing	Missing	Missing	Missing	Missing	3	0.0893404	Missing	Missing
Pg1135	Missing	Missing	Missing	Missing	Missing	Missing	2	1.55396	Missing	Missing
Pg1148	Missing	Missing	Missing	Missing	Missing	Missing	3	0.209679	Missing	Missing
Pg1151	4	0.27992	Missing	Missing	Missing	Missing	2	0.566151	Missing	Missing
Pg1153	Missing	Missing	Missing	Missing	Missing	Missing	Missing	Missing	2	1.58956
Pg1154	Missing	Missing	Missing	Missing	Missing	Missing	Missing	Missing	2	0.681547
Pg1159	Missing	Missing	Missing	Missing	Missing	Missing	4	0.0647215	Missing	Missing
Pg1164	Missing	Missing	Missing	Missing	2	0.533643	Missing	Missing	Missing	Missing
Pg1170	Missing	Missing	2	0.491655	Missing	Missing	Missing	Missing	Missing	Missing
Pg1174	Missing	Missing	Missing	Missing	Missing	Missing	2	0.26174	Missing	Missing
Pg1180	Missing	Missing	2	2.23659	Missing	Missing	Missing	Missing	Missing	Missing
Pg1183	Missing	Missing	Missing	Missing	Missing	Missing	Missing	Missing	2	0.840896
Pg1185	Missing	Missing	Missing	Missing	Missing	Missing	2	1.4389	Missing	Missing
Pg1186	Missing	Missing	2	1.29496	2	2.72429	Missing	Missing	Missing	Missing
Pg1191	Missing	Missing	Missing	Missing	Missing	Missing	2	1.43073	Missing	Missing
Pg1199	Missing	Missing	129	0.130951	Missing	Missing	2	0.673671	Missing	Missing
Pg1203	Missing	Missing	47	0.128725	Missing	Missing	Missing	Missing	Missing	Missing
Pg1205	Missing	Missing	Missing	Missing	Missing	Missing	2	0.166539	Missing	Missing
Pg1208	Missing	Missing	2	0.761242	Missing	Missing	Missing	Missing	2	1.41614
Pg1212	Missing	Missing	Missing	Missing	Missing	Missing	Missing	Missing	2	1.11148
Pg1226	Missing	Missing	2	0.0922862	Missing	Missing	Missing	Missing	Missing	Missing
Pg1227	2	4.38127	14	2.76446	608	0.720974	Missing	Missing	Missing	Missing
Pg1231	Missing	Missing	Missing	Missing	Missing	Missing	2	0.0473152	Missing	Missing
Pg1232	Missing	Missing	Missing	Missing	Missing	Missing	Missing	Missing	2	0.265359
Pg1244	Missing	Missing	Missing	Missing	Missing	Missing	2	1.82864	Missing	Missing
Pg1256	Missing	Missing	Missing	Missing	Missing	Missing	2	1.24745	Missing	Missing
Pg1259	2	1.62801	2	0.976343	Missing	Missing	2	0.712153	Missing	Missing
Pg1267	Missing	Missing	Missing	Missing	Missing	Missing	2	0.652573	Missing	Missing
Pg1270	Missing	Missing	4	0.0456387	Missing	Missing	Missing	Missing	Missing	Missing
Pg1277	Missing	Missing	Missing	Missing	Missing	Missing	Missing	Missing	2	0.454292
Pg1302	Missing	Missing	3	0.696278	Missing	Missing	Missing	Missing	Missing	Missing
Pg1306	Missing	Missing	Missing	Missing	4	0.247256	Missing	Missing	Missing	Missing
Pg1311	Missing	Missing	Missing	Missing	Missing	Missing	Missing	Missing	2	1.34051
Pg1312	Missing	Missing	Missing	Missing	Missing	Missing	2	2.0561	Missing	Missing
Pg1325	Missing	Missing	Missing	Missing	Missing	Missing	Missing	Missing	4	1.01491
Pg1333	Missing	Missing	Missing	Missing	Missing	Missing	Missing	Missing	4	0.54114
Pg1337	Missing	Missing	Missing	Missing	Missing	Missing	2	0.0783485	Missing	Missing
Pg1338	Missing	Missing	Missing	Missing	Missing	Missing	Missing	Missing	3	1.46057
Pg1340	Missing	Missing	Missing	Missing	Missing	Missing	Missing	Missing	2	1.67521
Pg1348	Missing	Missing	Missing	Missing	Missing	Missing	6	0.255721	Missing	Missing
Pg1355	Missing	Missing	2	1.67695	Missing	Missing	Missing	Missing	Missing	Missing
Pg1386	Missing	Missing	Missing	Missing	Missing	Missing	3	0.446193	Missing	Missing
Pg1394	Missing	Missing	Missing	Missing	Missing	Missing	Missing	Missing	2	2.02035
Pg1403	Missing	Missing	5	0.965195	Missing	Missing	4	1.37109	Missing	Missing
Pg1406	Missing	Missing	Missing	Missing	Missing	Missing	Missing	Missing	2	0.490485
Pg1410	Missing	Missing	Missing	Missing	Missing	Missing	2	0.233148	Missing	Missing
Pg1413	Missing	Missing	3	0.74645	Missing	Missing	Missing	Missing	Missing	Missing
Pg1421	Missing	Missing	2	0.777462	Missing	Missing	Missing	Missing	Missing	Missing
Pg1424	3	1.53561	Missing	Missing	Missing	Missing	Missing	Missing	Missing	Missing
Pg1430	Missing	Missing	Missing	Missing	Missing	Missing	Missing	Missing	3	0.131037
Pg1437	3	1.74025	Missing	Missing	Missing	Missing	Missing	Missing	Missing	Missing
Pg1439	Missing	Missing	Missing	Missing	Missing	Missing	2	0.175767	Missing	Missing
Pg1443	Missing	Missing	2	2.05846	Missing	Missing	Missing	Missing	Missing	Missing
Pg1446	3	1.42716	Missing	Missing	Missing	Missing	Missing	Missing	Missing	Missing
Pg1448	Missing	Missing	Missing	Missing	Missing	Missing	4	1.91462	Missing	Missing
Pg1455	Missing	Missing	Missing	Missing	Missing	Missing	2	0.442382	Missing	Missing
Pg1464	Missing	Missing	Missing	Missing	Missing	Missing	2	1.21526	Missing	Missing
Pg1474	Missing	Missing	2	3.33749	Missing	Missing	Missing	Missing	Missing	Missing
Pg1484	Missing	Missing	2	0.88648	Missing	Missing	Missing	Missing	2	0.634428
Pg1490	Missing	Missing	Missing	Missing	Missing	Missing	Missing	Missing	2	0.430644
Pg1492	Missing	Missing	2	2.19986	Missing	Missing	Missing	Missing	Missing	Missing
Pg1495	Missing	Missing	Missing	Missing	Missing	Missing	Missing	Missing	3	0.672189
Pg1503	Missing	Missing	Missing	Missing	Missing	Missing	Missing	Missing	8	0.105009
Pg1510	17	0.582654	2	0.561262	4	0.331484	Missing	Missing	Missing	Missing
Pg1514	Missing	Missing	Missing	Missing	Missing	Missing	Missing	Missing	2	0.375349
Pg1533	Missing	Missing	Missing	Missing	Missing	Missing	2	0.0160875	Missing	Missing
Pg1546	Missing	Missing	Missing	Missing	Missing	Missing	Missing	Missing	2	1.65426
Pg1563	Missing	Missing	Missing	Missing	93	0.0839633	Missing	Missing	Missing	Missing
Pg1564	Missing	Missing	121	0.435499	308	0.59493	Missing	Missing	Missing	Missing
Pg1566	Missing	Missing	Missing	Missing	5	0.324667	Missing	Missing	Missing	Missing
Pg1567	Missing	Missing	Missing	Missing	98	0.965441	Missing	Missing	Missing	Missing
Pg1568	Missing	Missing	Missing	Missing	5	0.0633968	Missing	Missing	Missing	Missing
Pg1569	Missing	Missing	Missing	Missing	26	0.955873	Missing	Missing	Missing	Missing
Pg1570	Missing	Missing	Missing	Missing	45	1.97597	Missing	Missing	Missing	Missing
Pg1571	Missing	Missing	Missing	Missing	91	0.303047	Missing	Missing	Missing	Missing
Pg1572	Missing	Missing	Missing	Missing	6	0.148657	Missing	Missing	Missing	Missing
Pg1573	Missing	Missing	Missing	Missing	6	0.0293246	Missing	Missing	Missing	Missing
Pg1574	Missing	Missing	Missing	Missing	231	0.650197	Missing	Missing	Missing	Missing
Pg1575	Missing	Missing	Missing	Missing	2	0.675969	Missing	Missing	Missing	Missing
Pg1576	Missing	Missing	Missing	Missing	203	0.181113	Missing	Missing	Missing	Missing
Pg1577	Missing	Missing	Missing	Missing	2	0.171146	Missing	Missing	Missing	Missing
Pg1578	Missing	Missing	Missing	Missing	2	1.94437	Missing	Missing	Missing	Missing
Pg1579	Missing	Missing	Missing	Missing	93	0.328098	Missing	Missing	Missing	Missing
Pg1580	Missing	Missing	Missing	Missing	210	0.412436	Missing	Missing	Missing	Missing
Pg1581	Missing	Missing	Missing	Missing	2	1.00693	Missing	Missing	Missing	Missing
Pg1582	Missing	Missing	Missing	Missing	8	0.572353	Missing	Missing	Missing	Missing
Pg1583	Missing	Missing	Missing	Missing	199	0.404071	Missing	Missing	Missing	Missing
Pg1584	Missing	Missing	Missing	Missing	3	0.315208	Missing	Missing	Missing	Missing
Pg1585	Missing	Missing	Missing	Missing	2	0.154142	Missing	Missing	Missing	Missing
Pg1586	Missing	Missing	Missing	Missing	89	1.23426	Missing	Missing	Missing	Missing
Pg1587	Missing	Missing	Missing	Missing	32	0.443718	Missing	Missing	Missing	Missing
Pg1588	Missing	Missing	Missing	Missing	5	0.38621	Missing	Missing	Missing	Missing
Pg1589	Missing	Missing	Missing	Missing	5	0.0912549	Missing	Missing	Missing	Missing
Pg1590	Missing	Missing	Missing	Missing	2	0.232717	Missing	Missing	Missing	Missing
Pg1592	Missing	Missing	Missing	Missing	154	0.477284	Missing	Missing	Missing	Missing
Pg1593	Missing	Missing	Missing	Missing	5	0.200746	Missing	Missing	Missing	Missing
Pg1594	Missing	Missing	Missing	Missing	25	0.547595	Missing	Missing	Missing	Missing
Pg1595	Missing	Missing	11	1.32081	5	1.85894	Missing	Missing	Missing	Missing
Pg1597	Missing	Missing	Missing	Missing	13	0.0882757	Missing	Missing	Missing	Missing
Pg1598	Missing	Missing	Missing	Missing	3	0.308438	Missing	Missing	Missing	Missing
Pg1599	Missing	Missing	Missing	Missing	9	0.200585	Missing	Missing	Missing	Missing
Pg1600	Missing	Missing	Missing	Missing	34	0.859163	Missing	Missing	Missing	Missing
Pg1601	Missing	Missing	Missing	Missing	23	0.515402	Missing	Missing	Missing	Missing
Pg1603	Missing	Missing	Missing	Missing	6	0.0472697	Missing	Missing	Missing	Missing
Pg1604	Missing	Missing	Missing	Missing	79	0.485766	Missing	Missing	Missing	Missing
Pg1605	Missing	Missing	Missing	Missing	31	0.0701886	Missing	Missing	Missing	Missing
Pg1606	Missing	Missing	Missing	Missing	6	0.553759	Missing	Missing	Missing	Missing
Pg1607	Missing	Missing	Missing	Missing	25	0.0635731	Missing	Missing	Missing	Missing
Pg1608	Missing	Missing	Missing	Missing	51	1.47982	Missing	Missing	Missing	Missing
Pg1609	Missing	Missing	Missing	Missing	12	1.05775	Missing	Missing	Missing	Missing
Pg1610	Missing	Missing	Missing	Missing	40	0.432909	Missing	Missing	Missing	Missing
Pg1611	Missing	Missing	Missing	Missing	10	1.04645	Missing	Missing	Missing	Missing
Pg1612	Missing	Missing	Missing	Missing	15	0.128461	Missing	Missing	Missing	Missing
Pg1613	Missing	Missing	Missing	Missing	3	0.444454	Missing	Missing	Missing	Missing
Pg1614	Missing	Missing	Missing	Missing	15	0.0570636	Missing	Missing	Missing	Missing
Pg1615	Missing	Missing	Missing	Missing	6	4.09	Missing	Missing	Missing	Missing
Pg1616	Missing	Missing	Missing	Missing	3	0.290441	Missing	Missing	Missing	Missing
Pg1617	Missing	Missing	Missing	Missing	2	0.19267	Missing	Missing	Missing	Missing
Pg1618	Missing	Missing	Missing	Missing	2	0.979555	Missing	Missing	Missing	Missing
Pg1619	Missing	Missing	Missing	Missing	35	2.05263	Missing	Missing	Missing	Missing
Pg1620	Missing	Missing	Missing	Missing	2	0.205395	Missing	Missing	Missing	Missing
Pg1623	Missing	Missing	Missing	Missing	47	1.75093	Missing	Missing	Missing	Missing
Pg1624	Missing	Missing	Missing	Missing	10	1.6006	Missing	Missing	Missing	Missing
Pg1625	Missing	Missing	Missing	Missing	2	0.762229	Missing	Missing	Missing	Missing
Pg1626	Missing	Missing	Missing	Missing	2	1.11876	Missing	Missing	Missing	Missing
Pg1627	Missing	Missing	Missing	Missing	2	0.690184	Missing	Missing	Missing	Missing
Pg1628	Missing	Missing	Missing	Missing	5	0.132674	Missing	Missing	Missing	Missing
Pg1629	Missing	Missing	Missing	Missing	10	0.319719	Missing	Missing	Missing	Missing
Pg1630	Missing	Missing	Missing	Missing	44	1.23564	Missing	Missing	Missing	Missing
Pg1631	Missing	Missing	Missing	Missing	121	0.251678	Missing	Missing	Missing	Missing
Pg1632	Missing	Missing	Missing	Missing	2	0.346943	Missing	Missing	Missing	Missing
Pg1633	Missing	Missing	Missing	Missing	9	1.55742	Missing	Missing	Missing	Missing
Pg1634	Missing	Missing	Missing	Missing	13	1.01811	Missing	Missing	Missing	Missing
Pg1635	Missing	Missing	Missing	Missing	2	0.669024	Missing	Missing	Missing	Missing
Pg1636	Missing	Missing	Missing	Missing	4	0.77529	Missing	Missing	Missing	Missing
Pg1637	Missing	Missing	Missing	Missing	8	1.06893	Missing	Missing	Missing	Missing
Pg1638	Missing	Missing	Missing	Missing	3	0.707391	Missing	Missing	Missing	Missing
Pg1639	Missing	Missing	Missing	Missing	2	1.28306	Missing	Missing	Missing	Missing
Pg1641	4	0.964073	Missing	Missing	2	0.922016	Missing	Missing	Missing	Missing
Pg1642	Missing	Missing	Missing	Missing	3	0.0712544	Missing	Missing	Missing	Missing
Pg1643	Missing	Missing	Missing	Missing	36	0.0942151	Missing	Missing	Missing	Missing
Pg1644	Missing	Missing	Missing	Missing	3	0.288756	Missing	Missing	Missing	Missing
Pg1645	Missing	Missing	Missing	Missing	2	0.0407427	Missing	Missing	Missing	Missing
Pg1646	Missing	Missing	Missing	Missing	2	0.299933	Missing	Missing	Missing	Missing
Pg1647	Missing	Missing	Missing	Missing	3	0.158469	Missing	Missing	Missing	Missing
Pg1648	Missing	Missing	Missing	Missing	7	0.3215	Missing	Missing	Missing	Missing
Pg1649	Missing	Missing	Missing	Missing	2	1.25497	Missing	Missing	Missing	Missing
Pg1651	Missing	Missing	Missing	Missing	6	0.341198	Missing	Missing	Missing	Missing
Pg1652	Missing	Missing	Missing	Missing	6	4.51032	Missing	Missing	Missing	Missing
Pg1653	Missing	Missing	Missing	Missing	26	0.244432	Missing	Missing	Missing	Missing
Pg1654	Missing	Missing	Missing	Missing	3	0.418979	Missing	Missing	Missing	Missing
Pg1656	Missing	Missing	Missing	Missing	4	0.285013	Missing	Missing	Missing	Missing
Pg1657	Missing	Missing	Missing	Missing	10	2.85899	Missing	Missing	Missing	Missing
Pg1658	Missing	Missing	Missing	Missing	6	0.218867	Missing	Missing	Missing	Missing
Pg1659	Missing	Missing	Missing	Missing	3	0.0381309	Missing	Missing	Missing	Missing
Pg1661	Missing	Missing	Missing	Missing	23	0.297451	Missing	Missing	Missing	Missing
Pg1662	Missing	Missing	Missing	Missing	2	1.33411	Missing	Missing	Missing	Missing
Pg1663	Missing	Missing	Missing	Missing	15	2.05515	Missing	Missing	Missing	Missing
Pg1664	Missing	Missing	Missing	Missing	29	0.728269	Missing	Missing	Missing	Missing
Pg1665	4	1.96415	Missing	Missing	Missing	Missing	Missing	Missing	Missing	Missing
Pg1666	Missing	Missing	Missing	Missing	4	0.368737	Missing	Missing	Missing	Missing
Pg1667	Missing	Missing	Missing	Missing	3	1.03801	Missing	Missing	Missing	Missing
Pg1668	Missing	Missing	Missing	Missing	39	1.69797	Missing	Missing	Missing	Missing
Pg1669	Missing	Missing	Missing	Missing	8	0.416726	Missing	Missing	Missing	Missing
Pg1671	Missing	Missing	Missing	Missing	3	0.572641	Missing	Missing	Missing	Missing
Pg1672	Missing	Missing	Missing	Missing	2	0.107079	Missing	Missing	Missing	Missing
Pg1673	Missing	Missing	Missing	Missing	11	0.738678	Missing	Missing	Missing	Missing
Pg1674	Missing	Missing	Missing	Missing	6	0.30936	Missing	Missing	Missing	Missing
Pg1675	Missing	Missing	Missing	Missing	4	0.307467	Missing	Missing	Missing	Missing
Pg1676	Missing	Missing	Missing	Missing	3	1.14184	Missing	Missing	Missing	Missing
Pg1677	Missing	Missing	Missing	Missing	18	0.506176	Missing	Missing	Missing	Missing
Pg1678	Missing	Missing	Missing	Missing	19	0.476499	Missing	Missing	Missing	Missing
Pg1679	Missing	Missing	Missing	Missing	2	1.14106	Missing	Missing	Missing	Missing
Pg1680	Missing	Missing	Missing	Missing	4	0.168161	Missing	Missing	Missing	Missing
Pg1681	Missing	Missing	Missing	Missing	2	0.240654	Missing	Missing	Missing	Missing
Pg1682	Missing	Missing	Missing	Missing	3	0.208607	Missing	Missing	Missing	Missing
Pg1683	Missing	Missing	Missing	Missing	8	0.137424	Missing	Missing	Missing	Missing
Pg1684	Missing	Missing	Missing	Missing	2	0.248353	Missing	Missing	Missing	Missing
Pg1685	Missing	Missing	Missing	Missing	3	0.336498	Missing	Missing	Missing	Missing
Pg1688	Missing	Missing	Missing	Missing	12	1.71169	Missing	Missing	Missing	Missing
Pg1689	Missing	Missing	Missing	Missing	3	0.529108	Missing	Missing	Missing	Missing
Pg1690	Missing	Missing	Missing	Missing	11	0.180509	Missing	Missing	Missing	Missing
Pg1691	Missing	Missing	Missing	Missing	16	1.14615	Missing	Missing	Missing	Missing
Pg1692	Missing	Missing	Missing	Missing	4	0.612551	Missing	Missing	Missing	Missing
Pg1693	Missing	Missing	Missing	Missing	2	1.49089	Missing	Missing	Missing	Missing
Pg1694	Missing	Missing	Missing	Missing	6	0.0315503	Missing	Missing	Missing	Missing
Pg1697	Missing	Missing	Missing	Missing	4	1.81014	Missing	Missing	Missing	Missing
Pg1699	Missing	Missing	Missing	Missing	4	0.447301	Missing	Missing	Missing	Missing
Pg1700	Missing	Missing	Missing	Missing	19	0.137574	Missing	Missing	Missing	Missing
Pg1701	Missing	Missing	Missing	Missing	4	0.0173377	Missing	Missing	Missing	Missing
Pg1702	Missing	Missing	Missing	Missing	2	0.0483931	Missing	Missing	Missing	Missing
Pg1703	Missing	Missing	Missing	Missing	2	0.387214	Missing	Missing	Missing	Missing
Pg1704	Missing	Missing	Missing	Missing	9	0.199368	Missing	Missing	Missing	Missing
Pg1705	Missing	Missing	Missing	Missing	2	0.396437	Missing	Missing	Missing	Missing
Pg1706	Missing	Missing	Missing	Missing	5	0.0357962	Missing	Missing	Missing	Missing
Pg1707	Missing	Missing	Missing	Missing	4	0.259796	Missing	Missing	Missing	Missing
Pg1708	Missing	Missing	Missing	Missing	2	1.68987	Missing	Missing	Missing	Missing
Pg1709	Missing	Missing	Missing	Missing	4	3.85618	Missing	Missing	Missing	Missing
Pg1710	Missing	Missing	Missing	Missing	3	0.345982	Missing	Missing	Missing	Missing
Pg1711	Missing	Missing	Missing	Missing	6	0.130327	Missing	Missing	Missing	Missing
Pg1712	Missing	Missing	Missing	Missing	5	2.21863	Missing	Missing	Missing	Missing
Pg1714	Missing	Missing	Missing	Missing	14	1.63084	Missing	Missing	Missing	Missing
Pg1715	Missing	Missing	Missing	Missing	2	0.176588	Missing	Missing	Missing	Missing
Pg1716	Missing	Missing	Missing	Missing	5	0.476192	Missing	Missing	Missing	Missing
Pg1717	Missing	Missing	Missing	Missing	3	0.161404	Missing	Missing	Missing	Missing
Pg1718	3	1.21668	3	0.747955	22	0.911313	Missing	Missing	Missing	Missing
Pg1719	Missing	Missing	Missing	Missing	2	0.731287	Missing	Missing	Missing	Missing
Pg1720	Missing	Missing	Missing	Missing	10	0.208885	Missing	Missing	Missing	Missing
Pg1721	Missing	Missing	Missing	Missing	2	0.125333	Missing	Missing	Missing	Missing
Pg1722	Missing	Missing	Missing	Missing	5	0.718614	Missing	Missing	Missing	Missing
Pg1724	Missing	Missing	Missing	Missing	23	1.42868	Missing	Missing	Missing	Missing
Pg1725	Missing	Missing	Missing	Missing	4	0.871837	Missing	Missing	Missing	Missing
Pg1726	Missing	Missing	Missing	Missing	6	1.01456	Missing	Missing	Missing	Missing
Pg1728	Missing	Missing	Missing	Missing	2	0.27716	Missing	Missing	Missing	Missing
Pg1729	Missing	Missing	Missing	Missing	2	2.34546	Missing	Missing	Missing	Missing
Pg1730	Missing	Missing	Missing	Missing	2	0.606081	Missing	Missing	Missing	Missing
Pg1731	Missing	Missing	Missing	Missing	2	0.798176	Missing	Missing	Missing	Missing
Pg1732	Missing	Missing	Missing	Missing	3	1.55359	Missing	Missing	Missing	Missing
Pg1733	Missing	Missing	Missing	Missing	2	0.245853	Missing	Missing	Missing	Missing
Pg1734	Missing	Missing	Missing	Missing	4	1.89625	Missing	Missing	Missing	Missing
Pg1735	Missing	Missing	Missing	Missing	2	0.0295173	Missing	Missing	Missing	Missing
Pg1737	Missing	Missing	Missing	Missing	5	0.335728	Missing	Missing	Missing	Missing
Pg1738	Missing	Missing	Missing	Missing	12	0.352322	Missing	Missing	Missing	Missing
Pg1739	Missing	Missing	Missing	Missing	20	0.343888	Missing	Missing	Missing	Missing
Pg1740	Missing	Missing	Missing	Missing	4	1.32698	Missing	Missing	Missing	Missing
Pg1741	Missing	Missing	Missing	Missing	7	0.140306	Missing	Missing	Missing	Missing
Pg1742	Missing	Missing	Missing	Missing	2	2.61365	Missing	Missing	Missing	Missing
Pg1743	Missing	Missing	Missing	Missing	3	1.11428	Missing	Missing	Missing	Missing
Pg1744	Missing	Missing	Missing	Missing	2	2.46893	Missing	Missing	Missing	Missing
Pg1745	Missing	Missing	Missing	Missing	3	1.19992	Missing	Missing	Missing	Missing
Pg1746	Missing	Missing	Missing	Missing	2	3.1603	Missing	Missing	Missing	Missing
Pg1747	Missing	Missing	Missing	Missing	2	0.109945	Missing	Missing	Missing	Missing
Pg1748	Missing	Missing	Missing	Missing	3	0.243085	Missing	Missing	Missing	Missing
Pg1749	Missing	Missing	Missing	Missing	2	6.06522	Missing	Missing	Missing	Missing
Pg1750	Missing	Missing	Missing	Missing	11	0.0638583	Missing	Missing	Missing	Missing
Pg1751	Missing	Missing	Missing	Missing	3	1.07041	Missing	Missing	Missing	Missing
Pg1752	Missing	Missing	Missing	Missing	2	0.0243056	Missing	Missing	Missing	Missing
Pg1753	Missing	Missing	Missing	Missing	3	0.17257	Missing	Missing	Missing	Missing
Pg1754	Missing	Missing	Missing	Missing	11	0.165738	Missing	Missing	Missing	Missing
Pg1755	Missing	Missing	Missing	Missing	3	0.853887	Missing	Missing	Missing	Missing
Pg1756	Missing	Missing	Missing	Missing	35	0.555079	Missing	Missing	Missing	Missing
Pg1757	Missing	Missing	Missing	Missing	2	0.388311	Missing	Missing	Missing	Missing
Pg1758	Missing	Missing	Missing	Missing	5	2.56278	Missing	Missing	Missing	Missing
Pg1759	Missing	Missing	Missing	Missing	3	0.673357	Missing	Missing	Missing	Missing
Pg1760	Missing	Missing	Missing	Missing	15	1.62396	Missing	Missing	Missing	Missing
Pg1761	Missing	Missing	Missing	Missing	15	0.24568	Missing	Missing	Missing	Missing
Pg1762	Missing	Missing	Missing	Missing	6	0.257318	Missing	Missing	Missing	Missing
Pg1763	Missing	Missing	Missing	Missing	2	0.349841	Missing	Missing	Missing	Missing
Pg1765	Missing	Missing	Missing	Missing	15	0.449103	Missing	Missing	Missing	Missing
Pg1766	Missing	Missing	Missing	Missing	4	0.559311	Missing	Missing	Missing	Missing
Pg1767	Missing	Missing	Missing	Missing	4	0.317935	Missing	Missing	Missing	Missing
Pg1768	Missing	Missing	2	0.18054	2	2.67052	Missing	Missing	Missing	Missing
Pg1769	Missing	Missing	Missing	Missing	2	0.303258	Missing	Missing	Missing	Missing
Pg1770	Missing	Missing	Missing	Missing	8	0.112823	Missing	Missing	Missing	Missing
Pg1772	Missing	Missing	Missing	Missing	3	1.46004	Missing	Missing	Missing	Missing
Pg1773	Missing	Missing	Missing	Missing	3	1.05338	Missing	Missing	Missing	Missing
Pg1774	Missing	Missing	Missing	Missing	2	0.962625	Missing	Missing	Missing	Missing
Pg1775	Missing	Missing	Missing	Missing	2	2.25182	Missing	Missing	Missing	Missing
Pg1776	Missing	Missing	Missing	Missing	7	0.42486	Missing	Missing	Missing	Missing
Pg1777	Missing	Missing	Missing	Missing	3	0.772974	Missing	Missing	Missing	Missing
Pg1778	Missing	Missing	Missing	Missing	2	0.229417	Missing	Missing	Missing	Missing
Pg1779	Missing	Missing	Missing	Missing	2	1.89492	Missing	Missing	Missing	Missing
Pg1781	Missing	Missing	Missing	Missing	6	2.73611	Missing	Missing	Missing	Missing
Pg1782	Missing	Missing	Missing	Missing	2	3.26912	Missing	Missing	Missing	Missing
Pg1783	Missing	Missing	Missing	Missing	2	2.65442	Missing	Missing	Missing	Missing
Pg1784	Missing	Missing	Missing	Missing	6	0.309685	Missing	Missing	Missing	Missing
Pg1785	Missing	Missing	Missing	Missing	2	1.96402	Missing	Missing	Missing	Missing
Pg1786	Missing	Missing	Missing	Missing	3	0.198421	Missing	Missing	Missing	Missing
Pg1787	Missing	Missing	Missing	Missing	2	0.211702	Missing	Missing	Missing	Missing
Pg1788	Missing	Missing	Missing	Missing	3	0.137562	Missing	Missing	Missing	Missing
Pg1789	Missing	Missing	7	0.190599	2	0.379284	Missing	Missing	Missing	Missing
Pg1790	Missing	Missing	Missing	Missing	5	0.647056	Missing	Missing	Missing	Missing
Pg1791	Missing	Missing	Missing	Missing	2	0.806469	Missing	Missing	Missing	Missing
Pg1792	Missing	Missing	Missing	Missing	13	0.154019	Missing	Missing	Missing	Missing
Pg1793	Missing	Missing	Missing	Missing	2	2.02105	Missing	Missing	Missing	Missing
Pg1794	Missing	Missing	Missing	Missing	2	0.292528	Missing	Missing	Missing	Missing
Pg1795	Missing	Missing	Missing	Missing	9	0.612053	Missing	Missing	Missing	Missing
Pg1797	Missing	Missing	Missing	Missing	2	0.623306	Missing	Missing	Missing	Missing
Pg1799	Missing	Missing	Missing	Missing	2	0.383555	Missing	Missing	Missing	Missing
Pg1800	Missing	Missing	Missing	Missing	18	0.336077	Missing	Missing	Missing	Missing
Pg1801	Missing	Missing	Missing	Missing	3	0.987798	Missing	Missing	Missing	Missing
Pg1803	Missing	Missing	Missing	Missing	4	0.435746	Missing	Missing	Missing	Missing
Pg1805	Missing	Missing	6	1.91596	3	3.52844	Missing	Missing	Missing	Missing
Pg1806	Missing	Missing	Missing	Missing	3	0.372713	Missing	Missing	Missing	Missing
Pg1808	Missing	Missing	Missing	Missing	5	0.555233	Missing	Missing	Missing	Missing
Pg1809	Missing	Missing	Missing	Missing	8	0.951393	Missing	Missing	Missing	Missing
Pg1810	Missing	Missing	Missing	Missing	5	0.945609	Missing	Missing	Missing	Missing
Pg1811	Missing	Missing	Missing	Missing	9	1.6959	Missing	Missing	Missing	Missing
Pg1812	Missing	Missing	Missing	Missing	3	0.196794	Missing	Missing	Missing	Missing
Pg1813	Missing	Missing	Missing	Missing	2	0.0339312	Missing	Missing	Missing	Missing
Pg1814	Missing	Missing	Missing	Missing	8	1.7695	Missing	Missing	Missing	Missing
Pg1815	Missing	Missing	Missing	Missing	4	0.020721	Missing	Missing	Missing	Missing
Pg1817	Missing	Missing	Missing	Missing	3	0.0654051	Missing	Missing	Missing	Missing
Pg1818	Missing	Missing	Missing	Missing	2	0.521517	Missing	Missing	Missing	Missing
Pg1819	Missing	Missing	Missing	Missing	5	0.255183	Missing	Missing	Missing	Missing
Pg1820	Missing	Missing	Missing	Missing	2	0.0791783	Missing	Missing	Missing	Missing
Pg1823	Missing	Missing	Missing	Missing	2	0.613841	Missing	Missing	Missing	Missing
Pg1824	Missing	Missing	Missing	Missing	5	1.02048	Missing	Missing	Missing	Missing
Pg1826	Missing	Missing	Missing	Missing	4	0.718722	Missing	Missing	Missing	Missing
Pg1827	Missing	Missing	Missing	Missing	3	0.217098	Missing	Missing	Missing	Missing
Pg1828	Missing	Missing	Missing	Missing	2	0.338647	Missing	Missing	Missing	Missing
Pg1829	Missing	Missing	Missing	Missing	2	2.25312	Missing	Missing	Missing	Missing
Pg1830	Missing	Missing	Missing	Missing	2	3.49523	Missing	Missing	Missing	Missing
Pg1831	Missing	Missing	Missing	Missing	3	0.920018	Missing	Missing	Missing	Missing
Pg1832	Missing	Missing	Missing	Missing	2	2.49356	Missing	Missing	Missing	Missing
Pg1833	Missing	Missing	Missing	Missing	2	2.03869	Missing	Missing	Missing	Missing
Pg1834	Missing	Missing	Missing	Missing	2	0.42303	Missing	Missing	Missing	Missing
Pg1835	Missing	Missing	Missing	Missing	7	0.37197	Missing	Missing	Missing	Missing
Pg1836	Missing	Missing	Missing	Missing	3	0.406783	Missing	Missing	Missing	Missing
Pg1837	Missing	Missing	Missing	Missing	2	0.250611	Missing	Missing	Missing	Missing
Pg1839	Missing	Missing	Missing	Missing	2	0.371802	Missing	Missing	Missing	Missing
Pg1840	Missing	Missing	Missing	Missing	3	0.388168	Missing	Missing	Missing	Missing
Pg1841	Missing	Missing	Missing	Missing	3	0.228758	Missing	Missing	Missing	Missing
Pg1843	Missing	Missing	Missing	Missing	3	0.0188395	Missing	Missing	Missing	Missing
Pg1844	30	1.49623	Missing	Missing	4	2.70958	Missing	Missing	Missing	Missing
Pg1845	Missing	Missing	Missing	Missing	2	1.58486	Missing	Missing	Missing	Missing
Pg1847	Missing	Missing	Missing	Missing	2	2.51184	Missing	Missing	Missing	Missing
Pg1848	Missing	Missing	Missing	Missing	2	1.07097	Missing	Missing	Missing	Missing
Pg1849	Missing	Missing	Missing	Missing	4	0.236422	Missing	Missing	Missing	Missing
Pg1850	Missing	Missing	Missing	Missing	2	1.83796	Missing	Missing	Missing	Missing
Pg1852	Missing	Missing	Missing	Missing	2	0.716184	Missing	Missing	Missing	Missing
Pg1854	Missing	Missing	Missing	Missing	3	2.32892	Missing	Missing	Missing	Missing
Pg1855	Missing	Missing	Missing	Missing	2	1.5154	Missing	Missing	Missing	Missing
Pg1856	Missing	Missing	Missing	Missing	2	0.726488	Missing	Missing	Missing	Missing
Pg1857	Missing	Missing	Missing	Missing	2	0.423168	Missing	Missing	Missing	Missing
Pg1858	Missing	Missing	Missing	Missing	2	2.06705	Missing	Missing	Missing	Missing
Pg1859	Missing	Missing	Missing	Missing	14	0.0715604	Missing	Missing	Missing	Missing
Pg1860	Missing	Missing	Missing	Missing	3	0.547777	Missing	Missing	Missing	Missing
Pg1862	Missing	Missing	Missing	Missing	2	0.0214904	Missing	Missing	Missing	Missing
Pg1863	Missing	Missing	Missing	Missing	4	0.148503	Missing	Missing	Missing	Missing
Pg1864	Missing	Missing	Missing	Missing	6	0.348847	Missing	Missing	Missing	Missing
Pg1865	Missing	Missing	Missing	Missing	4	1.41037	Missing	Missing	Missing	Missing
Pg1866	Missing	Missing	2	0.810997	Missing	Missing	Missing	Missing	Missing	Missing
Pg1867	Missing	Missing	Missing	Missing	3	0.309593	Missing	Missing	Missing	Missing
Pg1868	Missing	Missing	Missing	Missing	4	2.4436	Missing	Missing	Missing	Missing
Pg1869	Missing	Missing	Missing	Missing	2	1.72858	Missing	Missing	Missing	Missing
Pg1870	Missing	Missing	Missing	Missing	3	0.0988396	Missing	Missing	Missing	Missing
Pg1871	Missing	Missing	Missing	Missing	2	0.163266	Missing	Missing	Missing	Missing
Pg1872	Missing	Missing	Missing	Missing	13	0.72157	Missing	Missing	Missing	Missing
Pg1875	Missing	Missing	Missing	Missing	3	0.210892	Missing	Missing	Missing	Missing
Pg1876	Missing	Missing	Missing	Missing	2	1.05303	Missing	Missing	Missing	Missing
Pg1877	Missing	Missing	Missing	Missing	3	0.377791	Missing	Missing	Missing	Missing
Pg1878	Missing	Missing	Missing	Missing	2	0.537313	Missing	Missing	Missing	Missing
Pg1879	Missing	Missing	Missing	Missing	3	2.11433	Missing	Missing	Missing	Missing
Pg1880	Missing	Missing	Missing	Missing	2	0.420571	Missing	Missing	Missing	Missing
Pg1881	Missing	Missing	Missing	Missing	6	0.61408	Missing	Missing	Missing	Missing
Pg1882	Missing	Missing	Missing	Missing	2	0.458652	Missing	Missing	Missing	Missing
Pg1883	Missing	Missing	Missing	Missing	2	0.517349	Missing	Missing	Missing	Missing
Pg1886	Missing	Missing	Missing	Missing	3	4.03102	Missing	Missing	Missing	Missing
Pg1887	Missing	Missing	Missing	Missing	2	6.04577	Missing	Missing	Missing	Missing
Pg1888	Missing	Missing	Missing	Missing	6	0.341302	Missing	Missing	Missing	Missing
Pg1890	Missing	Missing	Missing	Missing	2	0.725236	Missing	Missing	Missing	Missing
Pg1891	Missing	Missing	Missing	Missing	2	1.06136	Missing	Missing	Missing	Missing
Pg1892	Missing	Missing	Missing	Missing	2	3.74505	Missing	Missing	Missing	Missing
Pg1893	2	1.60194	Missing	Missing	2	1.28898	Missing	Missing	Missing	Missing
Pg1894	Missing	Missing	Missing	Missing	6	0.448213	Missing	Missing	Missing	Missing
Pg1896	Missing	Missing	Missing	Missing	3	1.29043	Missing	Missing	Missing	Missing
Pg1897	Missing	Missing	Missing	Missing	9	0.195029	Missing	Missing	Missing	Missing
Pg1898	Missing	Missing	Missing	Missing	3	0.413556	Missing	Missing	Missing	Missing
Pg1900	Missing	Missing	Missing	Missing	2	0.459759	Missing	Missing	Missing	Missing
Pg1901	Missing	Missing	Missing	Missing	3	0.401982	Missing	Missing	Missing	Missing
Pg1904	Missing	Missing	Missing	Missing	2	0.0279738	Missing	Missing	Missing	Missing
Pg1905	Missing	Missing	Missing	Missing	5	0.964471	Missing	Missing	Missing	Missing
Pg1907	Missing	Missing	Missing	Missing	2	0.301095	Missing	Missing	Missing	Missing
Pg1908	Missing	Missing	Missing	Missing	2	0.254155	Missing	Missing	Missing	Missing
Pg1909	Missing	Missing	Missing	Missing	2	0.570574	Missing	Missing	Missing	Missing
Pg1910	Missing	Missing	Missing	Missing	3	0.257608	Missing	Missing	Missing	Missing
Pg1911	Missing	Missing	Missing	Missing	2	2.78234	Missing	Missing	Missing	Missing
Pg1912	Missing	Missing	Missing	Missing	2	0.151811	Missing	Missing	Missing	Missing
Pg1913	Missing	Missing	Missing	Missing	2	0.112837	Missing	Missing	Missing	Missing
Pg1914	Missing	Missing	Missing	Missing	2	0.189242	Missing	Missing	Missing	Missing
Pg1915	Missing	Missing	Missing	Missing	3	0.728912	Missing	Missing	Missing	Missing
Pg1916	Missing	Missing	Missing	Missing	3	0.206852	Missing	Missing	Missing	Missing
Pg1917	Missing	Missing	Missing	Missing	4	0.164504	Missing	Missing	Missing	Missing
Pg1919	Missing	Missing	Missing	Missing	4	1.29537	Missing	Missing	Missing	Missing
Pg1920	Missing	Missing	Missing	Missing	2	0.284946	Missing	Missing	Missing	Missing
Pg1921	Missing	Missing	Missing	Missing	2	0.337073	Missing	Missing	Missing	Missing
Pg1923	Missing	Missing	Missing	Missing	2	4.07186	Missing	Missing	Missing	Missing
Pg1924	Missing	Missing	Missing	Missing	2	0.129216	Missing	Missing	Missing	Missing
Pg1925	Missing	Missing	Missing	Missing	2	1.83737	Missing	Missing	Missing	Missing
Pg1926	Missing	Missing	Missing	Missing	6	0.149793	Missing	Missing	Missing	Missing
Pg1927	Missing	Missing	Missing	Missing	2	0.69726	Missing	Missing	Missing	Missing
Pg1928	Missing	Missing	Missing	Missing	2	0.825532	Missing	Missing	Missing	Missing
Pg1929	Missing	Missing	Missing	Missing	2	0.390168	Missing	Missing	Missing	Missing
Pg1930	Missing	Missing	Missing	Missing	2	0.241413	Missing	Missing	Missing	Missing
Pg1931	Missing	Missing	Missing	Missing	4	1.22962	Missing	Missing	Missing	Missing
Pg1933	Missing	Missing	Missing	Missing	5	0.192102	Missing	Missing	Missing	Missing
Pg1935	Missing	Missing	Missing	Missing	3	0.54025	Missing	Missing	Missing	Missing
Pg1936	Missing	Missing	Missing	Missing	2	1.41436	Missing	Missing	Missing	Missing
Pg1937	Missing	Missing	Missing	Missing	2	0.930866	Missing	Missing	Missing	Missing
Pg1938	Missing	Missing	Missing	Missing	2	0.289006	Missing	Missing	Missing	Missing
Pg1940	Missing	Missing	Missing	Missing	2	1.69644	Missing	Missing	Missing	Missing
Pg1941	Missing	Missing	Missing	Missing	3	0.228199	Missing	Missing	Missing	Missing
Pg1942	Missing	Missing	Missing	Missing	3	2.27815	Missing	Missing	Missing	Missing
Pg1943	Missing	Missing	Missing	Missing	2	0.431148	Missing	Missing	Missing	Missing
Pg1944	Missing	Missing	Missing	Missing	2	0.163216	Missing	Missing	Missing	Missing
Pg1945	Missing	Missing	Missing	Missing	2	2.48416	Missing	Missing	Missing	Missing
Pg1946	Missing	Missing	Missing	Missing	3	0.345127	Missing	Missing	Missing	Missing
Pg1947	Missing	Missing	3	1.85953	2	2.89787	Missing	Missing	Missing	Missing
Pg1948	Missing	Missing	Missing	Missing	2	0.168891	Missing	Missing	Missing	Missing
Pg1949	Missing	Missing	Missing	Missing	2	0.225403	Missing	Missing	Missing	Missing
Pg1950	Missing	Missing	Missing	Missing	2	0.244442	Missing	Missing	Missing	Missing
Pg1951	Missing	Missing	Missing	Missing	3	0.284066	Missing	Missing	Missing	Missing
Pg1953	Missing	Missing	Missing	Missing	2	1.22414	Missing	Missing	Missing	Missing
Pg1954	Missing	Missing	Missing	Missing	2	0.0245996	Missing	Missing	Missing	Missing
Pg1955	Missing	Missing	Missing	Missing	2	0.176503	Missing	Missing	Missing	Missing
Pg1957	Missing	Missing	Missing	Missing	2	0.216274	Missing	Missing	Missing	Missing
Pg1958	Missing	Missing	Missing	Missing	3	0.441951	Missing	Missing	Missing	Missing
Pg1959	Missing	Missing	Missing	Missing	2	1.40601	Missing	Missing	Missing	Missing
Pg1960	Missing	Missing	Missing	Missing	2	0.129178	Missing	Missing	Missing	Missing
Pg1961	Missing	Missing	Missing	Missing	2	0.705445	Missing	Missing	Missing	Missing
Pg1962	Missing	Missing	Missing	Missing	2	0.168227	Missing	Missing	Missing	Missing
Pg1963	Missing	Missing	Missing	Missing	2	0.272745	Missing	Missing	Missing	Missing
Pg1964	Missing	Missing	Missing	Missing	2	0.256072	Missing	Missing	Missing	Missing
Pg1966	Missing	Missing	Missing	Missing	2	1.43878	Missing	Missing	Missing	Missing
Pg1967	Missing	Missing	Missing	Missing	2	0.408841	Missing	Missing	Missing	Missing
Pg1968	Missing	Missing	Missing	Missing	6	0.95132	Missing	Missing	Missing	Missing
Pg1969	Missing	Missing	Missing	Missing	3	0.436229	Missing	Missing	Missing	Missing
Pg1970	Missing	Missing	Missing	Missing	2	0.383201	Missing	Missing	Missing	Missing
Pg1971	Missing	Missing	Missing	Missing	2	0.0259494	Missing	Missing	Missing	Missing
Pg1972	Missing	Missing	Missing	Missing	5	0.951169	Missing	Missing	Missing	Missing
Pg1973	Missing	Missing	4	1.02316	Missing	Missing	Missing	Missing	Missing	Missing
Pg1974	Missing	Missing	Missing	Missing	2	1.08784	Missing	Missing	Missing	Missing
Pg1976	Missing	Missing	Missing	Missing	2	0.763766	Missing	Missing	Missing	Missing
Pg1977	Missing	Missing	Missing	Missing	2	0.415949	Missing	Missing	Missing	Missing
Pg1979	Missing	Missing	Missing	Missing	4	2.45766	Missing	Missing	Missing	Missing
Pg1980	Missing	Missing	Missing	Missing	4	0.468519	Missing	Missing	Missing	Missing
Pg1982	Missing	Missing	Missing	Missing	2	0.396807	Missing	Missing	Missing	Missing
Pg1984	Missing	Missing	Missing	Missing	2	0.675528	Missing	Missing	Missing	Missing
Pg1988	Missing	Missing	Missing	Missing	2	1.42554	Missing	Missing	Missing	Missing
Pg1989	Missing	Missing	Missing	Missing	2	0.846547	Missing	Missing	Missing	Missing
Pg1990	Missing	Missing	Missing	Missing	2	0.641917	Missing	Missing	Missing	Missing
Pg1991	Missing	Missing	Missing	Missing	2	0.703708	Missing	Missing	Missing	Missing
Pg1993	Missing	Missing	Missing	Missing	3	1.68545	Missing	Missing	Missing	Missing
Pg1994	Missing	Missing	Missing	Missing	4	0.203547	Missing	Missing	Missing	Missing
Pg1995	Missing	Missing	2	0.609283	Missing	Missing	Missing	Missing	Missing	Missing
Pg1999	Missing	Missing	Missing	Missing	8	0.150139	Missing	Missing	Missing	Missing
Pg2000	Missing	Missing	Missing	Missing	3	0.998632	Missing	Missing	Missing	Missing
Pg2001	Missing	Missing	Missing	Missing	4	0.27961	Missing	Missing	Missing	Missing
Pg2002	Missing	Missing	Missing	Missing	2	2.18093	Missing	Missing	Missing	Missing
Pg2003	Missing	Missing	Missing	Missing	2	0.135048	Missing	Missing	Missing	Missing
Pg2004	Missing	Missing	Missing	Missing	3	0.249803	Missing	Missing	Missing	Missing
Pg2005	Missing	Missing	Missing	Missing	3	1.21269	Missing	Missing	Missing	Missing
Pg2006	Missing	Missing	Missing	Missing	2	0.567679	Missing	Missing	Missing	Missing
Pg2008	Missing	Missing	Missing	Missing	2	1.02411	Missing	Missing	Missing	Missing
Pg2010	Missing	Missing	Missing	Missing	2	0.498161	Missing	Missing	Missing	Missing
Pg2011	Missing	Missing	Missing	Missing	2	0.563273	Missing	Missing	Missing	Missing
Pg2013	Missing	Missing	Missing	Missing	2	0.0362579	Missing	Missing	Missing	Missing
Pg2014	Missing	Missing	Missing	Missing	2	2.20257	Missing	Missing	Missing	Missing
Pg2016	Missing	Missing	Missing	Missing	2	0.230862	Missing	Missing	Missing	Missing
Pg2018	Missing	Missing	Missing	Missing	6	0.480017	Missing	Missing	Missing	Missing
Pg2019	Missing	Missing	Missing	Missing	2	0.546669	Missing	Missing	Missing	Missing
Pg2020	Missing	Missing	Missing	Missing	2	3.75606	Missing	Missing	Missing	Missing
Pg2021	Missing	Missing	2	1.04921	Missing	Missing	Missing	Missing	Missing	Missing
Pg2024	Missing	Missing	Missing	Missing	3	1.41989	Missing	Missing	Missing	Missing
Pg2025	Missing	Missing	Missing	Missing	2	0.607765	Missing	Missing	Missing	Missing
Pg2026	Missing	Missing	Missing	Missing	2	0.104535	Missing	Missing	Missing	Missing
Pg2027	Missing	Missing	Missing	Missing	2	1.39236	Missing	Missing	Missing	Missing
Pg2028	Missing	Missing	Missing	Missing	3	1.88086	Missing	Missing	Missing	Missing
Pg2029	Missing	Missing	Missing	Missing	2	1.54872	Missing	Missing	Missing	Missing
Pg2030	Missing	Missing	Missing	Missing	3	0.350057	Missing	Missing	Missing	Missing
Pg2031	Missing	Missing	Missing	Missing	4	0.389812	Missing	Missing	Missing	Missing
Pg2032	Missing	Missing	Missing	Missing	2	1.11081	Missing	Missing	Missing	Missing
Pg2033	Missing	Missing	Missing	Missing	3	0.608642	Missing	Missing	Missing	Missing
Pg2034	Missing	Missing	Missing	Missing	2	2.28459	Missing	Missing	Missing	Missing
Pg2038	Missing	Missing	Missing	Missing	2	0.265483	Missing	Missing	Missing	Missing
Pg2039	Missing	Missing	Missing	Missing	2	0.239219	Missing	Missing	Missing	Missing
Pg2040	Missing	Missing	Missing	Missing	3	0.436012	Missing	Missing	Missing	Missing
Pg2041	Missing	Missing	Missing	Missing	3	0.970291	Missing	Missing	Missing	Missing
Pg2042	Missing	Missing	Missing	Missing	2	0.152185	Missing	Missing	Missing	Missing
Pg2043	Missing	Missing	Missing	Missing	2	0.181255	Missing	Missing	Missing	Missing
Pg2045	Missing	Missing	Missing	Missing	3	0.6872	Missing	Missing	Missing	Missing
Pg2047	Missing	Missing	Missing	Missing	2	2.16955	Missing	Missing	Missing	Missing
Pg2048	Missing	Missing	2	1.19632	Missing	Missing	Missing	Missing	Missing	Missing
Pg2049	Missing	Missing	Missing	Missing	2	2.08125	Missing	Missing	Missing	Missing
Pg2051	Missing	Missing	Missing	Missing	2	2.98643	Missing	Missing	Missing	Missing
Pg2052	Missing	Missing	Missing	Missing	2	0.0958692	Missing	Missing	Missing	Missing
Pg2054	Missing	Missing	Missing	Missing	2	0.149687	Missing	Missing	Missing	Missing
Pg2055	Missing	Missing	Missing	Missing	3	0.211387	Missing	Missing	Missing	Missing
Pg2057	Missing	Missing	Missing	Missing	2	0.297697	Missing	Missing	Missing	Missing
Pg2058	Missing	Missing	Missing	Missing	3	1.56281	Missing	Missing	Missing	Missing
Pg2059	Missing	Missing	Missing	Missing	3	2.20814	Missing	Missing	Missing	Missing
Pg2060	Missing	Missing	Missing	Missing	3	3.00948	Missing	Missing	Missing	Missing
Pg2061	Missing	Missing	Missing	Missing	2	0.798258	Missing	Missing	Missing	Missing
Pg2062	Missing	Missing	Missing	Missing	2	2.06668	Missing	Missing	Missing	Missing
Pg2063	Missing	Missing	Missing	Missing	2	0.162492	Missing	Missing	Missing	Missing
Pg2065	Missing	Missing	Missing	Missing	2	0.176698	Missing	Missing	Missing	Missing
Pg2067	Missing	Missing	Missing	Missing	2	0.0936542	Missing	Missing	Missing	Missing
Pg2068	Missing	Missing	Missing	Missing	2	0.937365	Missing	Missing	Missing	Missing
Pg2071	Missing	Missing	Missing	Missing	2	1.05044	Missing	Missing	Missing	Missing
Pg2072	Missing	Missing	Missing	Missing	Missing	Missing	Missing	Missing	2	0.813677
Pg2074	Missing	Missing	Missing	Missing	2	0.126218	Missing	Missing	Missing	Missing
Pg2075	Missing	Missing	Missing	Missing	2	0.265026	Missing	Missing	Missing	Missing
Pg2078	Missing	Missing	Missing	Missing	2	0.297257	Missing	Missing	Missing	Missing
Pg2079	Missing	Missing	Missing	Missing	2	0.947259	Missing	Missing	Missing	Missing
Pg2080	Missing	Missing	Missing	Missing	2	0.20506	Missing	Missing	Missing	Missing
Pg2081	Missing	Missing	Missing	Missing	2	0.0677612	Missing	Missing	Missing	Missing
Pg2082	Missing	Missing	Missing	Missing	4	0.513111	Missing	Missing	Missing	Missing
Pg2083	Missing	Missing	Missing	Missing	2	1.87971	Missing	Missing	Missing	Missing
Pg2084	Missing	Missing	Missing	Missing	2	0.131418	Missing	Missing	Missing	Missing
Pg2086	Missing	Missing	Missing	Missing	2	0.440548	Missing	Missing	Missing	Missing
Pg2089	2	0.726683	Missing	Missing	Missing	Missing	Missing	Missing	Missing	Missing
Pg2090	Missing	Missing	Missing	Missing	2	2.95875	Missing	Missing	Missing	Missing
Pg2091	Missing	Missing	Missing	Missing	2	2.50826	Missing	Missing	Missing	Missing
Pg2092	Missing	Missing	Missing	Missing	2	0.206604	Missing	Missing	Missing	Missing
Pg2093	Missing	Missing	Missing	Missing	2	1.52056	Missing	Missing	Missing	Missing
Pg2095	2	0.966203	Missing	Missing	Missing	Missing	Missing	Missing	Missing	Missing
Pg2096	Missing	Missing	Missing	Missing	2	0.553434	Missing	Missing	Missing	Missing
Pg2098	Missing	Missing	Missing	Missing	2	0.335229	Missing	Missing	Missing	Missing
Pg2102	Missing	Missing	Missing	Missing	2	5.20876	Missing	Missing	Missing	Missing
Pg2106	Missing	Missing	Missing	Missing	2	0.111084	Missing	Missing	Missing	Missing
Pg2107	2	1.6445	Missing	Missing	Missing	Missing	Missing	Missing	Missing	Missing
Pg2109	4	1.13409	Missing	Missing	Missing	Missing	Missing	Missing	Missing	Missing
Pg2111	Missing	Missing	Missing	Missing	2	5.83729	Missing	Missing	Missing	Missing
Pg2114	Missing	Missing	Missing	Missing	Missing	Missing	2	0.013654	Missing	Missing
Pg2115	Missing	Missing	Missing	Missing	Missing	Missing	3	0.0388779	Missing	Missing
Pg2116	Missing	Missing	Missing	Missing	Missing	Missing	2	0.629827	Missing	Missing
Pg2117	Missing	Missing	Missing	Missing	Missing	Missing	2	0.268	Missing	Missing
Pg2118	Missing	Missing	Missing	Missing	Missing	Missing	2	1.54146	Missing	Missing
Pg2119	Missing	Missing	Missing	Missing	Missing	Missing	2	0.012311	Missing	Missing
Pg2120	Missing	Missing	Missing	Missing	Missing	Missing	5	0.0616531	Missing	Missing
Pg2121	Missing	Missing	Missing	Missing	Missing	Missing	2	0.0126919	Missing	Missing
Pg2125	Missing	Missing	Missing	Missing	Missing	Missing	3	0.0532254	Missing	Missing
Pg2126	Missing	Missing	Missing	Missing	Missing	Missing	2	2.50369	Missing	Missing
Pg2129	Missing	Missing	Missing	Missing	Missing	Missing	2	0.094575	Missing	Missing
Pg2130	Missing	Missing	Missing	Missing	Missing	Missing	2	0.100857	Missing	Missing
Pg2133	Missing	Missing	Missing	Missing	Missing	Missing	3	0.0789637	Missing	Missing
Pg2134	Missing	Missing	Missing	Missing	Missing	Missing	2	0.200602	Missing	Missing
Pg2135	Missing	Missing	Missing	Missing	Missing	Missing	2	0.014059	Missing	Missing
Pg2137	Missing	Missing	Missing	Missing	Missing	Missing	2	0.370896	Missing	Missing
Pg2139	Missing	Missing	Missing	Missing	Missing	Missing	4	1.70132	Missing	Missing
Pg2140	Missing	Missing	Missing	Missing	Missing	Missing	2	0.0970858	Missing	Missing
Pg2141	Missing	Missing	Missing	Missing	Missing	Missing	2	1.63882	Missing	Missing
Pg2144	Missing	Missing	Missing	Missing	Missing	Missing	2	0.356296	Missing	Missing
Pg2147	Missing	Missing	Missing	Missing	Missing	Missing	2	0.067804	Missing	Missing
Pg2151	Missing	Missing	Missing	Missing	Missing	Missing	2	0.0225644	Missing	Missing
Pg2153	2	2.26148	Missing	Missing	Missing	Missing	Missing	Missing	Missing	Missing
Pg2155	Missing	Missing	Missing	Missing	Missing	Missing	2	0.24721	Missing	Missing
Pg2156	Missing	Missing	Missing	Missing	Missing	Missing	2	0.0653537	Missing	Missing
Pg2160	Missing	Missing	Missing	Missing	Missing	Missing	2	0.996442	Missing	Missing
Pg2161	Missing	Missing	Missing	Missing	Missing	Missing	2	0.108656	Missing	Missing
Pg2162	Missing	Missing	3	1.56934	Missing	Missing	Missing	Missing	Missing	Missing
Pg2163	Missing	Missing	Missing	Missing	Missing	Missing	2	0.532081	Missing	Missing
Pg2171	Missing	Missing	Missing	Missing	Missing	Missing	Missing	Missing	4	0.455151
Pg2173	Missing	Missing	Missing	Missing	Missing	Missing	Missing	Missing	2	1.02477
Pg2174	Missing	Missing	Missing	Missing	Missing	Missing	Missing	Missing	3	0.143259
Pg2176	Missing	Missing	Missing	Missing	Missing	Missing	Missing	Missing	2	0.344082
Pg2178	Missing	Missing	Missing	Missing	Missing	Missing	Missing	Missing	3	0.0117908
Pg2179	Missing	Missing	Missing	Missing	Missing	Missing	Missing	Missing	2	1.98473
Pg2180	Missing	Missing	Missing	Missing	Missing	Missing	Missing	Missing	2	0.305178
Pg2183	Missing	Missing	Missing	Missing	Missing	Missing	Missing	Missing	2	1.42228
Pg2184	Missing	Missing	Missing	Missing	Missing	Missing	Missing	Missing	3	0.0710283
Pg2185	Missing	Missing	Missing	Missing	Missing	Missing	Missing	Missing	2	0.0934894
Pg2187	Missing	Missing	Missing	Missing	Missing	Missing	Missing	Missing	2	0.528238
Pg2188	Missing	Missing	Missing	Missing	Missing	Missing	Missing	Missing	2	0.321586
Pg2194	Missing	Missing	Missing	Missing	Missing	Missing	Missing	Missing	2	0.0869221
Pg2198	Missing	Missing	Missing	Missing	Missing	Missing	Missing	Missing	2	0.0939713
Pg2200	Missing	Missing	4	1.18639	Missing	Missing	Missing	Missing	Missing	Missing
Pg2201	43	0.502761	Missing	Missing	Missing	Missing	Missing	Missing	Missing	Missing
Pg2202	135	2.189	Missing	Missing	Missing	Missing	Missing	Missing	Missing	Missing
Pg2203	3	0.561876	Missing	Missing	Missing	Missing	Missing	Missing	Missing	Missing
Pg2204	6	2.89391	Missing	Missing	Missing	Missing	Missing	Missing	Missing	Missing
Pg2205	4	1.61065	Missing	Missing	Missing	Missing	Missing	Missing	Missing	Missing
Pg2206	2	8.16699	Missing	Missing	Missing	Missing	Missing	Missing	Missing	Missing
Pg2207	4	2.01628	Missing	Missing	Missing	Missing	Missing	Missing	Missing	Missing
Pg2208	2	1.75086	Missing	Missing	Missing	Missing	Missing	Missing	Missing	Missing
Pg2209	52	3.14877	Missing	Missing	Missing	Missing	Missing	Missing	Missing	Missing
Pg2210	3	1.21404	Missing	Missing	Missing	Missing	Missing	Missing	Missing	Missing
Pg2211	2	0.0503565	Missing	Missing	Missing	Missing	Missing	Missing	Missing	Missing
Pg2212	69	0.51227	Missing	Missing	Missing	Missing	Missing	Missing	Missing	Missing
Pg2213	47	0.381478	Missing	Missing	Missing	Missing	Missing	Missing	Missing	Missing
Pg2214	2	3.56208	Missing	Missing	Missing	Missing	Missing	Missing	Missing	Missing
Pg2215	32	0.110155	Missing	Missing	Missing	Missing	Missing	Missing	Missing	Missing
Pg2216	2	1.90776	Missing	Missing	Missing	Missing	Missing	Missing	Missing	Missing
Pg2217	3	0.402482	Missing	Missing	Missing	Missing	Missing	Missing	Missing	Missing
Pg2218	3	1.26775	Missing	Missing	Missing	Missing	Missing	Missing	Missing	Missing
Pg2219	15	0.28596	Missing	Missing	Missing	Missing	Missing	Missing	Missing	Missing
Pg2220	3	3.6835	Missing	Missing	Missing	Missing	Missing	Missing	Missing	Missing
Pg2221	2	3.1061	Missing	Missing	Missing	Missing	Missing	Missing	Missing	Missing
Pg2222	5	4.83006	Missing	Missing	Missing	Missing	Missing	Missing	Missing	Missing
Pg2224	32	1.87729	Missing	Missing	Missing	Missing	Missing	Missing	Missing	Missing
Pg2225	2	1.5132	Missing	Missing	Missing	Missing	Missing	Missing	Missing	Missing
Pg2226	11	1.18439	Missing	Missing	Missing	Missing	Missing	Missing	Missing	Missing
Pg2227	2	3.54885	2	0.809195	Missing	Missing	Missing	Missing	Missing	Missing
Pg2228	6	0.674106	Missing	Missing	Missing	Missing	Missing	Missing	Missing	Missing
Pg2229	8	0.0560645	Missing	Missing	Missing	Missing	Missing	Missing	Missing	Missing
Pg2230	6	3.15522	Missing	Missing	Missing	Missing	Missing	Missing	Missing	Missing
Pg2231	14	0.576165	Missing	Missing	Missing	Missing	Missing	Missing	Missing	Missing
Pg2232	5	0.633657	Missing	Missing	Missing	Missing	Missing	Missing	Missing	Missing
Pg2233	8	1.20327	Missing	Missing	Missing	Missing	Missing	Missing	Missing	Missing
Pg2234	20	1.15825	Missing	Missing	Missing	Missing	Missing	Missing	Missing	Missing
Pg2235	15	0.917719	Missing	Missing	Missing	Missing	Missing	Missing	Missing	Missing
Pg2236	13	0.195443	Missing	Missing	Missing	Missing	Missing	Missing	Missing	Missing
Pg2238	25	0.829908	Missing	Missing	Missing	Missing	Missing	Missing	Missing	Missing
Pg2239	27	0.13361	Missing	Missing	Missing	Missing	Missing	Missing	Missing	Missing
Pg2240	12	0.41513	Missing	Missing	Missing	Missing	Missing	Missing	Missing	Missing
Pg2241	2	3.64187	Missing	Missing	Missing	Missing	Missing	Missing	Missing	Missing
Pg2243	34	4.58994	Missing	Missing	Missing	Missing	Missing	Missing	Missing	Missing
Pg2244	2	1.58282	Missing	Missing	Missing	Missing	Missing	Missing	Missing	Missing
Pg2246	3	2.35314	Missing	Missing	Missing	Missing	Missing	Missing	Missing	Missing
Pg2247	6	0.481573	Missing	Missing	Missing	Missing	Missing	Missing	Missing	Missing
Pg2248	4	2.77975	Missing	Missing	Missing	Missing	Missing	Missing	Missing	Missing
Pg2250	9	0.702382	Missing	Missing	Missing	Missing	Missing	Missing	Missing	Missing
Pg2251	2	3.89927	Missing	Missing	Missing	Missing	Missing	Missing	Missing	Missing
Pg2252	2	2.63479	Missing	Missing	Missing	Missing	Missing	Missing	Missing	Missing
Pg2253	2	0.582736	Missing	Missing	Missing	Missing	Missing	Missing	Missing	Missing
Pg2254	6	0.847273	Missing	Missing	Missing	Missing	Missing	Missing	Missing	Missing
Pg2255	5	4.9879	Missing	Missing	Missing	Missing	Missing	Missing	Missing	Missing
Pg2256	42	0.706472	Missing	Missing	Missing	Missing	Missing	Missing	Missing	Missing
Pg2258	12	0.223217	Missing	Missing	Missing	Missing	Missing	Missing	Missing	Missing
Pg2259	2	1.28865	Missing	Missing	Missing	Missing	Missing	Missing	Missing	Missing
Pg2260	8	1.95228	Missing	Missing	Missing	Missing	Missing	Missing	Missing	Missing
Pg2261	2	0.113276	Missing	Missing	Missing	Missing	Missing	Missing	Missing	Missing
Pg2262	6	2.71339	Missing	Missing	Missing	Missing	Missing	Missing	Missing	Missing
Pg2263	3	2.26077	Missing	Missing	Missing	Missing	Missing	Missing	Missing	Missing
Pg2264	3	3.31585	Missing	Missing	Missing	Missing	Missing	Missing	Missing	Missing
Pg2265	5	2.03744	Missing	Missing	Missing	Missing	Missing	Missing	Missing	Missing
Pg2266	2	0.313705	Missing	Missing	Missing	Missing	Missing	Missing	Missing	Missing
Pg2267	2	0.449142	Missing	Missing	Missing	Missing	Missing	Missing	Missing	Missing
Pg2268	2	0.337701	Missing	Missing	Missing	Missing	Missing	Missing	Missing	Missing
Pg2269	2	2.07361	Missing	Missing	Missing	Missing	Missing	Missing	Missing	Missing
Pg2270	2	0.875515	Missing	Missing	Missing	Missing	Missing	Missing	Missing	Missing
Pg2271	3	1.58837	Missing	Missing	Missing	Missing	Missing	Missing	Missing	Missing
Pg2273	5	1.19107	Missing	Missing	Missing	Missing	Missing	Missing	Missing	Missing
Pg2274	4	0.107092	Missing	Missing	Missing	Missing	Missing	Missing	Missing	Missing
Pg2275	3	1.28321	Missing	Missing	Missing	Missing	Missing	Missing	Missing	Missing
Pg2276	2	3.69488	Missing	Missing	Missing	Missing	Missing	Missing	Missing	Missing
Pg2277	3	0.919026	Missing	Missing	Missing	Missing	Missing	Missing	Missing	Missing
Pg2278	6	0.124029	Missing	Missing	Missing	Missing	Missing	Missing	Missing	Missing
Pg2279	13	0.574705	Missing	Missing	Missing	Missing	Missing	Missing	Missing	Missing
Pg2280	3	1.81726	Missing	Missing	Missing	Missing	Missing	Missing	Missing	Missing
Pg2281	2	2.68505	2	2.7898	Missing	Missing	Missing	Missing	Missing	Missing
Pg2282	2	1.04716	Missing	Missing	Missing	Missing	Missing	Missing	Missing	Missing
Pg2283	3	1.24861	Missing	Missing	Missing	Missing	Missing	Missing	Missing	Missing
Pg2285	2	0.617926	Missing	Missing	Missing	Missing	Missing	Missing	Missing	Missing
Pg2287	2	0.965525	Missing	Missing	Missing	Missing	Missing	Missing	Missing	Missing
Pg2288	6	3.07308	Missing	Missing	Missing	Missing	Missing	Missing	Missing	Missing
Pg2290	2	0.170312	Missing	Missing	Missing	Missing	Missing	Missing	Missing	Missing
Pg2291	8	0.391091	Missing	Missing	Missing	Missing	Missing	Missing	Missing	Missing
Pg2293	2	3.52846	Missing	Missing	Missing	Missing	Missing	Missing	Missing	Missing
Pg2294	14	1.13341	Missing	Missing	Missing	Missing	Missing	Missing	Missing	Missing
Pg2295	2	1.11918	Missing	Missing	Missing	Missing	Missing	Missing	Missing	Missing
Pg2296	2	0.997216	Missing	Missing	Missing	Missing	Missing	Missing	Missing	Missing
Pg2297	2	2.11066	Missing	Missing	Missing	Missing	Missing	Missing	Missing	Missing
Pg2298	3	0.748742	Missing	Missing	Missing	Missing	Missing	Missing	Missing	Missing
Pg2299	9	0.560274	Missing	Missing	Missing	Missing	Missing	Missing	Missing	Missing
Pg2300	2	1.35834	Missing	Missing	Missing	Missing	Missing	Missing	Missing	Missing
Pg2301	8	0.102834	Missing	Missing	Missing	Missing	Missing	Missing	Missing	Missing
Pg2302	4	1.47889	Missing	Missing	Missing	Missing	Missing	Missing	Missing	Missing
Pg2303	2	0.474845	Missing	Missing	Missing	Missing	Missing	Missing	Missing	Missing
Pg2304	7	0.657222	Missing	Missing	Missing	Missing	Missing	Missing	Missing	Missing
Pg2305	4	0.994159	Missing	Missing	Missing	Missing	Missing	Missing	Missing	Missing
Pg2307	4	0.681477	Missing	Missing	Missing	Missing	Missing	Missing	Missing	Missing
Pg2308	23	0.578166	Missing	Missing	Missing	Missing	Missing	Missing	Missing	Missing
Pg2309	2	2.18194	Missing	Missing	Missing	Missing	Missing	Missing	Missing	Missing
Pg2310	3	0.250091	Missing	Missing	Missing	Missing	Missing	Missing	Missing	Missing
Pg2311	2	1.6968	Missing	Missing	Missing	Missing	Missing	Missing	Missing	Missing
Pg2312	6	1.08413	Missing	Missing	Missing	Missing	Missing	Missing	Missing	Missing
Pg2313	7	1.3792	Missing	Missing	Missing	Missing	Missing	Missing	Missing	Missing
Pg2314	2	6.07237	Missing	Missing	Missing	Missing	Missing	Missing	Missing	Missing
Pg2316	3	0.2405	Missing	Missing	Missing	Missing	Missing	Missing	Missing	Missing
Pg2317	6	2.70197	Missing	Missing	Missing	Missing	Missing	Missing	Missing	Missing
Pg2318	11	0.293694	Missing	Missing	Missing	Missing	Missing	Missing	Missing	Missing
Pg2319	2	4.49612	Missing	Missing	Missing	Missing	Missing	Missing	Missing	Missing
Pg2320	2	0.174067	Missing	Missing	Missing	Missing	Missing	Missing	Missing	Missing
Pg2321	4	0.158619	Missing	Missing	Missing	Missing	Missing	Missing	Missing	Missing
Pg2322	3	0.875527	Missing	Missing	Missing	Missing	Missing	Missing	Missing	Missing
Pg2324	5	0.077068	Missing	Missing	Missing	Missing	Missing	Missing	Missing	Missing
Pg2325	5	0.705394	Missing	Missing	Missing	Missing	Missing	Missing	Missing	Missing
Pg2326	2	4.14033	Missing	Missing	Missing	Missing	Missing	Missing	Missing	Missing
Pg2327	2	1.21286	Missing	Missing	Missing	Missing	Missing	Missing	Missing	Missing
Pg2328	4	0.512576	Missing	Missing	Missing	Missing	Missing	Missing	Missing	Missing
Pg2329	6	2.11029	Missing	Missing	Missing	Missing	Missing	Missing	Missing	Missing
Pg2330	2	2.54348	Missing	Missing	Missing	Missing	Missing	Missing	Missing	Missing
Pg2331	2	0.197706	Missing	Missing	Missing	Missing	Missing	Missing	Missing	Missing
Pg2332	7	0.0884576	Missing	Missing	Missing	Missing	Missing	Missing	Missing	Missing
Pg2333	3	1.18262	Missing	Missing	Missing	Missing	Missing	Missing	Missing	Missing
Pg2334	9	0.237885	Missing	Missing	Missing	Missing	Missing	Missing	Missing	Missing
Pg2335	3	0.221764	Missing	Missing	Missing	Missing	Missing	Missing	Missing	Missing
Pg2336	5	0.579226	Missing	Missing	Missing	Missing	Missing	Missing	Missing	Missing
Pg2338	5	0.417517	Missing	Missing	Missing	Missing	Missing	Missing	Missing	Missing
Pg2339	4	2.21675	Missing	Missing	Missing	Missing	Missing	Missing	Missing	Missing
Pg2340	2	1.15288	Missing	Missing	Missing	Missing	Missing	Missing	Missing	Missing
Pg2341	2	2.74933	Missing	Missing	Missing	Missing	Missing	Missing	Missing	Missing
Pg2342	4	0.287913	Missing	Missing	Missing	Missing	Missing	Missing	Missing	Missing
Pg2343	2	1.82496	Missing	Missing	Missing	Missing	Missing	Missing	Missing	Missing
Pg2344	2	0.782791	Missing	Missing	Missing	Missing	Missing	Missing	Missing	Missing
Pg2346	2	3.1133	Missing	Missing	Missing	Missing	Missing	Missing	Missing	Missing
Pg2347	2	0.17452	Missing	Missing	Missing	Missing	Missing	Missing	Missing	Missing
Pg2349	2	0.131551	Missing	Missing	Missing	Missing	Missing	Missing	Missing	Missing
Pg2351	2	1.16514	Missing	Missing	Missing	Missing	Missing	Missing	Missing	Missing
Pg2352	5	0.301914	Missing	Missing	Missing	Missing	Missing	Missing	Missing	Missing
Pg2353	2	2.63241	Missing	Missing	Missing	Missing	Missing	Missing	Missing	Missing
Pg2354	8	1.51535	Missing	Missing	Missing	Missing	Missing	Missing	Missing	Missing
Pg2355	4	0.750861	Missing	Missing	Missing	Missing	Missing	Missing	Missing	Missing
Pg2356	2	1.73089	Missing	Missing	Missing	Missing	Missing	Missing	Missing	Missing
Pg2357	2	1.75054	Missing	Missing	Missing	Missing	Missing	Missing	Missing	Missing
Pg2358	2	0.427025	Missing	Missing	Missing	Missing	Missing	Missing	Missing	Missing
Pg2359	2	1.5051	Missing	Missing	Missing	Missing	Missing	Missing	Missing	Missing
Pg2360	3	1.19254	Missing	Missing	Missing	Missing	Missing	Missing	Missing	Missing
Pg2362	2	0.623326	Missing	Missing	Missing	Missing	Missing	Missing	Missing	Missing
Pg2363	2	0.652612	Missing	Missing	Missing	Missing	Missing	Missing	Missing	Missing
Pg2364	2	0.43878	Missing	Missing	Missing	Missing	Missing	Missing	Missing	Missing
Pg2366	2	1.49727	Missing	Missing	Missing	Missing	Missing	Missing	Missing	Missing
Pg2367	2	0.207613	Missing	Missing	Missing	Missing	Missing	Missing	Missing	Missing
Pg2368	4	1.53596	Missing	Missing	Missing	Missing	Missing	Missing	Missing	Missing
Pg2369	3	1.41827	Missing	Missing	Missing	Missing	Missing	Missing	Missing	Missing
Pg2370	2	1.88711	Missing	Missing	Missing	Missing	Missing	Missing	Missing	Missing
Pg2371	2	1.3852	Missing	Missing	Missing	Missing	Missing	Missing	Missing	Missing
Pg2372	3	1.34551	Missing	Missing	Missing	Missing	Missing	Missing	Missing	Missing
Pg2373	2	1.36281	Missing	Missing	Missing	Missing	Missing	Missing	Missing	Missing
Pg2374	2	0.373526	Missing	Missing	Missing	Missing	Missing	Missing	Missing	Missing
Pg2375	2	1.37756	Missing	Missing	Missing	Missing	Missing	Missing	Missing	Missing
Pg2376	2	0.794182	Missing	Missing	Missing	Missing	Missing	Missing	Missing	Missing
Pg2377	4	4.71252	Missing	Missing	Missing	Missing	Missing	Missing	Missing	Missing
Pg2379	2	1.00569	Missing	Missing	Missing	Missing	Missing	Missing	Missing	Missing
Pg2381	2	2.08083	Missing	Missing	Missing	Missing	Missing	Missing	Missing	Missing
Pg2382	2	4.86886	Missing	Missing	Missing	Missing	Missing	Missing	Missing	Missing
Pg2383	3	1.73239	Missing	Missing	Missing	Missing	Missing	Missing	Missing	Missing
Pg2385	2	1.82676	Missing	Missing	Missing	Missing	Missing	Missing	Missing	Missing
Pg2386	2	2.22602	Missing	Missing	Missing	Missing	Missing	Missing	Missing	Missing
Pg2387	2	0.774811	Missing	Missing	Missing	Missing	Missing	Missing	Missing	Missing
Pg2388	2	3.87672	Missing	Missing	Missing	Missing	Missing	Missing	Missing	Missing
Pg2389	2	0.808233	Missing	Missing	Missing	Missing	Missing	Missing	Missing	Missing
Pg2390	3	3.03791	Missing	Missing	Missing	Missing	Missing	Missing	Missing	Missing
Pg2391	2	0.205677	Missing	Missing	Missing	Missing	Missing	Missing	Missing	Missing
Pg2392	3	0.847495	Missing	Missing	Missing	Missing	Missing	Missing	Missing	Missing
Pg2393	2	0.23011	Missing	Missing	Missing	Missing	Missing	Missing	Missing	Missing
Pg2394	2	2.9426	Missing	Missing	Missing	Missing	Missing	Missing	Missing	Missing
Pg2395	2	1.17516	Missing	Missing	Missing	Missing	Missing	Missing	Missing	Missing
Pg2397	2	1.23296	Missing	Missing	Missing	Missing	Missing	Missing	Missing	Missing
Pg2398	2	0.0748902	Missing	Missing	Missing	Missing	Missing	Missing	Missing	Missing
Pg2399	2	0.626213	Missing	Missing	Missing	Missing	Missing	Missing	Missing	Missing
Pg2401	2	0.841514	Missing	Missing	Missing	Missing	Missing	Missing	Missing	Missing
Pg2402	2	3.10287	Missing	Missing	Missing	Missing	Missing	Missing	Missing	Missing
Pg2403	2	0.867905	Missing	Missing	Missing	Missing	Missing	Missing	Missing	Missing
Pg2404	2	3.01449	Missing	Missing	Missing	Missing	Missing	Missing	Missing	Missing
Pg2405	2	0.0582313	Missing	Missing	Missing	Missing	Missing	Missing	Missing	Missing
Pg2406	2	0.0578037	Missing	Missing	Missing	Missing	Missing	Missing	Missing	Missing
Pg2409	Missing	Missing	3	1.68076	Missing	Missing	Missing	Missing	Missing	Missing
Pg2410	2	2.64834	Missing	Missing	Missing	Missing	Missing	Missing	Missing	Missing
Pg2411	Missing	Missing	40	0.885399	Missing	Missing	Missing	Missing	Missing	Missing
Pg2412	Missing	Missing	18	0.0920681	Missing	Missing	Missing	Missing	Missing	Missing
Pg2413	Missing	Missing	6	2.04209	Missing	Missing	Missing	Missing	Missing	Missing
Pg2414	Missing	Missing	10	0.0637447	Missing	Missing	Missing	Missing	Missing	Missing
Pg2415	Missing	Missing	2	0.946202	Missing	Missing	Missing	Missing	Missing	Missing
Pg2417	Missing	Missing	5	0.535753	Missing	Missing	Missing	Missing	Missing	Missing
Pg2418	Missing	Missing	19	0.087871	Missing	Missing	Missing	Missing	Missing	Missing
Pg2419	Missing	Missing	2	1.05603	Missing	Missing	Missing	Missing	Missing	Missing
Pg2420	Missing	Missing	3	1.59351	Missing	Missing	Missing	Missing	Missing	Missing
Pg2422	Missing	Missing	4	0.314716	Missing	Missing	Missing	Missing	Missing	Missing
Pg2423	Missing	Missing	2	0.251622	Missing	Missing	Missing	Missing	Missing	Missing
Pg2424	Missing	Missing	5	0.134958	Missing	Missing	Missing	Missing	Missing	Missing
Pg2425	Missing	Missing	10	0.0561303	Missing	Missing	Missing	Missing	Missing	Missing
Pg2426	Missing	Missing	8	0.0748219	Missing	Missing	Missing	Missing	Missing	Missing
Pg2428	Missing	Missing	5	0.463132	Missing	Missing	Missing	Missing	Missing	Missing
Pg2429	Missing	Missing	4	0.311877	Missing	Missing	Missing	Missing	Missing	Missing
Pg2430	Missing	Missing	3	1.55669	Missing	Missing	Missing	Missing	Missing	Missing
Pg2431	Missing	Missing	4	2.15533	Missing	Missing	Missing	Missing	Missing	Missing
Pg2432	Missing	Missing	2	0.357302	Missing	Missing	Missing	Missing	Missing	Missing
Pg2433	Missing	Missing	5	1.40319	Missing	Missing	Missing	Missing	Missing	Missing
Pg2434	Missing	Missing	3	3.47275	Missing	Missing	Missing	Missing	Missing	Missing
Pg2435	Missing	Missing	2	1.64927	Missing	Missing	Missing	Missing	Missing	Missing
Pg2436	Missing	Missing	4	0.618884	Missing	Missing	Missing	Missing	Missing	Missing
Pg2439	Missing	Missing	8	0.338685	Missing	Missing	Missing	Missing	Missing	Missing
Pg2440	Missing	Missing	12	0.0492967	Missing	Missing	Missing	Missing	Missing	Missing
Pg2441	Missing	Missing	22	0.872904	Missing	Missing	Missing	Missing	Missing	Missing
Pg2442	Missing	Missing	35	0.0594627	Missing	Missing	Missing	Missing	Missing	Missing
Pg2443	Missing	Missing	4	0.835416	Missing	Missing	Missing	Missing	Missing	Missing
Pg2444	Missing	Missing	6	0.142194	Missing	Missing	Missing	Missing	Missing	Missing
Pg2445	Missing	Missing	4	0.396176	Missing	Missing	Missing	Missing	Missing	Missing
Pg2447	Missing	Missing	2	0.0275298	Missing	Missing	Missing	Missing	Missing	Missing
Pg2448	Missing	Missing	2	0.147978	Missing	Missing	Missing	Missing	Missing	Missing
Pg2449	Missing	Missing	11	0.236151	Missing	Missing	Missing	Missing	Missing	Missing
Pg2450	Missing	Missing	2	1.72714	Missing	Missing	Missing	Missing	Missing	Missing
Pg2451	Missing	Missing	3	0.0572473	Missing	Missing	Missing	Missing	Missing	Missing
Pg2453	Missing	Missing	7	1.06954	Missing	Missing	Missing	Missing	Missing	Missing
Pg2454	Missing	Missing	5	0.263627	Missing	Missing	Missing	Missing	Missing	Missing
Pg2455	Missing	Missing	13	0.155088	Missing	Missing	Missing	Missing	Missing	Missing
Pg2456	Missing	Missing	2	0.180533	Missing	Missing	Missing	Missing	Missing	Missing
Pg2457	Missing	Missing	2	0.676077	Missing	Missing	Missing	Missing	Missing	Missing
Pg2461	Missing	Missing	2	1.63186	Missing	Missing	Missing	Missing	Missing	Missing
Pg2462	Missing	Missing	5	0.690233	Missing	Missing	Missing	Missing	Missing	Missing
Pg2464	Missing	Missing	3	0.0266536	Missing	Missing	Missing	Missing	Missing	Missing
Pg2465	Missing	Missing	3	1.02414	Missing	Missing	Missing	Missing	Missing	Missing
Pg2466	Missing	Missing	2	1.07288	Missing	Missing	Missing	Missing	Missing	Missing
Pg2467	Missing	Missing	3	1.68119	Missing	Missing	Missing	Missing	Missing	Missing
Pg2468	Missing	Missing	12	1.35278	Missing	Missing	Missing	Missing	Missing	Missing
Pg2469	Missing	Missing	7	1.52227	Missing	Missing	Missing	Missing	Missing	Missing
Pg2471	Missing	Missing	2	0.0111313	Missing	Missing	Missing	Missing	Missing	Missing
Pg2472	Missing	Missing	2	0.368255	Missing	Missing	Missing	Missing	Missing	Missing
Pg2474	Missing	Missing	4	1.0991	Missing	Missing	Missing	Missing	Missing	Missing
Pg2475	Missing	Missing	2	0.0116063	Missing	Missing	Missing	Missing	Missing	Missing
Pg2476	Missing	Missing	2	1.36198	Missing	Missing	Missing	Missing	Missing	Missing
Pg2477	Missing	Missing	2	0.374311	Missing	Missing	Missing	Missing	Missing	Missing
Pg2479	Missing	Missing	2	0.358207	Missing	Missing	Missing	Missing	Missing	Missing
Pg2481	Missing	Missing	3	0.79717	Missing	Missing	Missing	Missing	Missing	Missing
Pg2482	Missing	Missing	6	1.87314	Missing	Missing	Missing	Missing	Missing	Missing
Pg2483	Missing	Missing	2	0.522314	Missing	Missing	Missing	Missing	Missing	Missing
Pg2485	Missing	Missing	2	0.0133508	Missing	Missing	Missing	Missing	Missing	Missing
Pg2486	Missing	Missing	2	0.0260619	Missing	Missing	Missing	Missing	Missing	Missing
Pg2489	Missing	Missing	2	1.31399	Missing	Missing	Missing	Missing	Missing	Missing
Pg2490	Missing	Missing	2	0.661481	Missing	Missing	Missing	Missing	Missing	Missing
Pg2491	Missing	Missing	2	2.13632	Missing	Missing	Missing	Missing	Missing	Missing
Pg2492	Missing	Missing	2	0.0488121	Missing	Missing	Missing	Missing	Missing	Missing
Pg2493	Missing	Missing	4	0.708705	Missing	Missing	Missing	Missing	Missing	Missing
Pg2495	Missing	Missing	2	0.151578	Missing	Missing	Missing	Missing	Missing	Missing
Pg2496	Missing	Missing	2	0.284607	Missing	Missing	Missing	Missing	Missing	Missing
Pg2497	Missing	Missing	2	0.157218	Missing	Missing	Missing	Missing	Missing	Missing
Pg2498	Missing	Missing	3	2.5415	Missing	Missing	Missing	Missing	Missing	Missing
Pg2499	Missing	Missing	2	0.921405	Missing	Missing	Missing	Missing	Missing	Missing
Pg2500	Missing	Missing	2	1.95321	Missing	Missing	Missing	Missing	Missing	Missing
Pg2501	Missing	Missing	3	0.303771	Missing	Missing	Missing	Missing	Missing	Missing
Pg2502	Missing	Missing	2	0.278998	Missing	Missing	Missing	Missing	Missing	Missing
Pg2505	Missing	Missing	3	6.41078	Missing	Missing	Missing	Missing	Missing	Missing
Pg2506	Missing	Missing	2	1.23065	Missing	Missing	Missing	Missing	Missing	Missing
Pg2507	Missing	Missing	2	0.245402	Missing	Missing	Missing	Missing	Missing	Missing
Pg2508	Missing	Missing	2	0.490325	Missing	Missing	Missing	Missing	Missing	Missing
Pg2510	Missing	Missing	2	0.11225	Missing	Missing	Missing	Missing	Missing	Missing
Pg2511	Missing	Missing	2	2.32715	Missing	Missing	Missing	Missing	Missing	Missing
Pg2512	Missing	Missing	2	0.660897	Missing	Missing	Missing	Missing	Missing	Missing
Pg2513	Missing	Missing	2	0.364361	Missing	Missing	Missing	Missing	Missing	Missing
Pg2514	Missing	Missing	2	0.135536	Missing	Missing	Missing	Missing	Missing	Missing
Pg2515	Missing	Missing	3	0.286459	Missing	Missing	Missing	Missing	Missing	Missing
Pg2516	Missing	Missing	2	1.05823	Missing	Missing	Missing	Missing	Missing	Missing
Pg2517	Missing	Missing	2	4.55912	Missing	Missing	Missing	Missing	Missing	Missing
Pg2518	Missing	Missing	2	2.55601	Missing	Missing	Missing	Missing	Missing	Missing
Pg2519	Missing	Missing	2	0.713114	Missing	Missing	Missing	Missing	Missing	Missing
Pg2520	Missing	Missing	3	1.01028	Missing	Missing	Missing	Missing	Missing	Missing
Pg2521	Missing	Missing	2	0.137596	Missing	Missing	Missing	Missing	Missing	Missing
Pg2523	Missing	Missing	2	0.116189	Missing	Missing	Missing	Missing	Missing	Missing
Pg2524	Missing	Missing	2	2.1724	Missing	Missing	Missing	Missing	Missing	Missing
Pg2527	Missing	Missing	2	1.94107	Missing	Missing	Missing	Missing	Missing	Missing
Pg2528	Missing	Missing	2	0.356681	Missing	Missing	Missing	Missing	Missing	Missing
Pg2529	Missing	Missing	3	1.51505	Missing	Missing	Missing	Missing	Missing	Missing
Pg2530	Missing	Missing	3	1.88901	Missing	Missing	Missing	Missing	Missing	Missing
Pg2532	Missing	Missing	2	1.13342	Missing	Missing	Missing	Missing	Missing	Missing
Pg2534	Missing	Missing	2	2.08227	Missing	Missing	Missing	Missing	Missing	Missing
Pg2535	Missing	Missing	2	0.507649	Missing	Missing	Missing	Missing	Missing	Missing
Pg2536	Missing	Missing	2	1.36638	Missing	Missing	Missing	Missing	Missing	Missing
Pg2537	Missing	Missing	2	0.792816	Missing	Missing	Missing	Missing	Missing	Missing
Pg2538	Missing	Missing	2	1.87872	Missing	Missing	Missing	Missing	Missing	Missing
Pg2539	Missing	Missing	2	1.19519	Missing	Missing	Missing	Missing	Missing	Missing
Pg2540	Missing	Missing	2	7.64183	Missing	Missing	Missing	Missing	Missing	Missing
Pg2541	Missing	Missing	2	1.25742	Missing	Missing	Missing	Missing	Missing	Missing
Pg2542	Missing	Missing	2	0.371551	Missing	Missing	Missing	Missing	Missing	Missing

## Sheet: Supplementary Table  9
Supplementary Table 9. Orthologs identified in the five perennial Glycine species.
G. falcata	G. stenophita	G. cyrtoloba	G. syndetika	G. tomentella
Gfa1g000001	.	.	.	.
Gfa1g000002	Gst3g005460	Gcy3g005492	Gsy3g005633	Gto3g006384
Gfa1g000003	.	.	.	.
Gfa1g000004	.	.	.	.
Gfa1g000005	.	.	.	.
Gfa1g000006	.	.	.	.
Gfa1g000007	.	.	.	.
Gfa1g000008	.	.	.	.
Gfa1g000009	.	.	.	.
Gfa1g000010	.	.	.	.
Gfa1g000011	.	.	.	.
Gfa1g000012	Gst8g020638	Gcy8g018588	Gsy8g020517	Gto10g028044
Gfa1g000013	.	.	Gsy18g047492	.
Gfa1g000014	.	.	.	.
Gfa1g000015	.	Gcy1g000851	Gsy18g047487	Gto19g052344
Gfa1g000016	Gst18g047895	Gcy1g000852	Gsy18g047486	Gto19g052343
Gfa1g000017	Gst18g048111	Gcy1g000828	.	Gto19g052466
Gfa1g000018	.	.	.	.
Gfa1g000019	Gst18g048112	Gcy1g000830	.	Gto19g052467
Gfa1g000020	Gst1g000002	Gcy18g049344	.	Gto1g000003
Gfa1g000021	Gst1g000003	Gcy18g049341	Gsy1g000001	.
Gfa1g000022	.	.	.	.
Gfa1g000023	Gst1g000004	Gcy18g049340	Gsy1g000002	Gto1g000005
Gfa1g000024	Gst1g000006	Gcy18g049339	Gsy1g000004	Gto1g000007
Gfa1g000025	Gst1g000007	Gcy18g049338	Gsy1g000005	Gto1g000009
Gfa1g000026	Gst1g000008	Gcy18g049335	Gsy1g000006	Gto1g000010
Gfa1g000027	.	Gcy18g049336	.	.
Gfa1g000028	Gst1g000009	Gcy18g049337	Gsy1g000007	Gto1g000011
Gfa1g000029	Gst1g000013	Gcy18g049333	Gsy1g000009	Gto1g000013
Gfa1g000030	Gst1g000014	Gcy18g049332	Gsy1g000010	Gto1g000014
Gfa1g000031	Gst1g000015	Gcy18g049331	Gsy1g000011	Gto1g000015
Gfa1g000032	Gst1g000016	Gcy18g049330	Gsy1g000012	Gto1g000016
Gfa1g000033	Gst1g000017	.	.	.
Gfa1g000034	Gst1g000018	Gcy18g049329	Gsy1g000013	Gto1g000017
Gfa1g000035	Gst1g000019	Gcy18g049328	Gsy1g000015	Gto1g000018
Gfa1g000036	Gst1g000024	Gcy18g049321	Gsy1g000021	Gto1g000024
Gfa1g000037	Gst1g000025	Gcy18g049322	Gsy1g000022	Gto17g048178
Gfa1g000038	Gst1g000027	Gcy18g049319	Gsy1g000024	Gto1g000026
Gfa1g000039	.	.	.	.
Gfa1g000040	Gst1g000028	Gcy18g049318	Gsy1g000025	Gto1g000582
Gfa1g000041	.	.	.	Gto4g010026
Gfa1g000042	.	.	.	.
Gfa1g000043	.	.	.	.
Gfa1g000044	.	.	Gsy14g037136	Gto14g037962
Gfa1g000045	Gst1g000030	Gcy18g049317	Gsy1g000026	Gto1g000028
Gfa1g000046	Gst1g000031	.	Gsy1g000027	Gto1g000029
Gfa1g000047	Gst1g000032	Gcy4g008720	Gsy1g000029	.
Gfa1g000048	.	.	Gsy1g000030	Gto1g000031
Gfa1g000049	Gst1g000035	.	Gsy1g000033	Gto1g000034
Gfa1g000050	Gst1g000036	Gcy6g012648	Gsy1g000034	Gto1g000035
Gfa1g000051	.	.	.	.
Gfa1g000052	.	.	.	.
Gfa1g000053	Gst1g000037	Gcy18g049314	Gsy1g000036	Gto1g000037
Gfa1g000054	Gst1g000038	Gcy18g049313	Gsy1g000037	Gto1g000038
Gfa1g000055	Gst1g000042	Gcy18g049312	Gsy1g000039	Gto1g000041
Gfa1g000056	Gst1g000044	Gcy18g049311	Gsy1g000041	Gto1g000042
Gfa1g000057	Gst1g000045	Gcy18g049310	Gsy1g000042	Gto1g000043
Gfa1g000058	Gst1g000046	Gcy18g049309	Gsy1g000043	Gto1g000044
Gfa1g000059	Gst1g000047	Gcy18g049308	Gsy1g000044	Gto1g000045
Gfa1g000060	Gst1g000048	Gcy18g049305	Gsy1g000045	.
Gfa1g000061	Gst1g000049	Gcy15g040119	Gsy19g050032	Gto1g000049
Gfa1g000062	.	.	.	Gto1g000050
Gfa1g000063	Gst1g000050	Gcy18g049304	Gsy1g000047	Gto1g000052
Gfa1g000064	Gst1g000051	Gcy18g049303	Gsy1g000048	Gto1g000053
Gfa1g000065	Gst1g000052	Gcy18g049301	Gsy1g000049	Gto1g000054
Gfa1g000066	.	.	.	.
Gfa1g000067	Gst1g000053	Gcy15g040112	Gsy1g000051	Gto4g010057
Gfa1g000068	Gst1g000054	Gcy18g049300	Gsy1g000052	Gto1g000057
Gfa1g000069	Gst1g000055	Gcy18g049299	Gsy1g000053	Gto4g010063
Gfa1g000070	Gst1g000057	Gcy15g040106	Gsy1g000055	Gto1g000059
Gfa1g000071	Gst1g000058	Gcy18g049296	Gsy1g000056	Gto4g010061
Gfa1g000072	.	Gcy18g049295	Gsy1g000057	.
Gfa1g000073	.	.	.	.
Gfa1g000074	Gst1g000059	Gcy15g040101	Gsy8g020026	Gto8g020563
Gfa1g000075	Gst1g000062	Gcy18g049290	Gsy1g000059	Gto1g000066
Gfa1g000076	Gst1g000063	.	Gsy1g000060	Gto1g000068
Gfa1g000077	Gst1g000064	Gcy18g049288	Gsy1g000061	Gto1g000067
Gfa1g000078	Gst1g000067	Gcy18g049287	Gsy1g000064	Gto1g000073
Gfa1g000079	.	.	.	.
Gfa1g000080	Gst1g000068	Gcy15g040129	Gsy1g000065	Gto1g000074
Gfa1g000081	.	.	.	.
Gfa1g000082	Gst1g000069	Gcy18g049285	Gsy1g000066	Gto1g000077
Gfa1g000083	Gst1g000070	Gcy18g049284	Gsy1g000067	Gto1g000078
Gfa1g000084	Gst1g000071	Gcy18g049283	Gsy1g000068	Gto1g000079
Gfa1g000085	Gst1g000077	Gcy18g049281	Gsy1g000069	Gto1g000081
Gfa1g000086	Gst1g000078	Gcy18g049280	Gsy1g000070	Gto4g010082
Gfa1g000087	Gst1g000079	Gcy18g049278	Gsy1g000071	Gto1g000082
Gfa1g000088	.	.	Gsy1g000073	Gto1g000084
Gfa1g000089	Gst1g000080	Gcy18g049276	Gsy1g000074	Gto1g000085
Gfa1g000090	Gst1g000081	Gcy18g049275	Gsy1g000075	Gto1g000086
Gfa1g000091	Gst1g000082	Gcy18g049274	Gsy1g000076	Gto1g000087
Gfa1g000092	Gst1g000083	Gcy18g049273	Gsy1g000077	Gto1g000088
Gfa1g000093	Gst1g000084	Gcy18g049272	Gsy1g000078	Gto1g000089
Gfa1g000094	Gst1g000085	Gcy18g049271	Gsy1g000079	Gto1g000090
Gfa1g000095	Gst1g000086	Gcy18g049270	Gsy1g000080	Gto1g000091
Gfa1g000096	Gst1g000088	Gcy18g049269	Gsy1g000081	Gto1g000092
Gfa1g000097	Gst19g050317	Gcy18g049265	Gsy19g049975	Gto4g010095
Gfa1g000098	Gst1g000089	Gcy18g049264	Gsy1g000082	Gto1g000094
Gfa1g000099	Gst1g000091	Gcy18g049263	Gsy1g000083	Gto1g000095
Gfa1g000100	.	.	.	.
Gfa1g000101	Gst1g000094	Gcy18g049262	Gsy1g000085	Gto1g000096
Gfa1g000102	Gst1g000095	Gcy18g049259	Gsy1g000086	Gto1g000097
Gfa1g000103	.	.	.	.
Gfa1g000104	Gst1g000097	Gcy18g049257	Gsy1g000087	Gto1g000098
Gfa1g000105	Gst1g000098	Gcy18g049256	Gsy1g000088	Gto1g000100
Gfa1g000106	Gst1g000099	Gcy18g049255	Gsy1g000089	Gto1g000102
Gfa1g000107	Gst1g000100	Gcy18g049254	Gsy1g000090	Gto1g000103
Gfa1g000108	.	.	.	.
Gfa1g000109	Gst1g000101	Gcy18g049253	Gsy1g000091	Gto1g000104
Gfa1g000110	Gst1g000102	Gcy18g049251	Gsy1g000092	Gto1g000106
Gfa1g000111	Gst1g000103	Gcy18g049250	Gsy1g000093	Gto1g000107
Gfa1g000112	Gst1g000104	Gcy18g049249	Gsy1g000094	Gto1g000108
Gfa1g000113	Gst1g000105	Gcy18g049248	Gsy1g000095	Gto1g000109
Gfa1g000114	Gst1g000107	Gcy18g049246	Gsy1g000097	Gto1g000111
Gfa1g000115	Gst1g000106	Gcy18g049247	Gsy1g000096	Gto1g000110
Gfa1g000116	Gst1g000109	Gcy18g049243	Gsy1g000099	Gto1g000113
Gfa1g000117	.	.	.	.
Gfa1g000118	Gst1g000110	Gcy18g049242	Gsy1g000101	Gto1g000114
Gfa1g000119	Gst9g024373	Gcy9g021959	Gsy9g024450	.
Gfa1g000120	Gst1g000111	Gcy18g049240	Gsy1g000102	Gto1g000115
Gfa1g000121	Gst1g000112	Gcy18g049239	Gsy1g000103	Gto1g000116
Gfa1g000122	.	.	.	.
Gfa1g000123	Gst1g000114	.	Gsy1g000104	Gto1g000117
Gfa1g000124	Gst1g000117	Gcy18g049237	Gsy1g000107	Gto1g000119
Gfa1g000125	Gst1g000116	Gcy18g049238	Gsy1g000106	Gto1g000118
Gfa1g000126	Gst1g000123	Gcy18g049236	Gsy1g000123	.
Gfa1g000127	.	.	.	.
Gfa1g000128	.	Gcy18g049234	Gsy1g000122	.
Gfa1g000129	.	.	.	.
Gfa1g000130	.	Gcy18g049231	Gsy1g000124	.
Gfa1g000131	.	Gcy18g049224	Gsy1g000131	.
Gfa1g000132	Gst1g000119	Gcy18g049228	Gsy1g000144	Gto1g000120
Gfa1g000133	.	Gcy18g049207	Gsy1g000146	.
Gfa1g000134	Gst1g000120	Gcy18g049227	Gsy1g000127	Gto1g000121
Gfa1g000135	.	.	.	.
Gfa1g000136	.	.	.	.
Gfa1g000137	.	Gcy18g049218	Gsy1g000119	.
Gfa1g000138	.	.	.	.
Gfa1g000139	.	.	Gsy1g000129	.
Gfa1g000140	Gst1g000125	Gcy18g049220	Gsy1g000136	Gto1g000126
Gfa1g000141	Gst1g000124	Gcy18g049223	Gsy1g000135	Gto1g000124
Gfa1g000142	.	.	Gsy1g000134	.
Gfa1g000143	.	.	.	.
Gfa1g000144	Gst1g000121	Gcy18g049226	Gsy1g000128	Gto1g000122
Gfa1g000145	Gst1g000130	Gcy18g049202	Gsy1g000138	Gto1g000127
Gfa1g000146	Gst1g000118	Gcy18g049230	Gsy1g000121	Gto15g041220
Gfa1g000147	Gst1g000128	Gcy18g049205	Gsy1g000126	Gto1g000133
Gfa1g000148	.	.	.	.
Gfa1g000148	.	.	.	.
Gfa1g000149	Gst1g000133	Gcy18g049214	.	.
Gfa1g000150	Gst1g000129	.	Gsy1g000147	Gto1g000131
Gfa1g000151	.	.	.	.
Gfa1g000152	Gst1g000131	Gcy9g021953	Gsy1g000151	Gto1g000136
Gfa1g000153	Gst1g000136	Gcy18g049204	Gsy1g000157	Gto1g000132
Gfa1g000154	.	Gcy18g049200	Gsy9g024416	Gto15g040627
Gfa1g000155	.	.	Gsy1g000148	.
Gfa1g000156	.	.	.	.
Gfa1g000157	.	Gcy18g049209	Gsy1g000154	.
Gfa1g000158	.	.	.	.
Gfa1g000159	.	.	.	.
Gfa1g000160	Gst1g000134	Gcy18g049212	Gsy1g000156	Gto1g000134
Gfa1g000161	Gst1g000137	Gcy18g049201	Gsy1g000158	Gto1g000139
Gfa1g000162	Gst1g000138	Gcy9g021942	Gsy1g000160	Gto1g000140
Gfa1g000163	Gst1g000139	Gcy18g049199	Gsy1g000161	Gto1g000141
Gfa1g000164	Gst1g000140	Gcy18g049198	Gsy1g000162	Gto1g000142
Gfa1g000165	Gst1g000141	Gcy18g049197	Gsy1g000163	Gto1g000143
Gfa1g000166	Gst1g000142	Gcy18g049196	Gsy1g000164	Gto1g000144
Gfa1g000167	Gst1g000143	Gcy18g049195	Gsy1g000166	Gto1g000145
Gfa1g000168	Gst1g000144	Gcy18g049194	Gsy1g000167	Gto1g000146
Gfa1g000169	Gst1g000145	Gcy18g049193	Gsy1g000168	Gto1g000147
Gfa1g000170	Gst1g000146	Gcy18g049192	Gsy1g000169	Gto1g000152
Gfa1g000171	.	.	.	.
Gfa1g000172	Gst1g000147	Gcy18g049190	Gsy1g000170	Gto1g000153
Gfa1g000173	Gst1g000149	Gcy18g049189	Gsy1g000171	Gto1g000154
Gfa1g000174	.	.	Gsy1g000172	.
Gfa1g000175	Gst9g024344	Gcy18g049186	Gsy1g000177	Gto1g000158
Gfa1g000176	Gst1g000153	Gcy18g049185	Gsy1g000179	Gto1g000159
Gfa1g000177	Gst1g000154	Gcy18g049183	Gsy1g000180	Gto1g000160
Gfa1g000178	Gst1g000155	Gcy18g049182	Gsy1g000181	Gto1g000161
Gfa1g000179	Gst1g000156	Gcy18g049181	Gsy1g000182	Gto1g000162
Gfa1g000180	Gst9g024340	Gcy16g043693	Gsy16g042853	Gto16g044487
Gfa1g000181	.	.	.	.
Gfa1g000182	.	.	.	.
Gfa1g000183	.	.	.	.
Gfa1g000184	Gst1g000157	Gcy18g049180	Gsy1g000183	Gto1g000163
Gfa1g000185	Gst1g000159	Gcy18g049179	Gsy1g000185	Gto1g000165
Gfa1g000186	Gst1g000161	Gcy18g049178	Gsy1g000187	Gto1g000166
Gfa1g000187	Gst1g000163	Gcy18g049177	Gsy1g000188	Gto1g000167
Gfa1g000188	Gst1g000164	Gcy18g049176	Gsy1g000189	Gto1g000168
Gfa1g000189	Gst1g000166	Gcy18g049175	.	.
Gfa1g000190	Gst1g000168	Gcy18g049174	Gsy1g000192	Gto1g000170
Gfa1g000191	Gst1g000169	Gcy18g049173	Gsy1g000193	Gto1g000171
Gfa1g000192	Gst1g000170	Gcy18g049172	Gsy1g000194	Gto1g000172
Gfa1g000193	Gst1g000171	Gcy18g049171	Gsy1g000195	Gto1g000173
Gfa1g000194	Gst1g000174	Gcy18g049170	Gsy1g000197	Gto1g000176
Gfa1g000195	Gst1g000175	Gcy18g049169	Gsy1g000198	Gto1g000177
Gfa1g000196	Gst1g000176	.	Gsy1g000199	Gto1g000178
Gfa1g000197	Gst1g000178	Gcy18g049167	Gsy1g000201	Gto1g000180
Gfa1g000198	Gst1g000179	Gcy9g021899	Gsy9g024363	Gto1g000181
Gfa1g000199	Gst1g000180	.	.	Gto1g000182
Gfa1g000200	Gst8g020506	Gcy8g018223	.	Gto8g020979
Gfa1g000201	Gst1g000183	.	Gsy1g000203	Gto1g000183
Gfa1g000202	Gst1g000184	Gcy18g049165	Gsy1g000204	Gto1g000184
Gfa1g000203	Gst1g000186	Gcy9g021894	Gsy9g024357	Gto15g040673
Gfa1g000204	Gst1g000187	Gcy18g049163	Gsy1g000205	Gto1g000187
Gfa1g000205	Gst1g000188	.	Gsy1g000206	.
Gfa1g000206	Gst1g000189	Gcy9g021890	Gsy9g024354	Gto1g000189
Gfa1g000207	Gst1g000190	Gcy18g049162	Gsy1g000207	Gto1g000190
Gfa1g000208	Gst1g000191	.	Gsy1g000208	Gto1g000191
Gfa1g000209	Gst1g000192	Gcy18g049160	Gsy1g000209	Gto1g000192
Gfa1g000210	.	Gcy9g021883	.	.
Gfa1g000211	Gst1g000193	Gcy18g049159	Gsy1g000210	Gto1g000194
Gfa1g000212	Gst1g000194	Gcy18g049158	Gsy1g000211	Gto1g000195
Gfa1g000213	Gst1g000195	Gcy18g049157	Gsy1g000212	Gto1g000196
Gfa1g000214	Gst1g000196	Gcy18g049156	Gsy1g000213	Gto1g000197
Gfa1g000215	Gst1g000197	Gcy18g049155	Gsy1g000214	Gto1g000198
Gfa1g000216	Gst1g000200	Gcy18g049154	Gsy1g000215	Gto1g000200
Gfa1g000217	Gst1g000201	Gcy18g049153	Gsy1g000216	Gto1g000201
Gfa1g000218	Gst1g000203	Gcy18g049151	Gsy1g000218	Gto1g000203
Gfa1g000219	Gst1g000204	Gcy18g049150	Gsy1g000219	Gto1g000205
Gfa1g000220	Gst1g000206	Gcy18g049149	Gsy1g000220	Gto1g000206
Gfa1g000221	Gst1g000207	Gcy18g049148	Gsy1g000221	Gto1g000207
Gfa1g000222	Gst1g000208	Gcy18g049147	Gsy1g000222	Gto1g000209
Gfa1g000223	Gst1g000209	Gcy18g049146	.	Gto1g000210
Gfa1g000224	.	.	.	.
Gfa1g000225	Gst1g000211	Gcy18g049144	.	Gto1g000212
Gfa1g000226	Gst1g000212	Gcy9g021861	Gsy9g024334	Gto15g040703
Gfa1g000227	Gst1g000213	Gcy18g049143	Gsy1g000224	Gto1g000213
Gfa1g000228	.	.	.	.
Gfa1g000229	Gst1g000214	Gcy9g021857	Gsy1g000225	Gto1g000214
Gfa1g000230	Gst1g000215	Gcy9g021855	Gsy9g024331	Gto15g040706
Gfa1g000231	Gst1g000216	Gcy18g049142	Gsy1g000227	Gto1g000217
Gfa1g000232	Gst1g000217	Gcy18g049139	Gsy1g000228	Gto1g000218
Gfa1g000233	Gst1g000220	Gcy16g043627	Gsy9g024324	Gto1g000221
Gfa1g000234	Gst1g000221	Gcy18g049138	Gsy1g000232	Gto1g000222
Gfa1g000235	Gst1g000222	Gcy18g049136	Gsy1g000233	Gto1g000223
Gfa1g000236	Gst9g024273	.	Gsy9g024319	.
Gfa1g000237	Gst1g000224	Gcy18g049134	Gsy1g000235	Gto1g000226
Gfa1g000238	.	.	Gsy1g000236	.
Gfa1g000239	Gst1g000225	Gcy9g021840	.	Gto1g000227
Gfa1g000240	Gst1g000226	Gcy18g049131	Gsy1g000237	Gto1g000228
Gfa1g000241	Gst1g000227	Gcy18g049128	Gsy1g000238	Gto1g000230
Gfa1g000242	Gst1g000229	Gcy18g049129	Gsy1g000241	Gto1g000232
Gfa1g000243	.	.	Gsy1g000242	.
Gfa1g000244	Gst1g000231	Gcy18g049126	Gsy1g000244	Gto1g000235
Gfa1g000245	.	.	.	.
Gfa1g000246	Gst1g000232	Gcy18g049125	Gsy1g000245	Gto1g000237
Gfa1g000247	Gst1g000233	Gcy18g049124	Gsy1g000246	Gto1g000239
Gfa1g000248	Gst1g000234	Gcy18g049123	Gsy1g000248	Gto1g000240
Gfa1g000249	Gst1g000235	Gcy18g049121	Gsy1g000250	Gto1g000241
Gfa1g000250	Gst9g024259	Gcy18g049120	Gsy1g000251	Gto1g000243
Gfa1g000251	Gst1g000236	Gcy18g049119	Gsy1g000252	Gto1g000244
Gfa1g000252	Gst1g000237	Gcy18g049117	Gsy1g000253	Gto1g000247
Gfa1g000253	Gst1g000238	Gcy18g049116	Gsy1g000254	Gto1g000249
Gfa1g000254	.	Gcy18g049115	Gsy1g000256	Gto1g000250
Gfa1g000255	Gst1g000241	Gcy18g049113	Gsy1g000259	Gto1g000253
Gfa1g000256	Gst1g000242	Gcy18g049109	Gsy1g000260	Gto1g000254
Gfa1g000257	Gst1g000245	Gcy18g049108	Gsy1g000262	Gto1g000257
Gfa1g000258	Gst1g000246	Gcy18g049106	Gsy1g000263	Gto1g000258
Gfa1g000259	.	.	.	.
Gfa1g000260	Gst1g000251	Gcy18g049103	Gsy1g000267	Gto1g000265
Gfa1g000261	Gst1g000252	Gcy18g049102	.	Gto1g000273
Gfa1g000262	Gst1g000253	Gcy18g049101	Gsy1g000268	Gto1g000274
Gfa1g000263	Gst1g000254	Gcy18g049100	Gsy1g000269	Gto1g000275
Gfa1g000264	.	.	.	.
Gfa1g000265	Gst1g000256	Gcy18g049098	Gsy1g000271	Gto9g024957
Gfa1g000266	.	.	.	.
Gfa1g000267	Gst1g000257	.	.	.
Gfa1g000268	Gst1g000258	Gcy18g049093	Gsy1g000272	Gto1g000279
Gfa1g000269	Gst1g000261	Gcy18g049092	Gsy1g000274	Gto1g000280
Gfa1g000270	Gst1g000262	.	.	.
Gfa1g000271	Gst1g000263	Gcy18g049089	Gsy1g000276	Gto1g000281
Gfa1g000272	Gst1g000264	Gcy18g049088	Gsy1g000278	Gto1g000282
Gfa1g000273	.	.	.	.
Gfa1g000274	.	.	.	.
Gfa1g000275	.	.	.	.
Gfa1g000276	Gst1g000265	Gcy18g049087	Gsy1g000280	Gto1g000283
Gfa1g000277	Gst16g042731	Gcy20g054509	Gsy5g010674	Gto13g034279
Gfa1g000278	Gst1g000266	Gcy18g049085	Gsy1g000281	Gto1g000284
Gfa1g000279	Gst1g000267	Gcy14g037336	Gsy1g000282	Gto1g000286
Gfa1g000280	Gst1g000269	.	.	.
Gfa1g000281	Gst1g000270	Gcy18g049084	Gsy1g000283	Gto1g000290
Gfa1g000282	.	Gcy18g049082	.	.
Gfa1g000283	Gst1g000271	Gcy18g049080	Gsy1g000284	Gto1g000291
Gfa1g000284	.	.	.	.
Gfa1g000285	Gst1g000272	Gcy18g049079	Gsy1g000285	Gto1g000292
Gfa1g000286	Gst1g000273	Gcy18g049078	Gsy1g000286	Gto1g000293
Gfa1g000287	.	.	.	.
Gfa1g000288	Gst1g000275	Gcy18g049076	Gsy1g000287	Gto1g000295
Gfa1g000289	Gst1g000277	Gcy18g049074	Gsy1g000288	Gto1g000296
Gfa1g000290	.	Gcy18g049073	.	.
Gfa1g000291	.	.	.	.
Gfa1g000292	.	Gcy14g037324	Gsy1g000289	Gto1g000297
Gfa1g000293	Gst1g000279	Gcy18g049072	Gsy1g000290	Gto1g000298
Gfa1g000294	Gst1g000280	Gcy18g049071	Gsy8g021882	Gto1g000299
Gfa1g000295	.	.	.	.
Gfa1g000296	Gst1g000281	Gcy18g049070	Gsy1g000291	Gto1g000300
Gfa1g000297	Gst1g000283	Gcy18g049069	Gsy1g000292	Gto1g000301
Gfa1g000298	Gst1g000284	Gcy18g049067	Gsy1g000293	Gto1g000303
Gfa1g000299	Gst1g000288	Gcy18g049066	Gsy1g000296	Gto1g000304
Gfa1g000300	Gst8g021819	Gcy18g049064	Gsy1g000297	Gto1g000305
Gfa1g000301	Gst1g000291	Gcy18g049062	Gsy1g000299	Gto1g000306
Gfa1g000302	Gst1g000292	Gcy18g049061	Gsy1g000300	Gto1g000307
Gfa1g000303	.	.	.	.
Gfa1g000304	Gst1g000294	Gcy14g037312	Gsy1g000301	Gto1g000308
Gfa1g000305	Gst1g000293	Gcy18g049060	Gsy1g000304	Gto1g000309
Gfa1g000306	.	.	.	.
Gfa1g000307	Gst1g000296	Gcy18g049058	Gsy1g000305	Gto1g000311
Gfa1g000308	Gst1g000299	Gcy18g049056	.	Gto1g000313
Gfa1g000309	Gst1g000300	Gcy18g049055	Gsy1g000309	Gto1g000316
Gfa1g000310	Gst1g000301	Gcy18g049054	Gsy1g000310	Gto1g000317
Gfa1g000311	Gst1g000302	Gcy18g049053	Gsy1g000311	Gto1g000318
Gfa1g000312	Gst1g000310	Gcy14g037300	.	.
Gfa1g000313	Gst1g000311	Gcy3g005402	Gsy1g000317	Gto1g000342
Gfa1g000314	Gst1g000312	Gcy18g049052	.	Gto1g000343
Gfa1g000315	Gst1g000314	Gcy18g049050	Gsy1g000318	Gto1g000345
Gfa1g000316	.	.	.	.
Gfa1g000317	Gst1g000315	Gcy18g049048	Gsy1g000319	Gto1g000346
Gfa1g000318	Gst1g000316	Gcy18g049044	Gsy1g000320	Gto1g000347
Gfa1g000319	Gst1g000318	Gcy14g037291	Gsy1g000321	Gto1g000349
Gfa1g000320	Gst1g000317	Gcy18g049043	Gsy1g000322	Gto1g000351
Gfa1g000321	.	.	.	.
Gfa1g000322	Gst1g000319	.	.	Gto1g000352
Gfa1g000323	Gst1g000320	Gcy18g049042	Gsy1g000323	Gto1g000353
Gfa1g000324	Gst8g021793	Gcy13g031630	Gsy8g021775	Gto16g045145
Gfa1g000325	Gst1g000321	Gcy18g049041	Gsy1g000324	Gto1g000354
Gfa1g000326	Gst1g000322	Gcy18g049039	Gsy1g000325	Gto1g000355
Gfa1g000327	Gst1g000323	Gcy14g037279	Gsy8g021858	Gto10g025642
Gfa1g000328	Gst1g000324	Gcy18g049038	Gsy1g000327	Gto1g000357
Gfa1g000329	.	Gcy18g049037	Gsy1g000328	Gto1g000358
Gfa1g000330	Gst1g000325	Gcy18g049036	Gsy1g000331	Gto1g000360
Gfa1g000331	Gst8g021780	Gcy14g037274	Gsy8g021845	Gto10g025647
Gfa1g000332	Gst1g000328	Gcy18g049034	Gsy1g000334	Gto1g000365
Gfa1g000333	.	.	.	.
Gfa1g000334	Gst1g000330	Gcy18g049033	Gsy1g000335	Gto1g000366
Gfa1g000335	Gst1g000331	Gcy18g049032	Gsy1g000336	Gto5g011215
Gfa1g000336	Gst1g000332	Gcy18g049030	Gsy8g021839	Gto10g028034
Gfa1g000337	Gst1g000333	Gcy18g049029	Gsy1g000338	Gto1g000367
Gfa1g000338	Gst1g000334	Gcy18g049028	Gsy1g000339	Gto1g000368
Gfa1g000339	Gst1g000335	Gcy18g049026	Gsy1g000340	Gto1g000372
Gfa1g000340	Gst1g000337	Gcy18g049022	Gsy1g000341	Gto1g000376
Gfa1g000341	Gst1g000339	Gcy18g049021	Gsy1g000345	Gto1g000378
Gfa1g000342	.	.	.	.
Gfa1g000343	Gst1g000340	Gcy18g049020	Gsy1g000346	Gto1g000379
Gfa1g000344	.	.	.	.
Gfa1g000345	Gst1g000341	.	.	.
Gfa1g000346	.	.	.	.
Gfa1g000347	Gst1g000338	Gcy18g049000	Gsy1g000343	Gto1g000392
Gfa1g000348	.	Gcy18g048997	Gsy1g000377	Gto12g032216
Gfa1g000349	Gst1g000347	Gcy18g048987	Gsy1g000378	Gto1g000388
Gfa1g000350	Gst1g000348	Gcy18g049008	Gsy1g000382	Gto6g014618
Gfa1g000351	Gst1g000362	Gcy18g048991	Gsy1g000356	Gto1g000425
Gfa1g000352	Gst1g000364	Gcy18g048990	Gsy1g000353	Gto1g000424
Gfa1g000353	Gst1g000387	Gcy18g048989	Gsy1g000401	Gto1g000406
Gfa1g000354	Gst1g000389	Gcy18g048981	.	Gto1g000409
Gfa1g000355	Gst1g000388	Gcy18g048988	Gsy1g000402	Gto1g000407
Gfa1g000356	Gst1g000390	Gcy18g048978	Gsy1g000403	Gto1g000410
Gfa1g000357	Gst8g021749	.	Gsy8g021815	.
Gfa1g000358	Gst8g021752	Gcy18g048980	Gsy1g000408	.
Gfa1g000359	.	.	Gsy1g000406	Gto1g000412
Gfa1g000360	Gst1g000393	Gcy14g037238	Gsy1g000405	Gto1g000411
Gfa1g000361	Gst6g012857	Gcy6g012599	Gsy6g013051	.
Gfa1g000362	Gst1g000394	Gcy18g048977	Gsy1g000412	Gto1g000414
Gfa1g000363	Gst1g000395	Gcy18g048976	Gsy1g000413	Gto1g000416
Gfa1g000364	Gst8g021743	Gcy14g037232	Gsy8g021809	Gto10g025673
Gfa1g000365	Gst1g000398	Gcy18g048975	Gsy1g000414	Gto1g000418
Gfa1g000366	Gst1g000399	Gcy18g048974	Gsy1g000415	Gto1g000419
Gfa1g000367	Gst1g000405	Gcy18g048968	Gsy1g000417	Gto1g000420
Gfa1g000368	Gst1g000406	Gcy18g048967	Gsy1g000418	Gto1g000421
Gfa1g000369	.	Gcy18g048966	.	Gto1g000422
Gfa1g000370	Gst1g000407	Gcy18g048965	Gsy1g000421	Gto10g025675
Gfa1g000371	Gst1g000408	Gcy18g048964	Gsy1g000422	Gto1g000428
Gfa1g000372	.	.	.	.
Gfa1g000373	Gst1g000409	Gcy18g048963	Gsy1g000423	Gto1g000430
Gfa1g000374	.	Gcy14g037216	Gsy1g000424	Gto1g000432
Gfa1g000375	Gst1g000411	Gcy18g048962	Gsy1g000425	Gto1g000433
Gfa1g000376	Gst1g000412	Gcy20g055290	Gsy20g053981	Gto20g055575
Gfa1g000377	.	.	.	.
Gfa1g000378	Gst1g000413	.	.	Gto1g000434
Gfa1g000379	Gst1g000414	Gcy18g048960	Gsy1g000426	Gto1g000435
Gfa1g000380	.	.	.	.
Gfa1g000381	.	.	.	.
Gfa1g000382	.	.	.	.
Gfa1g000383	.	.	.	.
Gfa1g000384	.	.	Gsy6g014811	.
Gfa1g000385	Gst1g000415	Gcy14g037203	Gsy8g021787	Gto1g000440
Gfa1g000386	.	.	.	.
Gfa1g000387	Gst19g050855	Gcy16g043472	Gsy4g008810	Gto18g051280
Gfa1g000388	.	.	.	Gto1g000438
Gfa1g000389	Gst1g000416	Gcy14g037205	Gsy8g021789	Gto1g000439
Gfa1g000390	.	.	.	.
Gfa1g000391	Gst1g000417	Gcy8g018616	Gsy1g000427	Gto1g000442
Gfa1g000392	Gst1g000418	Gcy18g048948	Gsy1g000428	Gto1g000443
Gfa1g000393	.	Gcy14g037200	.	Gto1g000444
Gfa1g000394	Gst1g000419	Gcy18g048947	Gsy1g000429	Gto1g000445
Gfa1g000395	Gst1g000420	Gcy18g048946	Gsy1g000430	Gto1g000446
Gfa1g000396	Gst1g000421	Gcy18g048945	Gsy1g000432	Gto1g000447
Gfa1g000397	Gst1g000422	Gcy14g037195	Gsy1g000433	Gto1g000448
Gfa1g000398	Gst1g000424	Gcy18g048943	Gsy1g000434	Gto1g000449
Gfa1g000399	Gst1g000425	Gcy18g048941	Gsy1g000435	Gto1g000450
Gfa1g000400	Gst1g000426	Gcy18g048940	Gsy1g000436	Gto1g000452
Gfa1g000401	Gst1g000427	Gcy18g048939	Gsy1g000437	Gto1g000453
Gfa1g000402	Gst1g000428	Gcy18g048937	Gsy8g021766	Gto1g000454
Gfa1g000403	Gst1g000429	Gcy18g048936	Gsy1g000439	Gto1g000455
Gfa1g000404	.	.	.	.
Gfa1g000405	.	.	.	.
Gfa1g000405	.	.	.	.
Gfa1g000406	Gst7g016802	Gcy13g032210	Gsy8g018902	Gto18g049647
Gfa1g000407	.	.	.	.
Gfa1g000408	Gst1g000430	Gcy18g048934	Gsy1g000440	Gto1g000456
Gfa1g000409	Gst1g000432	Gcy18g048933	Gsy1g000441	Gto1g000457
Gfa1g000410	Gst1g000433	Gcy18g048932	Gsy1g000442	Gto1g000458
Gfa1g000411	Gst1g000434	Gcy18g048930	Gsy1g000443	Gto1g000459
Gfa1g000412	.	.	.	.
Gfa1g000413	Gst1g000435	Gcy18g048929	Gsy1g000444	Gto1g000460
Gfa1g000414	Gst1g000436	Gcy18g048928	Gsy1g000445	Gto1g000462
Gfa1g000415	Gst1g000437	Gcy18g048926	Gsy1g000446	Gto1g000463
Gfa1g000416	Gst1g000439	Gcy18g048925	Gsy1g000447	Gto1g000464
Gfa1g000417	Gst1g000442	Gcy18g048924	Gsy1g000448	Gto1g000465
Gfa1g000418	Gst1g000443	.	Gsy1g000449	Gto10g025728
Gfa1g000419	Gst1g000444	Gcy18g048923	Gsy1g000450	Gto1g000466
Gfa1g000420	Gst1g000446	Gcy18g048922	Gsy1g000452	Gto1g000467
Gfa1g000421	Gst1g000448	Gcy18g048343	Gsy18g047440	Gto10g026934
Gfa1g000422	.	.	.	.
Gfa1g000423	Gst1g000451	Gcy18g048919	Gsy1g000454	Gto1g000470
Gfa1g000424	Gst1g000452	Gcy18g048917	Gsy1g000456	Gto1g000473
Gfa1g000425	Gst8g020799	Gcy18g048916	Gsy1g000457	Gto1g000475
Gfa1g000426	.	.	Gsy1g000458	Gto1g000476
Gfa1g000427	.	.	.	.
Gfa1g000428	Gst1g000455	Gcy18g048913	Gsy1g000461	Gto1g000479
Gfa1g000429	Gst1g000454	Gcy18g048914	.	.
Gfa1g000430	.	.	.	.
Gfa1g000431	Gst1g000456	Gcy18g048911	Gsy1g000464	Gto1g000482
Gfa1g000432	Gst1g000457	Gcy18g048910	Gsy1g000465	Gto1g000483
Gfa1g000433	Gst1g000458	Gcy14g037150	Gsy1g000466	Gto1g000484
Gfa1g000434	.	Gcy18g048909	.	Gto1g000485
Gfa1g000435	.	.	.	.
Gfa1g000436	Gst8g021676	Gcy14g037146	Gsy3g005428	Gto1g001304
Gfa1g000437	.	.	.	.
Gfa1g000438	Gst1g000475	Gcy18g048885	Gsy1g000485	Gto1g000512
Gfa1g000439	Gst1g000474	Gcy18g048886	Gsy1g000484	Gto1g000511
Gfa1g000440	Gst8g021657	Gcy18g048887	Gsy8g021640	Gto10g025773
Gfa1g000441	.	Gcy18g048889	.	.
Gfa1g000442	.	.	.	.
Gfa1g000443	.	.	.	.
Gfa1g000444	.	.	.	.
Gfa1g000445	.	.	.	.
Gfa1g000446	.	.	.	.
Gfa1g000447	.	.	.	.
Gfa1g000448	.	.	.	.
Gfa1g000449	Gst1g000463	Gcy18g048904	Gsy1g000471	Gto1g000495
Gfa1g000450	.	.	Gsy1g000470	.
Gfa1g000451	Gst11g030409	.	.	.
Gfa1g000452	Gst5g010634	Gcy5g010542	.	.
Gfa1g000453	Gst1g000461	Gcy18g048905	Gsy1g000468	Gto1g000490
Gfa1g000454	Gst1g000460	Gcy18g048906	Gsy1g000467	Gto1g000489
Gfa1g000455	.	Gcy18g048907	.	.
Gfa1g000456	.	Gcy7g016691	.	.
Gfa1g000457	.	.	Gsy19g050738	.
Gfa1g000458	Gst1g000465	Gcy18g048899	Gsy1g000473	Gto1g000502
Gfa1g000459	.	.	.	.
Gfa1g000460	Gst1g000467	Gcy18g048897	Gsy1g000474	Gto1g000505
Gfa1g000461	.	Gcy18g048896	Gsy1g000475	.
Gfa1g000462	Gst1g000468	Gcy18g048894	Gsy8g021649	Gto10g025761
Gfa1g000463	Gst1g000469	Gcy18g048893	Gsy11g030651	Gto1g000507
Gfa1g000464	Gst1g000470	.	Gsy1g000480	Gto1g000508
Gfa1g000465	Gst1g000472	Gcy18g048892	Gsy1g000482	Gto1g000509
Gfa1g000466	Gst1g000473	Gcy18g048890	Gsy1g000483	Gto1g000510
Gfa1g000467	Gst1g000476	Gcy18g048883	Gsy1g000486	Gto1g000513
Gfa1g000468	Gst1g000479	Gcy18g048882	Gsy1g000488	Gto1g000515
Gfa1g000469	.	.	.	.
Gfa1g000470	Gst1g000480	Gcy18g048880	Gsy1g000489	Gto1g000516
Gfa1g000471	.	.	.	.
Gfa1g000472	Gst1g000481	Gcy18g048879	Gsy1g000491	Gto1g000517
Gfa1g000473	Gst1g000483	Gcy18g048877	.	Gto1g000519
Gfa1g000474	Gst1g000484	Gcy18g048876	Gsy1g000492	Gto1g000520
Gfa1g000475	Gst1g000485	Gcy18g048874	Gsy1g000495	Gto1g000522
Gfa1g000476	Gst1g000486	Gcy14g037111	.	Gto1g000523
Gfa1g000477	.	.	.	.
Gfa1g000478	Gst1g000487	Gcy18g048873	Gsy1g000497	Gto1g000525
Gfa1g000479	Gst1g000490	Gcy18g048870	Gsy1g000498	Gto1g000538
Gfa1g000480	Gst1g000491	.	Gsy1g000499	Gto1g000540
Gfa1g000481	Gst1g000492	.	.	.
Gfa1g000482	Gst1g000493	Gcy18g048863	Gsy17g044872	Gto5g011138
Gfa1g000483	Gst1g000510	Gcy18g048860	Gsy1g000500	.
Gfa1g000484	.	.	Gsy1g000501	Gto1g000543
Gfa1g000485	Gst1g000513	Gcy14g037100	Gsy1g000502	Gto1g000544
Gfa1g000486	.	.	.	.
Gfa1g000487	.	.	.	.
Gfa1g000488	Gst1g000514	Gcy18g048859	Gsy1g000504	Gto1g000545
Gfa1g000489	Gst1g000515	Gcy18g048858	Gsy1g000505	Gto1g000546
Gfa1g000490	.	.	.	.
Gfa1g000491	Gst1g000516	Gcy18g048857	Gsy1g000506	Gto1g000547
Gfa1g000492	Gst18g047799	Gcy18g048273	Gsy1g000507	Gto1g000548
Gfa1g000493	Gst1g000518	Gcy18g048854	Gsy1g000508	Gto10g025692
Gfa1g000494	.	.	Gsy8g021612	.
Gfa1g000495	Gst1g000519	Gcy18g048853	Gsy1g000509	Gto1g000550
Gfa1g000496	.	.	.	.
Gfa1g000497	.	.	.	.
Gfa1g000498	.	.	.	.
Gfa1g000499	Gst1g000520	Gcy18g048852	Gsy1g000511	Gto1g000551
Gfa1g000500	Gst1g000521	Gcy18g048850	Gsy1g000512	Gto1g000552
Gfa1g000501	.	.	Gsy1g000513	Gto1g000554
Gfa1g000502	Gst1g000522	Gcy18g048849	Gsy8g021609	Gto1g000555
Gfa1g000503	.	Gcy18g048848	.	Gto1g000557
Gfa1g000504	Gst10g027508	Gcy20g055573	Gsy20g054457	Gto7g017414
Gfa1g000505	.	Gcy18g048835	Gsy1g000514	Gto1g000558
Gfa1g000506	.	Gcy18g048843	.	Gto1g000562
Gfa1g000507	Gst1g000525	Gcy18g048834	Gsy1g000517	Gto1g000567
Gfa1g000508	Gst1g000526	Gcy18g048833	Gsy1g000518	Gto1g000568
Gfa1g000509	Gst1g000527	Gcy18g048832	.	Gto1g000569
Gfa1g000510	.	.	.	.
Gfa1g000511	.	.	.	.
Gfa1g000512	.	.	.	.
Gfa1g000513	.	.	.	.
Gfa1g000514	.	.	.	.
Gfa1g000515	.	.	.	Gto6g016132
Gfa1g000516	Gst1g000528	Gcy18g048830	Gsy1g000520	Gto1g000573
Gfa1g000517	Gst1g001279	Gcy18g048829	.	Gto1g000575
Gfa1g000518	.	.	.	.
Gfa1g000519	.	Gcy14g037078	.	.
Gfa1g000520	.	.	.	.
Gfa1g000521	Gst1g000532	Gcy18g048827	Gsy1g000523	Gto1g000586
Gfa1g000522	Gst1g000533	Gcy18g048826	.	.
Gfa1g000523	Gst1g000534	Gcy18g048825	Gsy1g000531	Gto1g000589
Gfa1g000524	.	.	.	.
Gfa1g000525	Gst1g000535	Gcy6g014765	Gsy1g000532	Gto1g000591
Gfa1g000526	.	.	Gsy1g000535	.
Gfa1g000527	Gst1g000538	Gcy18g048824	Gsy1g000537	Gto1g000592
Gfa1g000528	Gst1g000541	Gcy18g048822	.	Gto1g000593
Gfa1g000529	.	.	.	.
Gfa1g000530	.	.	.	Gto1g000594
Gfa1g000531	.	.	.	.
Gfa1g000532	.	.	.	.
Gfa1g000533	Gst1g000543	Gcy18g048820	.	.
Gfa1g000534	Gst1g000545	Gcy18g048819	Gsy1g000540	Gto1g000595
Gfa1g000535	Gst1g000547	Gcy18g048818	Gsy1g000542	Gto1g000602
Gfa1g000536	.	.	.	.
Gfa1g000537	.	.	.	.
Gfa1g000538	Gst1g000548	Gcy18g048564	Gsy1g000543	Gto1g000604
Gfa1g000539	Gst1g000549	Gcy18g048565	Gsy1g000544	Gto1g000605
Gfa1g000540	.	.	.	.
Gfa1g000541	.	.	.	.
Gfa1g000542	.	.	.	.
Gfa1g000543	Gst1g000551	Gcy18g048568	Gsy1g000548	Gto1g000606
Gfa1g000544	.	Gcy5g011328	.	Gto13g035442
Gfa1g000545	Gst1g000553	Gcy18g048569	Gsy1g000550	Gto10g025833
Gfa1g000546	Gst1g000555	Gcy18g048570	Gsy1g000551	Gto1g000607
Gfa1g000547	.	.	.	.
Gfa1g000548	.	.	.	.
Gfa1g000549	.	.	.	.
Gfa1g000550	Gst1g000556	Gcy18g048571	Gsy1g000552	Gto1g000608
Gfa1g000551	Gst1g000557	Gcy18g048572	Gsy1g000554	Gto1g000609
Gfa1g000552	.	.	.	.
Gfa1g000553	Gst1g000558	Gcy18g048573	Gsy1g000557	Gto1g000611
Gfa1g000554	Gst1g000559	Gcy18g048574	Gsy6g014138	Gto6g014966
Gfa1g000555	Gst1g000561	Gcy18g048575	Gsy1g000558	Gto1g000612
Gfa1g000556	.	.	.	.
Gfa1g000557	.	.	.	.
Gfa1g000558	Gst8g021598	Gcy14g037052	Gsy8g021711	Gto10g025840
Gfa1g000559	Gst12g032459	Gcy12g030663	Gsy12g032502	.
Gfa1g000560	.	.	.	.
Gfa1g000561	.	.	.	.
Gfa1g000562	.	.	.	.
Gfa1g000563	Gst1g000563	Gcy18g048578	Gsy1g000559	Gto1g000617
Gfa1g000564	.	.	Gsy1g000561	.
Gfa1g000565	Gst1g000564	Gcy18g048582	Gsy1g000564	Gto1g000619
Gfa1g000566	.	.	.	.
Gfa1g000567	Gst1g000565	Gcy18g048583	Gsy1g000565	Gto1g000621
Gfa1g000568	Gst1g000567	Gcy18g048585	Gsy1g000567	Gto1g000622
Gfa1g000569	Gst1g000568	Gcy18g048587	Gsy1g000568	Gto1g000624
Gfa1g000570	Gst1g000569	Gcy18g048588	Gsy1g000569	Gto1g000626
Gfa1g000571	.	Gcy18g048590	Gsy1g000576	Gto1g000630
Gfa1g000572	Gst1g000572	Gcy18g048591	Gsy1g000575	Gto1g000632
Gfa1g000573	Gst1g000577	Gcy18g048592	Gsy1g000574	Gto1g000635
Gfa1g000574	.	.	.	.
Gfa1g000575	.	Gcy10g024642	.	.
Gfa1g000576	.	.	.	.
Gfa1g000577	.	.	.	Gto1g000600
Gfa1g000578	Gst1g000579	Gcy18g048594	Gsy1g000573	Gto1g000637
Gfa1g000579	Gst1g000581	Gcy18g048595	Gsy1g000583	Gto1g000638
Gfa1g000580	.	.	.	.
Gfa1g000581	.	.	.	.
Gfa1g000582	Gst1g000582	Gcy18g048596	Gsy1g000586	Gto1g000641
Gfa1g000583	Gst1g000583	Gcy18g048597	Gsy1g000587	Gto1g000642
Gfa1g000584	Gst1g000584	Gcy18g048598	Gsy1g000589	Gto1g000643
Gfa1g000585	Gst1g000585	Gcy18g048599	Gsy1g000590	Gto1g000644
Gfa1g000586	Gst1g000586	Gcy18g048600	Gsy1g000591	Gto1g000646
Gfa1g000587	Gst1g000587	Gcy18g048601	Gsy1g000592	Gto1g000647
Gfa1g000588	.	.	.	.
Gfa1g000589	.	.	.	.
Gfa1g000590	.	.	.	Gto18g051234
Gfa1g000591	.	Gcy9g020939	.	.
Gfa1g000592	.	.	.	.
Gfa1g000593	.	Gcy9g020965	Gsy9g023475	.
Gfa1g000594	Gst1g000590	Gcy18g048604	Gsy1g000595	Gto1g000651
Gfa1g000595	Gst1g000591	Gcy18g048606	Gsy1g000605	Gto1g000652
Gfa1g000596	Gst1g000592	Gcy18g048607	Gsy1g000596	Gto1g000653
Gfa1g000597	.	.	.	.
Gfa1g000598	Gst1g000594	Gcy18g048609	Gsy1g000599	.
Gfa1g000599	Gst1g000595	Gcy18g048610	.	Gto1g000654
Gfa1g000600	Gst1g000597	Gcy18g048613	Gsy1g000600	Gto1g000655
Gfa1g000601	Gst1g000598	Gcy18g048614	Gsy1g000601	Gto1g000656
Gfa1g000602	.	.	.	.
Gfa1g000603	.	.	.	.
Gfa1g000604	Gst1g001314	.	.	Gto1g001521
Gfa1g000605	.	.	.	.
Gfa1g000606	Gst3g005461	.	Gsy7g016454	Gto3g006380
Gfa1g000607	Gst1g000599	.	.	Gto1g000657
Gfa1g000608	Gst1g000600	Gcy18g048616	Gsy18g048779	Gto18g050799
Gfa1g000609	Gst1g000601	Gcy18g048617	Gsy1g000602	Gto1g000658
Gfa1g000610	.	Gcy18g048618	.	.
Gfa1g000611	Gst1g000752	Gcy15g041925	Gsy1g000881	Gto1g000898
Gfa1g000612	.	.	.	.
Gfa1g000613	.	.	.	.
Gfa1g000614	.	Gcy2g002939	.	.
Gfa1g000615	.	.	.	.
Gfa1g000616	.	.	.	.
Gfa1g000617	.	.	.	.
Gfa1g000618	.	.	.	.
Gfa1g000619	.	.	.	.
Gfa1g000620	.	.	.	.
Gfa1g000621	Gst8g021553	Gcy15g041921	Gsy8g021590	Gto10g025893
Gfa1g000622	Gst9g023021	.	Gsy9g023052	.
Gfa1g000623	.	Gcy7g015556	.	Gto9g024072
Gfa1g000624	Gst1g000604	Gcy18g048619	Gsy1g000604	Gto1g000665
Gfa1g000625	.	.	.	.
Gfa1g000626	.	Gcy18g048620	Gsy1g000606	Gto1g000668
Gfa1g000627	Gst1g000605	Gcy18g048625	Gsy1g000608	Gto1g000671
Gfa1g000628	Gst1g000606	Gcy18g048626	Gsy1g000609	Gto1g000672
Gfa1g000629	.	.	.	.
Gfa1g000630	.	.	.	.
Gfa1g000631	Gst1g000607	Gcy18g048631	Gsy1g000612	Gto1g000674
Gfa1g000632	.	.	.	.
Gfa1g000633	Gst1g000610	Gcy18g048633	Gsy8g021583	Gto1g000676
Gfa1g000634	Gst1g000611	Gcy18g048634	Gsy1g000614	Gto1g000677
Gfa1g000635	.	Gcy17g046098	.	.
Gfa1g000636	Gst1g000612	Gcy18g048636	Gsy1g000616	Gto1g000678
Gfa1g000637	Gst1g000614	Gcy19g050773	Gsy1g000617	Gto1g000679
Gfa1g000638	Gst1g000616	Gcy5g010667	Gsy1g000618	Gto1g000682
Gfa1g000639	.	.	.	.
Gfa1g000640	.	.	.	.
Gfa1g000641	Gst1g000617	Gcy18g048639	Gsy1g000619	Gto1g000684
Gfa1g000642	Gst1g000618	Gcy18g048640	Gsy1g000620	Gto1g000685
Gfa1g000643	Gst1g000619	Gcy18g048641	Gsy1g000621	Gto1g000686
Gfa1g000644	Gst1g000620	Gcy18g048642	Gsy1g000622	Gto1g000687
Gfa1g000645	.	Gcy18g048643	Gsy1g000624	Gto1g000688
Gfa1g000646	Gst1g000621	.	Gsy1g000625	Gto1g000689
Gfa1g000647	Gst1g000622	Gcy14g037000	Gsy8g021576	Gto10g025909
Gfa1g000648	.	.	Gsy1g000626	Gto1g000690
Gfa1g000649	Gst1g000623	.	.	.
Gfa1g000650	.	.	.	.
Gfa1g000651	.	.	.	.
Gfa1g000652	Gst1g000629	Gcy18g048645	Gsy1g000632	Gto1g000698
Gfa1g000653	Gst1g000630	Gcy14g036998	Gsy8g021572	Gto10g025912
Gfa1g000654	.	.	.	.
Gfa1g000655	.	.	.	Gto9g023916
Gfa1g000656	Gst1g000633	Gcy18g048649	Gsy1g000637	Gto1g000703
Gfa1g000657	Gst1g000634	Gcy18g048650	Gsy1g000640	Gto1g000706
Gfa1g000658	.	.	.	.
Gfa1g000659	.	.	.	.
Gfa1g000660	Gst1g000640	Gcy18g048653	.	.
Gfa1g000661	Gst1g000641	Gcy18g048654	Gsy1g000646	Gto1g000711
Gfa1g000662	Gst1g000642	Gcy18g048655	.	Gto10g025934
Gfa1g000663	.	.	Gsy3g007443	.
Gfa1g000664	Gst1g000644	Gcy18g048657	Gsy1g000648	Gto1g000714
Gfa1g000665	.	Gcy6g013657	.	.
Gfa1g000666	Gst1g000647	Gcy18g048660	Gsy1g000650	Gto1g000718
Gfa1g000667	Gst1g000648	Gcy18g048662	.	.
Gfa1g000668	Gst1g000652	Gcy8g019753	Gsy1g000651	.
Gfa1g000669	Gst1g000653	Gcy18g048664	Gsy1g000652	.
Gfa1g000670	.	Gcy18g048676	.	.
Gfa1g000671	Gst1g000658	Gcy18g048666	Gsy1g000655	Gto1g000724
Gfa1g000672	Gst1g000659	Gcy18g048667	Gsy1g000657	Gto1g000725
Gfa1g000673	Gst1g000660	Gcy18g048668	Gsy1g000658	Gto1g000727
Gfa1g000674	Gst1g000661	Gcy18g048671	Gsy1g000660	Gto1g000729
Gfa1g000675	Gst1g000662	Gcy18g048673	Gsy1g000661	Gto1g000730
Gfa1g000676	.	.	.	.
Gfa1g000677	Gst6g013817	Gcy6g013524	.	Gto6g014714
Gfa1g000678	Gst2g003717	Gcy2g003890	Gsy2g003647	Gto18g049743
Gfa1g000679	Gst1g000663	Gcy18g048683	Gsy1g000664	Gto1g000736
Gfa1g000680	Gst1g000665	Gcy18g048685	.	Gto1g000738
Gfa1g000681	.	.	.	.
Gfa1g000682	Gst1g000666	Gcy18g048695	Gsy1g000665	Gto1g000750
Gfa1g000683	Gst1g000667	Gcy18g048696	Gsy1g000666	Gto1g000751
Gfa1g000684	.	.	.	.
Gfa1g000685	Gst1g000668	Gcy18g048697	Gsy1g000668	Gto1g000753
Gfa1g000686	.	.	.	.
Gfa1g000687	Gst1g000669	.	.	.
Gfa1g000688	.	.	.	.
Gfa1g000689	Gst3g006877	Gcy3g006892	Gsy8g017907	.
Gfa1g000690	.	.	.	.
Gfa1g000691	Gst19g050304	Gcy15g040069	Gsy19g049967	Gto4g010106
Gfa1g000692	.	.	.	.
Gfa1g000693	.	.	.	.
Gfa1g000694	Gst1g000670	Gcy18g048699	Gsy1g000674	Gto1g000758
Gfa1g000695	.	.	.	.
Gfa1g000696	Gst1g000673	Gcy18g048707	Gsy1g000677	Gto1g000767
Gfa1g000697	.	.	.	.
Gfa1g000698	.	Gcy18g048706	.	.
Gfa1g000699	.	.	.	.
Gfa1g000700	.	.	.	.
Gfa1g000701	Gst1g000674	Gcy18g048705	Gsy1g000678	Gto10g025962
Gfa1g000702	.	.	.	.
Gfa1g000703	Gst1g000675	Gcy18g048708	Gsy1g000679	Gto1g000768
Gfa1g000704	Gst9g023541	Gcy2g004894	Gsy2g004687	Gto8g022336
Gfa1g000705	.	Gcy18g048711	.	.
Gfa1g000706	Gst5g011003	Gcy3g005339	Gsy13g033458	Gto16g044349
Gfa1g000707	.	Gcy3g005243	.	Gto9g023934
Gfa1g000708	.	.	.	.
Gfa1g000709	Gst1g000676	Gcy18g048785	Gsy1g000680	Gto1g000769
Gfa1g000710	Gst19g050247	Gcy12g031378	Gsy19g049205	Gto4g010812
Gfa1g000711	.	.	.	.
Gfa1g000712	.	.	.	.
Gfa1g000713	Gst20g054712	Gcy10g025262	Gsy10g027616	Gto6g015653
Gfa1g000714	.	.	Gsy1g000682	.
Gfa1g000715	Gst1g000679	Gcy18g048796	Gsy1g000683	Gto1g000772
Gfa1g000716	.	.	.	.
Gfa1g000717	.	.	.	.
Gfa1g000718	Gst1g000680	Gcy18g048481	Gsy1g000684	Gto1g000773
Gfa1g000719	.	Gcy13g031876	.	Gto1g000774
Gfa1g000720	.	Gcy15g041321	.	Gto1g000775
Gfa1g000721	.	.	.	.
Gfa1g000722	.	.	.	.
Gfa1g000723	.	.	.	.
Gfa1g000724	.	.	.	.
Gfa1g000725	.	.	.	.
Gfa1g000726	.	.	.	.
Gfa1g000727	.	.	.	.
Gfa1g000728	.	.	.	.
Gfa1g000729	.	.	.	.
Gfa1g000730	Gst1g000681	Gcy18g048731	Gsy1g000687	Gto1g000779
Gfa1g000731	Gst1g000683	Gcy18g048733	Gsy1g000688	Gto1g000782
Gfa1g000732	Gst1g000684	Gcy18g048734	Gsy1g000689	Gto1g000783
Gfa1g000733	.	.	.	.
Gfa1g000734	.	Gcy18g048735	Gsy1g000690	Gto1g000784
Gfa1g000735	Gst1g000686	.	Gsy1g000695	Gto1g000791
Gfa1g000736	.	.	.	Gto1g000792
Gfa1g000737	.	.	.	.
Gfa1g000738	Gst1g000687	Gcy18g048744	Gsy1g000696	Gto1g000794
Gfa1g000739	.	Gcy1g000966	.	.
Gfa1g000740	.	.	.	.
Gfa1g000741	.	.	.	.
Gfa1g000742	.	.	.	.
Gfa1g000743	.	.	.	.
Gfa1g000744	.	.	.	.
Gfa1g000745	.	.	.	.
Gfa1g000746	.	Gcy20g053259	.	.
Gfa1g000747	.	.	.	.
Gfa1g000748	Gst1g000690	Gcy18g048745	Gsy1g000699	.
Gfa1g000749	.	.	.	.
Gfa1g000750	.	.	.	.
Gfa1g000751	.	Gcy18g048754	.	.
Gfa1g000752	Gst1g000694	Gcy18g048749	Gsy1g000703	Gto1g000796
Gfa1g000753	Gst1g000697	Gcy18g048757	Gsy15g039458	Gto9g025276
Gfa1g000754	Gst1g000710	Gcy18g048806	Gsy1g000720	Gto1g000813
Gfa1g000755	Gst1g000708	Gcy18g048798	Gsy1g000725	Gto1g000830
Gfa1g000756	Gst3g005394	Gcy18g048805	Gsy1g000721	Gto1g000828
Gfa1g000757	.	.	.	.
Gfa1g000758	.	.	.	Gto7g019093
Gfa1g000759	Gst1g000702	Gcy18g048764	Gsy1g000713	Gto1g000811
Gfa1g000760	Gst1g000704	Gcy8g019665	Gsy17g045760	Gto16g044235
Gfa1g000761	.	.	.	.
Gfa1g000762	Gst1g000711	.	Gsy1g000723	Gto1g000814
Gfa1g000763	.	Gcy18g048563	.	Gto1g000816
Gfa1g000764	.	.	.	Gto1g000817
Gfa1g000765	.	Gcy18g048814	.	.
Gfa1g000766	.	.	.	.
Gfa1g000767	Gst1g000685	Gcy18g048737	Gsy1g000694	Gto1g000789
Gfa1g000768	.	.	.	.
Gfa1g000769	.	.	.	.
Gfa1g000770	Gst1g001216	Gcy1g001184	Gsy1g001248	Gto1g001424
Gfa1g000771	Gst1g001215	Gcy1g001183	Gsy1g001246	Gto1g001422
Gfa1g000772	.	.	.	.
Gfa1g000773	Gst1g000705	.	Gsy1g000717	Gto1g000822
Gfa1g000774	.	.	.	.
Gfa1g000775	Gst1g000707	Gcy18g048800	Gsy1g000724	Gto1g000841
Gfa1g000776	Gst8g021149	Gcy18g048803	Gsy1g000726	Gto1g000836
Gfa1g000777	Gst1g000713	Gcy8g019664	Gsy1g000727	Gto1g000837
Gfa1g000778	.	.	Gsy8g021503	Gto1g000838
Gfa1g000779	.	.	.	.
Gfa1g000780	Gst1g000715	Gcy18g048486	Gsy1g000737	Gto1g000844
Gfa1g000781	Gst1g000716	.	.	.
Gfa1g000782	Gst8g021157	Gcy8g019659	Gsy8g021500	Gto10g025998
Gfa1g000783	.	.	.	.
Gfa1g000784	.	.	.	.
Gfa1g000785	Gst14g037183	.	.	.
Gfa1g000786	.	.	.	.
Gfa1g000787	Gst1g000725	Gcy18g048494	Gsy1g000740	Gto1g000848
Gfa1g000788	Gst1g000726	Gcy18g048495	Gsy1g000741	Gto1g000849
Gfa1g000789	.	.	Gsy1g000742	Gto1g000851
Gfa1g000790	Gst1g000727	Gcy18g048496	Gsy8g021493	Gto1g000852
Gfa1g000791	.	.	.	.
Gfa1g000792	Gst18g049261	.	.	.
Gfa1g000793	.	Gcy18g048497	Gsy1g000745	Gto1g000854
Gfa1g000794	Gst1g000740	Gcy18g048461	Gsy1g000760	Gto1g000867
Gfa1g000795	.	.	.	.
Gfa1g000796	Gst8g019872	Gcy8g019579	Gsy8g021421	Gto10g026084
Gfa1g000797	.	.	.	.
Gfa1g000798	Gst1g001819	.	.	.
Gfa1g000799	.	.	.	.
Gfa1g000800	.	.	.	.
Gfa1g000801	Gst1g000735	Gcy18g048462	Gsy1g000757	Gto1g000866
Gfa1g000802	.	.	.	.
Gfa1g000803	.	.	.	.
Gfa1g000804	.	.	.	.
Gfa1g000805	.	.	.	.
Gfa1g000806	Gst1g000734	Gcy18g048466	Gsy1g000756	Gto1g000864
Gfa1g000807	.	.	Gsy1g000755	Gto1g000863
Gfa1g000808	.	.	.	.
Gfa1g000809	Gst1g000733	.	Gsy1g000754	Gto1g000861
Gfa1g000810	Gst1g000731	Gcy18g048506	Gsy1g000751	Gto1g000860
Gfa1g000811	Gst1g000730	Gcy18g048505	Gsy1g000750	Gto1g000859
Gfa1g000812	.	.	.	.
Gfa1g000813	.	.	.	.
Gfa1g000814	Gst1g000729	Gcy18g048504	Gsy1g000749	Gto1g000858
Gfa1g000815	.	.	.	.
Gfa1g000816	.	Gcy15g041522	.	.
Gfa1g000817	.	.	.	.
Gfa1g000818	.	.	.	.
Gfa1g000819	.	.	.	.
Gfa1g000820	.	.	.	.
Gfa1g000821	.	Gcy18g048500	Gsy1g000746	Gto1g000856
Gfa1g000822	.	.	.	.
Gfa1g000823	.	.	.	.
Gfa1g000824	.	.	.	.
Gfa1g000825	Gst1g000786	Gcy15g041593	Gsy1g000843	Gto1g000952
Gfa1g000826	.	.	.	.
Gfa1g000827	.	.	.	.
Gfa1g000828	Gst1g000792	Gcy18g048477	Gsy1g000834	Gto1g000939
Gfa1g000829	Gst1g000793	Gcy18g048409	Gsy1g000829	Gto1g000936
Gfa1g000830	.	.	.	.
Gfa1g000831	Gst1g000795	Gcy8g019593	.	.
Gfa1g000832	Gst8g019883	Gcy8g019594	Gsy8g021435	.
Gfa1g000833	Gst1g000796	Gcy18g048411	Gsy1g000821	Gto1g000935
Gfa1g000834	.	.	Gsy1g000810	.
Gfa1g000835	.	.	Gsy1g000814	.
Gfa1g000836	Gst1g000799	Gcy18g048413	Gsy1g000813	Gto1g000932
Gfa1g000837	.	.	.	.
Gfa1g000838	.	.	.	.
Gfa1g000839	.	Gcy18g048425	Gsy2g002796	.
Gfa1g000840	.	Gcy18g048426	Gsy1g000804	Gto1g000929
Gfa1g000841	Gst1g000802	Gcy18g048415	Gsy1g000808	Gto1g000926
Gfa1g000842	Gst1g000806	Gcy18g048416	Gsy1g000811	Gto1g000924
Gfa1g000843	.	.	.	.
Gfa1g000844	.	.	.	.
Gfa1g000845	.	.	.	.
Gfa1g000846	.	.	.	.
Gfa1g000847	Gst1g000810	Gcy18g048418	Gsy1g000803	Gto1g000923
Gfa1g000848	Gst1g000811	Gcy18g048419	Gsy1g000802	Gto1g000921
Gfa1g000849	Gst8g019894	.	Gsy8g021452	Gto10g026054
Gfa1g000850	.	.	.	.
Gfa1g000851	.	.	.	.
Gfa1g000852	.	.	.	.
Gfa1g000853	.	.	.	.
Gfa1g000854	Gst1g000819	.	Gsy1g000790	.
Gfa1g000855	.	.	.	.
Gfa1g000856	.	.	.	.
Gfa1g000857	Gst1g000820	.	.	.
Gfa1g000858	.	.	.	.
Gfa1g000859	.	.	.	.
Gfa1g000860	Gst1g000821	Gcy18g048430	Gsy1g000787	Gto1g000967
Gfa1g000861	Gst8g019904	Gcy8g019621	.	Gto1g000968
Gfa1g000862	.	.	.	.
Gfa1g000863	Gst1g000823	Gcy18g048432	Gsy1g000782	.
Gfa1g000864	.	.	.	.
Gfa1g000865	.	.	.	.
Gfa1g000866	.	.	.	.
Gfa1g000867	.	Gcy6g014656	.	Gto3g006620
Gfa1g000868	.	.	Gsy12g033019	.
Gfa1g000869	.	.	.	.
Gfa1g000870	Gst1g000825	Gcy18g048442	Gsy1g000780	Gto1g000970
Gfa1g000871	Gst1g000829	Gcy8g019627	Gsy1g000777	Gto1g000974
Gfa1g000872	Gst1g000830	Gcy8g019626	Gsy1g000778	Gto1g000975
Gfa1g000873	Gst1g000831	Gcy8g019629	Gsy1g000775	Gto1g000976
Gfa1g000874	.	.	.	.
Gfa1g000875	.	.	.	.
Gfa1g000876	.	.	.	.
Gfa1g000877	.	.	.	.
Gfa1g000878	Gst9g023324	Gcy12g031409	Gsy17g045886	Gto17g048101
Gfa1g000879	Gst1g000832	Gcy8g019631	Gsy1g000774	Gto1g000978
Gfa1g000880	.	.	.	.
Gfa1g000881	.	.	.	.
Gfa1g000882	Gst1g000837	Gcy18g048449	Gsy1g000770	Gto1g000987
Gfa1g000883	.	.	.	.
Gfa1g000884	.	.	.	.
Gfa1g000885	Gst1g000838	Gcy18g048450	Gsy1g000769	Gto1g000989
Gfa1g000886	Gst1g000839	Gcy18g048452	Gsy1g000768	Gto1g000990
Gfa1g000887	Gst16g042697	Gcy16g043742	Gsy16g042871	Gto16g044478
Gfa1g000888	.	.	.	.
Gfa1g000889	Gst1g000840	Gcy18g048456	Gsy1g000766	Gto1g000991
Gfa1g000890	.	.	.	.
Gfa1g000891	.	.	.	.
Gfa1g000892	.	.	.	.
Gfa1g000893	.	.	.	.
Gfa1g000894	.	.	.	.
Gfa1g000895	.	.	.	.
Gfa1g000896	.	.	.	.
Gfa1g000897	.	.	.	.
Gfa1g000898	.	.	.	.
Gfa1g000899	.	.	.	.
Gfa1g000900	.	.	.	.
Gfa1g000901	.	.	.	.
Gfa1g000902	Gst1g000780	Gcy18g047907	Gsy1g000851	Gto1g000872
Gfa1g000903	.	.	Gsy1g000852	.
Gfa1g000904	Gst1g000779	Gcy18g048522	Gsy1g000853	Gto1g000874
Gfa1g000905	Gst1g000765	Gcy18g048514	Gsy1g000870	Gto1g000883
Gfa1g000906	Gst18g047848	Gcy19g052773	Gsy20g053778	Gto16g043396
Gfa1g000907	Gst1g000766	Gcy18g048515	Gsy1g000869	Gto1g000880
Gfa1g000908	Gst1g000768	Gcy18g048518	Gsy1g000865	Gto1g000879
Gfa1g000909	.	.	.	.
Gfa1g000910	.	.	.	.
Gfa1g000911	.	.	.	.
Gfa1g000912	.	.	.	.
Gfa1g000913	.	.	.	.
Gfa1g000914	.	Gcy18g047858	.	.
Gfa1g000915	Gst1g000775	.	Gsy1g000864	Gto1g000878
Gfa1g000916	.	.	.	.
Gfa1g000917	.	.	.	.
Gfa1g000918	.	Gcy10g023919	Gsy20g053454	.
Gfa1g000919	Gst1g000776	Gcy12g031204	Gsy1g000862	Gto1g000877
Gfa1g000920	Gst1g000777	Gcy18g048525	Gsy1g000858	Gto1g000876
Gfa1g000921	.	.	.	.
Gfa1g000922	.	.	.	.
Gfa1g000923	.	.	.	.
Gfa1g000924	Gst8g019259	Gcy15g041808	Gsy18g047743	Gto18g051487
Gfa1g000925	.	.	Gsy15g040932	Gto15g042539
Gfa1g000926	Gst1g000778	Gcy18g048523	.	Gto1g000875
Gfa1g000927	Gst1g000762	Gcy18g048513	Gsy1g000871	Gto1g000885
Gfa1g000928	.	.	.	.
Gfa1g000929	Gst20g053772	Gcy10g023858	Gsy20g053415	Gto10g027441
Gfa1g000930	.	.	.	.
Gfa1g000931	Gst5g010792	.	.	.
Gfa1g000932	Gst2g002656	.	.	.
Gfa1g000933	Gst1g000759	.	Gsy1g000875	Gto1g000888
Gfa1g000934	.	.	.	.
Gfa1g000935	.	.	.	.
Gfa1g000936	.	.	.	.
Gfa1g000937	Gst1g000757	Gcy18g048509	Gsy1g000877	Gto1g000894
Gfa1g000938	.	.	.	.
Gfa1g000939	.	.	.	.
Gfa1g000940	Gst1g001068	Gcy18g048779	Gsy1g000907	Gto1g001023
Gfa1g000941	Gst1g001069	Gcy1g002171	Gsy1g002252	Gto1g002418
Gfa1g000942	Gst1g000756	Gcy18g048508	Gsy1g000878	Gto1g000896
Gfa1g000943	.	.	.	.
Gfa1g000944	Gst1g000755	.	Gsy1g000880	Gto20g055562
Gfa1g000945	Gst15g040112	Gcy2g003015	Gsy15g039972	Gto15g041561
Gfa1g000946	Gst1g000754	Gcy18g048469	Gsy10g027972	Gto1g000897
Gfa1g000947	.	.	.	.
Gfa1g000948	Gst1g000750	Gcy18g048470	Gsy1g000882	Gto1g000900
Gfa1g000949	Gst15g041140	Gcy13g033271	Gsy12g033296	.
Gfa1g000950	.	.	Gsy1g000697	.
Gfa1g000951	.	.	.	.
Gfa1g000952	Gst1g001052	Gcy18g048725	Gsy1g000888	Gto1g000903
Gfa1g000953	Gst5g010635	Gcy5g010541	Gsy1g000889	Gto1g000904
Gfa1g000954	Gst1g001059	Gcy18g048560	Gsy1g000902	Gto1g000997
Gfa1g000955	.	Gcy18g048724	.	.
Gfa1g000956	.	.	.	.
Gfa1g000957	Gst1g001058	Gcy18g048723	.	.
Gfa1g000958	Gst1g001056	Gcy18g048721	Gsy1g000897	Gto1g000871
Gfa1g000959	.	.	Gsy1g000893	.
Gfa1g000960	.	.	.	.
Gfa1g000961	Gst1g001055	Gcy18g048720	Gsy1g000891	Gto1g000907
Gfa1g000962	Gst1g001054	Gcy18g048719	Gsy8g020344	Gto8g020878
Gfa1g000963	.	.	.	.
Gfa1g000964	Gst1g001060	Gcy18g048561	Gsy1g000903	Gto2g004739
Gfa1g000965	.	.	.	.
Gfa1g000966	.	.	.	.
Gfa1g000967	.	.	.	.
Gfa1g000968	.	.	Gsy7g016683	.
Gfa1g000969	.	.	.	.
Gfa1g000970	.	.	.	.
Gfa1g000971	.	.	.	.
Gfa1g000972	.	.	.	.
Gfa1g000973	.	.	.	.
Gfa1g000974	.	.	Gsy19g050469	Gto4g009600
Gfa1g000975	.	.	.	Gto1g000984
Gfa1g000976	.	.	.	.
Gfa1g000977	.	.	.	.
Gfa1g000978	.	.	.	.
Gfa1g000979	Gst1g001072	Gcy18g048714	Gsy1g000915	Gto1g001006
Gfa1g000980	.	.	.	.
Gfa1g000981	.	.	.	Gto1g001218
Gfa1g000982	.	Gcy1g000954	.	.
Gfa1g000983	Gst1g000996	Gcy18g048480	Gsy1g000923	Gto1g001001
Gfa1g000984	Gst1g000997	.	.	.
Gfa1g000985	.	Gcy18g048728	.	Gto1g001073
Gfa1g000986	Gst1g000994	Gcy18g048727	Gsy1g000921	Gto1g001071
Gfa1g000987	Gst1g001033	Gcy18g048726	Gsy1g000920	Gto1g001070
Gfa1g000988	.	.	.	.
Gfa1g000989	Gst1g001032	Gcy18g048471	Gsy1g000919	Gto1g001009
Gfa1g000990	Gst1g000972	Gcy18g048534	Gsy1g000924	Gto1g001002
Gfa1g000991	.	.	.	.
Gfa1g000992	Gst1g000974	.	.	.
Gfa1g000993	Gst1g000983	Gcy18g048540	Gsy9g023512	Gto5g011435
Gfa1g000994	.	.	.	.
Gfa1g000995	.	.	.	.
Gfa1g000996	Gst1g000980	Gcy18g048539	.	.
Gfa1g000997	.	.	.	.
Gfa1g000998	.	.	.	.
Gfa1g000999	.	.	.	.
Gfa1g001000	.	.	.	.
Gfa1g001001	.	.	.	.
Gfa1g001002	.	.	.	.
Gfa1g001003	Gst1g000849	Gcy18g048386	Gsy1g000951	Gto1g001049
Gfa1g001004	.	.	.	.
Gfa1g001005	Gst1g000848	Gcy18g048388	Gsy1g000955	Gto1g001046
Gfa1g001006	Gst1g000846	Gcy18g048390	.	.
Gfa1g001007	Gst1g000845	Gcy18g048391	Gsy1g000956	Gto1g001044
Gfa1g001008	Gst1g000844	.	Gsy1g000960	Gto1g001030
Gfa1g001009	Gst8g020509	.	Gsy8g020421	Gto8g020981
Gfa1g001010	.	.	.	.
Gfa1g001011	.	.	.	.
Gfa1g001012	.	.	.	.
Gfa1g001013	.	Gcy18g048395	.	Gto1g001031
Gfa1g001014	.	.	.	.
Gfa1g001015	Gst8g020507	Gcy8g018224	Gsy8g020420	Gto8g020980
Gfa1g001016	.	Gcy18g048397	.	Gto1g001041
Gfa1g001017	Gst1g000999	Gcy18g048396	Gsy1g000963	Gto1g001042
Gfa1g001018	.	.	.	.
Gfa1g001019	.	.	.	.
Gfa1g001020	.	.	.	.
Gfa1g001021	Gst1g001001	Gcy18g048399	Gsy1g000968	Gto1g001064
Gfa1g001022	.	.	.	.
Gfa1g001023	.	.	.	.
Gfa1g001024	.	.	.	.
Gfa1g001025	.	.	.	.
Gfa1g001026	Gst7g015830	Gcy6g014397	Gsy8g017963	.
Gfa1g001027	.	.	.	.
Gfa1g001028	Gst1g001002	Gcy18g048476	Gsy1g000969	Gto1g001062
Gfa1g001029	.	.	.	.
Gfa1g001030	.	.	.	.
Gfa1g001031	.	.	.	.
Gfa1g001032	Gst1g001019	Gcy18g048403	Gsy1g000975	Gto1g001054
Gfa1g001033	.	Gcy18g048402	.	.
Gfa1g001034	Gst1g001017	Gcy13g031822	Gsy15g038972	Gto9g024793
Gfa1g001035	.	.	.	.
Gfa1g001036	Gst18g047318	Gcy5g010468	Gsy20g054116	.
Gfa1g001037	.	.	.	.
Gfa1g001038	Gst8g020490	Gcy8g018303	Gsy8g020410	Gto8g020963
Gfa1g001039	Gst1g001007	.	.	Gto1g001058
Gfa1g001040	Gst1g001021	Gcy18g048401	Gsy1g000980	Gto1g000998
Gfa1g001041	.	Gcy19g052341	.	.
Gfa1g001042	Gst1g000991	Gcy18g048550	Gsy1g000944	Gto1g001013
Gfa1g001043	.	.	Gsy1g000945	Gto1g001012
Gfa1g001044	.	.	Gsy4g009108	.
Gfa1g001045	Gst1g000993	Gcy4g008689	Gsy1g000943	Gto1g001014
Gfa1g001046	Gst20g054705	Gcy20g055385	Gsy20g054272	Gto20g055874
Gfa1g001047	.	.	.	.
Gfa1g001048	.	.	.	.
Gfa1g001049	.	Gcy16g043530	.	.
Gfa1g001050	.	.	.	.
Gfa1g001051	.	.	.	Gto15g041232
Gfa1g001052	Gst11g030138	Gcy18g048548	Gsy1g000941	Gto1g001017
Gfa1g001053	Gst1g001031	Gcy18g048547	Gsy1g000940	Gto1g001018
Gfa1g001054	Gst11g030137	Gcy11g027771	Gsy11g030201	Gto11g030482
Gfa1g001055	Gst1g001030	Gcy18g048546	Gsy1g000937	Gto1g001019
Gfa1g001056	Gst1g001029	Gcy18g048544	Gsy1g000935	Gto1g001020
Gfa1g001057	.	.	.	.
Gfa1g001058	Gst1g000990	Gcy15g041329	Gsy8g021542	Gto18g049024
Gfa1g001059	Gst17g045189	.	.	Gto5g011249
Gfa1g001060	.	.	Gsy19g049546	.
Gfa1g001061	Gst1g000987	Gcy18g048553	Gsy1g000949	Gto1g001069
Gfa1g001062	.	Gcy18g048554	.	.
Gfa1g001063	Gst11g030134	Gcy18g048555	.	Gto1g001068
Gfa1g001064	.	.	.	.
Gfa1g001065	Gst1g000985	Gcy18g048474	Gsy1g000979	Gto1g001038
Gfa1g001066	.	.	.	.
Gfa1g001067	Gst17g045902	Gcy7g016942	Gsy15g040338	Gto3g005965
Gfa1g001068	.	.	.	.
Gfa1g001069	.	.	.	.
Gfa1g001070	.	.	.	.
Gfa1g001071	Gst1g001065	Gcy18g048773	Gsy1g000908	Gto1g001027
Gfa1g001072	.	.	.	.
Gfa1g001073	.	.	.	.
Gfa1g001074	.	.	.	.
Gfa1g001075	Gst3g005395	Gcy1g000732	Gsy1g001018	Gto3g006330
Gfa1g001076	.	.	.	.
Gfa1g001077	.	.	.	.
Gfa1g001078	Gst1g000884	Gcy1g000733	Gsy1g001019	Gto1g001123
Gfa1g001079	.	Gcy20g053964	Gsy2g003005	Gto4g009623
Gfa1g001080	.	.	.	.
Gfa1g001081	.	.	.	.
Gfa1g001082	.	.	.	.
Gfa1g001083	.	.	.	.
Gfa1g001084	.	.	.	.
Gfa1g001085	.	.	Gsy2g002801	.
Gfa1g001086	.	.	.	.
Gfa1g001087	.	.	Gsy16g042556	.
Gfa1g001088	Gst1g000872	Gcy1g000877	Gsy1g001000	Gto1g001093
Gfa1g001089	.	.	.	.
Gfa1g001090	Gst19g050664	.	.	.
Gfa1g001091	.	.	.	.
Gfa1g001092	Gst1g000871	Gcy1g000875	Gsy1g000999	Gto1g001091
Gfa1g001093	Gst1g000869	Gcy1g000873	Gsy3g006028	Gto1g001090
Gfa1g001094	Gst1g000868	Gcy1g000872	Gsy1g000997	Gto1g001089
Gfa1g001095	Gst1g000866	Gcy1g000868	Gsy1g000995	Gto1g001088
Gfa1g001096	.	.	.	.
Gfa1g001097	Gst1g000863	Gcy18g048377	Gsy1g000992	Gto1g001083
Gfa1g001098	.	.	.	.
Gfa1g001099	.	.	.	.
Gfa1g001100	.	.	.	.
Gfa1g001101	Gst1g000862	.	Gsy1g000991	.
Gfa1g001102	.	.	.	.
Gfa1g001103	.	.	.	.
Gfa1g001104	Gst1g000860	Gcy18g048385	Gsy1g000983	Gto1g001032
Gfa1g001105	.	.	.	.
Gfa1g001106	.	.	.	.
Gfa1g001107	.	.	.	Gto2g003543
Gfa1g001108	Gst1g000856	Gcy18g048381	Gsy1g000982	Gto1g001074
Gfa1g001109	.	.	.	.
Gfa1g001110	.	.	.	.
Gfa1g001111	.	.	.	.
Gfa1g001112	.	.	.	.
Gfa1g001113	Gst1g000859	.	Gsy1g000981	.
Gfa1g001114	Gst1g000858	.	.	.
Gfa1g001115	.	.	.	.
Gfa1g001116	.	.	.	.
Gfa1g001117	Gst1g000850	Gcy8g018266	Gsy1g000978	Gto1g001052
Gfa1g001118	.	.	.	.
Gfa1g001119	.	.	.	.
Gfa1g001120	.	.	.	Gto8g020973
Gfa1g001121	Gst1g000977	Gcy18g048535	Gsy1g000928	Gto1g001005
Gfa1g001122	.	.	.	.
Gfa1g001123	.	.	.	.
Gfa1g001124	Gst1g001026	Gcy18g048542	Gsy1g000931	.
Gfa1g001125	Gst11g030303	Gcy11g027826	Gsy10g026136	Gto11g030567
Gfa1g001126	.	.	.	.
Gfa1g001127	Gst1g001023	.	.	.
Gfa1g001128	.	.	.	.
Gfa1g001129	.	.	.	.
Gfa1g001130	.	.	.	.
Gfa1g001131	Gst9g025147	Gcy8g018173	Gsy9g025179	Gto18g050249
Gfa1g001132	.	.	.	.
Gfa1g001133	.	.	.	.
Gfa1g001134	.	.	.	.
Gfa1g001135	.	.	.	.
Gfa1g001136	Gst6g014582	Gcy6g013993	Gsy6g014730	Gto20g055057
Gfa1g001137	.	.	.	.
Gfa1g001138	.	.	Gsy4g009135	.
Gfa1g001139	.	.	Gsy1g001033	Gto1g001141
Gfa1g001140	.	.	.	.
Gfa1g001141	Gst1g000915	Gcy15g040244	Gsy18g047950	Gto18g051256
Gfa1g001142	.	.	.	.
Gfa1g001143	.	.	.	.
Gfa1g001144	Gst1g000914	Gcy1g000760	Gsy1g001054	Gto1g001166
Gfa1g001145	.	.	.	.
Gfa1g001146	.	.	.	.
Gfa1g001147	.	.	.	.
Gfa1g001148	.	.	.	.
Gfa1g001149	.	.	.	.
Gfa1g001150	Gst7g018377	.	Gsy7g016293	Gto7g018772
Gfa1g001151	.	.	.	.
Gfa1g001152	Gst7g018375	Gcy7g016676	Gsy7g016294	Gto7g018773
Gfa1g001153	.	.	.	.
Gfa1g001154	.	.	.	.
Gfa1g001155	.	.	.	.
Gfa1g001156	Gst7g018374	Gcy7g016675	Gsy7g016296	.
Gfa1g001157	.	.	.	.
Gfa1g001158	.	.	.	.
Gfa1g001159	.	.	.	.
Gfa1g001160	Gst1g000918	Gcy3g005276	.	Gto1g001175
Gfa1g001161	.	.	.	.
Gfa1g001162	.	Gcy1g000744	Gsy1g001039	Gto1g001146
Gfa1g001163	.	.	.	.
Gfa1g001164	.	.	.	.
Gfa1g001165	.	.	.	.
Gfa1g001166	.	.	.	.
Gfa1g001167	.	.	.	.
Gfa1g001168	.	.	Gsy15g040348	.
Gfa1g001169	Gst1g000896	Gcy1g000528	Gsy1g001038	Gto1g001145
Gfa1g001170	.	.	.	.
Gfa1g001171	.	.	.	.
Gfa1g001172	Gst1g000925	Gcy1g000965	Gsy1g001066	Gto1g001177
Gfa1g001173	.	.	.	.
Gfa1g001174	.	.	Gsy1g001029	.
Gfa1g001175	.	.	.	.
Gfa1g001176	.	.	.	.
Gfa1g001177	.	.	.	.
Gfa1g001178	Gst18g047247	Gcy9g020714	Gsy18g046868	Gto9g023714
Gfa1g001179	.	.	.	.
Gfa1g001180	.	.	Gsy4g009136	.
Gfa1g001181	.	.	.	.
Gfa1g001182	.	.	.	.
Gfa1g001183	.	.	.	.
Gfa1g001184	.	.	.	.
Gfa1g001185	.	.	.	.
Gfa1g001186	.	.	.	.
Gfa1g001187	.	.	.	.
Gfa1g001188	.	.	.	.
Gfa1g001189	.	.	.	.
Gfa1g001190	.	.	.	.
Gfa1g001191	.	.	.	.
Gfa1g001192	Gst14g037593	Gcy14g035825	Gsy14g037410	Gto14g038213
Gfa1g001193	.	.	.	.
Gfa1g001194	Gst1g001158	Gcy1g001130	Gsy1g001180	Gto1g001351
Gfa1g001195	.	.	.	.
Gfa1g001196	.	.	.	.
Gfa1g001197	.	.	.	.
Gfa1g001198	.	.	.	.
Gfa1g001199	.	Gcy3g005210	.	Gto1g001355
Gfa1g001200	Gst1g001159	Gcy1g001134	Gsy1g001181	Gto1g001356
Gfa1g001201	.	.	.	.
Gfa1g001202	Gst1g001160	Gcy1g001136	Gsy1g001182	Gto1g001358
Gfa1g001203	Gst17g045337	Gcy17g046177	.	.
Gfa1g001204	Gst1g001163	Gcy1g001137	Gsy1g001184	Gto1g001359
Gfa1g001205	.	.	.	.
Gfa1g001206	.	.	.	.
Gfa1g001207	.	.	.	.
Gfa1g001208	.	.	.	.
Gfa1g001209	.	.	.	.
Gfa1g001210	.	.	.	.
Gfa1g001211	.	.	.	.
Gfa1g001212	.	.	.	.
Gfa1g001213	.	.	Gsy2g002706	Gto12g033818
Gfa1g001214	.	.	.	.
Gfa1g001215	.	.	.	.
Gfa1g001216	.	.	.	.
Gfa1g001217	.	.	.	.
Gfa1g001218	.	.	.	.
Gfa1g001219	.	.	.	.
Gfa1g001220	.	.	.	.
Gfa1g001221	Gst1g001172	Gcy3g005214	Gsy1g001187	Gto1g001369
Gfa1g001222	Gst1g001173	Gcy3g005215	Gsy1g001188	Gto1g001370
Gfa1g001223	.	.	.	.
Gfa1g001224	.	.	.	.
Gfa1g001225	.	.	.	.
Gfa1g001226	.	.	.	.
Gfa1g001227	.	.	Gsy1g001190	.
Gfa1g001228	.	.	.	.
Gfa1g001229	.	.	.	.
Gfa1g001230	.	.	Gsy1g001189	.
Gfa1g001231	.	.	.	.
Gfa1g001232	.	.	.	.
Gfa1g001233	.	.	.	.
Gfa1g001234	.	.	.	.
Gfa1g001235	.	.	.	.
Gfa1g001236	.	.	.	.
Gfa1g001237	.	.	Gsy1g001191	.
Gfa1g001238	Gst1g001177	Gcy1g001154	Gsy1g001196	Gto1g001376
Gfa1g001239	.	.	.	.
Gfa1g001240	.	.	.	.
Gfa1g001241	Gst1g001180	Gcy1g001156	Gsy1g001198	Gto1g001379
Gfa1g001242	.	.	.	.
Gfa1g001243	.	.	.	.
Gfa1g001244	Gst1g001181	Gcy1g001158	.	.
Gfa1g001245	Gst1g001182	Gcy1g001159	Gsy1g001201	Gto1g001381
Gfa1g001246	Gst1g001183	Gcy3g005223	Gsy1g001202	Gto1g001383
Gfa1g001247	Gst1g001184	Gcy1g000386	Gsy1g001203	Gto3g006514
Gfa1g001248	Gst1g001185	Gcy3g005225	Gsy1g001205	Gto11g030367
Gfa1g001249	Gst1g001187	Gcy1g001165	Gsy1g001207	Gto1g001384
Gfa1g001250	Gst1g001188	Gcy1g001164	Gsy1g001208	Gto1g001385
Gfa1g001251	.	.	.	.
Gfa1g001252	.	.	.	.
Gfa1g001253	.	Gcy8g018957	Gsy1g001217	.
Gfa1g001254	.	.	Gsy10g026375	.
Gfa1g001255	Gst14g037836	.	.	.
Gfa1g001256	Gst3g005215	Gcy3g005164	Gsy3g005336	.
Gfa1g001257	.	.	.	.
Gfa1g001258	.	.	.	.
Gfa1g001259	.	.	.	.
Gfa1g001260	.	.	.	.
Gfa1g001261	.	.	.	.
Gfa1g001262	Gst1g000910	Gcy19g051049	Gsy1g001052	Gto1g001163
Gfa1g001263	.	.	.	Gto1g001164
Gfa1g001264	.	.	.	.
Gfa1g001265	Gst1g000904	Gcy1g000754	Gsy1g001049	Gto1g001157
Gfa1g001266	Gst1g000903	Gcy1g000752	Gsy1g001048	Gto1g001152
Gfa1g001267	Gst1g000902	Gcy1g000750	Gsy1g001047	Gto1g001151
Gfa1g001268	Gst4g008426	Gcy4g008166	Gsy1g000860	Gto19g052403
Gfa1g001269	.	.	.	.
Gfa1g001270	.	.	.	.
Gfa1g001271	.	.	.	.
Gfa1g001272	.	.	Gsy1g001044	Gto1g001147
Gfa1g001273	.	.	.	.
Gfa1g001274	.	.	.	.
Gfa1g001275	.	.	.	.
Gfa1g001276	.	.	.	.
Gfa1g001277	.	.	Gsy1g001023	Gto3g006327
Gfa1g001278	Gst1g000891	Gcy1g000736	Gsy1g001024	Gto1g001127
Gfa1g001279	.	.	.	.
Gfa1g001280	Gst18g047409	Gcy18g047876	Gsy18g047018	Gto2g004210
Gfa1g001281	.	.	.	.
Gfa1g001282	.	.	.	.
Gfa1g001283	.	.	.	.
Gfa1g001284	.	.	.	.
Gfa1g001285	.	.	Gsy11g030295	Gto20g054881
Gfa1g001286	.	.	.	.
Gfa1g001287	Gst14g036406	Gcy14g034585	Gsy14g036227	Gto14g039335
Gfa1g001288	.	.	.	.
Gfa1g001289	.	.	.	Gto1g001142
Gfa1g001290	.	.	.	.
Gfa1g001291	.	.	.	.
Gfa1g001292	.	.	.	.
Gfa1g001293	.	.	.	.
Gfa1g001294	.	.	.	.
Gfa1g001295	.	.	.	.
Gfa1g001296	.	.	.	.
Gfa1g001297	Gst4g008792	.	.	.
Gfa1g001298	.	.	Gsy4g008704	.
Gfa1g001299	.	.	.	.
Gfa1g001300	Gst1g000930	Gcy1g000962	Gsy3g005517	Gto1g001179
Gfa1g001301	.	Gcy16g043359	Gsy1g001069	Gto1g001180
Gfa1g001302	Gst1g000931	Gcy1g000960	Gsy1g001070	Gto1g001182
Gfa1g001303	Gst1g000936	.	Gsy1g001073	Gto1g001184
Gfa1g001304	Gst1g000937	Gcy1g001024	Gsy1g001074	Gto3g006209
Gfa1g001305	Gst3g005353	Gcy3g005293	Gsy3g005512	.
Gfa1g001306	.	.	.	.
Gfa1g001307	Gst1g000771	Gcy13g031719	.	Gto12g033182
Gfa1g001308	.	.	.	.
Gfa1g001309	Gst1g000945	Gcy1g001026	Gsy1g001078	Gto1g001187
Gfa1g001310	Gst1g000949	Gcy4g006994	Gsy1g001089	.
Gfa1g001311	Gst1g000950	Gcy1g001029	Gsy1g001086	Gto1g001192
Gfa1g001312	Gst1g000952	.	.	.
Gfa1g001313	Gst1g001262	Gcy1g001032	Gsy7g017094	Gto7g019670
Gfa1g001314	.	Gcy1g001034	Gsy1g001090	.
Gfa1g001315	Gst3g005340	Gcy3g005306	Gsy3g005483	Gto1g001199
Gfa1g001316	Gst1g000960	Gcy1g001035	Gsy1g001091	Gto1g001200
Gfa1g001317	Gst1g000953	Gcy1g001039	Gsy1g001092	Gto1g001201
Gfa1g001318	.	.	.	.
Gfa1g001319	Gst1g000959	.	.	.
Gfa1g001320	.	.	.	.
Gfa1g001321	Gst1g000962	Gcy1g001041	Gsy1g001093	Gto1g001203
Gfa1g001322	.	.	.	.
Gfa1g001323	Gst1g000963	Gcy1g001042	Gsy1g001094	Gto1g001204
Gfa1g001324	Gst1g000964	Gcy1g001043	Gsy1g001099	Gto1g001205
Gfa1g001325	Gst1g000965	.	Gsy1g001100	Gto1g001207
Gfa1g001326	Gst1g000967	Gcy1g001045	Gsy1g001101	Gto3g006221
Gfa1g001327	Gst1g000969	Gcy1g001048	Gsy1g001103	Gto1g001215
Gfa1g001328	.	.	.	.
Gfa1g001329	.	.	.	.
Gfa1g001330	Gst1g000971	Gcy1g001049	Gsy1g001105	Gto1g001217
Gfa1g001331	.	.	.	.
Gfa1g001332	.	.	Gsy1g001107	Gto1g001220
Gfa1g001333	.	.	.	.
Gfa1g001334	.	.	.	.
Gfa1g001335	.	.	Gsy1g001109	Gto3g006213
Gfa1g001336	Gst1g001074	Gcy1g001056	Gsy1g001111	Gto1g001224
Gfa1g001337	Gst3g005309	Gcy3g005337	Gsy3g005449	Gto1g001222
Gfa1g001338	.	.	.	.
Gfa1g001339	.	.	.	.
Gfa1g001340	.	.	.	.
Gfa1g001341	.	.	Gsy1g001113	Gto1g001227
Gfa1g001342	.	Gcy1g001055	.	.
Gfa1g001343	.	.	.	.
Gfa1g001344	Gst1g001046	Gcy3g005197	Gsy1g001119	Gto3g006109
Gfa1g001345	.	.	.	.
Gfa1g001346	.	.	.	.
Gfa1g001347	.	Gcy20g054762	.	Gto13g033990
Gfa1g001348	.	.	.	.
Gfa1g001349	.	.	.	.
Gfa1g001350	Gst1g001076	Gcy1g001060	Gsy1g001123	Gto1g001234
Gfa1g001351	Gst1g001077	Gcy1g001062	Gsy1g001125	Gto1g001238
Gfa1g001352	Gst1g001078	Gcy1g001063	Gsy1g001126	Gto1g001239
Gfa1g001353	.	.	.	.
Gfa1g001354	.	.	.	.
Gfa1g001355	.	.	.	.
Gfa1g001356	.	.	.	.
Gfa1g001357	Gst1g001080	Gcy1g001070	Gsy1g001127	Gto1g001296
Gfa1g001358	.	.	.	.
Gfa1g001359	Gst1g001083	Gcy1g001071	Gsy1g001128	Gto1g001297
Gfa1g001360	Gst1g001084	.	Gsy1g001129	Gto1g001298
Gfa1g001361	.	.	.	.
Gfa1g001362	.	.	.	.
Gfa1g001363	.	.	.	.
Gfa1g001364	.	.	.	.
Gfa1g001365	Gst1g001090	Gcy1g001074	Gsy1g001131	Gto1g001300
Gfa1g001366	.	.	.	.
Gfa1g001367	.	Gcy1g001078	.	Gto1g001197
Gfa1g001368	.	.	.	.
Gfa1g001369	.	.	.	.
Gfa1g001370	Gst1g001091	Gcy1g001073	Gsy1g001132	Gto3g006190
Gfa1g001371	.	.	.	.
Gfa1g001372	.	.	.	.
Gfa1g001373	.	.	Gsy11g030291	.
Gfa1g001374	.	.	.	.
Gfa1g001375	.	.	.	.
Gfa1g001376	.	.	.	.
Gfa1g001377	Gst1g001094	Gcy1g001080	.	Gto1g001303
Gfa1g001378	Gst3g005283	Gcy1g000412	Gsy19g050237	Gto9g024986
Gfa1g001379	.	.	.	.
Gfa1g001380	.	.	.	.
Gfa1g001381	Gst1g001152	Gcy1g001125	Gsy3g005370	Gto10g025843
Gfa1g001382	Gst1g001151	.	.	.
Gfa1g001383	.	.	.	.
Gfa1g001384	Gst1g001150	.	.	.
Gfa1g001385	Gst1g001148	.	.	.
Gfa1g001386	.	.	.	.
Gfa1g001387	Gst16g042708	Gcy1g001123	.	Gto1g001342
Gfa1g001388	Gst1g001147	Gcy1g001121	Gsy1g001167	Gto1g001341
Gfa1g001389	Gst1g001145	Gcy1g001119	Gsy1g001166	Gto1g001339
Gfa1g001390	Gst1g001146	Gcy1g001120	.	Gto1g001340
Gfa1g001391	.	.	.	Gto1g000829
Gfa1g001392	.	.	.	.
Gfa1g001393	Gst1g001144	.	.	.
Gfa1g001394	Gst3g005232	Gcy3g005192	Gsy3g005357	Gto3g006134
Gfa1g001395	.	.	.	.
Gfa1g001396	Gst1g001135	Gcy1g001110	Gsy1g001160	Gto1g001335
Gfa1g001397	Gst1g001130	Gcy1g001109	Gsy1g001159	Gto1g001334
Gfa1g001398	.	.	.	.
Gfa1g001399	.	.	.	.
Gfa1g001400	.	.	Gsy20g053510	.
Gfa1g001401	.	Gcy2g003730	Gsy2g003497	.
Gfa1g001402	.	.	.	.
Gfa1g001403	.	.	.	.
Gfa1g001404	.	.	.	.
Gfa1g001405	Gst1g001124	Gcy1g001106	Gsy1g001156	.
Gfa1g001406	Gst1g001120	.	.	.
Gfa1g001407	Gst1g001118	Gcy1g001105	Gsy1g001153	Gto1g001332
Gfa1g001408	Gst1g001117	Gcy15g041979	Gsy1g000140	Gto1g000128
Gfa1g001409	.	.	.	.
Gfa1g001410	.	.	.	.
Gfa1g001411	.	.	.	.
Gfa1g001412	.	.	.	.
Gfa1g001413	.	.	.	.
Gfa1g001414	.	.	.	.
Gfa1g001415	Gst1g001115	Gcy1g001100	Gsy1g001151	Gto1g001327
Gfa1g001416	.	.	.	.
Gfa1g001417	Gst1g001112	Gcy1g001098	Gsy1g001148	Gto1g001324
Gfa1g001418	Gst1g001111	Gcy1g001097	Gsy1g001147	Gto1g001323
Gfa1g001419	.	.	.	.
Gfa1g001420	Gst1g001110	Gcy1g001096	Gsy1g001146	Gto1g001322
Gfa1g001421	Gst1g001102	.	Gsy1g001142	Gto1g001316
Gfa1g001422	Gst1g001105	Gcy1g001091	Gsy1g001143	Gto1g001317
Gfa1g001423	Gst1g001097	Gcy1g001081	Gsy1g001137	Gto1g001308
Gfa1g001424	.	.	.	.
Gfa1g001425	.	Gcy1g001185	Gsy1g001251	.
Gfa1g001426	Gst1g001217	Gcy1g001188	Gsy1g001255	Gto1g001425
Gfa1g001427	Gst3g005187	Gcy3g005132	Gsy3g005309	Gto3g006076
Gfa1g001428	.	.	.	.
Gfa1g001429	.	.	.	.
Gfa1g001430	Gst3g005177	Gcy1g001192	Gsy1g001259	Gto1g001429
Gfa1g001431	.	.	.	.
Gfa1g001432	Gst1g001210	Gcy3g005144	Gsy1g001240	.
Gfa1g001433	Gst3g005196	Gcy3g005145	Gsy1g001239	.
Gfa1g001434	.	.	.	.
Gfa1g001435	Gst1g001206	Gcy1g001175	Gsy1g001236	Gto1g001412
Gfa1g001436	Gst1g001205	Gcy1g001176	Gsy1g001235	Gto1g001411
Gfa1g001437	.	Gcy20g054636	.	.
Gfa1g001438	.	.	.	.
Gfa1g001439	Gst1g001204	Gcy1g001177	Gsy1g001234	Gto1g001401
Gfa1g001440	Gst1g001203	Gcy1g001178	Gsy1g001233	Gto1g001409
Gfa1g001441	Gst1g001202	Gcy1g001179	Gsy1g001232	Gto1g001408
Gfa1g001442	Gst3g005205	Gcy3g005153	Gsy3g005327	Gto3g006093
Gfa1g001443	.	.	.	.
Gfa1g001444	.	.	.	.
Gfa1g001445	.	.	.	.
Gfa1g001446	.	.	.	.
Gfa1g001447	Gst3g005206	Gcy3g005154	Gsy3g005328	Gto1g001407
Gfa1g001448	.	Gcy18g049726	Gsy9g024901	.
Gfa1g001449	.	.	.	.
Gfa1g001450	Gst3g005209	Gcy3g005159	Gsy3g005331	Gto3g006098
Gfa1g001451	.	.	.	.
Gfa1g001452	.	.	.	.
Gfa1g001453	.	.	.	.
Gfa1g001454	.	.	Gsy18g048016	Gto20g055292
Gfa1g001455	.	.	.	.
Gfa1g001456	.	.	.	.
Gfa1g001457	.	.	.	Gto1g001352
Gfa1g001458	.	.	.	.
Gfa1g001459	Gst1g001208	Gcy1g001173	Gsy1g001238	Gto1g001415
Gfa1g001460	Gst3g005220	.	Gsy3g005341	.
Gfa1g001461	Gst1g001155	Gcy1g001129	Gsy1g001173	Gto1g001348
Gfa1g001462	Gst3g005240	Gcy1g001127	Gsy1g001172	Gto1g001346
Gfa1g001463	.	.	.	.
Gfa1g001464	.	Gcy1g001221	.	Gto1g001459
Gfa1g001465	Gst11g028682	Gcy11g026201	Gsy11g028660	.
Gfa1g001466	Gst3g005126	Gcy3g005071	Gsy3g005248	.
Gfa1g001467	Gst1g001266	Gcy1g001225	Gsy1g001290	Gto1g001463
Gfa1g001468	Gst1g001267	Gcy1g001226	Gsy3g005233	Gto3g005971
Gfa1g001469	.	.	.	.
Gfa1g001470	Gst1g001270	Gcy1g001227	Gsy1g001291	Gto1g001464
Gfa1g001471	.	.	Gsy3g005293	Gto3g006063
Gfa1g001472	Gst1g001230	Gcy14g036798	Gsy3g005213	Gto3g005895
Gfa1g001473	Gst1g001271	Gcy1g001228	Gsy1g001292	Gto1g001465
Gfa1g001474	Gst1g001272	Gcy1g001230	Gsy1g001294	Gto15g039921
Gfa1g001475	.	.	.	.
Gfa1g001476	Gst1g001256	Gcy1g001217	Gsy1g001281	Gto1g001458
Gfa1g001477	.	.	.	.
Gfa1g001478	.	.	.	.
Gfa1g001479	Gst1g001252	Gcy3g005078	.	Gto3g005986
Gfa1g001480	Gst18g046897	.	.	Gto2g003764
Gfa1g001481	.	.	.	.
Gfa1g001482	.	Gcy14g035161	Gsy19g049363	Gto10g027524
Gfa1g001483	Gst1g001251	Gcy1g001212	Gsy1g001278	Gto1g001454
Gfa1g001484	.	.	.	.
Gfa1g001485	Gst1g001250	.	Gsy1g001276	Gto1g001453
Gfa1g001486	Gst1g001249	Gcy1g001211	Gsy1g001275	Gto1g001450
Gfa1g001487	Gst1g001248	Gcy1g001210	Gsy1g000698	Gto15g039907
Gfa1g001488	Gst1g001242	Gcy17g046917	Gsy1g001273	Gto1g001446
Gfa1g001489	Gst1g001241	Gcy1g001207	Gsy1g001272	Gto1g001445
Gfa1g001490	Gst1g001240	Gcy3g005101	Gsy1g001271	Gto1g001443
Gfa1g001491	Gst1g001237	Gcy8g018255	.	Gto1g001442
Gfa1g001492	Gst1g001236	Gcy1g001203	Gsy1g001269	Gto1g001441
Gfa1g001493	Gst1g001234	Gcy1g001202	Gsy1g001267	Gto1g001440
Gfa1g001494	Gst1g001233	Gcy1g001201	Gsy1g001266	Gto1g001439
Gfa1g001495	Gst1g001276	.	Gsy1g001295	Gto1g001470
Gfa1g001496	.	.	.	.
Gfa1g001497	.	.	.	.
Gfa1g001498	.	.	.	.
Gfa1g001499	.	.	.	.
Gfa1g001500	.	.	.	.
Gfa1g001501	.	.	.	.
Gfa1g001502	.	.	.	.
Gfa1g001503	Gst7g018109	Gcy15g041083	Gsy15g039677	Gto15g041261
Gfa1g001504	.	.	.	.
Gfa1g001505	Gst1g001292	Gcy1g001247	.	Gto1g001494
Gfa1g001506	Gst1g001291	Gcy1g001246	.	Gto1g001493
Gfa1g001507	Gst1g001290	Gcy1g001245	.	Gto1g001492
Gfa1g001508	Gst1g001285	Gcy6g012533	.	Gto1g001481
Gfa1g001509	Gst1g001284	Gcy6g012534	Gsy1g001302	Gto1g001479
Gfa1g001510	.	.	.	Gto1g001478
Gfa1g001511	Gst1g001282	Gcy1g001242	Gsy1g001300	Gto1g001477
Gfa1g001512	Gst1g001280	Gcy1g001239	Gsy1g001299	Gto1g001475
Gfa1g001513	.	.	.	.
Gfa1g001514	Gst1g001278	Gcy1g001238	Gsy1g001298	Gto1g001474
Gfa1g001515	Gst1g001277	Gcy1g001236	Gsy1g001296	Gto1g001473
Gfa1g001516	.	.	.	.
Gfa1g001517	.	.	.	.
Gfa1g001518	Gst1g001293	.	.	Gto1g001498
Gfa1g001519	Gst1g001295	Gcy1g001249	.	Gto1g001500
Gfa1g001520	Gst6g014708	.	.	.
Gfa1g001521	.	.	.	.
Gfa1g001522	.	.	.	.
Gfa1g001523	.	.	.	.
Gfa1g001524	.	Gcy13g031602	.	.
Gfa1g001525	.	.	Gsy16g042829	.
Gfa1g001526	.	.	.	.
Gfa1g001527	Gst1g001301	.	.	.
Gfa1g001528	Gst1g001302	Gcy1g001252	.	Gto1g001505
Gfa1g001529	Gst1g001303	.	.	.
Gfa1g001530	.	.	.	Gto2g003475
Gfa1g001531	.	.	.	.
Gfa1g001532	.	.	.	.
Gfa1g001533	Gst1g001304	Gcy1g001253	.	.
Gfa1g001534	Gst1g001305	Gcy1g001256	.	.
Gfa1g001535	Gst1g001307	.	.	Gto1g001508
Gfa1g001536	.	.	Gsy1g001314	.
Gfa1g001537	Gst1g001308	Gcy1g001260	Gsy1g001315	Gto1g001511
Gfa1g001538	Gst1g001309	Gcy1g001262	.	Gto1g001512
Gfa1g001539	.	.	.	.
Gfa1g001540	Gst1g001311	Gcy1g001265	Gsy1g001317	Gto1g001517
Gfa1g001541	Gst1g001312	Gcy1g001266	Gsy1g001318	Gto1g001518
Gfa1g001542	Gst1g001313	Gcy1g001268	Gsy1g001319	Gto1g001519
Gfa1g001543	.	.	.	.
Gfa1g001544	Gst1g001318	Gcy1g001276	.	.
Gfa1g001545	Gst1g001319	Gcy1g001277	Gsy1g001322	Gto1g001527
Gfa1g001546	.	.	.	.
Gfa1g001547	Gst1g001321	Gcy1g001280	Gsy1g001323	Gto1g001528
Gfa1g001548	Gst1g001323	Gcy14g036834	Gsy1g001324	Gto1g001530
Gfa1g001549	Gst1g001324	Gcy1g001285	Gsy1g001326	.
Gfa1g001550	Gst1g001325	Gcy1g001286	Gsy1g001327	Gto1g001531
Gfa1g001551	Gst1g001330	Gcy1g001288	Gsy1g001329	Gto1g001533
Gfa1g001552	.	.	.	.
Gfa1g001553	.	.	.	.
Gfa1g001554	.	.	.	.
Gfa1g001555	.	.	.	.
Gfa1g001556	Gst1g001341	Gcy1g001299	Gsy1g001340	Gto1g001540
Gfa1g001557	.	.	.	.
Gfa1g001558	.	.	.	.
Gfa1g001559	.	.	.	.
Gfa1g001560	.	.	Gsy11g028324	Gto1g002724
Gfa1g001561	Gst1g001334	Gcy1g001295	Gsy1g001336	.
Gfa1g001562	Gst1g001336	Gcy1g001294	.	.
Gfa1g001563	.	.	.	.
Gfa1g001564	Gst1g001337	.	.	.
Gfa1g001565	Gst1g001333	Gcy1g001292	Gsy1g001334	Gto1g001535
Gfa1g001566	Gst1g001332	.	.	.
Gfa1g001567	.	.	.	Gto18g051502
Gfa1g001568	.	.	.	.
Gfa1g001569	.	Gcy1g001290	Gsy1g001331	Gto1g001534
Gfa1g001570	Gst1g001342	Gcy1g001301	Gsy1g001341	Gto1g001541
Gfa1g001571	Gst1g001343	Gcy1g001302	Gsy1g001342	Gto1g001542
Gfa1g001572	Gst1g001346	Gcy1g001303	Gsy1g001346	Gto1g001545
Gfa1g001573	Gst1g001347	.	.	Gto1g001546
Gfa1g001574	Gst1g001348	Gcy1g001304	Gsy1g001347	Gto1g001547
Gfa1g001575	.	.	.	.
Gfa1g001576	.	Gcy1g001305	Gsy1g001345	.
Gfa1g001577	Gst1g001351	Gcy1g001310	Gsy1g001355	Gto1g001554
Gfa1g001578	Gst1g001355	Gcy1g001312	.	Gto3g005815
Gfa1g001579	Gst1g001664	Gcy5g010194	Gsy1g001602	Gto1g001781
Gfa1g001580	.	.	.	.
Gfa1g001581	.	.	.	.
Gfa1g001582	Gst1g001360	Gcy1g001323	Gsy1g001361	Gto3g005806
Gfa1g001583	Gst1g001364	Gcy1g001328	Gsy1g001362	Gto1g001565
Gfa1g001584	Gst1g001365	Gcy1g001329	Gsy1g001364	Gto1g001564
Gfa1g001585	Gst1g001367	.	.	.
Gfa1g001586	Gst1g001369	Gcy1g001336	Gsy1g001365	Gto1g001560
Gfa1g001587	Gst1g001370	Gcy1g001337	Gsy1g001369	Gto1g001559
Gfa1g001588	.	Gcy9g020884	.	.
Gfa1g001589	.	.	.	.
Gfa1g001590	Gst1g001372	Gcy1g001339	Gsy1g001371	Gto1g001569
Gfa1g001591	.	.	.	.
Gfa1g001592	.	.	.	.
Gfa1g001593	.	.	.	.
Gfa1g001594	.	.	.	.
Gfa1g001595	.	.	.	.
Gfa1g001596	.	.	.	.
Gfa1g001597	.	.	.	.
Gfa1g001598	.	.	.	.
Gfa1g001599	.	.	.	.
Gfa1g001600	.	.	.	.
Gfa1g001601	Gst1g001380	Gcy1g001343	Gsy1g001376	Gto1g001573
Gfa1g001602	Gst6g012480	Gcy6g012205	Gsy1g001380	Gto1g001574
Gfa1g001603	Gst1g001385	Gcy13g032307	Gsy1g001382	Gto13g034630
Gfa1g001604	.	.	.	.
Gfa1g001605	.	.	.	.
Gfa1g001606	.	.	.	.
Gfa1g001606	.	.	.	.
Gfa1g001607	Gst1g001388	Gcy1g001346	.	.
Gfa1g001608	Gst1g001390	Gcy1g001347	Gsy1g001384	Gto1g001575
Gfa1g001609	Gst1g001391	Gcy1g001348	Gsy1g001387	Gto1g001576
Gfa1g001610	Gst1g001392	Gcy1g001349	Gsy1g001388	Gto1g001577
Gfa1g001611	Gst1g001393	Gcy1g001351	Gsy1g001390	Gto1g001578
Gfa1g001612	.	Gcy1g001354	Gsy1g001392	Gto1g001579
Gfa1g001613	Gst1g001394	Gcy14g036911	Gsy3g005067	Gto3g005783
Gfa1g001614	Gst1g001397	Gcy1g001360	Gsy1g001394	Gto1g001582
Gfa1g001615	Gst1g001398	Gcy1g001361	Gsy1g001396	Gto1g001584
Gfa1g001616	.	.	.	.
Gfa1g001617	Gst1g001399	Gcy1g001362	Gsy1g001397	Gto1g001587
Gfa1g001618	Gst1g001400	Gcy1g001363	Gsy1g001398	Gto1g001588
Gfa1g001619	Gst1g001403	Gcy1g001368	.	Gto1g001591
Gfa1g001620	Gst9g024185	.	.	.
Gfa1g001621	Gst1g001408	Gcy1g001371	Gsy1g001410	Gto1g001594
Gfa1g001622	Gst1g001410	Gcy1g001372	Gsy1g001411	Gto1g001595
Gfa1g001623	Gst9g024191	Gcy1g001375	Gsy9g024248	Gto15g040805
Gfa1g001624	Gst1g001413	Gcy1g001374	Gsy1g001413	Gto1g001597
Gfa1g001625	Gst9g024193	Gcy9g021757	Gsy9g024251	Gto15g040803
Gfa1g001626	.	.	Gsy1g001415	Gto1g001599
Gfa1g001627	.	.	.	.
Gfa1g001628	Gst1g001415	Gcy1g001380	.	.
Gfa1g001629	Gst9g024195	Gcy9g021758	Gsy9g024253	Gto15g040802
Gfa1g001630	Gst1g001416	Gcy1g001381	Gsy1g001417	Gto1g001600
Gfa1g001631	Gst1g001417	Gcy1g001382	Gsy1g001418	Gto1g001601
Gfa1g001632	.	.	.	Gto15g040799
Gfa1g001633	Gst1g001418	Gcy1g001383	Gsy1g001419	Gto1g001603
Gfa1g001634	.	.	.	.
Gfa1g001635	Gst1g001419	Gcy1g001384	Gsy1g001420	Gto1g001604
Gfa1g001636	Gst1g001421	Gcy1g001388	Gsy1g001422	Gto1g001605
Gfa1g001637	Gst1g001422	Gcy1g001390	Gsy1g001423	Gto15g040794
Gfa1g001638	Gst1g001424	Gcy1g001391	Gsy1g001426	Gto1g001606
Gfa1g001639	Gst1g001425	Gcy1g001392	Gsy1g001428	Gto1g001607
Gfa1g001640	.	Gcy1g001394	.	Gto1g001609
Gfa1g001641	Gst1g001427	Gcy1g001395	.	Gto1g001610
Gfa1g001642	.	.	.	.
Gfa1g001643	Gst1g001428	Gcy1g001397	Gsy1g001431	Gto1g001611
Gfa1g001644	Gst1g001429	Gcy1g001399	Gsy1g001432	Gto1g001614
Gfa1g001645	Gst1g001430	Gcy9g021975	.	.
Gfa1g001646	Gst1g001431	Gcy1g001402	Gsy1g001434	Gto1g001616
Gfa1g001647	Gst13g035888	Gcy13g034047	Gsy13g035706	Gto13g036115
Gfa1g001648	Gst1g001432	Gcy1g001403	Gsy9g024470	Gto1g001618
Gfa1g001649	.	.	.	.
Gfa1g001650	Gst1g001433	Gcy1g001404	Gsy1g001437	Gto1g001620
Gfa1g001651	Gst1g001434	Gcy1g001405	.	.
Gfa1g001652	Gst1g001435	Gcy1g001406	Gsy1g001438	Gto1g001621
Gfa1g001653	Gst9g024395	Gcy9g021983	Gsy9g024475	.
Gfa1g001654	Gst1g001436	Gcy1g001407	Gsy1g001439	Gto1g001623
Gfa1g001655	Gst1g001438	Gcy1g001408	Gsy1g001441	Gto1g001625
Gfa1g001656	Gst1g001439	Gcy1g001409	Gsy1g001442	Gto1g001626
Gfa1g001657	.	Gcy9g021300	.	.
Gfa1g001658	Gst1g001441	Gcy9g021989	Gsy1g001443	Gto1g001627
Gfa1g001659	Gst1g001443	Gcy1g001410	Gsy1g001445	Gto1g001632
Gfa1g001660	Gst1g001445	Gcy1g001411	Gsy1g001451	Gto1g001639
Gfa1g001661	Gst1g001448	Gcy1g001415	Gsy1g001454	Gto1g001640
Gfa1g001662	.	Gcy1g001417	Gsy1g001462	Gto1g001641
Gfa1g001663	.	.	Gsy1g001455	.
Gfa1g001664	Gst1g001449	Gcy1g001418	Gsy1g001457	Gto1g001642
Gfa1g001665	Gst1g001450	Gcy1g001420	Gsy1g001464	Gto1g001643
Gfa1g001666	Gst1g001451	.	Gsy1g001465	Gto1g001644
Gfa1g001667	Gst1g001452	Gcy9g021996	Gsy1g001466	Gto1g001645
Gfa1g001668	Gst1g001455	Gcy1g001422	Gsy1g001467	Gto1g001647
Gfa1g001669	Gst1g001456	Gcy1g001423	Gsy10g028058	Gto7g016805
Gfa1g001670	Gst1g001458	Gcy1g001425	Gsy1g001470	Gto1g001651
Gfa1g001671	Gst1g001459	Gcy1g001426	Gsy1g001471	Gto1g001652
Gfa1g001672	Gst9g024433	Gcy1g001427	Gsy1g001472	Gto1g001653
Gfa1g001673	Gst1g001462	Gcy1g001429	Gsy1g001473	Gto1g001656
Gfa1g001674	Gst1g001464	Gcy1g001430	Gsy1g001475	Gto1g001658
Gfa1g001675	Gst1g001465	Gcy1g001432	Gsy1g001476	Gto1g001660
Gfa1g001676	Gst1g001466	.	.	.
Gfa1g001677	Gst1g001467	Gcy1g001433	.	.
Gfa1g001678	Gst1g001468	Gcy1g001434	Gsy1g001477	Gto1g001662
Gfa1g001679	Gst1g001470	Gcy1g001436	Gsy9g024514	Gto15g040542
Gfa1g001680	Gst1g001471	.	Gsy1g001480	Gto1g001665
Gfa1g001681	Gst1g001472	Gcy1g001437	Gsy1g001482	Gto1g001667
Gfa1g001682	Gst1g001474	Gcy1g001438	Gsy1g001483	Gto1g001668
Gfa1g001683	Gst9g024447	.	.	Gto15g040538
Gfa1g001684	Gst1g001475	Gcy9g022028	Gsy1g001485	Gto1g001669
Gfa1g001685	.	Gcy1g001440	.	Gto1g001671
Gfa1g001686	Gst1g001476	Gcy1g001439	.	Gto1g001670
Gfa1g001687	Gst1g001477	Gcy1g001441	Gsy1g001488	Gto1g001672
Gfa1g001688	.	.	Gsy1g001489	.
Gfa1g001689	Gst1g001479	Gcy1g001442	Gsy1g001491	Gto1g001673
Gfa1g001690	Gst1g001482	Gcy9g022032	Gsy1g001479	Gto1g001676
Gfa1g001691	Gst1g001483	Gcy1g001444	Gsy1g001494	Gto1g001677
Gfa1g001692	Gst1g001484	Gcy1g001445	Gsy1g001495	Gto1g001678
Gfa1g001693	Gst1g001485	Gcy1g001447	Gsy1g001496	Gto1g001679
Gfa1g001694	Gst1g001486	Gcy1g001448	Gsy1g001497	Gto1g001680
Gfa1g001695	Gst1g001488	Gcy1g001449	Gsy1g001498	Gto1g001681
Gfa1g001696	Gst1g001489	Gcy1g001450	Gsy1g001499	Gto1g001682
Gfa1g001697	Gst1g001490	Gcy1g001452	Gsy1g001500	Gto1g001683
Gfa1g001698	Gst1g001491	Gcy1g001453	Gsy1g001501	Gto1g001684
Gfa1g001699	Gst1g001492	Gcy1g001454	Gsy1g001502	Gto1g001685
Gfa1g001700	Gst1g001493	Gcy1g001455	Gsy1g001505	Gto1g001686
Gfa1g001701	Gst1g001494	Gcy1g001457	Gsy1g001506	Gto1g001687
Gfa1g001702	Gst1g001495	Gcy1g001459	Gsy1g001507	Gto1g001688
Gfa1g001703	Gst1g001496	Gcy1g001460	Gsy1g001508	Gto1g001689
Gfa1g001704	Gst1g001497	Gcy1g001461	Gsy1g001509	Gto1g001690
Gfa1g001705	Gst1g001499	Gcy1g001462	Gsy1g001513	Gto1g001691
Gfa1g001706	.	Gcy1g001463	Gsy1g001514	Gto1g001692
Gfa1g001707	Gst1g001500	Gcy1g001464	Gsy1g001515	Gto1g001693
Gfa1g001708	Gst1g001502	Gcy1g001466	Gsy1g001517	Gto1g001694
Gfa1g001709	Gst1g001504	Gcy1g001467	Gsy1g001518	Gto1g001695
Gfa1g001710	Gst1g001505	Gcy1g001468	Gsy1g001519	Gto1g001697
Gfa1g001711	Gst1g001506	.	.	.
Gfa1g001712	Gst11g029264	Gcy7g016617	Gsy16g042566	Gto16g044648
Gfa1g001713	.	.	.	.
Gfa1g001714	Gst1g001507	Gcy1g001469	Gsy1g001524	Gto1g001698
Gfa1g001715	Gst20g055081	Gcy20g055752	.	.
Gfa1g001716	.	Gcy13g033150	.	.
Gfa1g001717	Gst9g024450	Gcy9g022030	Gsy9g024523	Gto15g040534
Gfa1g001718	Gst1g001509	Gcy1g001471	Gsy1g001528	Gto1g001700
Gfa1g001719	Gst1g001510	Gcy1g001472	Gsy1g001529	Gto1g001701
Gfa1g001720	Gst1g001511	Gcy1g001473	Gsy1g001530	Gto1g001702
Gfa1g001721	Gst1g001512	Gcy1g001474	Gsy1g001532	Gto3g006299
Gfa1g001722	.	.	Gsy3g005541	Gto3g006307
Gfa1g001723	Gst1g001513	Gcy1g001475	Gsy1g001536	Gto1g001704
Gfa1g001724	Gst1g001516	Gcy1g001480	Gsy1g001539	Gto1g001711
Gfa1g001725	.	Gcy11g026772	.	.
Gfa1g001726	Gst1g001517	Gcy1g001481	Gsy1g001542	Gto1g001714
Gfa1g001727	.	.	Gsy1g001546	Gto1g001718
Gfa1g001728	Gst1g001521	Gcy1g001492	Gsy1g001548	Gto1g001720
Gfa1g001729	Gst11g029241	.	Gsy1g001549	Gto11g029457
Gfa1g001730	Gst1g001524	Gcy1g001495	Gsy1g001551	Gto1g001723
Gfa1g001731	Gst1g001525	Gcy1g001496	Gsy1g001552	Gto1g001724
Gfa1g001732	Gst1g001527	Gcy1g001501	Gsy1g001553	Gto1g001728
Gfa1g001733	.	.	.	.
Gfa1g001734	Gst1g001528	Gcy1g001502	Gsy1g001554	Gto1g001731
Gfa1g001735	Gst1g001529	Gcy1g001503	Gsy1g001555	Gto1g001732
Gfa1g001736	Gst1g001530	Gcy1g001504	Gsy1g001556	Gto1g001733
Gfa1g001737	.	.	.	Gto11g029450
Gfa1g001738	Gst1g001532	Gcy1g001505	Gsy1g001557	Gto1g001734
Gfa1g001739	.	Gcy1g001506	.	Gto1g001735
Gfa1g001740	Gst1g001534	Gcy1g001507	Gsy1g001562	Gto1g001736
Gfa1g001741	Gst1g001535	Gcy1g001508	Gsy1g001563	Gto1g001737
Gfa1g001742	Gst1g001536	Gcy1g001509	Gsy1g001564	Gto1g001738
Gfa1g001743	.	.	.	.
Gfa1g001744	Gst1g001537	Gcy1g001510	Gsy1g001565	Gto1g001740
Gfa1g001745	Gst1g001538	Gcy1g001511	Gsy1g001566	Gto1g001741
Gfa1g001746	.	.	.	.
Gfa1g001747	Gst1g001541	Gcy1g001512	Gsy1g001599	Gto1g001742
Gfa1g001748	Gst1g001542	Gcy11g026751	.	.
Gfa1g001749	Gst1g001543	Gcy1g001513	Gsy1g001598	Gto1g001743
Gfa1g001750	Gst1g001547	Gcy1g001514	.	.
Gfa1g001751	Gst1g001548	Gcy1g001515	Gsy1g001597	Gto1g001744
Gfa1g001752	Gst16g042558	Gcy11g026747	Gsy11g029187	Gto1g001745
Gfa1g001753	Gst1g001549	Gcy1g001516	Gsy1g001596	.
Gfa1g001754	.	.	.	.
Gfa1g001755	Gst1g001550	Gcy1g001518	Gsy1g001595	Gto1g001746
Gfa1g001756	Gst1g001551	Gcy1g001519	Gsy1g001593	Gto1g001747
Gfa1g001757	Gst1g001552	Gcy1g001520	Gsy1g001592	Gto1g001748
Gfa1g001758	Gst1g001555	Gcy9g021814	Gsy19g050240	Gto1g001749
Gfa1g001759	Gst1g001557	Gcy1g001521	Gsy1g001588	Gto1g001750
Gfa1g001760	Gst1g001560	Gcy1g001523	Gsy1g001586	Gto1g001752
Gfa1g001761	Gst1g001561	.	.	.
Gfa1g001762	Gst1g001562	Gcy11g026737	Gsy1g001585	Gto1g001753
Gfa1g001763	.	.	.	.
Gfa1g001764	Gst1g001563	Gcy1g001524	Gsy1g001584	Gto1g001754
Gfa1g001765	.	.	.	.
Gfa1g001766	Gst1g001564	Gcy1g001525	Gsy11g029173	Gto1g001757
Gfa1g001767	Gst1g001566	.	.	.
Gfa1g001768	Gst1g001565	Gcy1g001527	Gsy1g001581	Gto1g001758
Gfa1g001769	Gst1g001567	.	.	.
Gfa1g001770	Gst2g002608	Gcy5g010305	Gsy15g040052	Gto18g051503
Gfa1g001771	Gst1g001569	Gcy1g001529	Gsy1g001579	Gto1g001760
Gfa1g001772	Gst1g001572	Gcy1g001534	Gsy1g001578	Gto1g001761
Gfa1g001773	Gst1g001573	Gcy1g001532	Gsy1g001577	Gto1g001762
Gfa1g001774	Gst1g001574	Gcy1g001530	Gsy1g001576	Gto1g001764
Gfa1g001775	Gst1g001575	.	Gsy1g001575	.
Gfa1g001776	Gst1g001578	Gcy1g001537	Gsy1g001573	Gto1g001767
Gfa1g001777	Gst1g001579	Gcy1g001539	Gsy1g001571	Gto1g001770
Gfa1g001778	.	.	.	.
Gfa1g001779	Gst1g001581	Gcy1g001541	Gsy1g001569	Gto1g001772
Gfa1g001780	Gst2g002706	Gcy19g050699	Gsy13g033735	Gto2g005479
Gfa1g001781	.	.	.	.
Gfa1g001782	Gst1g001583	Gcy1g001543	Gsy1g001604	Gto1g001786
Gfa1g001783	.	.	.	.
Gfa1g001784	Gst1g001586	Gcy1g001544	Gsy1g001568	Gto1g001773
Gfa1g001785	.	.	.	.
Gfa1g001786	Gst1g001597	Gcy1g001545	Gsy1g001609	Gto1g001788
Gfa1g001787	.	.	.	.
Gfa1g001788	Gst1g001595	Gcy1g001546	Gsy1g001607	Gto1g001779
Gfa1g001789	Gst1g001600	Gcy1g001548	Gsy1g001608	Gto1g001794
Gfa1g001790	Gst11g029193	Gcy11g026709	Gsy11g029152	Gto11g029399
Gfa1g001791	.	.	.	.
Gfa1g001792	Gst1g001599	.	Gsy1g001610	Gto1g001798
Gfa1g001793	Gst1g001598	.	.	Gto1g001780
Gfa1g001794	Gst1g001603	Gcy1g001550	Gsy1g001611	Gto1g001799
Gfa1g001795	Gst1g001604	Gcy11g026706	Gsy1g001613	Gto1g001800
Gfa1g001796	Gst1g001605	Gcy1g001552	Gsy1g001614	Gto1g001802
Gfa1g001797	.	Gcy1g001554	.	.
Gfa1g001798	Gst1g001607	Gcy1g001555	Gsy1g001616	Gto1g001805
Gfa1g001799	Gst1g001608	Gcy1g001557	Gsy1g001618	Gto1g001807
Gfa1g001800	Gst1g001610	Gcy1g001558	Gsy1g001619	Gto1g001808
Gfa1g001801	Gst1g001611	.	.	.
Gfa1g001802	.	.	.	.
Gfa1g001802	.	.	.	.
Gfa1g001803	.	Gcy1g001559	Gsy11g029138	Gto1g001809
Gfa1g001804	Gst1g001612	Gcy1g001560	Gsy1g001620	Gto1g001810
Gfa1g001805	.	.	.	.
Gfa1g001806	Gst11g029172	.	Gsy1g001621	Gto1g001811
Gfa1g001807	Gst1g001616	Gcy1g001561	Gsy1g001623	Gto1g001812
Gfa1g001808	Gst1g001617	.	Gsy1g001624	Gto1g001853
Gfa1g001809	Gst1g001641	Gcy1g001563	Gsy1g001625	Gto1g001852
Gfa1g001810	Gst1g001618	Gcy1g001564	Gsy1g001626	Gto1g001815
Gfa1g001811	Gst1g001619	Gcy1g001565	Gsy1g001627	Gto1g001816
Gfa1g001812	Gst1g001620	Gcy1g001566	Gsy1g001628	Gto1g001817
Gfa1g001813	Gst1g001621	Gcy1g001567	Gsy1g001629	Gto1g001818
Gfa1g001814	Gst1g001622	Gcy1g001568	Gsy1g001630	Gto1g001819
Gfa1g001815	.	Gcy1g001570	.	.
Gfa1g001816	Gst1g001624	Gcy1g001572	Gsy1g001632	.
Gfa1g001817	Gst1g001625	Gcy1g001573	Gsy1g001633	.
Gfa1g001818	Gst1g001627	Gcy1g001575	Gsy1g001634	Gto1g001821
Gfa1g001819	.	.	.	.
Gfa1g001819	.	.	.	.
Gfa1g001820	.	Gcy1g001577	Gsy1g001636	Gto1g001822
Gfa1g001821	Gst1g001628	Gcy1g001578	Gsy1g001637	Gto1g001823
Gfa1g001822	.	.	.	.
Gfa1g001823	Gst1g001630	Gcy1g001580	Gsy1g001640	Gto1g001825
Gfa1g001824	Gst1g001631	Gcy1g001581	Gsy1g001641	Gto1g001826
Gfa1g001825	Gst1g001632	Gcy1g001582	Gsy1g001643	Gto1g001827
Gfa1g001826	Gst1g001635	Gcy1g001585	Gsy1g001651	Gto1g001833
Gfa1g001827	Gst1g001636	Gcy1g001586	Gsy1g001652	Gto1g001834
Gfa1g001828	.	Gcy1g001587	.	.
Gfa1g001829	Gst1g001637	Gcy1g001588	.	.
Gfa1g001830	Gst17g046434	Gcy17g047319	Gsy17g046177	Gto17g048361
Gfa1g001831	Gst1g001638	.	Gsy1g001653	.
Gfa1g001832	.	.	.	.
Gfa1g001833	Gst1g001639	Gcy1g001589	.	.
Gfa1g001834	Gst1g001640	Gcy1g001590	Gsy1g001654	Gto1g001836
Gfa1g001835	Gst1g001648	Gcy1g001595	Gsy1g001658	Gto1g001848
Gfa1g001836	Gst1g001651	Gcy1g001596	.	Gto1g001854
Gfa1g001837	Gst1g001655	Gcy1g001597	Gsy1g001661	Gto1g001855
Gfa1g001838	Gst1g001656	Gcy1g001598	Gsy5g010891	Gto1g001862
Gfa1g001839	.	Gcy1g001599	Gsy1g001662	Gto1g001863
Gfa1g001840	Gst1g001658	Gcy1g001601	Gsy1g001665	Gto1g001865
Gfa1g001841	Gst1g001653	Gcy1g001602	Gsy1g001667	Gto1g001872
Gfa1g001842	Gst11g029139	.	.	.
Gfa1g001843	.	.	.	.
Gfa1g001844	Gst1g001663	Gcy1g001606	Gsy1g001674	Gto1g001876
Gfa1g001845	Gst1g001326	Gcy1g001287	Gsy1g001328	Gto1g001532
Gfa1g001846	.	.	.	.
Gfa1g001847	Gst1g001041	Gcy1g001607	Gsy5g010894	Gto1g001879
Gfa1g001848	Gst1g001665	Gcy16g043956	Gsy1g001676	Gto1g001880
Gfa1g001849	Gst1g001666	Gcy1g001610	Gsy1g001677	.
Gfa1g001850	.	.	.	.
Gfa1g001851	.	.	.	.
Gfa1g001852	Gst1g001668	Gcy1g001612	Gsy1g001678	Gto1g001881
Gfa1g001853	.	.	.	.
Gfa1g001854	Gst1g001671	Gcy1g001614	Gsy1g001679	Gto1g001882
Gfa1g001855	Gst1g001672	.	Gsy1g001680	Gto1g001883
Gfa1g001856	.	.	.	.
Gfa1g001857	Gst1g001673	Gcy1g001615	Gsy1g001681	Gto1g001884
Gfa1g001858	Gst1g001675	Gcy1g001616	Gsy1g001683	Gto1g001885
Gfa1g001859	Gst1g001676	.	.	Gto1g001886
Gfa1g001860	Gst1g001677	Gcy1g001619	Gsy1g001684	Gto1g001887
Gfa1g001861	Gst1g001678	Gcy1g001620	Gsy1g001685	Gto1g001888
Gfa1g001862	Gst1g001679	Gcy1g001621	Gsy1g001686	Gto1g001889
Gfa1g001863	.	.	.	Gto1g001890
Gfa1g001864	Gst1g001680	Gcy1g001622	Gsy1g001687	.
Gfa1g001865	.	.	.	Gto11g029337
Gfa1g001866	Gst1g001681	Gcy1g001623	Gsy1g001688	Gto1g001891
Gfa1g001867	Gst1g001682	Gcy1g001624	Gsy1g001689	Gto1g001892
Gfa1g001868	.	.	.	.
Gfa1g001869	.	.	.	.
Gfa1g001870	.	.	.	.
Gfa1g001871	Gst1g001684	Gcy1g001626	Gsy1g001691	Gto1g001895
Gfa1g001872	Gst1g001683	Gcy11g026645	Gsy1g001692	Gto1g001894
Gfa1g001873	.	Gcy1g001627	.	.
Gfa1g001874	.	.	.	.
Gfa1g001875	.	.	.	.
Gfa1g001876	Gst1g001686	Gcy1g001629	.	Gto1g001899
Gfa1g001877	Gst1g001687	Gcy1g001630	Gsy1g001698	Gto1g001900
Gfa1g001878	Gst1g001688	Gcy1g001631	Gsy1g001699	Gto1g001901
Gfa1g001879	Gst1g001690	Gcy1g001632	Gsy11g029077	Gto11g029326
Gfa1g001880	Gst1g001692	Gcy1g001633	Gsy1g001701	Gto1g001904
Gfa1g001881	Gst1g001693	Gcy1g001634	Gsy1g001702	Gto1g001905
Gfa1g001882	.	.	.	.
Gfa1g001883	Gst1g001694	Gcy1g001636	Gsy1g001704	Gto1g001907
Gfa1g001884	Gst1g001696	.	Gsy1g001705	Gto1g001908
Gfa1g001885	.	.	.	.
Gfa1g001886	Gst1g001699	Gcy1g001637	Gsy1g001707	Gto1g001909
Gfa1g001887	Gst1g001700	Gcy1g001638	Gsy1g001709	Gto1g001911
Gfa1g001888	Gst1g001701	Gcy1g001639	Gsy1g001708	Gto1g001910
Gfa1g001889	Gst1g001702	Gcy1g001640	Gsy1g001710	Gto1g001912
Gfa1g001890	Gst1g001703	Gcy1g001642	Gsy1g001711	.
Gfa1g001891	Gst1g001704	Gcy1g001643	Gsy1g001712	Gto1g001914
Gfa1g001892	Gst1g001705	Gcy1g001644	Gsy1g001713	Gto1g001915
Gfa1g001893	Gst1g001706	Gcy1g001646	Gsy1g001714	Gto1g001916
Gfa1g001894	Gst1g001707	Gcy1g001647	Gsy1g001715	Gto1g001917
Gfa1g001895	Gst1g001709	Gcy1g001648	Gsy1g001716	Gto1g001919
Gfa1g001896	Gst1g001712	Gcy1g001651	Gsy1g001720	Gto1g001922
Gfa1g001897	.	.	.	.
Gfa1g001898	Gst1g001713	Gcy1g001652	Gsy1g001721	Gto1g001923
Gfa1g001899	Gst1g001714	Gcy1g001653	Gsy1g001722	Gto1g001924
Gfa1g001900	Gst1g001717	Gcy11g026610	Gsy1g001723	.
Gfa1g001901	.	.	Gsy1g001724	.
Gfa1g001902	Gst1g001715	.	.	.
Gfa1g001903	Gst1g001716	Gcy1g001654	Gsy1g001725	Gto1g001925
Gfa1g001904	Gst1g001719	Gcy1g001662	.	Gto1g001927
Gfa1g001905	Gst1g001720	Gcy1g001663	Gsy1g001726	Gto1g001929
Gfa1g001906	Gst1g001721	Gcy1g001664	Gsy1g001727	Gto1g001930
Gfa1g001907	Gst1g001722	Gcy1g001665	Gsy1g001728	Gto1g001931
Gfa1g001908	.	.	.	.
Gfa1g001909	Gst1g001723	Gcy1g001666	Gsy1g001729	Gto1g001932
Gfa1g001910	Gst1g001724	Gcy1g001667	Gsy1g001730	Gto1g001933
Gfa1g001911	Gst1g001725	Gcy11g026599	Gsy11g029045	Gto11g029288
Gfa1g001912	.	Gcy1g001670	Gsy1g001733	Gto1g001935
Gfa1g001913	Gst1g001726	Gcy11g026596	Gsy1g001734	Gto1g001936
Gfa1g001914	Gst1g001727	Gcy1g001671	Gsy1g001735	Gto1g001937
Gfa1g001915	Gst1g001728	Gcy1g001672	Gsy1g001736	Gto1g001938
Gfa1g001916	Gst1g001729	Gcy1g001674	Gsy1g001737	Gto1g001940
Gfa1g001917	Gst1g001730	Gcy1g001675	Gsy1g001738	Gto1g001941
Gfa1g001918	Gst1g001731	Gcy1g001676	.	Gto1g001942
Gfa1g001919	Gst1g001732	Gcy1g001677	Gsy1g001739	Gto1g001943
Gfa1g001920	Gst1g001733	Gcy1g001679	Gsy1g001741	Gto1g001944
Gfa1g001921	Gst1g001734	.	.	.
Gfa1g001922	Gst1g001735	Gcy1g001680	Gsy1g001743	Gto1g001946
Gfa1g001923	Gst1g001736	Gcy1g001681	Gsy1g001745	.
Gfa1g001924	Gst1g001737	Gcy11g026587	Gsy1g001746	.
Gfa1g001925	Gst1g001738	Gcy6g012435	Gsy1g001750	.
Gfa1g001926	.	.	.	.
Gfa1g001927	Gst1g001739	Gcy1g001682	Gsy1g001751	Gto1g001947
Gfa1g001928	Gst11g029066	.	Gsy1g001752	Gto1g001948
Gfa1g001929	Gst1g001740	Gcy1g001683	Gsy1g001753	Gto1g001949
Gfa1g001930	Gst1g001742	Gcy1g001685	.	Gto1g001951
Gfa1g001931	Gst1g001741	Gcy1g001684	Gsy1g001754	Gto1g001952
Gfa1g001932	Gst1g001745	Gcy1g001687	.	Gto1g001953
Gfa1g001933	Gst1g001746	Gcy1g001690	Gsy11g029022	Gto1g001955
Gfa1g001934	Gst1g001747	Gcy1g001692	Gsy14g037504	Gto1g001956
Gfa1g001935	Gst1g001749	Gcy1g001693	Gsy1g001759	Gto1g001958
Gfa1g001936	Gst1g001750	Gcy1g001694	Gsy1g001760	Gto1g001959
Gfa1g001937	Gst1g001751	.	.	Gto1g001960
Gfa1g001938	Gst1g001752	Gcy1g001697	.	Gto1g001961
Gfa1g001939	.	.	.	Gto11g029260
Gfa1g001940	Gst1g001754	Gcy1g001698	Gsy1g001761	Gto1g001962
Gfa1g001941	Gst1g001755	Gcy1g001699	Gsy1g001762	Gto1g001963
Gfa1g001942	Gst1g001756	.	Gsy1g001763	Gto1g001964
Gfa1g001943	Gst1g001758	Gcy1g001700	Gsy1g001764	Gto1g001965
Gfa1g001944	Gst1g001759	Gcy1g001701	Gsy1g001765	Gto1g001966
Gfa1g001945	Gst1g001760	Gcy1g001702	Gsy1g001766	Gto1g001967
Gfa1g001946	Gst1g001762	Gcy1g001617	Gsy1g001767	.
Gfa1g001947	Gst1g001763	Gcy1g001703	Gsy1g001768	Gto1g001968
Gfa1g001948	Gst1g001765	Gcy1g001708	Gsy1g001771	Gto1g001971
Gfa1g001949	Gst1g001766	Gcy1g001709	Gsy1g001772	Gto1g001972
Gfa1g001950	Gst1g001767	Gcy1g001710	Gsy1g001774	Gto1g001973
Gfa1g001951	Gst1g001768	Gcy1g001711	Gsy1g001775	Gto1g001975
Gfa1g001952	.	.	.	.
Gfa1g001953	.	.	.	.
Gfa1g001954	Gst2g003729	Gcy19g052496	Gsy2g003635	Gto16g043692
Gfa1g001955	Gst1g001769	Gcy1g001712	Gsy1g001776	Gto1g001976
Gfa1g001956	Gst11g029030	Gcy1g001713	Gsy1g001777	Gto1g001977
Gfa1g001957	.	Gcy1g001714	Gsy1g001778	Gto1g001978
Gfa1g001958	.	.	Gsy1g001779	.
Gfa1g001959	Gst1g001771	Gcy1g001715	Gsy1g001780	Gto1g001979
Gfa1g001960	Gst1g001772	Gcy1g001716	Gsy1g001781	Gto11g029237
Gfa1g001961	Gst1g001775	.	Gsy1g001782	Gto1g001981
Gfa1g001962	Gst1g001776	Gcy1g001718	Gsy1g001783	Gto1g001982
Gfa1g001963	Gst1g001777	Gcy1g001719	Gsy1g001784	Gto1g001984
Gfa1g001964	Gst1g001781	Gcy1g001725	Gsy1g001788	Gto1g001986
Gfa1g001965	.	.	Gsy1g001789	.
Gfa1g001966	Gst1g001783	Gcy1g001727	Gsy1g001790	Gto1g001987
Gfa1g001967	Gst1g001784	Gcy1g001728	Gsy1g001791	Gto1g001988
Gfa1g001968	Gst1g001785	Gcy1g001729	Gsy1g001792	Gto1g001989
Gfa1g001969	Gst11g029015	.	.	.
Gfa1g001970	Gst1g001787	Gcy1g001731	Gsy1g001794	Gto1g001990
Gfa1g001971	Gst1g001788	Gcy1g001732	Gsy1g001796	Gto1g001991
Gfa1g001972	Gst1g001789	Gcy1g001733	Gsy1g001797	Gto1g001992
Gfa1g001973	Gst1g001791	Gcy11g026536	Gsy1g001798	Gto12g031734
Gfa1g001974	Gst1g001792	Gcy1g001734	Gsy1g001799	Gto1g001993
Gfa1g001975	.	.	.	Gto16g044873
Gfa1g001976	.	.	.	.
Gfa1g001977	Gst1g001795	Gcy1g001736	Gsy1g001801	Gto1g001994
Gfa1g001978	Gst1g001796	Gcy1g001737	Gsy1g001803	Gto1g001995
Gfa1g001979	Gst1g001797	Gcy1g001738	Gsy1g001804	Gto1g001996
Gfa1g001980	.	.	Gsy11g028973	Gto1g001997
Gfa1g001981	Gst1g001798	Gcy1g001739	Gsy1g001806	Gto11g029214
Gfa1g001982	Gst1g001799	Gcy1g001741	Gsy1g001807	Gto1g001999
Gfa1g001983	Gst1g001800	Gcy1g001742	Gsy1g001808	Gto1g002000
Gfa1g001984	Gst1g001801	Gcy1g001743	Gsy1g001809	Gto1g002001
Gfa1g001985	Gst1g001803	Gcy1g001745	Gsy1g001811	Gto1g002002
Gfa1g001986	Gst1g001804	Gcy1g001746	Gsy1g001812	Gto1g002003
Gfa1g001987	Gst1g001805	Gcy1g001748	Gsy1g001814	Gto1g002004
Gfa1g001988	Gst1g001806	Gcy1g001749	Gsy1g001815	Gto1g002005
Gfa1g001989	Gst1g001807	Gcy1g001750	Gsy1g001816	Gto1g002007
Gfa1g001990	Gst1g001808	Gcy1g001751	Gsy1g001817	Gto1g002009
Gfa1g001991	Gst1g001809	Gcy1g001752	Gsy1g001818	Gto1g002010
Gfa1g001992	Gst1g001812	Gcy1g001754	Gsy1g001821	Gto1g002011
Gfa1g001993	Gst1g001813	Gcy1g001755	Gsy1g001823	Gto1g002012
[truncated: 107,829 more rows]

## Sheet: Supplementary Table 10
Supplementary Table 10. Shared core genes among 26 annual soybean accessions.
W01	W02	W03	L01	L02	L03	L04	L05	L06	L07	L08	L09	C01	C02	C03	C04	C05	C06	C07	C08	C09	C10	C11	C12	C13	C14
SoyW01_01G000100	SoyW02_01G000100	.	.	.	.	SoyL04_01G000000	.	.	SoyL07_01G000100	SoyL08_01G000100	SoyL09_01G000100	.	.	SoyC03_01G000100	SoyC04_01G000100	.	.	SoyC07_01G000000	.	.	.	.	.	.	SoyC14_01G000100
SoyW01_01G000200	.	SoyW03_01G000100	SoyL01_01G000100	SoyL02_01G000100	SoyL03_01G000100	SoyL04_01G000100	SoyL05_01G000100	SoyL06_01G000100	SoyL07_01G000200	SoyL08_01G000200	SoyL09_01G000200	SoyC01_01G000400	SoyC02_01G000100	SoyC03_01G000200	SoyC04_01G000200	SoyC05_01G000100	SoyC06_01G000100	SoyC07_01G000100	SoyC08_01G000100	SoyC09_01G000100	SoyC10_01G000200	SoyC11_01G000100	SoyC12_01G000100	.	.
SoyW01_01G000300	.	.	.	.	.	.	.	.	SoyL07_01G000300	.	.	.	.	.	.	.	SoyC06_01G000200	.	.	.	.	.	.	.	.
SoyW01_01G000400	.	SoyW03_01G000200	SoyL01_01G000200	SoyL02_01G000200	SoyL03_01G000200	.	SoyL05_01G000200	SoyL06_01G000200	SoyL07_01G000400	SoyL08_01G000300	.	SoyC01_01G000500	.	.	SoyC04_01G000300	SoyC05_01G000200	SoyC06_01G000300	SoyC07_01G000200	.	SoyC09_01G000200	SoyC10_01G000300	.	.	.	SoyC14_01G000200
SoyW01_01G000500	.	.	SoyL01_01G000300	SoyL02_01G000300	.	SoyL04_01G000200	.	SoyL06_01G000300	SoyL07_01G000500	SoyL08_01G000400	SoyL09_01G000300	SoyC01_01G000600	SoyC02_01G000200	SoyC03_01G000300	.	SoyC05_01G000300	SoyC06_01G000400	SoyC07_01G000300	.	SoyC09_01G000300	SoyC10_01G000400	.	.	SoyC13_01G000400	.
SoyW01_01G000600	SoyW02_01G000200	SoyW03_01G000400	.	.	SoyL03_01G000300	SoyL04_01G000300	SoyL05_01G000300	.	SoyL07_01G000600	SoyL08_01G000500	SoyL09_01G000400	.	.	SoyC03_01G000400	SoyC04_01G000400	SoyC05_01G000400	.	.	SoyC08_01G000200	.	.	SoyC11_01G000200	SoyC12_01G000200	.	SoyC14_01G000500
SoyW01_01G000800	SoyW02_01G000500	SoyW03_01G000500	SoyL01_01G000500	SoyL02_01G000500	.	SoyL04_01G000400	SoyL05_01G000500	.	SoyL07_01G000700	SoyL08_01G000600	SoyL09_01G000500	SoyC01_01G000800	SoyC02_01G000400	SoyC03_01G000500	SoyC04_01G000600	SoyC05_01G000500	SoyC06_01G000600	SoyC07_01G000500	SoyC08_01G000400	SoyC09_01G000500	SoyC10_01G000550	SoyC11_01G000400	SoyC12_01G000400	SoyC13_01G000600	SoyC14_01G000600
SoyW01_01G000900	SoyW02_01G000600	SoyW03_01G000600	SoyL01_01G000600	SoyL02_01G000600	SoyL03_01G000500	SoyL04_01G000500	SoyL05_01G000600	SoyL06_01G000500	SoyL07_01G000800	SoyL08_01G000700	SoyL09_01G000600	SoyC01_01G000900	SoyC02_01G000500	SoyC03_01G000600	SoyC04_01G000700	SoyC05_01G000600	SoyC06_01G000700	SoyC07_01G000600	SoyC08_01G000500	SoyC09_01G000600	SoyC10_01G000600	SoyC11_01G000500	SoyC12_01G000500	SoyC13_01G000700	SoyC14_01G000700
SoyW01_01G001000	SoyW02_01G000700	SoyW03_01G000700	SoyL01_01G000700	SoyL02_01G000700	SoyL03_01G000600	SoyL04_01G000600	SoyL05_01G000700	SoyL06_01G000600	SoyL07_01G000900	SoyL08_01G000800	SoyL09_01G000700	SoyC01_01G001000	SoyC02_01G000600	SoyC03_01G000700	SoyC04_01G000800	SoyC05_01G000700	SoyC06_01G000800	SoyC07_01G000700	SoyC08_01G000600	SoyC09_01G000700	SoyC10_01G000700	SoyC11_01G000600	SoyC12_01G000600	SoyC13_01G000800	SoyC14_01G000800
SoyW01_01G001100	SoyW02_01G000800	SoyW03_01G000800	SoyL01_01G000800	SoyL02_01G000800	SoyL03_01G000700	SoyL04_01G000700	SoyL05_01G000800	SoyL06_01G000700	SoyL07_01G001000	SoyL08_01G000900	SoyL09_01G000800	SoyC01_01G001100	SoyC02_01G000700	SoyC03_01G000800	SoyC04_01G000900	SoyC05_01G000800	SoyC06_01G000900	SoyC07_01G000800	SoyC08_01G000700	SoyC09_01G000800	SoyC10_01G000800	SoyC11_01G000700	SoyC12_01G000700	SoyC13_01G000900	SoyC14_01G000900
SoyW01_01G001200	SoyW02_01G001100	SoyW03_01G001100	SoyL01_01G001100	SoyL02_01G001100	SoyL03_01G001000	SoyL04_01G001000	SoyL05_01G001100	SoyL06_01G001000	SoyL07_01G001300	SoyL08_01G001200	SoyL09_01G001100	SoyC01_01G001400	SoyC02_01G001000	SoyC03_01G001100	SoyC04_01G001200	SoyC05_01G001100	SoyC06_01G001200	SoyC07_01G001100	SoyC08_01G001000	SoyC09_01G001100	SoyC10_01G001100	SoyC11_01G001000	SoyC12_01G001000	SoyC13_01G001200	SoyC14_01G001200
SoyW01_01G001300	SoyW02_01G001000	SoyW03_01G001000	SoyL01_01G001000	SoyL02_01G001000	SoyL03_01G000900	SoyL04_01G000900	SoyL05_01G001000	SoyL06_01G000900	SoyL07_01G001200	SoyL08_01G001100	SoyL09_01G001000	SoyC01_01G001300	SoyC02_01G000900	SoyC03_01G001000	SoyC04_01G001100	SoyC05_01G001000	SoyC06_01G001100	SoyC07_01G001000	SoyC08_01G000900	SoyC09_01G001000	SoyC10_01G001000	SoyC11_01G000900	SoyC12_01G000900	SoyC13_01G001100	SoyC14_01G001100
SoyW01_01G001400	SoyW02_01G000900	SoyW03_01G000900	SoyL01_01G000900	SoyL02_01G000900	SoyL03_01G000800	SoyL04_01G000800	SoyL05_01G000900	SoyL06_01G000800	SoyL07_01G001100	SoyL08_01G001000	SoyL09_01G000900	SoyC01_01G001200	SoyC02_01G000800	SoyC03_01G000900	SoyC04_01G001000	SoyC05_01G000900	SoyC06_01G001000	SoyC07_01G000900	SoyC08_01G000800	SoyC09_01G000900	SoyC10_01G000900	SoyC11_01G000800	SoyC12_01G000800	SoyC13_01G001000	SoyC14_01G001000
SoyW01_01G001500	SoyW02_01G001200	SoyW03_01G001200	SoyL01_01G001200	SoyL02_01G001200	SoyL03_01G001100	SoyL04_01G001100	SoyL05_01G001200	SoyL06_01G001100	SoyL07_01G001400	SoyL08_01G001300	SoyL09_01G001200	SoyC01_01G001500	SoyC02_01G001100	SoyC03_01G001200	SoyC04_01G001300	SoyC05_01G001200	SoyC06_01G001300	SoyC07_01G001200	SoyC08_01G001100	SoyC09_01G001200	SoyC10_01G001200	SoyC11_01G001100	SoyC12_01G001100	SoyC13_01G001300	SoyC14_01G001300
SoyW01_01G001600	SoyW02_01G001300	SoyW03_01G001300	SoyL01_01G001300	SoyL02_01G001300	SoyL03_01G001200	SoyL04_01G001200	SoyL05_01G001300	SoyL06_01G001200	SoyL07_01G001500	SoyL08_01G001400	SoyL09_01G001300	SoyC01_01G001600	SoyC02_01G001200	SoyC03_01G001300	SoyC04_01G001400	SoyC05_01G001300	SoyC06_01G001400	SoyC07_01G001300	SoyC08_01G001200	SoyC09_01G001300	SoyC10_01G001300	SoyC11_01G001200	SoyC12_01G001200	SoyC13_01G001400	SoyC14_01G001400
SoyW01_01G001700	SoyW02_01G001400	SoyW03_01G001400	SoyL01_01G001400	SoyL02_01G001400	SoyL03_01G001300	SoyL04_01G001300	SoyL05_01G001400	SoyL06_01G001300	SoyL07_01G001600	SoyL08_01G001500	SoyL09_01G001400	SoyC01_01G001700	SoyC02_01G001300	SoyC03_01G001400	SoyC04_01G001500	SoyC05_01G001400	SoyC06_01G001500	SoyC07_01G001400	SoyC08_01G001300	SoyC09_01G001400	SoyC10_01G001400	SoyC11_01G001300	SoyC12_01G001300	SoyC13_01G001500	.
SoyW01_01G001800	.	SoyW03_01G001500	.	SoyL02_01G001500	SoyL03_01G001400	SoyL04_01G001400	SoyL05_01G001500	SoyL06_01G001400	SoyL07_01G001700	SoyL08_01G001600	SoyL09_01G001500	.	.	SoyC03_01G001500	SoyC04_01G001600	SoyC05_01G001500	.	SoyC07_01G001500	SoyC08_01G001400	SoyC09_01G001500	.	.	.	SoyC13_01G001600	SoyC14_01G001500
SoyW01_01G001900	SoyW02_01G001500	SoyW03_01G001600	SoyL01_01G001500	SoyL02_01G001550	SoyL03_01G001500	SoyL04_01G001500	SoyL05_01G001550	SoyL06_01G001450	SoyL07_01G001800	SoyL08_01G001700	SoyL09_01G001600	SoyC01_01G001800	SoyC02_01G001400	SoyC03_01G001600	SoyC04_01G001700	SoyC05_01G001600	SoyC06_01G001600	SoyC07_01G001600	SoyC08_01G001450	SoyC09_01G001550	SoyC10_01G001500	SoyC11_01G001400	SoyC12_01G001400	SoyC13_01G001700	SoyC14_01G001600
SoyW01_01G002000	SoyW02_01G001600	SoyW03_01G001700	SoyL01_01G001600	SoyL02_01G001600	SoyL03_01G001600	SoyL04_01G001600	SoyL05_01G001600	SoyL06_01G001500	SoyL07_01G001900	SoyL08_01G001800	SoyL09_01G001700	SoyC01_01G001900	SoyC02_01G001500	SoyC03_01G001700	SoyC04_01G001800	SoyC05_01G001700	SoyC06_01G001700	SoyC07_01G001700	SoyC08_01G001500	SoyC09_01G001600	SoyC10_01G001600	SoyC11_01G001500	SoyC12_01G001500	SoyC13_01G001800	SoyC14_01G001700
SoyW01_01G002100	SoyW02_01G001700	SoyW03_01G001800	SoyL01_01G001700	SoyL02_01G001700	SoyL03_01G001700	SoyL04_01G001700	SoyL05_01G001700	SoyL06_01G001600	SoyL07_01G002000	SoyL08_01G001900	SoyL09_01G001800	SoyC01_01G002000	SoyC02_01G001600	SoyC03_01G001800	SoyC04_01G001900	SoyC05_01G001800	SoyC06_01G001800	SoyC07_01G001800	SoyC08_01G001600	SoyC09_01G001700	SoyC10_01G001700	SoyC11_01G001600	SoyC12_01G001600	SoyC13_01G001900	SoyC14_01G001800
SoyW01_01G002200	SoyW02_01G001800	SoyW03_01G001900	SoyL01_01G001800	SoyL02_01G001800	SoyL03_01G001800	SoyL04_01G001800	SoyL05_01G001800	SoyL06_01G001700	SoyL07_01G002100	SoyL08_01G002000	SoyL09_01G001900	SoyC01_01G002100	SoyC02_01G001700	SoyC03_01G001900	SoyC04_01G002000	SoyC05_01G001900	SoyC06_01G001900	SoyC07_01G001900	SoyC08_01G001700	SoyC09_01G001800	SoyC10_01G001800	SoyC11_01G001700	SoyC12_01G001700	SoyC13_01G002000	SoyC14_01G001900
SoyW01_01G002300	SoyW02_01G001900	SoyW03_01G002000	SoyL01_01G001900	SoyL02_01G001900	SoyL03_01G001900	SoyL04_01G001900	SoyL05_01G001900	SoyL06_01G001800	SoyL07_01G002200	SoyL08_01G002100	SoyL09_01G002000	SoyC01_01G002200	SoyC02_01G001800	SoyC03_01G002000	SoyC04_01G002100	SoyC05_01G002000	SoyC06_01G002000	SoyC07_01G002000	SoyC08_01G001800	SoyC09_01G001900	SoyC10_01G001900	SoyC11_01G001800	SoyC12_01G001800	SoyC13_01G002100	SoyC14_01G002000
SoyW01_01G002400	SoyW02_01G002000	SoyW03_01G002100	SoyL01_01G002000	SoyL02_01G002000	SoyL03_01G002000	SoyL04_01G002000	SoyL05_01G002000	SoyL06_01G001900	SoyL07_01G002300	SoyL08_01G002200	SoyL09_01G002100	SoyC01_01G002300	SoyC02_01G001900	SoyC03_01G002100	SoyC04_01G002200	SoyC05_01G002100	SoyC06_01G002100	SoyC07_01G002100	SoyC08_01G001900	SoyC09_01G002000	SoyC10_01G002000	SoyC11_01G001900	SoyC12_01G001900	SoyC13_01G002200	SoyC14_01G002100
SoyW01_01G002500	SoyW02_01G002100	SoyW03_01G002200	SoyL01_01G002100	SoyL02_01G002100	SoyL03_01G002100	SoyL04_01G002100	SoyL05_01G002100	SoyL06_01G002000	SoyL07_01G002400	SoyL08_01G002300	SoyL09_01G002200	SoyC01_01G002400	SoyC02_01G002000	SoyC03_01G002200	SoyC04_01G002300	SoyC05_01G002200	SoyC06_01G002200	SoyC07_01G002200	SoyC08_01G002000	SoyC09_01G002100	SoyC10_01G002100	SoyC11_01G002000	SoyC12_01G002000	SoyC13_01G002300	SoyC14_01G002200
SoyW01_01G002600	SoyW02_01G002200	SoyW03_01G002300	SoyL01_01G002200	SoyL02_01G002200	SoyL03_01G002200	SoyL04_01G002200	SoyL05_01G002200	SoyL06_01G002100	SoyL07_01G002500	SoyL08_01G002400	SoyL09_01G002300	SoyC01_01G002500	SoyC02_01G002100	SoyC03_01G002300	SoyC04_01G002400	SoyC05_01G002300	SoyC06_01G002300	SoyC07_01G002300	SoyC08_01G002100	SoyC09_01G002200	SoyC10_01G002200	SoyC11_01G002100	SoyC12_01G002100	SoyC13_01G002400	SoyC14_01G002300
SoyW01_01G002700	SoyW02_01G002300	SoyW03_01G002400	SoyL01_01G002300	SoyL02_01G002300	SoyL03_01G002300	SoyL04_01G002300	SoyL05_01G002300	SoyL06_01G002200	SoyL07_01G002600	SoyL08_01G002500	SoyL09_01G002400	SoyC01_01G002600	SoyC02_01G002200	SoyC03_01G002400	SoyC04_01G002500	SoyC05_01G002400	SoyC06_01G002400	SoyC07_01G002400	SoyC08_01G002200	SoyC09_01G002300	SoyC10_01G002300	SoyC11_01G002200	SoyC12_01G002200	SoyC13_01G002500	SoyC14_01G002400
SoyW01_01G002800	SoyW02_01G002400	SoyW03_01G002500	SoyL01_01G002400	SoyL02_01G002400	SoyL03_01G002400	SoyL04_01G002400	SoyL05_01G002400	SoyL06_01G002300	SoyL07_01G002700	SoyL08_01G002600	SoyL09_01G002500	SoyC01_01G002700	SoyC02_01G002300	SoyC03_01G002500	SoyC04_01G002600	.	SoyC06_01G002500	SoyC07_01G002500	SoyC08_01G002300	SoyC09_01G002400	SoyC10_01G002400	SoyC11_01G002300	SoyC12_01G002300	SoyC13_01G002600	SoyC14_01G002500
SoyW01_01G002900	SoyW02_01G002500	SoyW03_01G002600	SoyL01_01G002500	SoyL02_01G002500	SoyL03_01G002500	SoyL04_01G002500	SoyL05_01G002500	SoyL06_01G002400	SoyL07_01G002800	SoyL08_01G002700	SoyL09_01G002600	SoyC01_01G002800	SoyC02_01G002400	SoyC03_01G002600	SoyC04_01G002700	SoyC05_01G002600	SoyC06_01G002600	SoyC07_01G002600	SoyC08_01G002400	SoyC09_01G002500	SoyC10_01G002500	SoyC11_01G002400	SoyC12_01G002400	SoyC13_01G002700	SoyC14_01G002600
SoyW01_01G003000	SoyW02_01G002600	SoyW03_01G002700	SoyL01_01G002600	SoyL02_01G002600	SoyL03_01G002600	SoyL04_01G002600	SoyL05_01G002600	SoyL06_01G002500	SoyL07_01G002900	SoyL08_01G002800	SoyL09_01G002700	SoyC01_01G002900	SoyC02_01G002500	SoyC03_01G002700	SoyC04_01G002800	SoyC05_01G002700	SoyC06_01G002700	SoyC07_01G002700	SoyC08_01G002500	SoyC09_01G002600	SoyC10_01G002600	SoyC11_01G002500	SoyC12_01G002500	SoyC13_01G002800	SoyC14_01G002700
SoyW01_01G003100	SoyW02_01G002700	SoyW03_01G002800	SoyL01_01G002700	SoyL02_01G002700	SoyL03_01G002700	SoyL04_01G002700	SoyL05_01G002700	SoyL06_01G002600	SoyL07_01G003000	SoyL08_01G002900	SoyL09_01G002800	SoyC01_01G003000	SoyC02_01G002600	SoyC03_01G002800	SoyC04_01G002900	SoyC05_01G002800	SoyC06_01G002800	SoyC07_01G002800	SoyC08_01G002600	SoyC09_01G002700	SoyC10_01G002700	SoyC11_01G002600	SoyC12_01G002600	SoyC13_01G002900	SoyC14_01G002800
SoyW01_01G003200	SoyW02_01G002800	SoyW03_01G002900	SoyL01_01G002800	SoyL02_01G002800	SoyL03_01G002800	SoyL04_01G002800	SoyL05_01G002800	SoyL06_01G002700	SoyL07_01G003100	SoyL08_01G003000	SoyL09_01G002900	SoyC01_01G003100	SoyC02_01G002700	SoyC03_01G002900	SoyC04_01G003000	SoyC05_01G002900	SoyC06_01G002900	SoyC07_01G002900	SoyC08_01G002700	SoyC09_01G002800	SoyC10_01G002800	SoyC11_01G002700	SoyC12_01G002700	SoyC13_01G003000	SoyC14_01G002900
SoyW01_01G003300	SoyW02_01G002900	SoyW03_01G003000	SoyL01_01G002900	SoyL02_01G002900	SoyL03_01G002900	SoyL04_01G002900	SoyL05_01G002900	SoyL06_01G002800	SoyL07_01G003200	SoyL08_01G003100	SoyL09_01G003000	SoyC01_01G003200	SoyC02_01G002800	SoyC03_01G003000	SoyC04_01G003100	SoyC05_01G003000	SoyC06_01G003000	SoyC07_01G003000	SoyC08_01G002800	SoyC09_01G002900	SoyC10_01G002900	SoyC11_01G002800	SoyC12_01G002800	SoyC13_01G003100	SoyC14_01G003000
SoyW01_01G003400	SoyW02_01G003000	SoyW03_01G003100	SoyL01_01G003000	SoyL02_01G003000	SoyL03_01G003000	SoyL04_01G003000	SoyL05_01G003000	SoyL06_01G002900	SoyL07_01G003300	SoyL08_01G003200	SoyL09_01G003100	SoyC01_01G003300	SoyC02_01G002900	SoyC03_01G003100	SoyC04_01G003200	SoyC05_01G003100	SoyC06_01G003100	SoyC07_01G003100	SoyC08_01G002900	SoyC09_01G003000	SoyC10_01G003000	SoyC11_01G002900	SoyC12_01G002900	SoyC13_01G003200	SoyC14_01G003100
SoyW01_01G003500	SoyW02_01G003100	SoyW03_01G003200	SoyL01_01G003100	SoyL02_01G003100	SoyL03_01G003100	SoyL04_01G003100	SoyL05_01G003100	SoyL06_01G003000	SoyL07_01G003400	SoyL08_01G003300	SoyL09_01G003200	SoyC01_01G003400	SoyC02_01G003000	SoyC03_01G003200	SoyC04_01G003300	SoyC05_01G003200	SoyC06_01G003200	SoyC07_01G003200	SoyC08_01G003000	SoyC09_01G003100	SoyC10_01G003100	SoyC11_01G003000	SoyC12_01G003000	SoyC13_01G003300	SoyC14_01G003200
SoyW01_01G003600	SoyW02_01G003200	SoyW03_01G003300	SoyL01_01G003200	SoyL02_01G003200	SoyL03_01G003200	SoyL04_01G003400	SoyL05_01G003200	SoyL06_01G003100	SoyL07_01G003600	SoyL08_01G003400	SoyL09_01G003400	SoyC01_01G003500	SoyC02_01G003100	SoyC03_01G003300	SoyC04_01G003500	SoyC05_01G003400	SoyC06_01G003300	SoyC07_01G003300	SoyC08_01G003100	SoyC09_01G003200	SoyC10_01G003200	SoyC11_01G003100	SoyC12_01G003100	SoyC13_01G003400	SoyC14_01G003300
SoyW01_01G003700	SoyW02_01G003300	SoyW03_01G003400	SoyL01_01G003300	SoyL02_01G003300	SoyL03_01G003300	SoyL04_01G003500	SoyL05_01G003300	SoyL06_01G003200	SoyL07_01G003700	SoyL08_01G003500	SoyL09_01G003500	SoyC01_01G003600	SoyC02_01G003200	SoyC03_01G003400	SoyC04_01G003600	SoyC05_01G003500	SoyC06_01G003400	SoyC07_01G003400	SoyC08_01G003200	SoyC09_01G003300	SoyC10_01G003300	SoyC11_01G003200	SoyC12_01G003200	SoyC13_01G003500	SoyC14_01G003400
SoyW01_01G003800	SoyW02_01G003400	SoyW03_01G003500	SoyL01_01G003400	SoyL02_01G003400	SoyL03_01G003400	SoyL04_01G003600	SoyL05_01G003400	SoyL06_01G003300	SoyL07_01G003800	SoyL08_01G003600	SoyL09_01G003600	SoyC01_01G003700	SoyC02_01G003300	SoyC03_01G003500	SoyC04_01G003700	SoyC05_01G003600	SoyC06_01G003500	SoyC07_01G003500	SoyC08_01G003300	SoyC09_01G003400	SoyC10_01G003400	SoyC11_01G003300	SoyC12_01G003300	SoyC13_01G003600	SoyC14_01G003500
SoyW01_01G003900	SoyW02_01G003500	SoyW03_01G003600	SoyL01_01G003500	SoyL02_01G003500	SoyL03_01G003500	SoyL04_01G003700	SoyL05_01G003500	SoyL06_01G003400	SoyL07_01G003900	SoyL08_01G003700	SoyL09_01G003700	SoyC01_01G003800	SoyC02_01G003400	SoyC03_01G003600	SoyC04_01G003800	SoyC05_01G003700	SoyC06_01G003600	SoyC07_01G003600	SoyC08_01G003400	SoyC09_01G003500	SoyC10_01G003500	SoyC11_01G003400	SoyC12_01G003400	SoyC13_01G003700	SoyC14_01G003600
SoyW01_01G004000	SoyW02_01G003600	SoyW03_01G003700	SoyL01_01G003600	SoyL02_01G003600	SoyL03_01G003600	SoyL04_01G003800	SoyL05_01G003600	SoyL06_01G003500	SoyL07_01G004000	SoyL08_01G003800	SoyL09_01G003800	SoyC01_01G003900	SoyC02_01G003500	SoyC03_01G003700	SoyC04_01G003900	SoyC05_01G003800	SoyC06_01G003700	SoyC07_01G003700	SoyC08_01G003500	SoyC09_01G003600	SoyC10_01G003600	SoyC11_01G003500	SoyC12_01G003500	SoyC13_01G003800	SoyC14_01G003700
SoyW01_01G004100	SoyW02_01G003700	SoyW03_01G003800	SoyL01_01G003700	SoyL02_01G003700	SoyL03_01G003700	SoyL04_01G003900	SoyL05_01G003700	SoyL06_01G003600	SoyL07_01G004100	SoyL08_01G003900	SoyL09_01G003900	SoyC01_01G004000	SoyC02_01G003600	SoyC03_01G003800	SoyC04_01G004000	SoyC05_01G003900	SoyC06_01G003800	SoyC07_01G003800	SoyC08_01G003600	SoyC09_01G003700	SoyC10_01G003700	SoyC11_01G003600	SoyC12_01G003600	SoyC13_01G003900	SoyC14_01G003800
SoyW01_01G004200	SoyW02_01G003800	SoyW03_01G003900	SoyL01_01G003800	SoyL02_01G003800	SoyL03_01G003800	SoyL04_01G004000	SoyL05_01G003800	SoyL06_01G003700	SoyL07_01G004200	SoyL08_01G004000	SoyL09_01G004000	SoyC01_01G004100	SoyC02_01G003700	SoyC03_01G003900	SoyC04_01G004100	SoyC05_01G004000	SoyC06_01G003900	SoyC07_01G003900	SoyC08_01G003700	SoyC09_01G003800	SoyC10_01G003800	SoyC11_01G003700	SoyC12_01G003700	SoyC13_01G004000	SoyC14_01G003900
SoyW01_01G004300	SoyW02_01G003900	SoyW03_01G004000	SoyL01_01G003900	SoyL02_01G003900	SoyL03_01G003900	SoyL04_01G004100	SoyL05_01G003900	SoyL06_01G003800	SoyL07_01G004300	SoyL08_01G004100	SoyL09_01G004100	SoyC01_01G004200	SoyC02_01G003800	SoyC03_01G004000	SoyC04_01G004200	SoyC05_01G004100	SoyC06_01G004000	SoyC07_01G004000	SoyC08_01G003800	SoyC09_01G003900	SoyC10_01G003900	SoyC11_01G003800	SoyC12_01G003800	SoyC13_01G004100	SoyC14_01G004000
SoyW01_01G004400	SoyW02_01G004000	SoyW03_01G004100	SoyL01_01G004000	SoyL02_01G004000	SoyL03_01G004000	SoyL04_01G004200	SoyL05_01G004000	SoyL06_01G003900	SoyL07_01G004400	SoyL08_01G004200	SoyL09_01G004200	SoyC01_01G004300	SoyC02_01G003900	SoyC03_01G004100	SoyC04_01G004300	SoyC05_01G004200	SoyC06_01G004100	SoyC07_01G004100	SoyC08_01G003900	SoyC09_01G004000	SoyC10_01G004000	SoyC11_01G003900	SoyC12_01G003900	SoyC13_01G004200	SoyC14_01G004100
SoyW01_01G004500	SoyW02_01G004200	SoyW03_01G004300	SoyL01_01G004200	SoyL02_01G004200	SoyL03_01G004100	SoyL04_01G004400	SoyL05_01G004200	SoyL06_01G004100	SoyL07_01G004600	SoyL08_01G004400	SoyL09_01G004400	SoyC01_01G004500	SoyC02_01G004100	SoyC03_01G004300	SoyC04_01G004500	SoyC05_01G004400	SoyC06_01G004300	SoyC07_01G004300	SoyC08_01G004100	SoyC09_01G004200	SoyC10_01G004200	SoyC11_01G004100	SoyC12_01G004100	SoyC13_01G004400	SoyC14_01G004300
SoyW01_01G004600	SoyW02_01G004700	SoyW03_01G004800	SoyL01_01G004800	SoyL02_01G004700	SoyL03_01G004600	SoyL04_01G004900	SoyL05_01G004700	SoyL06_01G004600	SoyL07_01G005100	SoyL08_01G004900	SoyL09_01G004900	SoyC01_01G005000	SoyC02_01G004600	SoyC03_01G004800	SoyC04_01G005000	SoyC05_01G005000	SoyC06_01G004800	SoyC07_01G004800	SoyC08_01G004600	SoyC09_01G004700	SoyC10_01G004700	SoyC11_01G004600	SoyC12_01G004600	SoyC13_01G004900	SoyC14_01G004800
SoyW01_01G004700	SoyW02_01G004400	SoyW03_01G004500	SoyL01_01G004400	SoyL02_01G004400	SoyL03_01G004300	SoyL04_01G004600	SoyL05_01G004400	SoyL06_01G004300	SoyL07_01G004800	SoyL08_01G004600	.	SoyC01_01G004700	SoyC02_01G004300	SoyC03_01G004500	SoyC04_01G004700	SoyC05_01G004600	SoyC06_01G004500	SoyC07_01G004500	SoyC08_01G004300	SoyC09_01G004400	SoyC10_01G004400	SoyC11_01G004300	SoyC12_01G004300	SoyC13_01G004600	SoyC14_01G004500
SoyW01_01G004800	SoyW02_01G004500	SoyW03_01G004600	SoyL01_01G004500	SoyL02_01G004500	SoyL03_01G004400	SoyL04_01G004700	SoyL05_01G004500	SoyL06_01G004400	SoyL07_01G004900	SoyL08_01G004700	SoyL09_01G004700	SoyC01_01G004800	SoyC02_01G004400	SoyC03_01G004600	SoyC04_01G004800	SoyC05_01G004800	SoyC06_01G004600	SoyC07_01G004600	SoyC08_01G004400	SoyC09_01G004500	SoyC10_01G004500	SoyC11_01G004400	SoyC12_01G004400	SoyC13_01G004700	SoyC14_01G004600
SoyW01_01G004900	SoyW02_01G004600	SoyW03_01G004700	SoyL01_01G004600	SoyL02_01G004600	SoyL03_01G004500	SoyL04_01G004800	SoyL05_01G004600	SoyL06_01G004500	SoyL07_01G005000	SoyL08_01G004800	SoyL09_01G004800	SoyC01_01G004900	SoyC02_01G004500	SoyC03_01G004700	SoyC04_01G004900	SoyC05_01G004900	SoyC06_01G004700	SoyC07_01G004700	SoyC08_01G004500	SoyC09_01G004600	SoyC10_01G004600	SoyC11_01G004500	SoyC12_01G004500	SoyC13_01G004800	SoyC14_01G004700
SoyW01_01G005000	SoyW02_01G004300	SoyW03_01G004400	SoyL01_01G004300	SoyL02_01G004300	SoyL03_01G004200	SoyL04_01G004500	SoyL05_01G004300	SoyL06_01G004200	SoyL07_01G004700	SoyL08_01G004500	SoyL09_01G004500	SoyC01_01G004600	SoyC02_01G004200	SoyC03_01G004400	SoyC04_01G004600	SoyC05_01G004500	SoyC06_01G004400	SoyC07_01G004400	SoyC08_01G004200	SoyC09_01G004300	SoyC10_01G004300	SoyC11_01G004200	SoyC12_01G004200	SoyC13_01G004500	SoyC14_01G004400
SoyW01_01G005100	SoyW02_01G004800	SoyW03_01G004900	SoyL01_01G004900	SoyL02_01G004800	SoyL03_01G004700	SoyL04_01G005000	SoyL05_01G004800	SoyL06_01G004700	SoyL07_01G005200	SoyL08_01G005000	SoyL09_01G005000	SoyC01_01G005100	SoyC02_01G004700	SoyC03_01G004900	SoyC04_01G005100	SoyC05_01G005100	SoyC06_01G004900	SoyC07_01G004900	SoyC08_01G004700	SoyC09_01G004800	SoyC10_01G004800	SoyC11_01G004700	SoyC12_01G004700	SoyC13_01G005000	SoyC14_01G004900
SoyW01_01G005200	SoyW02_01G004900	SoyW03_01G005000	SoyL01_01G005000	SoyL02_01G004900	SoyL03_01G004800	SoyL04_01G005100	SoyL05_01G004900	SoyL06_01G004800	SoyL07_01G005300	SoyL08_01G005100	SoyL09_01G005100	SoyC01_01G005200	SoyC02_01G004800	SoyC03_01G005000	SoyC04_01G005200	SoyC05_01G005200	SoyC06_01G005000	SoyC07_01G005000	SoyC08_01G004800	SoyC09_01G004900	SoyC10_01G004900	SoyC11_01G004800	SoyC12_01G004800	SoyC13_01G005100	SoyC14_01G005000
SoyW01_01G005300	SoyW02_01G005000	SoyW03_01G005200	SoyL01_01G005100	SoyL02_01G005000	SoyL03_01G005000	SoyL04_01G005300	SoyL05_01G005000	SoyL06_01G005000	SoyL07_01G005400	SoyL08_01G005200	SoyL09_01G005200	SoyC01_01G005400	SoyC02_01G005000	SoyC03_01G005100	SoyC04_01G005300	SoyC05_01G005300	SoyC06_01G005100	SoyC07_01G005100	SoyC08_01G004900	SoyC09_01G005100	SoyC10_01G005000	SoyC11_01G004900	SoyC12_01G005000	SoyC13_01G005300	SoyC14_01G005200
SoyW01_01G005400	SoyW02_01G005100	SoyW03_01G005300	SoyL01_01G005200	SoyL02_01G005100	SoyL03_01G005100	SoyL04_01G005400	SoyL05_01G005100	SoyL06_01G005100	SoyL07_01G005500	SoyL08_01G005300	SoyL09_01G005300	SoyC01_01G005500	SoyC02_01G005100	SoyC03_01G005200	SoyC04_01G005400	SoyC05_01G005400	SoyC06_01G005200	SoyC07_01G005200	SoyC08_01G005000	SoyC09_01G005200	SoyC10_01G005100	SoyC11_01G005000	SoyC12_01G005100	SoyC13_01G005400	SoyC14_01G005300
SoyW01_01G005500	SoyW02_01G005200	SoyW03_01G005400	SoyL01_01G005300	SoyL02_01G005200	SoyL03_01G005200	SoyL04_01G005500	SoyL05_01G005200	SoyL06_01G005200	SoyL07_01G005600	SoyL08_01G005400	SoyL09_01G005400	SoyC01_01G005600	SoyC02_01G005200	SoyC03_01G005300	SoyC04_01G005500	SoyC05_01G005500	SoyC06_01G005300	SoyC07_01G005300	SoyC08_01G005100	SoyC09_01G005300	SoyC10_01G005200	SoyC11_01G005100	SoyC12_01G005200	SoyC13_01G005500	SoyC14_01G005400
SoyW01_01G005600	SoyW02_01G005300	SoyW03_01G005500	SoyL01_01G005400	SoyL02_01G005300	SoyL03_01G005300	SoyL04_01G005600	SoyL05_01G005300	SoyL06_01G005300	SoyL07_01G005700	SoyL08_01G005500	SoyL09_01G005500	SoyC01_01G005700	SoyC02_01G005300	SoyC03_01G005400	SoyC04_01G005600	SoyC05_01G005600	SoyC06_01G005400	SoyC07_01G005400	SoyC08_01G005200	SoyC09_01G005400	SoyC10_01G005300	SoyC11_01G005200	SoyC12_01G005300	SoyC13_01G005600	SoyC14_01G005500
SoyW01_01G005700	SoyW02_01G005400	SoyW03_01G005600	SoyL01_01G005500	SoyL02_01G005400	SoyL03_01G005400	SoyL04_01G005700	SoyL05_01G005400	SoyL06_01G005400	SoyL07_01G005800	SoyL08_01G005600	SoyL09_01G005600	SoyC01_01G005800	SoyC02_01G005400	SoyC03_01G005500	SoyC04_01G005700	SoyC05_01G005700	SoyC06_01G005500	SoyC07_01G005500	SoyC08_01G005300	SoyC09_01G005500	SoyC10_01G005400	SoyC11_01G005300	SoyC12_01G005400	SoyC13_01G005700	SoyC14_01G005600
SoyW01_01G005800	.	.	.	SoyL02_01G005500	.	.	.	.	.	.	.	.	.	.	.	.	.	.	.	.	.	.	.	.	.
SoyW01_01G005900	SoyW02_01G005500	SoyW03_01G005700	SoyL01_01G005600	.	SoyL03_01G005500	SoyL04_01G005800	SoyL05_01G005500	SoyL06_01G005500	SoyL07_01G005900	SoyL08_01G005700	SoyL09_01G005700	SoyC01_01G005900	SoyC02_01G005500	SoyC03_01G005600	SoyC04_01G005900	SoyC05_01G005900	SoyC06_01G005600	SoyC07_01G005600	SoyC08_01G005400	SoyC09_01G005600	SoyC10_01G005500	SoyC11_01G005400	SoyC12_01G005500	SoyC13_01G005800	SoyC14_01G005700
SoyW01_01G006000	SoyW02_01G005600	SoyW03_01G005800	SoyL01_01G005700	SoyL02_01G005600	SoyL03_01G005600	SoyL04_01G005900	SoyL05_01G005600	SoyL06_01G005600	SoyL07_01G006000	SoyL08_01G005800	SoyL09_01G005800	SoyC01_01G006000	SoyC02_01G005600	SoyC03_01G005700	SoyC04_01G006000	SoyC05_01G006000	SoyC06_01G005700	SoyC07_01G005700	SoyC08_01G005500	SoyC09_01G005700	SoyC10_01G005600	SoyC11_01G005500	SoyC12_01G005600	SoyC13_01G005900	SoyC14_01G005800
SoyW01_01G006100	SoyW02_01G005700	SoyW03_01G005900	SoyL01_01G005800	SoyL02_01G005700	SoyL03_01G005700	SoyL04_01G006000	SoyL05_01G005700	SoyL06_01G005700	SoyL07_01G006100	SoyL08_01G005900	SoyL09_01G005900	SoyC01_01G006100	SoyC02_01G005700	SoyC03_01G005800	SoyC04_01G006100	SoyC05_01G006100	SoyC06_01G005800	SoyC07_01G005800	SoyC08_01G005600	SoyC09_01G005800	SoyC10_01G005700	SoyC11_01G005600	SoyC12_01G005700	SoyC13_01G006000	SoyC14_01G005900
SoyW01_01G006200	SoyW02_01G005800	SoyW03_01G006000	SoyL01_01G005900	SoyL02_01G005800	SoyL03_01G005800	SoyL04_01G006100	SoyL05_01G005800	SoyL06_01G005800	SoyL07_01G006200	SoyL08_01G006000	SoyL09_01G006000	SoyC01_01G006200	SoyC02_01G005800	SoyC03_01G005900	SoyC04_01G006200	SoyC05_01G006300	SoyC06_01G005900	SoyC07_01G005900	SoyC08_01G005700	SoyC09_01G005900	SoyC10_01G005800	SoyC11_01G005700	SoyC12_01G005800	SoyC13_01G006100	SoyC14_01G006000
SoyW01_01G006300	SoyW02_01G005900	SoyW03_01G006100	SoyL01_01G006000	SoyL02_01G005900	SoyL03_01G005900	SoyL04_01G006200	SoyL05_01G005900	SoyL06_01G005900	SoyL07_01G006300	SoyL08_01G006100	SoyL09_01G006100	SoyC01_01G006300	SoyC02_01G005900	SoyC03_01G006000	SoyC04_01G006300	SoyC05_01G006400	SoyC06_01G006000	SoyC07_01G006000	SoyC08_01G005800	SoyC09_01G006000	SoyC10_01G005900	SoyC11_01G005800	SoyC12_01G005900	SoyC13_01G006200	SoyC14_01G006100
SoyW01_01G006400	.	SoyW03_01G006400	.	.	.	.	.	.	.	SoyL08_01G006400	.	.	.	.	SoyC04_01G006600	.	.	.	.	.	.	.	.	SoyC13_01G006500	.
SoyW01_01G006500	SoyW02_01G006200	SoyW03_01G006200	SoyL01_01G006300	SoyL02_01G006200	SoyL03_01G006200	SoyL04_01G006500	SoyL05_01G006200	SoyL06_01G006200	SoyL07_01G006600	SoyL08_01G006200	SoyL09_01G006500	SoyC01_01G006600	SoyC02_01G006200	SoyC03_01G006300	SoyC04_01G006400	SoyC05_01G006700	SoyC06_01G006300	SoyC07_01G006300	SoyC08_01G006100	SoyC09_01G006300	SoyC10_01G006200	SoyC11_01G006100	SoyC12_01G006200	SoyC13_01G006300	SoyC14_01G006400
SoyW01_01G006600	SoyW02_01G006100	SoyW03_01G006300	SoyL01_01G006200	SoyL02_01G006100	SoyL03_01G006100	SoyL04_01G006400	SoyL05_01G006100	SoyL06_01G006100	SoyL07_01G006500	SoyL08_01G006300	SoyL09_01G006400	SoyC01_01G006500	SoyC02_01G006100	SoyC03_01G006200	SoyC04_01G006500	SoyC05_01G006600	SoyC06_01G006200	SoyC07_01G006200	SoyC08_01G006000	SoyC09_01G006200	SoyC10_01G006100	SoyC11_01G006000	SoyC12_01G006100	SoyC13_01G006400	SoyC14_01G006300
SoyW01_01G006700	SoyW02_01G006000	.	SoyL01_01G006100	SoyL02_01G006000	SoyL03_01G006000	SoyL04_01G006300	SoyL05_01G006000	SoyL06_01G006000	SoyL07_01G006400	.	SoyL09_01G006300	SoyC01_01G006400	SoyC02_01G006000	SoyC03_01G006100	.	SoyC05_01G006500	SoyC06_01G006100	SoyC07_01G006100	SoyC08_01G005900	SoyC09_01G006100	SoyC10_01G006000	SoyC11_01G005900	SoyC12_01G006000	.	SoyC14_01G006200
SoyW01_01G006800	SoyW02_01G006300	SoyW03_01G006500	SoyL01_01G006400	SoyL02_01G006300	SoyL03_01G006300	SoyL04_01G006600	SoyL05_01G006300	SoyL06_01G006300	SoyL07_01G006700	SoyL08_01G006500	SoyL09_01G006600	SoyC01_01G006700	SoyC02_01G006300	SoyC03_01G006400	SoyC04_01G006700	SoyC05_01G006800	SoyC06_01G006400	SoyC07_01G006400	SoyC08_01G006200	SoyC09_01G006400	SoyC10_01G006300	SoyC11_01G006200	SoyC12_01G006300	SoyC13_01G006600	SoyC14_01G006500
SoyW01_01G006900	SoyW02_01G006400	SoyW03_01G006600	SoyL01_01G006500	SoyL02_01G006400	SoyL03_01G006400	SoyL04_01G006700	SoyL05_01G006400	SoyL06_01G006400	SoyL07_01G006800	SoyL08_01G006600	SoyL09_01G006700	SoyC01_01G006800	SoyC02_01G006400	SoyC03_01G006500	SoyC04_01G006900	SoyC05_01G006900	SoyC06_01G006500	SoyC07_01G006500	SoyC08_01G006300	SoyC09_01G006500	SoyC10_01G006400	SoyC11_01G006300	SoyC12_01G006400	SoyC13_01G006700	SoyC14_01G006600
SoyW01_01G007000	SoyW02_01G006500	SoyW03_01G006700	SoyL01_01G006600	SoyL02_01G006500	SoyL03_01G006500	SoyL04_01G006800	SoyL05_01G006500	SoyL06_01G006500	SoyL07_01G006900	SoyL08_01G006700	SoyL09_01G006800	SoyC01_01G006900	SoyC02_01G006500	SoyC03_01G006600	SoyC04_01G007000	SoyC05_01G007000	SoyC06_01G006600	SoyC07_01G006600	SoyC08_01G006400	SoyC09_01G006600	SoyC10_01G006500	SoyC11_01G006400	SoyC12_01G006500	SoyC13_01G006800	SoyC14_01G006700
SoyW01_01G007100	SoyW02_01G006600	SoyW03_01G006800	SoyL01_01G006700	SoyL02_01G006600	SoyL03_01G006600	SoyL04_01G006900	SoyL05_01G006600	SoyL06_01G006600	SoyL07_01G007000	SoyL08_01G006800	SoyL09_01G006900	SoyC01_01G007000	SoyC02_01G006600	SoyC03_01G006700	SoyC04_01G007100	SoyC05_01G007100	SoyC06_01G006700	SoyC07_01G006700	SoyC08_01G006500	SoyC09_01G006700	SoyC10_01G006600	SoyC11_01G006500	SoyC12_01G006600	SoyC13_01G006900	SoyC14_01G006800
SoyW01_01G007200	SoyW02_01G006700	SoyW03_01G006900	SoyL01_01G006800	SoyL02_01G006700	SoyL03_01G006700	SoyL04_01G007000	SoyL05_01G006700	SoyL06_01G006700	SoyL07_01G007100	SoyL08_01G006900	SoyL09_01G007000	SoyC01_01G007100	SoyC02_01G006700	SoyC03_01G006800	SoyC04_01G007200	SoyC05_01G007200	SoyC06_01G006800	SoyC07_01G006800	SoyC08_01G006600	SoyC09_01G006800	SoyC10_01G006700	SoyC11_01G006600	SoyC12_01G006700	SoyC13_01G007000	SoyC14_01G006900
SoyW01_01G007300	SoyW02_01G006800	SoyW03_01G007000	SoyL01_01G006900	SoyL02_01G006800	SoyL03_01G006800	SoyL04_01G007100	SoyL05_01G006800	SoyL06_01G006800	SoyL07_01G007200	SoyL08_01G007000	SoyL09_01G007100	SoyC01_01G007200	SoyC02_01G006800	SoyC03_01G006900	SoyC04_01G007300	SoyC05_01G007300	SoyC06_01G006900	SoyC07_01G006900	SoyC08_01G006700	SoyC09_01G006900	SoyC10_01G006800	SoyC11_01G006700	SoyC12_01G006800	SoyC13_01G007100	SoyC14_01G007000
SoyW01_01G007400	SoyW02_01G006900	SoyW03_01G007100	SoyL01_01G007000	SoyL02_01G006900	SoyL03_01G006900	SoyL04_01G007200	SoyL05_01G006900	SoyL06_01G006900	SoyL07_01G007300	SoyL08_01G007100	SoyL09_01G007200	SoyC01_01G007300	SoyC02_01G006900	SoyC03_01G007000	SoyC04_01G007400	SoyC05_01G007400	SoyC06_01G007000	SoyC07_01G007000	SoyC08_01G006800	SoyC09_01G007100	SoyC10_01G006900	SoyC11_01G006800	SoyC12_01G006900	SoyC13_01G007200	.
SoyW01_01G007500	SoyW02_01G007000	SoyW03_01G007200	SoyL01_01G007100	SoyL02_01G007000	SoyL03_01G007000	SoyL04_01G007300	SoyL05_01G007000	SoyL06_01G007000	SoyL07_01G007400	SoyL08_01G007200	SoyL09_01G007300	SoyC01_01G007400	SoyC02_01G007000	SoyC03_01G007200	SoyC04_01G007500	SoyC05_01G007500	SoyC06_01G007200	SoyC07_01G007100	SoyC08_01G006900	SoyC09_01G007200	SoyC10_01G007000	SoyC11_01G006900	SoyC12_01G007100	SoyC13_01G007300	SoyC14_01G007200
SoyW01_01G007600	SoyW02_01G007100	SoyW03_01G007500	SoyL01_01G007200	SoyL02_01G007100	SoyL03_01G007100	SoyL04_01G007600	SoyL05_01G007100	SoyL06_01G007100	SoyL07_01G007600	SoyL08_01G007400	SoyL09_01G007500	SoyC01_01G007500	SoyC02_01G007100	SoyC03_01G007400	SoyC04_01G007700	SoyC05_01G007700	SoyC06_01G007300	SoyC07_01G007200	SoyC08_01G007000	SoyC09_01G007300	SoyC10_01G007100	SoyC11_01G007000	.	SoyC13_01G007500	SoyC14_01G007300
SoyW01_01G007700	.	SoyW03_01G007400	.	.	.	SoyL04_01G007500	.	.	SoyL07_01G007500	SoyL08_01G007300	SoyL09_01G007400	.	.	SoyC03_01G007300	SoyC04_01G007600	SoyC05_01G007600	.	.	.	.	.	.	SoyC12_01G007200	SoyC13_01G007400	.
SoyW01_01G007800	SoyW02_01G007200	SoyW03_01G007600	SoyL01_01G007300	SoyL02_01G007200	SoyL03_01G007200	SoyL04_01G007700	SoyL05_01G007200	SoyL06_01G007200	SoyL07_01G007700	SoyL08_01G007500	SoyL09_01G007600	SoyC01_01G007600	SoyC02_01G007200	SoyC03_01G007500	SoyC04_01G007800	SoyC05_01G007800	SoyC06_01G007500	SoyC07_01G007300	SoyC08_01G007200	SoyC09_01G007400	SoyC10_01G007200	SoyC11_01G007100	SoyC12_01G007300	SoyC13_01G007600	SoyC14_01G007400
SoyW01_01G007900	SoyW02_01G007300	SoyW03_01G007700	SoyL01_01G007400	SoyL02_01G007300	SoyL03_01G007300	SoyL04_01G007800	SoyL05_01G007300	SoyL06_01G007300	SoyL07_01G007800	SoyL08_01G007600	SoyL09_01G007700	SoyC01_01G007700	SoyC02_01G007300	SoyC03_01G007600	SoyC04_01G007900	SoyC05_01G007900	SoyC06_01G007600	SoyC07_01G007400	SoyC08_01G007300	SoyC09_01G007500	SoyC10_01G007300	SoyC11_01G007200	SoyC12_01G007400	SoyC13_01G007700	SoyC14_01G007500
SoyW01_01G008000	SoyW02_01G007400	SoyW03_01G007800	SoyL01_01G007500	SoyL02_01G007400	SoyL03_01G007400	SoyL04_01G007900	SoyL05_01G007400	SoyL06_01G007400	SoyL07_01G007900	SoyL08_01G007700	SoyL09_01G007800	SoyC01_01G007800	SoyC02_01G007400	SoyC03_01G007700	SoyC04_01G008000	SoyC05_01G008000	SoyC06_01G007700	SoyC07_01G007500	SoyC08_01G007400	SoyC09_01G007600	SoyC10_01G007400	SoyC11_01G007300	SoyC12_01G007500	SoyC13_01G007800	SoyC14_01G007600
SoyW01_01G008100	SoyW02_01G007500	SoyW03_01G007900	SoyL01_01G007600	SoyL02_01G007500	SoyL03_01G007500	SoyL04_01G008000	SoyL05_01G007500	SoyL06_01G007500	SoyL07_01G008000	SoyL08_01G007800	SoyL09_01G007900	SoyC01_01G007900	SoyC02_01G007500	SoyC03_01G007800	SoyC04_01G008100	SoyC05_01G008100	SoyC06_01G007800	SoyC07_01G007600	SoyC08_01G007500	SoyC09_01G007700	SoyC10_01G007500	SoyC11_01G007400	SoyC12_01G007600	SoyC13_01G007900	SoyC14_01G007700
SoyW01_01G008200	SoyW02_01G007600	SoyW03_01G008000	SoyL01_01G007700	SoyL02_01G007600	SoyL03_01G007600	SoyL04_01G008100	SoyL05_01G007600	SoyL06_01G007600	SoyL07_01G008100	SoyL08_01G007900	SoyL09_01G008000	SoyC01_01G008000	SoyC02_01G007600	SoyC03_01G007900	SoyC04_01G008200	SoyC05_01G008200	SoyC06_01G007900	SoyC07_01G007700	SoyC08_01G007600	SoyC09_01G007800	SoyC10_01G007600	SoyC11_01G007500	SoyC12_01G007700	SoyC13_01G008000	SoyC14_01G007800
SoyW01_01G008300	SoyW02_01G007700	SoyW03_01G008100	SoyL01_01G007800	SoyL02_01G007700	SoyL03_01G007700	SoyL04_01G008200	SoyL05_01G007700	SoyL06_01G007700	SoyL07_01G008200	SoyL08_01G008000	SoyL09_01G008100	SoyC01_01G008100	SoyC02_01G007700	SoyC03_01G008000	SoyC04_01G008300	SoyC05_01G008300	SoyC06_01G008000	SoyC07_01G007800	SoyC08_01G007700	SoyC09_01G007900	SoyC10_01G007700	SoyC11_01G007600	SoyC12_01G007800	SoyC13_01G008100	.
SoyW01_01G008400	SoyW02_01G007900	SoyW03_01G008200	SoyL01_01G007900	SoyL02_01G007800	SoyL03_01G007800	SoyL04_01G008300	SoyL05_01G007800	SoyL06_01G007900	.	SoyL08_01G008100	SoyL09_01G008200	SoyC01_01G008200	SoyC02_01G007800	SoyC03_01G008100	SoyC04_01G008400	SoyC05_01G008400	SoyC06_01G008100	SoyC07_01G007900	SoyC08_01G007800	SoyC09_01G008000	SoyC10_01G007800	SoyC11_01G007700	SoyC12_01G007900	SoyC13_01G008300	SoyC14_01G008000
SoyW01_01G008500	SoyW02_01G008000	SoyW03_01G008300	SoyL01_01G008000	SoyL02_01G007900	SoyL03_01G007900	SoyL04_01G008400	SoyL05_01G007900	SoyL06_01G008000	SoyL07_01G008300	SoyL08_01G008200	SoyL09_01G008300	SoyC01_01G008300	SoyC02_01G007900	SoyC03_01G008200	SoyC04_01G008500	SoyC05_01G008500	SoyC06_01G008200	SoyC07_01G008000	SoyC08_01G007900	SoyC09_01G008100	SoyC10_01G007900	SoyC11_01G007800	SoyC12_01G008000	SoyC13_01G008400	SoyC14_01G008100
SoyW01_01G008600	SoyW02_01G008100	SoyW03_01G008400	SoyL01_01G008100	SoyL02_01G008000	SoyL03_01G008000	SoyL04_01G008500	SoyL05_01G008000	SoyL06_01G008100	SoyL07_01G008400	SoyL08_01G008300	SoyL09_01G008400	SoyC01_01G008400	SoyC02_01G008000	SoyC03_01G008300	SoyC04_01G008600	SoyC05_01G008600	SoyC06_01G008300	SoyC07_01G008100	SoyC08_01G008000	SoyC09_01G008200	SoyC10_01G008000	SoyC11_01G007900	SoyC12_01G008100	SoyC13_01G008500	SoyC14_01G008200
SoyW01_01G008700	SoyW02_01G008200	SoyW03_01G008500	SoyL01_01G008200	SoyL02_01G008100	SoyL03_01G008100	SoyL04_01G008600	SoyL05_01G008100	SoyL06_01G008200	SoyL07_01G008500	SoyL08_01G008400	SoyL09_01G008500	SoyC01_01G008500	SoyC02_01G008100	SoyC03_01G008400	SoyC04_01G008700	SoyC05_01G008700	SoyC06_01G008400	SoyC07_01G008200	SoyC08_01G008100	SoyC09_01G008300	SoyC10_01G008100	SoyC11_01G008000	SoyC12_01G008200	SoyC13_01G008600	SoyC14_01G008300
SoyW01_01G008800	SoyW02_01G008300	SoyW03_01G008600	SoyL01_01G008300	SoyL02_01G008200	SoyL03_01G008200	SoyL04_01G008700	SoyL05_01G008200	SoyL06_01G008300	SoyL07_01G008600	SoyL08_01G008500	SoyL09_01G008600	SoyC01_01G008600	SoyC02_01G008200	SoyC03_01G008500	SoyC04_01G008800	SoyC05_01G008800	SoyC06_01G008500	SoyC07_01G008300	SoyC08_01G008200	SoyC09_01G008400	SoyC10_01G008200	SoyC11_01G008100	SoyC12_01G008300	SoyC13_01G008700	SoyC14_01G008400
SoyW01_01G008900	SoyW02_01G008400	SoyW03_01G008700	SoyL01_01G008400	SoyL02_01G008300	SoyL03_01G008300	SoyL04_01G008800	SoyL05_01G008300	SoyL06_01G008400	SoyL07_01G008700	SoyL08_01G008600	SoyL09_01G008700	SoyC01_01G008700	SoyC02_01G008300	SoyC03_01G008600	SoyC04_01G008900	SoyC05_01G008900	SoyC06_01G008600	SoyC07_01G008400	SoyC08_01G008300	SoyC09_01G008500	SoyC10_01G008300	SoyC11_01G008200	SoyC12_01G008400	SoyC13_01G008800	SoyC14_01G008500
SoyW01_01G009000	SoyW02_01G008500	SoyW03_01G008800	SoyL01_01G008500	SoyL02_01G008400	SoyL03_01G008400	SoyL04_01G008900	SoyL05_01G008400	SoyL06_01G008500	SoyL07_01G008800	SoyL08_01G008700	SoyL09_01G008800	SoyC01_01G008800	SoyC02_01G008400	SoyC03_01G008700	SoyC04_01G009000	SoyC05_01G009000	SoyC06_01G008700	SoyC07_01G008500	SoyC08_01G008400	SoyC09_01G008600	SoyC10_01G008400	SoyC11_01G008300	SoyC12_01G008500	SoyC13_01G008900	SoyC14_01G008600
SoyW01_01G009100	SoyW02_01G008600	SoyW03_01G008900	SoyL01_01G008600	SoyL02_01G008500	SoyL03_01G008500	SoyL04_01G009000	SoyL05_01G008500	SoyL06_01G008600	SoyL07_01G008900	SoyL08_01G008800	SoyL09_01G008900	SoyC01_01G008900	SoyC02_01G008500	SoyC03_01G008800	SoyC04_01G009100	SoyC05_01G009100	SoyC06_01G008800	SoyC07_01G008600	SoyC08_01G008500	SoyC09_01G008700	SoyC10_01G008500	SoyC11_01G008400	SoyC12_01G008600	SoyC13_01G009000	SoyC14_01G008700
SoyW01_01G009200	SoyW02_01G008700	SoyW03_01G009000	.	SoyL02_01G008600	SoyL03_01G008600	SoyL04_01G009100	SoyL05_01G008600	SoyL06_01G008700	SoyL07_01G009000	SoyL08_01G008900	SoyL09_01G009000	SoyC01_01G009000	SoyC02_01G008600	SoyC03_01G008900	SoyC04_01G009200	SoyC05_01G009200	SoyC06_01G008900	SoyC07_01G008700	SoyC08_01G008600	SoyC09_01G008800	SoyC10_01G008600	SoyC11_01G008500	SoyC12_01G008700	SoyC13_01G009100	SoyC14_01G008800
SoyW01_01G009300	.	SoyW03_01G009100	SoyL01_01G008800	SoyL02_01G008700	SoyL03_01G008700	SoyL04_01G009200	SoyL05_01G008700	SoyL06_01G008800	SoyL07_01G009100	SoyL08_01G009000	SoyL09_01G009100	SoyC01_01G009100	SoyC02_01G008700	SoyC03_01G009000	SoyC04_01G009300	SoyC05_01G009300	SoyC06_01G009000	SoyC07_01G008800	SoyC08_01G008700	SoyC09_01G008900	SoyC10_01G008700	SoyC11_01G008600	SoyC12_01G008800	SoyC13_01G009200	SoyC14_01G008900
SoyW01_01G009400	SoyW02_01G008800	.	SoyL01_01G008700	SoyL02_01G008800	SoyL03_01G008800	.	.	.	SoyL07_01G009200	.	.	.	.	.	.	SoyC05_01G009400	.	.	SoyC08_01G008800	SoyC09_01G009000	SoyC10_01G008800	.	SoyC12_01G008900	.	SoyC14_01G009000
SoyW01_01G009500	SoyW02_01G008900	SoyW03_01G009200	SoyL01_01G008900	SoyL02_01G008900	SoyL03_01G008900	SoyL04_01G009400	SoyL05_01G008800	SoyL06_01G008900	SoyL07_01G009300	SoyL08_01G009100	SoyL09_01G009200	SoyC01_01G009200	SoyC02_01G008800	SoyC03_01G009100	SoyC04_01G009400	SoyC05_01G009500	SoyC06_01G009100	SoyC07_01G008900	SoyC08_01G008900	SoyC09_01G009100	SoyC10_01G008900	SoyC11_01G008700	SoyC12_01G009000	SoyC13_01G009300	SoyC14_01G009100
SoyW01_01G009600	SoyW02_01G009000	SoyW03_01G009300	SoyL01_01G009000	SoyL02_01G009000	SoyL03_01G009000	SoyL04_01G009500	SoyL05_01G008900	SoyL06_01G009000	SoyL07_01G009400	SoyL08_01G009200	SoyL09_01G009300	SoyC01_01G009300	SoyC02_01G008900	SoyC03_01G009200	SoyC04_01G009500	SoyC05_01G009600	SoyC06_01G009200	SoyC07_01G009000	SoyC08_01G009000	SoyC09_01G009200	SoyC10_01G009000	SoyC11_01G008800	SoyC12_01G009100	SoyC13_01G009400	SoyC14_01G009200
SoyW01_01G009700	SoyW02_01G009100	SoyW03_01G009400	SoyL01_01G009100	SoyL02_01G009100	SoyL03_01G009100	SoyL04_01G009600	SoyL05_01G009000	SoyL06_01G009100	SoyL07_01G009500	SoyL08_01G009300	SoyL09_01G009400	SoyC01_01G009400	SoyC02_01G009000	SoyC03_01G009300	SoyC04_01G009600	SoyC05_01G009700	SoyC06_01G009300	SoyC07_01G009100	SoyC08_01G009100	SoyC09_01G009300	SoyC10_01G009100	SoyC11_01G008900	SoyC12_01G009200	SoyC13_01G009500	SoyC14_01G009300
SoyW01_01G009800	SoyW02_01G009200	SoyW03_01G009500	SoyL01_01G009200	SoyL02_01G009200	SoyL03_01G009200	SoyL04_01G009700	SoyL05_01G009100	SoyL06_01G009200	SoyL07_01G009600	SoyL08_01G009400	SoyL09_01G009500	SoyC01_01G009500	SoyC02_01G009100	SoyC03_01G009400	SoyC04_01G009700	SoyC05_01G009800	SoyC06_01G009400	SoyC07_01G009200	SoyC08_01G009200	SoyC09_01G009400	SoyC10_01G009200	SoyC11_01G009000	SoyC12_01G009300	SoyC13_01G009600	SoyC14_01G009400
SoyW01_01G009900	SoyW02_01G009300	SoyW03_01G009600	SoyL01_01G009300	SoyL02_01G009300	SoyL03_01G009300	SoyL04_01G009800	SoyL05_01G009200	SoyL06_01G009300	SoyL07_01G009700	SoyL08_01G009500	SoyL09_01G009600	SoyC01_01G009600	SoyC02_01G009200	SoyC03_01G009500	SoyC04_01G009800	SoyC05_01G009900	SoyC06_01G009500	SoyC07_01G009300	SoyC08_01G009300	SoyC09_01G009500	SoyC10_01G009300	SoyC11_01G009100	SoyC12_01G009400	SoyC13_01G009700	SoyC14_01G009500
SoyW01_01G010000	SoyW02_01G009400	SoyW03_01G009700	SoyL01_01G009400	SoyL02_01G009400	SoyL03_01G009400	SoyL04_01G009900	SoyL05_01G009300	SoyL06_01G009400	SoyL07_01G009800	SoyL08_01G009600	SoyL09_01G009700	SoyC01_01G009700	SoyC02_01G009300	SoyC03_01G009600	SoyC04_01G009900	SoyC05_01G010000	SoyC06_01G009600	SoyC07_01G009400	SoyC08_01G009400	SoyC09_01G009600	SoyC10_01G009400	SoyC11_01G009200	SoyC12_01G009500	SoyC13_01G009800	SoyC14_01G009600
SoyW01_01G010100	SoyW02_01G009500	SoyW03_01G009800	SoyL01_01G009500	SoyL02_01G009500	SoyL03_01G009500	SoyL04_01G010000	SoyL05_01G009400	SoyL06_01G009500	SoyL07_01G009900	SoyL08_01G009700	SoyL09_01G009800	SoyC01_01G009800	SoyC02_01G009400	SoyC03_01G009700	SoyC04_01G010000	SoyC05_01G010100	SoyC06_01G009700	SoyC07_01G009500	SoyC08_01G009500	SoyC09_01G009700	SoyC10_01G009500	SoyC11_01G009300	SoyC12_01G009600	SoyC13_01G009900	SoyC14_01G009700
SoyW01_01G010200	SoyW02_01G009600	SoyW03_01G009900	SoyL01_01G009600	SoyL02_01G009600	SoyL03_01G009600	SoyL04_01G010100	SoyL05_01G009500	SoyL06_01G009600	SoyL07_01G010000	SoyL08_01G009800	SoyL09_01G009900	SoyC01_01G009900	SoyC02_01G009500	SoyC03_01G009800	SoyC04_01G010100	SoyC05_01G010200	SoyC06_01G009800	SoyC07_01G009600	SoyC08_01G009600	SoyC09_01G009800	.	SoyC11_01G009400	SoyC12_01G009700	SoyC13_01G010000	SoyC14_01G009800
SoyW01_01G010300	SoyW02_01G009700	SoyW03_01G010000	SoyL01_01G009700	SoyL02_01G009700	SoyL03_01G009700	SoyL04_01G010200	SoyL05_01G009600	SoyL06_01G009700	SoyL07_01G010100	SoyL08_01G009900	SoyL09_01G010000	SoyC01_01G010000	SoyC02_01G009600	SoyC03_01G009900	SoyC04_01G010200	SoyC05_01G010300	SoyC06_01G009900	SoyC07_01G009700	SoyC08_01G009700	SoyC09_01G009900	SoyC10_01G009600	SoyC11_01G009500	SoyC12_01G009800	SoyC13_01G010100	SoyC14_01G009900
SoyW01_01G010400	SoyW02_01G009800	SoyW03_01G010100	SoyL01_01G009800	SoyL02_01G009800	SoyL03_01G009800	SoyL04_01G010300	SoyL05_01G009700	SoyL06_01G009800	SoyL07_01G010200	SoyL08_01G010000	SoyL09_01G010100	SoyC01_01G010100	SoyC02_01G009700	SoyC03_01G010000	SoyC04_01G010300	SoyC05_01G010400	SoyC06_01G010000	SoyC07_01G009800	SoyC08_01G009800	SoyC09_01G010000	SoyC10_01G009700	SoyC11_01G009600	SoyC12_01G009900	SoyC13_01G010200	SoyC14_01G010000
SoyW01_01G010500	SoyW02_01G009900	SoyW03_01G010200	SoyL01_01G009900	SoyL02_01G009900	SoyL03_01G009900	SoyL04_01G010400	SoyL05_01G009800	SoyL06_01G009900	SoyL07_01G010300	SoyL08_01G010100	SoyL09_01G010200	SoyC01_01G010200	SoyC02_01G009800	SoyC03_01G010100	SoyC04_01G010400	SoyC05_01G010500	SoyC06_01G010100	SoyC07_01G009900	SoyC08_01G009900	SoyC09_01G010100	SoyC10_01G009800	SoyC11_01G009700	SoyC12_01G010000	SoyC13_01G010300	SoyC14_01G010100
SoyW01_01G010600	SoyW02_01G010200	SoyW03_01G010500	.	.	.	SoyL04_01G010700	.	SoyL06_01G010200	SoyL07_01G010600	SoyL08_01G010400	SoyL09_01G010500	.	SoyC02_01G010100	SoyC03_01G010400	SoyC04_01G010700	SoyC05_01G010800	SoyC06_01G010400	SoyC07_01G010200	.	SoyC09_01G010400	SoyC10_01G010100	.	.	SoyC13_01G010600	SoyC14_01G010400
SoyW01_01G010700	SoyW02_01G010100	SoyW03_01G010400	SoyL01_01G010100	SoyL02_01G010100	SoyL03_01G010100	SoyL04_01G010600	SoyL05_01G010000	SoyL06_01G010100	SoyL07_01G010500	SoyL08_01G010300	SoyL09_01G010400	SoyC01_01G010400	SoyC02_01G010000	SoyC03_01G010300	SoyC04_01G010600	SoyC05_01G010700	SoyC06_01G010300	SoyC07_01G010100	SoyC08_01G010100	SoyC09_01G010300	SoyC10_01G010000	SoyC11_01G009900	SoyC12_01G010200	SoyC13_01G010500	SoyC14_01G010300
SoyW01_01G010800	SoyW02_01G010000	SoyW03_01G010300	SoyL01_01G010000	SoyL02_01G010000	SoyL03_01G010000	SoyL04_01G010500	SoyL05_01G009900	SoyL06_01G010000	SoyL07_01G010400	SoyL08_01G010200	SoyL09_01G010300	SoyC01_01G010300	SoyC02_01G009900	SoyC03_01G010200	SoyC04_01G010500	SoyC05_01G010600	SoyC06_01G010200	SoyC07_01G010000	SoyC08_01G010000	SoyC09_01G010200	SoyC10_01G009900	SoyC11_01G009800	SoyC12_01G010100	SoyC13_01G010400	SoyC14_01G010200
SoyW01_01G010900	SoyW02_01G010300	SoyW03_01G010600	SoyL01_01G010200	SoyL02_01G010200	SoyL03_01G010200	SoyL04_01G010800	SoyL05_01G010100	SoyL06_01G010300	SoyL07_01G010700	SoyL08_01G010500	SoyL09_01G010600	SoyC01_01G010500	SoyC02_01G010200	SoyC03_01G010500	SoyC04_01G010800	SoyC05_01G010900	SoyC06_01G010500	SoyC07_01G010300	SoyC08_01G010200	SoyC09_01G010500	SoyC10_01G010200	SoyC11_01G010000	SoyC12_01G010300	SoyC13_01G010700	SoyC14_01G010500
SoyW01_01G011000	SoyW02_01G010400	SoyW03_01G010700	SoyL01_01G010300	SoyL02_01G010300	SoyL03_01G010300	SoyL04_01G010900	SoyL05_01G010200	SoyL06_01G010400	SoyL07_01G010800	SoyL08_01G010600	SoyL09_01G010700	SoyC01_01G010600	SoyC02_01G010300	SoyC03_01G010600	SoyC04_01G010900	SoyC05_01G011000	SoyC06_01G010600	SoyC07_01G010400	SoyC08_01G010300	SoyC09_01G010600	SoyC10_01G010300	SoyC11_01G010100	SoyC12_01G010400	SoyC13_01G010750	SoyC14_01G010600
SoyW01_01G011100	SoyW02_01G010500	SoyW03_01G010800	SoyL01_01G010400	SoyL02_01G010400	SoyL03_01G010400	SoyL04_01G011000	SoyL05_01G010300	SoyL06_01G010500	SoyL07_01G010900	SoyL08_01G010700	SoyL09_01G010800	SoyC01_01G010700	SoyC02_01G010400	SoyC03_01G010700	SoyC04_01G011000	SoyC05_01G011100	SoyC06_01G010700	SoyC07_01G010500	SoyC08_01G010400	SoyC09_01G010700	SoyC10_01G010400	SoyC11_01G010200	SoyC12_01G010500	SoyC13_01G010800	SoyC14_01G010700
SoyW01_01G011200	SoyW02_01G010600	SoyW03_01G010900	SoyL01_01G010500	SoyL02_01G010500	SoyL03_01G010500	SoyL04_01G011100	SoyL05_01G010400	SoyL06_01G010600	SoyL07_01G011000	SoyL08_01G010800	SoyL09_01G010900	SoyC01_01G010800	SoyC02_01G010500	SoyC03_01G010800	SoyC04_01G011100	SoyC05_01G011200	SoyC06_01G010800	SoyC07_01G010600	SoyC08_01G010500	SoyC09_01G010800	SoyC10_01G010500	SoyC11_01G010300	SoyC12_01G010600	SoyC13_01G010900	SoyC14_01G010800
SoyW01_01G011300	SoyW02_01G010700	SoyW03_01G011000	SoyL01_01G010600	SoyL02_01G010600	SoyL03_01G010600	SoyL04_01G011200	SoyL05_01G010500	SoyL06_01G010700	SoyL07_01G011100	SoyL08_01G010900	SoyL09_01G011000	SoyC01_01G010900	SoyC02_01G010600	SoyC03_01G010900	SoyC04_01G011200	SoyC05_01G011300	SoyC06_01G010900	SoyC07_01G010700	SoyC08_01G010600	SoyC09_01G010900	SoyC10_01G010600	SoyC11_01G010400	SoyC12_01G010700	SoyC13_01G011000	SoyC14_01G010900
SoyW01_01G011400	SoyW02_01G011200	SoyW03_01G011700	SoyL01_01G011100	SoyL02_01G011100	SoyL03_01G011100	.	SoyL05_01G011000	SoyL06_01G011200	SoyL07_01G011600	SoyL08_01G011400	SoyL09_01G011500	.	.	SoyC03_01G011400	SoyC04_01G011700	SoyC05_01G011800	SoyC06_01G011300	SoyC07_01G011200	SoyC08_01G011100	SoyC09_01G011300	SoyC10_01G011100	SoyC11_01G010900	SoyC12_01G011200	SoyC13_01G011500	SoyC14_01G011400
SoyW01_01G011500	SoyW02_01G010900	SoyW03_01G011200	SoyL01_01G010800	SoyL02_01G010800	SoyL03_01G010800	SoyL04_01G011700	SoyL05_01G010700	SoyL06_01G010900	SoyL07_01G011300	SoyL08_01G011100	SoyL09_01G011200	SoyC01_01G011400	SoyC02_01G010800	SoyC03_01G011100	SoyC04_01G011400	SoyC05_01G011500	SoyC06_01G011100	SoyC07_01G010900	SoyC08_01G010800	SoyC09_01G011100	SoyC10_01G010800	SoyC11_01G010600	SoyC12_01G010900	SoyC13_01G011200	SoyC14_01G011100
SoyW01_01G011600	SoyW02_01G011100	SoyW03_01G011400	.	SoyL02_01G011000	.	SoyL04_01G011600	.	SoyL06_01G011100	SoyL07_01G011500	.	.	.	.	.	.	.	.	SoyC07_01G011100	SoyC08_01G011000	.	SoyC10_01G011000	.	SoyC12_01G011900	SoyC13_01G011400	SoyC14_01G011300
SoyW01_01G011700	SoyW02_01G011700	SoyW03_01G011600	.	.	.	SoyL04_01G012200	.	.	SoyL07_01G012100	.	SoyL09_01G012000	.	.	SoyC03_01G011800	.	.	.	.	.	.	SoyC10_01G011600	.	.	.	.
SoyW01_01G011800	.	.	SoyL01_01G010700	.	SoyL03_01G010700	.	.	SoyL06_01G010800	SoyL07_01G011200	SoyL08_01G011000	.	.	SoyC02_01G011000	SoyC03_01G011000	.	.	.	.	SoyC08_01G010700	SoyC09_01G011000	SoyC10_01G010700	SoyC11_01G010500	SoyC12_01G010800	SoyC13_01G011100	SoyC14_01G011000
SoyW01_01G011900	SoyW02_01G012200	SoyW03_01G012600	SoyL01_01G011600	SoyL02_01G011900	SoyL03_01G011600	SoyL04_01G012700	SoyL05_01G011400	SoyL06_01G011600	SoyL07_01G012600	SoyL08_01G011900	SoyL09_01G012500	SoyC01_01G011900	SoyC02_01G011500	SoyC03_01G011900	SoyC04_01G012100	SoyC05_01G012300	SoyC06_01G011800	SoyC07_01G011600	SoyC08_01G011900	SoyC09_01G011700	SoyC10_01G011500	SoyC11_01G011400	SoyC12_01G011500	SoyC13_01G012000	SoyC14_01G011900
SoyW01_01G012000	SoyW02_01G012300	.	.	.	.	.	.	.	.	.	.	.	.	.	.	.	.	.	.	.	.	.	.	.	.
SoyW01_01G012100	SoyW02_01G012100	SoyW03_01G012500	SoyL01_01G012200	SoyL02_01G011800	SoyL03_01G012300	SoyL04_01G012600	SoyL05_01G012000	SoyL06_01G012200	SoyL07_01G012500	SoyL08_01G012600	SoyL09_01G012400	SoyC01_01G012600	SoyC02_01G012100	SoyC03_01G012600	SoyC04_01G012800	SoyC05_01G013000	SoyC06_01G012400	SoyC07_01G012200	SoyC08_01G011800	SoyC09_01G012400	SoyC10_01G012300	SoyC11_01G012100	SoyC12_01G012100	SoyC13_01G012700	SoyC14_01G012500
SoyW01_01G012200	.	.	.	.	SoyL03_01G011200	.	SoyL05_01G011100	.	.	.	.	SoyC01_01G011500	.	.	.	SoyC05_01G011700	.	.	.	.	SoyC10_01G011200	.	.	.	SoyC14_01G011500
SoyW01_01G012300	.	.	.	.	.	.	.	.	.	SoyL08_01G011500	.	.	.	SoyC03_01G011500	SoyC04_01G011750	.	.	.	.	SoyC09_01G011400	.	SoyC11_01G011000	.	SoyC13_01G011600	.
SoyW01_01G012400	SoyW02_01G011800	SoyW03_01G012200	.	SoyL02_01G011500	SoyL03_01G011700	SoyL04_01G012300	SoyL05_01G011500	.	SoyL07_01G012200	SoyL08_01G012000	SoyL09_01G012100	SoyC01_01G012000	.	SoyC03_01G012000	SoyC04_01G012200	SoyC05_01G012400	.	.	.	SoyC09_01G011800	SoyC10_01G011700	SoyC11_01G011500	.	SoyC13_01G012100	SoyC14_01G012000
SoyW01_01G012500	SoyW02_01G011900	SoyW03_01G012300	SoyL01_01G011700	SoyL02_01G011600	SoyL03_01G011800	SoyL04_01G012400	SoyL05_01G011600	SoyL06_01G011700	SoyL07_01G012300	SoyL08_01G012100	SoyL09_01G012200	SoyC01_01G012100	SoyC02_01G011600	SoyC03_01G012100	SoyC04_01G012300	SoyC05_01G012500	SoyC06_01G011900	SoyC07_01G011700	SoyC08_01G011600	SoyC09_01G011900	SoyC10_01G011800	SoyC11_01G011600	SoyC12_01G011600	SoyC13_01G012200	SoyC14_01G012100
SoyW01_01G012600	SoyW02_01G012000	SoyW03_01G012400	.	SoyL02_01G011700	.	SoyL04_01G012500	SoyL05_01G011700	.	SoyL07_01G012400	.	SoyL09_01G012300	.	SoyC02_01G012000	.	.	.	.	.	SoyC08_01G011700	.	.	.	.	.	SoyC14_01G012200
SoyW01_01G012700	.	.	SoyL01_01G011500	.	SoyL03_01G011500	.	SoyL05_01G012100	SoyL06_01G012300	.	SoyL08_01G011800	.	SoyC01_01G011800	SoyC02_01G012200	SoyC03_01G012700	SoyC04_01G012000	SoyC05_01G012200	SoyC06_01G012500	SoyC07_01G012300	.	.	SoyC10_01G012400	SoyC11_01G012200	SoyC12_01G012200	SoyC13_01G012800	SoyC14_01G012600
SoyW01_01G012800	SoyW02_01G013100	SoyW03_01G012800	SoyL01_01G012400	SoyL02_01G012100	SoyL03_01G012600	SoyL04_01G012900	SoyL05_01G012300	SoyL06_01G012500	SoyL07_01G012800	SoyL08_01G012900	SoyL09_01G012700	SoyC01_01G012900	SoyC02_01G012300	SoyC03_01G012900	SoyC04_01G013100	SoyC05_01G013300	SoyC06_01G012700	SoyC07_01G012500	SoyC08_01G012100	SoyC09_01G012700	SoyC10_01G012600	SoyC11_01G012400	SoyC12_01G012400	SoyC13_01G013000	SoyC14_01G012800
SoyW01_01G012900	SoyW02_01G011500	SoyW03_01G011900	SoyL01_01G011400	SoyL02_01G011400	SoyL03_01G011400	SoyL04_01G012000	SoyL05_01G011300	SoyL06_01G011500	SoyL07_01G011900	SoyL08_01G011700	SoyL09_01G011800	SoyC01_01G011700	SoyC02_01G011400	SoyC03_01G011700	SoyC04_01G011900	.	SoyC06_01G011700	SoyC07_01G011500	SoyC08_01G011400	SoyC09_01G011500	SoyC10_01G011400	SoyC11_01G011200	SoyC12_01G011400	SoyC13_01G011800	SoyC14_01G011700
SoyW01_01G013000	SoyW02_01G011300	SoyW03_01G011750	SoyL01_01G011200	SoyL02_01G011200	SoyL03_01G012100	SoyL04_01G011800	SoyL05_01G011800	SoyL06_01G011300	SoyL07_01G011700	SoyL08_01G012400	SoyL09_01G011600	SoyC01_01G012400	SoyC02_01G011200	SoyC03_01G012400	SoyC04_01G012600	SoyC05_01G012800	SoyC06_01G011500	SoyC07_01G011300	SoyC08_01G011200	SoyC09_01G012200	SoyC10_01G012100	SoyC11_01G011900	SoyC12_01G011300	SoyC13_01G012500	SoyC14_01G012300
SoyW01_01G013100	.	.	.	.	.	.	.	.	.	.	.	.	SoyC02_01G012400	.	.	.	.	.	.	.	.	.	.	.	.
SoyW01_01G013200	SoyW02_01G012700	SoyW03_01G012700	SoyL01_01G012100	SoyL02_01G012000	SoyL03_01G012200	SoyL04_01G012800	SoyL05_01G011900	SoyL06_01G012100	SoyL07_01G012700	SoyL08_01G012500	SoyL09_01G012600	SoyC01_01G012500	.	SoyC03_01G012500	SoyC04_01G012700	SoyC05_01G012900	SoyC06_01G012300	SoyC07_01G012100	SoyC08_01G012000	SoyC09_01G012300	SoyC10_01G012200	SoyC11_01G012000	SoyC12_01G012000	SoyC13_01G012600	SoyC14_01G012400
SoyW01_01G013350	SoyW02_01G012900	SoyW03_01G012900	SoyL01_01G012500	SoyL02_01G012200	SoyL03_01G012700	SoyL04_01G013000	SoyL05_01G012400	SoyL06_01G012600	SoyL07_01G012950	SoyL08_01G013000	SoyL09_01G012800	SoyC01_01G013000	SoyC02_01G012500	SoyC03_01G013000	SoyC04_01G013200	SoyC05_01G013400	SoyC06_01G012800	SoyC07_01G012600	SoyC08_01G012200	.	SoyC10_01G012700	SoyC11_01G012500	SoyC12_01G012500	SoyC13_01G013100	SoyC14_01G012900
SoyW01_01G013500	SoyW02_01G013300	SoyW03_01G013200	SoyL01_01G012600	SoyL02_01G012300	SoyL03_01G012800	SoyL04_01G013300	SoyL05_01G012500	SoyL06_01G012700	SoyL07_01G013300	SoyL08_01G013200	SoyL09_01G013100	SoyC01_01G013100	SoyC02_01G012600	SoyC03_01G013100	SoyC04_01G013500	SoyC05_01G013700	SoyC06_01G012900	SoyC07_01G012700	SoyC08_01G012300	SoyC09_01G012900	SoyC10_01G012800	SoyC11_01G012600	SoyC12_01G012600	SoyC13_01G013200	SoyC14_01G013000
SoyW01_01G013600	SoyW02_01G013400	SoyW03_01G013300	SoyL01_01G012700	SoyL02_01G012400	SoyL03_01G012900	SoyL04_01G013400	SoyL05_01G012600	SoyL06_01G012800	SoyL07_01G013400	SoyL08_01G013300	SoyL09_01G013200	SoyC01_01G013200	SoyC02_01G012700	SoyC03_01G013200	SoyC04_01G013600	SoyC05_01G013800	SoyC06_01G013000	SoyC07_01G012800	SoyC08_01G012400	SoyC09_01G013000	SoyC10_01G012900	SoyC11_01G012700	SoyC12_01G012700	SoyC13_01G013300	SoyC14_01G013100
SoyW01_01G013700	SoyW02_01G013500	SoyW03_01G013400	SoyL01_01G012800	SoyL02_01G012500	SoyL03_01G013000	SoyL04_01G013500	SoyL05_01G012700	SoyL06_01G012900	SoyL07_01G013500	SoyL08_01G013400	SoyL09_01G013300	SoyC01_01G013300	SoyC02_01G012800	SoyC03_01G013300	SoyC04_01G013700	SoyC05_01G013900	SoyC06_01G013100	SoyC07_01G012900	SoyC08_01G012500	SoyC09_01G013100	SoyC10_01G013000	SoyC11_01G012800	SoyC12_01G012800	SoyC13_01G013400	SoyC14_01G013200
SoyW01_01G013800	SoyW02_01G013600	SoyW03_01G013500	SoyL01_01G012900	SoyL02_01G012600	SoyL03_01G013100	SoyL04_01G013600	SoyL05_01G012800	SoyL06_01G013000	SoyL07_01G013600	SoyL08_01G013500	SoyL09_01G013400	SoyC01_01G013400	SoyC02_01G012900	SoyC03_01G013400	SoyC04_01G013800	SoyC05_01G014000	SoyC06_01G013200	SoyC07_01G013000	SoyC08_01G012600	SoyC09_01G013200	SoyC10_01G013100	SoyC11_01G012900	SoyC12_01G012900	SoyC13_01G013500	SoyC14_01G013300
SoyW01_01G013900	SoyW02_01G013700	SoyW03_01G013600	SoyL01_01G013000	SoyL02_01G012700	SoyL03_01G013200	SoyL04_01G013700	SoyL05_01G012900	SoyL06_01G013100	SoyL07_01G013700	SoyL08_01G013600	SoyL09_01G013500	SoyC01_01G013500	SoyC02_01G013000	SoyC03_01G013500	SoyC04_01G013900	SoyC05_01G014100	SoyC06_01G013300	SoyC07_01G013100	SoyC08_01G012700	SoyC09_01G013300	SoyC10_01G013200	SoyC11_01G013000	SoyC12_01G013000	SoyC13_01G013600	SoyC14_01G013400
SoyW01_01G014000	SoyW02_01G013800	SoyW03_01G013700	SoyL01_01G013100	SoyL02_01G012800	SoyL03_01G013300	SoyL04_01G013800	SoyL05_01G013000	SoyL06_01G013200	SoyL07_01G013800	SoyL08_01G013700	SoyL09_01G013600	SoyC01_01G013600	SoyC02_01G013100	SoyC03_01G013600	SoyC04_01G014000	SoyC05_01G014200	SoyC06_01G013400	SoyC07_01G013200	SoyC08_01G012800	SoyC09_01G013400	SoyC10_01G013300	SoyC11_01G013100	SoyC12_01G013100	SoyC13_01G013700	SoyC14_01G013500
SoyW01_01G014100	SoyW02_01G013900	SoyW03_01G013800	SoyL01_01G013200	SoyL02_01G012900	SoyL03_01G013400	SoyL04_01G013900	SoyL05_01G013100	SoyL06_01G013300	SoyL07_01G013900	SoyL08_01G013800	SoyL09_01G013700	SoyC01_01G013700	SoyC02_01G013200	SoyC03_01G013700	SoyC04_01G014100	SoyC05_01G014300	SoyC06_01G013500	SoyC07_01G013300	SoyC08_01G012900	SoyC09_01G013500	SoyC10_01G013400	SoyC11_01G013200	SoyC12_01G013200	SoyC13_01G013800	SoyC14_01G013600
SoyW01_01G014200	SoyW02_01G014000	SoyW03_01G013900	SoyL01_01G013300	SoyL02_01G013000	SoyL03_01G013500	SoyL04_01G014000	SoyL05_01G013200	SoyL06_01G013400	SoyL07_01G014000	SoyL08_01G013900	SoyL09_01G013800	SoyC01_01G013800	SoyC02_01G013300	SoyC03_01G013800	SoyC04_01G014200	SoyC05_01G014400	SoyC06_01G013600	SoyC07_01G013400	SoyC08_01G013000	SoyC09_01G013600	SoyC10_01G013500	SoyC11_01G013300	SoyC12_01G013300	SoyC13_01G013900	SoyC14_01G013700
SoyW01_01G014300	SoyW02_01G014100	SoyW03_01G014000	SoyL01_01G013400	SoyL02_01G013100	SoyL03_01G013600	SoyL04_01G014100	SoyL05_01G013300	SoyL06_01G013500	SoyL07_01G014100	SoyL08_01G014000	SoyL09_01G013900	SoyC01_01G013900	SoyC02_01G013400	SoyC03_01G013900	SoyC04_01G014300	SoyC05_01G014500	SoyC06_01G013700	SoyC07_01G013500	SoyC08_01G013100	SoyC09_01G013700	SoyC10_01G013600	SoyC11_01G013400	SoyC12_01G013400	SoyC13_01G014000	SoyC14_01G013800
SoyW01_01G014400	SoyW02_01G014200	SoyW03_01G014100	SoyL01_01G013500	SoyL02_01G013200	SoyL03_01G013700	SoyL04_01G014200	SoyL05_01G013400	SoyL06_01G013600	SoyL07_01G014200	SoyL08_01G014100	SoyL09_01G014000	SoyC01_01G014000	SoyC02_01G013500	SoyC03_01G014000	SoyC04_01G014400	SoyC05_01G014600	SoyC06_01G013800	SoyC07_01G013600	SoyC08_01G013200	SoyC09_01G013800	SoyC10_01G013700	SoyC11_01G013500	SoyC12_01G013500	SoyC13_01G014100	SoyC14_01G013900
SoyW01_01G014500	SoyW02_01G014300	SoyW03_01G014200	SoyL01_01G013600	SoyL02_01G013300	SoyL03_01G013800	SoyL04_01G014300	SoyL05_01G013500	SoyL06_01G013700	SoyL07_01G014300	SoyL08_01G014200	SoyL09_01G014100	SoyC01_01G014100	SoyC02_01G013600	SoyC03_01G014100	SoyC04_01G014500	SoyC05_01G014700	SoyC06_01G013900	SoyC07_01G013700	SoyC08_01G013300	SoyC09_01G013900	SoyC10_01G013800	SoyC11_01G013600	SoyC12_01G013600	SoyC13_01G014200	SoyC14_01G014000
SoyW01_01G014600	SoyW02_01G014400	SoyW03_01G014300	SoyL01_01G013700	SoyL02_01G013400	SoyL03_01G013900	SoyL04_01G014400	SoyL05_01G013600	SoyL06_01G013800	SoyL07_01G014400	SoyL08_01G014300	SoyL09_01G014200	SoyC01_01G014200	SoyC02_01G013700	SoyC03_01G014200	SoyC04_01G014600	SoyC05_01G014800	SoyC06_01G014000	SoyC07_01G013800	SoyC08_01G013400	SoyC09_01G014000	SoyC10_01G014000	SoyC11_01G013700	SoyC12_01G013700	SoyC13_01G014300	SoyC14_01G014100
SoyW01_01G014700	.	.	.	.	SoyL03_01G014200	.	.	.	.	SoyL08_01G014600	SoyL09_01G014500	SoyC01_01G014500	.	SoyC03_01G014500	.	.	SoyC06_01G014300	.	.	SoyC09_01G014300	.	.	.	.	.
SoyW01_01G014800	SoyW02_01G014600	SoyW03_01G014500	SoyL01_01G013900	SoyL02_01G013600	SoyL03_01G014100	SoyL04_01G014600	SoyL05_01G013800	SoyL06_01G014000	SoyL07_01G014600	SoyL08_01G014500	SoyL09_01G014400	SoyC01_01G014400	SoyC02_01G013900	SoyC03_01G014400	SoyC04_01G014800	SoyC05_01G014900	SoyC06_01G014200	SoyC07_01G014000	SoyC08_01G013600	SoyC09_01G014200	SoyC10_01G014200	SoyC11_01G013900	SoyC12_01G013900	SoyC13_01G014500	SoyC14_01G014300
SoyW01_01G014900	.	.	.	SoyL02_01G013500	SoyL03_01G014000	SoyL04_01G014500	.	SoyL06_01G013900	SoyL07_01G014500	SoyL08_01G014400	.	.	SoyC02_01G013800	.	.	.	SoyC06_01G014100	SoyC07_01G013900	.	.	.	SoyC11_01G013800	SoyC12_01G013800	.	.
SoyW01_01G015000	SoyW02_01G014700	SoyW03_01G014600	SoyL01_01G013800	SoyL02_01G013700	.	SoyL04_01G014700	SoyL05_01G013700	SoyL06_01G014100	SoyL07_01G014700	SoyL08_01G014700	SoyL09_01G014600	SoyC01_01G014600	SoyC02_01G014000	SoyC03_01G014600	SoyC04_01G014900	SoyC05_01G015000	SoyC06_01G014400	SoyC07_01G014100	SoyC08_01G013500	SoyC09_01G014400	SoyC10_01G014300	SoyC11_01G014000	SoyC12_01G014000	SoyC13_01G014400	SoyC14_01G014400
SoyW01_01G015100	SoyW02_01G014900	SoyW03_01G014800	SoyL01_01G014100	SoyL02_01G013900	SoyL03_01G014300	SoyL04_01G014900	SoyL05_01G014000	SoyL06_01G014200	SoyL07_01G014900	SoyL08_01G014800	SoyL09_01G014800	SoyC01_01G014800	SoyC02_01G014100	SoyC03_01G014700	SoyC04_01G015100	SoyC05_01G015200	SoyC06_01G014600	SoyC07_01G014200	SoyC08_01G013800	SoyC09_01G014600	SoyC10_01G014500	SoyC11_01G014200	SoyC12_01G014100	SoyC13_01G014700	SoyC14_01G014600
SoyW01_01G015200	SoyW02_01G015000	SoyW03_01G014900	SoyL01_01G014200	SoyL02_01G014000	SoyL03_01G014400	SoyL04_01G015000	SoyL05_01G014100	SoyL06_01G014300	SoyL07_01G015000	SoyL08_01G014900	SoyL09_01G014900	SoyC01_01G014900	SoyC02_01G014200	SoyC03_01G014800	SoyC04_01G015200	SoyC05_01G015300	SoyC06_01G014700	SoyC07_01G014300	SoyC08_01G013900	SoyC09_01G014700	SoyC10_01G014600	SoyC11_01G014300	SoyC12_01G014200	SoyC13_01G014800	SoyC14_01G014700
SoyW01_01G015300	SoyW02_01G015100	SoyW03_01G015000	SoyL01_01G014300	SoyL02_01G014100	SoyL03_01G014500	SoyL04_01G015100	SoyL05_01G014200	SoyL06_01G014400	SoyL07_01G015100	SoyL08_01G015000	SoyL09_01G015000	SoyC01_01G015000	SoyC02_01G014300	SoyC03_01G014900	SoyC04_01G015300	SoyC05_01G015400	SoyC06_01G014800	SoyC07_01G014400	SoyC08_01G014000	SoyC09_01G014800	SoyC10_01G014700	SoyC11_01G014400	SoyC12_01G014300	SoyC13_01G014900	SoyC14_01G014800
SoyW01_01G015400	SoyW02_01G015200	SoyW03_01G015100	SoyL01_01G014400	SoyL02_01G014200	SoyL03_01G014600	SoyL04_01G015200	SoyL05_01G014300	SoyL06_01G014500	SoyL07_01G015200	SoyL08_01G015100	SoyL09_01G015100	SoyC01_01G015100	SoyC02_01G014400	SoyC03_01G015000	SoyC04_01G015400	SoyC05_01G015500	SoyC06_01G014900	SoyC07_01G014500	SoyC08_01G014100	SoyC09_01G014900	SoyC10_01G014800	SoyC11_01G014500	SoyC12_01G014400	SoyC13_01G015000	SoyC14_01G014900
SoyW01_01G015500	SoyW02_01G015300	SoyW03_01G015200	SoyL01_01G014500	SoyL02_01G014300	SoyL03_01G014700	SoyL04_01G015300	SoyL05_01G014400	SoyL06_01G014600	SoyL07_01G015300	SoyL08_01G015200	SoyL09_01G015200	SoyC01_01G015200	SoyC02_01G014500	SoyC03_01G015100	SoyC04_01G015500	SoyC05_01G015600	SoyC06_01G015000	SoyC07_01G014600	SoyC08_01G014200	SoyC09_01G015000	SoyC10_01G014900	SoyC11_01G014600	SoyC12_01G014500	SoyC13_01G015100	SoyC14_01G015000
SoyW01_01G015600	SoyW02_01G015400	SoyW03_01G015300	SoyL01_01G014600	SoyL02_01G014400	SoyL03_01G014800	SoyL04_01G015400	SoyL05_01G014500	.	SoyL07_01G015400	.	SoyL09_01G015300	SoyC01_01G015300	SoyC02_01G014600	SoyC03_01G015200	SoyC04_01G015600	SoyC05_01G015700	SoyC06_01G015100	SoyC07_01G014700	SoyC08_01G014300	SoyC09_01G015100	SoyC10_01G015000	SoyC11_01G014700	SoyC12_01G014600	SoyC13_01G015200	SoyC14_01G015100
SoyW01_01G015800	SoyW02_01G015500	SoyW03_01G015400	.	SoyL02_01G014600	SoyL03_01G015000	SoyL04_01G015600	SoyL05_01G014600	SoyL06_01G014750	SoyL07_01G015600	SoyL08_01G015400	SoyL09_01G015500	SoyC01_01G015500	.	SoyC03_01G015400	SoyC04_01G015800	SoyC05_01G015900	SoyC06_01G015200	SoyC07_01G014800	.	SoyC09_01G015200	SoyC10_01G015150	SoyC11_01G014850	SoyC12_01G014700	SoyC13_01G015400	SoyC14_01G015200
SoyW01_01G015900	SoyW02_01G015600	SoyW03_01G015500	SoyL01_01G014700	SoyL02_01G014700	SoyL03_01G015100	SoyL04_01G015700	SoyL05_01G014700	SoyL06_01G014800	SoyL07_01G015700	SoyL08_01G015500	SoyL09_01G015600	SoyC01_01G015600	SoyC02_01G014700	SoyC03_01G015500	SoyC04_01G015900	SoyC05_01G016000	SoyC06_01G015300	SoyC07_01G014900	SoyC08_01G014400	SoyC09_01G015300	SoyC10_01G015200	SoyC11_01G014900	SoyC12_01G014800	SoyC13_01G015500	SoyC14_01G015300
SoyW01_01G016000	SoyW02_01G015700	SoyW03_01G015600	SoyL01_01G014800	SoyL02_01G014800	SoyL03_01G015200	SoyL04_01G015800	SoyL05_01G014800	SoyL06_01G014900	SoyL07_01G015800	SoyL08_01G015600	SoyL09_01G015700	SoyC01_01G015700	SoyC02_01G014800	SoyC03_01G015600	SoyC04_01G016000	SoyC05_01G016100	SoyC06_01G015400	SoyC07_01G015000	SoyC08_01G014500	SoyC09_01G015400	SoyC10_01G015300	SoyC11_01G015000	SoyC12_01G014900	SoyC13_01G015600	SoyC14_01G015400
SoyW01_01G016100	SoyW02_01G015800	SoyW03_01G015700	SoyL01_01G014900	SoyL02_01G014900	SoyL03_01G015300	SoyL04_01G015900	SoyL05_01G014900	SoyL06_01G015000	SoyL07_01G015900	SoyL08_01G015700	SoyL09_01G015800	SoyC01_01G015800	SoyC02_01G014900	SoyC03_01G015700	SoyC04_01G016100	SoyC05_01G016200	SoyC06_01G015500	SoyC07_01G015100	SoyC08_01G014600	SoyC09_01G015500	SoyC10_01G015400	SoyC11_01G015100	SoyC12_01G015000	SoyC13_01G015700	SoyC14_01G015500
SoyW01_01G016200	SoyW02_01G015900	SoyW03_01G015800	SoyL01_01G015000	SoyL02_01G015000	SoyL03_01G015400	SoyL04_01G016000	SoyL05_01G015000	SoyL06_01G015100	SoyL07_01G016000	SoyL08_01G015800	SoyL09_01G015900	SoyC01_01G015900	SoyC02_01G015000	SoyC03_01G015800	SoyC04_01G016200	SoyC05_01G016300	SoyC06_01G015600	SoyC07_01G015200	SoyC08_01G014700	SoyC09_01G015600	SoyC10_01G015500	SoyC11_01G015200	SoyC12_01G015100	SoyC13_01G015800	SoyC14_01G015600
SoyW01_01G016300	SoyW02_01G016000	SoyW03_01G015900	SoyL01_01G015100	SoyL02_01G015100	SoyL03_01G015500	SoyL04_01G016100	SoyL05_01G015100	SoyL06_01G015200	SoyL07_01G016100	SoyL08_01G015900	SoyL09_01G016000	SoyC01_01G016000	SoyC02_01G015100	SoyC03_01G015900	SoyC04_01G016300	SoyC05_01G016400	SoyC06_01G015700	SoyC07_01G015300	SoyC08_01G014800	SoyC09_01G015700	SoyC10_01G015600	SoyC11_01G015300	SoyC12_01G015200	SoyC13_01G015900	SoyC14_01G015700
SoyW01_01G016400	SoyW02_01G016100	SoyW03_01G016000	SoyL01_01G015200	SoyL02_01G015200	SoyL03_01G015600	SoyL04_01G016200	SoyL05_01G015200	SoyL06_01G015300	SoyL07_01G016200	SoyL08_01G016000	SoyL09_01G016100	SoyC01_01G016100	SoyC02_01G015200	SoyC03_01G016000	SoyC04_01G016400	SoyC05_01G016500	SoyC06_01G015800	SoyC07_01G015400	SoyC08_01G014900	SoyC09_01G015800	SoyC10_01G015700	SoyC11_01G015400	SoyC12_01G015300	SoyC13_01G016000	SoyC14_01G015800
SoyW01_01G016500	SoyW02_01G016200	SoyW03_01G016100	SoyL01_01G015300	SoyL02_01G015300	SoyL03_01G015700	SoyL04_01G016300	SoyL05_01G015300	SoyL06_01G015400	SoyL07_01G016300	SoyL08_01G016100	SoyL09_01G016200	SoyC01_01G016200	SoyC02_01G015300	SoyC03_01G016100	SoyC04_01G016500	SoyC05_01G016600	SoyC06_01G015900	SoyC07_01G015500	SoyC08_01G015000	SoyC09_01G015900	SoyC10_01G015800	SoyC11_01G015500	SoyC12_01G015400	SoyC13_01G016100	SoyC14_01G015900
SoyW01_01G016600	SoyW02_01G016300	SoyW03_01G016200	SoyL01_01G015400	SoyL02_01G015400	SoyL03_01G015800	SoyL04_01G016400	SoyL05_01G015400	SoyL06_01G015500	SoyL07_01G016400	SoyL08_01G016200	SoyL09_01G016300	SoyC01_01G016300	SoyC02_01G015400	SoyC03_01G016200	SoyC04_01G016600	SoyC05_01G016700	SoyC06_01G016000	SoyC07_01G015600	SoyC08_01G015100	SoyC09_01G016000	SoyC10_01G015900	SoyC11_01G015600	SoyC12_01G015500	SoyC13_01G016200	SoyC14_01G016000
SoyW01_01G016700	SoyW02_01G016400	SoyW03_01G016300	SoyL01_01G015500	SoyL02_01G015500	SoyL03_01G015900	SoyL04_01G016500	SoyL05_01G015500	SoyL06_01G015700	SoyL07_01G016500	SoyL08_01G016300	SoyL09_01G016500	SoyC01_01G016400	SoyC02_01G015500	SoyC03_01G016300	SoyC04_01G016700	SoyC05_01G016800	SoyC06_01G016100	SoyC07_01G015800	SoyC08_01G015300	SoyC09_01G016200	SoyC10_01G016000	SoyC11_01G015800	SoyC12_01G015700	SoyC13_01G016300	SoyC14_01G016100
SoyW01_01G016800	SoyW02_01G016500	SoyW03_01G016400	SoyL01_01G015600	SoyL02_01G015600	SoyL03_01G016000	SoyL04_01G016600	SoyL05_01G015600	SoyL06_01G015800	SoyL07_01G016600	SoyL08_01G016400	SoyL09_01G016600	SoyC01_01G016500	SoyC02_01G015600	SoyC03_01G016400	SoyC04_01G016800	SoyC05_01G016900	SoyC06_01G016200	SoyC07_01G015900	SoyC08_01G015400	SoyC09_01G016300	SoyC10_01G016100	SoyC11_01G015900	SoyC12_01G015800	SoyC13_01G016400	SoyC14_01G016200
SoyW01_01G016900	SoyW02_01G016600	SoyW03_01G016500	SoyL01_01G015700	SoyL02_01G015700	SoyL03_01G016100	SoyL04_01G016700	SoyL05_01G015700	SoyL06_01G015900	SoyL07_01G016700	SoyL08_01G016500	SoyL09_01G016700	SoyC01_01G016600	SoyC02_01G015700	SoyC03_01G016500	SoyC04_01G016900	SoyC05_01G017000	SoyC06_01G016300	SoyC07_01G016000	SoyC08_01G015500	SoyC09_01G016400	SoyC10_01G016200	SoyC11_01G016000	SoyC12_01G015900	SoyC13_01G016500	SoyC14_01G016300
SoyW01_01G017000	SoyW02_01G016700	SoyW03_01G016600	SoyL01_01G015800	SoyL02_01G015800	SoyL03_01G016200	SoyL04_01G016800	SoyL05_01G015800	SoyL06_01G016000	SoyL07_01G016800	SoyL08_01G016600	SoyL09_01G016800	SoyC01_01G016700	SoyC02_01G015800	SoyC03_01G016600	SoyC04_01G017000	SoyC05_01G017100	SoyC06_01G016400	SoyC07_01G016100	SoyC08_01G015600	SoyC09_01G016500	SoyC10_01G016300	SoyC11_01G016100	SoyC12_01G016000	SoyC13_01G016600	SoyC14_01G016400
SoyW01_01G017100	SoyW02_01G016800	SoyW03_01G016700	SoyL01_01G015900	SoyL02_01G015900	SoyL03_01G016300	SoyL04_01G016900	SoyL05_01G015900	SoyL06_01G016100	SoyL07_01G016900	SoyL08_01G016700	SoyL09_01G016900	SoyC01_01G016800	SoyC02_01G015900	SoyC03_01G016700	SoyC04_01G017100	SoyC05_01G017200	SoyC06_01G016500	SoyC07_01G016200	SoyC08_01G015700	SoyC09_01G016600	SoyC10_01G016400	SoyC11_01G016200	SoyC12_01G016100	SoyC13_01G016700	SoyC14_01G016500
SoyW01_01G017200	SoyW02_01G016900	SoyW03_01G016800	SoyL01_01G016000	SoyL02_01G016000	SoyL03_01G016400	SoyL04_01G017000	SoyL05_01G016000	SoyL06_01G016200	SoyL07_01G017000	SoyL08_01G016800	SoyL09_01G017000	SoyC01_01G016900	SoyC02_01G016000	SoyC03_01G016800	SoyC04_01G017200	SoyC05_01G017300	SoyC06_01G016600	SoyC07_01G016300	SoyC08_01G015800	SoyC09_01G016700	SoyC10_01G016500	SoyC11_01G016300	SoyC12_01G016200	SoyC13_01G016800	SoyC14_01G016600
SoyW01_01G017300	SoyW02_01G017000	SoyW03_01G016900	SoyL01_01G016100	SoyL02_01G016100	SoyL03_01G016500	SoyL04_01G017100	SoyL05_01G016100	SoyL06_01G016300	SoyL07_01G017100	SoyL08_01G016900	SoyL09_01G017100	SoyC01_01G017000	SoyC02_01G016100	SoyC03_01G016900	SoyC04_01G017300	SoyC05_01G017400	SoyC06_01G016700	SoyC07_01G016400	SoyC08_01G015900	SoyC09_01G016800	SoyC10_01G016600	SoyC11_01G016400	SoyC12_01G016300	SoyC13_01G016900	SoyC14_01G016700
SoyW01_01G017400	SoyW02_01G017100	SoyW03_01G017000	SoyL01_01G016200	SoyL02_01G016200	SoyL03_01G016600	SoyL04_01G017200	SoyL05_01G016200	SoyL06_01G016400	SoyL07_01G017200	SoyL08_01G017000	SoyL09_01G017200	SoyC01_01G017100	SoyC02_01G016200	SoyC03_01G017000	SoyC04_01G017400	SoyC05_01G017500	SoyC06_01G016800	SoyC07_01G016500	SoyC08_01G016000	SoyC09_01G016900	SoyC10_01G016700	SoyC11_01G016500	SoyC12_01G016400	SoyC13_01G017000	SoyC14_01G016800
SoyW01_01G017500	SoyW02_01G017200	SoyW03_01G017100	SoyL01_01G016300	SoyL02_01G016300	SoyL03_01G016700	SoyL04_01G017300	SoyL05_01G016300	SoyL06_01G016500	SoyL07_01G017300	SoyL08_01G017100	SoyL09_01G017300	SoyC01_01G017200	SoyC02_01G016300	SoyC03_01G017100	SoyC04_01G017500	SoyC05_01G017600	SoyC06_01G016900	SoyC07_01G016600	SoyC08_01G016100	SoyC09_01G017000	SoyC10_01G016800	SoyC11_01G016600	SoyC12_01G016500	SoyC13_01G017100	SoyC14_01G016900
SoyW01_01G017600	SoyW02_01G017300	SoyW03_01G017200	SoyL01_01G016500	SoyL02_01G016400	SoyL03_01G016900	.	SoyL05_01G016500	SoyL06_01G016700	SoyL07_01G017500	SoyL08_01G017300	SoyL09_01G017400	SoyC01_01G017400	SoyC02_01G016500	SoyC03_01G017300	SoyC04_01G017600	.	SoyC06_01G017000	SoyC07_01G016800	SoyC08_01G016300	SoyC09_01G017100	SoyC10_01G017000	SoyC11_01G016800	SoyC12_01G016700	SoyC13_01G017300	SoyC14_01G017000
SoyW01_01G017700	.	.	.	.	.	.	.	.	.	.	.	.	.	.	.	.	.	.	.	.	.	.	.	.	.
SoyW01_01G017800	SoyW02_01G017400	SoyW03_01G017300	SoyL01_01G016600	SoyL02_01G016500	SoyL03_01G017000	SoyL04_01G017500	SoyL05_01G016600	SoyL06_01G016800	SoyL07_01G017600	SoyL08_01G017400	SoyL09_01G017500	SoyC01_01G017500	SoyC02_01G016600	SoyC03_01G017400	SoyC04_01G017700	SoyC05_01G017900	SoyC06_01G017300	SoyC07_01G016900	SoyC08_01G016400	SoyC09_01G017300	SoyC10_01G017100	SoyC11_01G016900	SoyC12_01G016800	SoyC13_01G017500	SoyC14_01G017200
SoyW01_01G017900	SoyW02_01G017500	SoyW03_01G017400	SoyL01_01G016700	SoyL02_01G016600	SoyL03_01G017100	SoyL04_01G017600	SoyL05_01G016700	SoyL06_01G016900	SoyL07_01G017700	SoyL08_01G017500	SoyL09_01G017600	SoyC01_01G017600	SoyC02_01G016700	SoyC03_01G017500	SoyC04_01G017800	SoyC05_01G018000	SoyC06_01G017400	SoyC07_01G017000	SoyC08_01G016500	SoyC09_01G017400	SoyC10_01G017200	SoyC11_01G017000	SoyC12_01G016900	SoyC13_01G017600	SoyC14_01G017300
SoyW01_01G018000	SoyW02_01G017600	SoyW03_01G017500	SoyL01_01G016800	SoyL02_01G016800	SoyL03_01G017200	SoyL04_01G017800	SoyL05_01G016800	SoyL06_01G017000	SoyL07_01G017800	SoyL08_01G017600	SoyL09_01G017700	SoyC01_01G017700	SoyC02_01G016800	SoyC03_01G017600	SoyC04_01G017900	SoyC05_01G018100	SoyC06_01G017500	SoyC07_01G017100	SoyC08_01G016600	SoyC09_01G017500	SoyC10_01G017300	SoyC11_01G017100	SoyC12_01G017000	SoyC13_01G017700	SoyC14_01G017400
SoyW01_01G018100	SoyW02_01G017700	SoyW03_01G017600	SoyL01_01G016900	SoyL02_01G016700	SoyL03_01G017300	SoyL04_01G017900	SoyL05_01G016900	SoyL06_01G017100	SoyL07_01G017900	SoyL08_01G017700	SoyL09_01G017800	SoyC01_01G017800	SoyC02_01G016900	SoyC03_01G017700	SoyC04_01G018000	SoyC05_01G018200	SoyC06_01G017600	SoyC07_01G017200	SoyC08_01G016700	.	SoyC10_01G017400	SoyC11_01G017200	SoyC12_01G017100	SoyC13_01G017800	SoyC14_01G017500
SoyW01_01G018200	SoyW02_01G017800	SoyW03_01G017700	SoyL01_01G017000	SoyL02_01G016900	SoyL03_01G017400	SoyL04_01G018000	SoyL05_01G017000	SoyL06_01G017200	SoyL07_01G018000	SoyL08_01G017800	SoyL09_01G017900	SoyC01_01G017900	SoyC02_01G017000	SoyC03_01G017800	SoyC04_01G018100	SoyC05_01G018300	SoyC06_01G017700	SoyC07_01G017300	SoyC08_01G016800	SoyC09_01G017700	SoyC10_01G017500	SoyC11_01G017300	SoyC12_01G017200	SoyC13_01G017900	SoyC14_01G017600
SoyW01_01G018300	SoyW02_01G017900	SoyW03_01G017800	SoyL01_01G017100	SoyL02_01G017000	SoyL03_01G017500	SoyL04_01G018100	SoyL05_01G017100	SoyL06_01G017300	SoyL07_01G018100	SoyL08_01G017900	SoyL09_01G018000	SoyC01_01G018000	SoyC02_01G017100	SoyC03_01G017900	SoyC04_01G018200	SoyC05_01G018400	SoyC06_01G017800	SoyC07_01G017400	SoyC08_01G016900	SoyC09_01G017800	SoyC10_01G017600	SoyC11_01G017400	SoyC12_01G017300	SoyC13_01G018000	SoyC14_01G017700
SoyW01_01G018400	SoyW02_01G018000	SoyW03_01G017900	SoyL01_01G017200	SoyL02_01G017100	SoyL03_01G017600	SoyL04_01G018200	SoyL05_01G017200	SoyL06_01G017400	SoyL07_01G018200	SoyL08_01G018000	SoyL09_01G018100	SoyC01_01G018100	.	SoyC03_01G018000	SoyC04_01G018300	SoyC05_01G018500	SoyC06_01G017900	SoyC07_01G017500	SoyC08_01G017000	SoyC09_01G017900	SoyC10_01G017700	SoyC11_01G017500	SoyC12_01G017400	SoyC13_01G018100	SoyC14_01G017800
SoyW01_01G018500	SoyW02_01G018100	SoyW03_01G018000	SoyL01_01G017300	SoyL02_01G017200	SoyL03_01G017700	SoyL04_01G018300	SoyL05_01G017300	SoyL06_01G017500	SoyL07_01G018300	SoyL08_01G018100	SoyL09_01G018200	SoyC01_01G018200	SoyC02_01G017200	SoyC03_01G018100	SoyC04_01G018400	SoyC05_01G018600	SoyC06_01G018000	SoyC07_01G017600	SoyC08_01G017100	SoyC09_01G018000	SoyC10_01G017800	SoyC11_01G017600	SoyC12_01G017500	SoyC13_01G018200	SoyC14_01G017900
SoyW01_01G018600	SoyW02_01G018200	SoyW03_01G018100	.	SoyL02_01G017300	SoyL03_01G017800	SoyL04_01G018400	SoyL05_01G017400	.	SoyL07_01G018400	SoyL08_01G018200	SoyL09_01G018300	SoyC01_01G018300	SoyC02_01G017300	.	.	SoyC05_01G018700	SoyC06_01G018100	SoyC07_01G017700	.	SoyC09_01G018100	SoyC10_01G017900	SoyC11_01G017700	SoyC12_01G017600	SoyC13_01G018300	.
SoyW01_01G018700	SoyW02_01G018300	SoyW03_01G018200	SoyL01_01G017400	SoyL02_01G017400	SoyL03_01G017900	SoyL04_01G018500	SoyL05_01G017500	SoyL06_01G017700	SoyL07_01G018500	SoyL08_01G018300	SoyL09_01G018400	SoyC01_01G018400	SoyC02_01G017400	SoyC03_01G018200	SoyC04_01G018500	SoyC05_01G018800	SoyC06_01G018200	SoyC07_01G017800	SoyC08_01G017300	SoyC09_01G018200	SoyC10_01G018000	SoyC11_01G017800	SoyC12_01G017700	SoyC13_01G018400	SoyC14_01G018100
SoyW01_01G018800	SoyW02_01G018400	SoyW03_01G018300	SoyL01_01G017500	SoyL02_01G017500	SoyL03_01G018000	SoyL04_01G018600	SoyL05_01G017600	SoyL06_01G017800	SoyL07_01G018600	SoyL08_01G018400	SoyL09_01G018500	SoyC01_01G018500	SoyC02_01G017500	SoyC03_01G018300	SoyC04_01G018600	SoyC05_01G018900	SoyC06_01G018300	SoyC07_01G017900	SoyC08_01G017400	SoyC09_01G018300	SoyC10_01G018100	SoyC11_01G018000	SoyC12_01G017800	SoyC13_01G018500	SoyC14_01G018200
SoyW01_01G018900	SoyW02_01G018500	SoyW03_01G018400	SoyL01_01G017600	SoyL02_01G017600	SoyL03_01G018100	SoyL04_01G018700	SoyL05_01G017700	SoyL06_01G017900	SoyL07_01G018700	SoyL08_01G018500	SoyL09_01G018600	SoyC01_01G018600	SoyC02_01G017600	SoyC03_01G018400	.	SoyC05_01G019000	SoyC06_01G018400	SoyC07_01G018000	SoyC08_01G017500	SoyC09_01G018400	SoyC10_01G018200	SoyC11_01G018100	SoyC12_01G017900	SoyC13_01G018600	SoyC14_01G018300
SoyW01_01G019000	SoyW02_01G018600	SoyW03_01G018500	SoyL01_01G017700	SoyL02_01G017700	SoyL03_01G018200	SoyL04_01G018800	SoyL05_01G017800	SoyL06_01G018000	SoyL07_01G018800	SoyL08_01G018600	SoyL09_01G018700	SoyC01_01G018700	SoyC02_01G017700	SoyC03_01G018500	SoyC04_01G018700	SoyC05_01G019100	SoyC06_01G018500	SoyC07_01G018100	SoyC08_01G017600	SoyC09_01G018500	SoyC10_01G018300	SoyC11_01G018200	SoyC12_01G018000	SoyC13_01G018700	SoyC14_01G018400
SoyW01_01G019100	SoyW02_01G018700	SoyW03_01G018600	SoyL01_01G017800	SoyL02_01G017800	SoyL03_01G018300	SoyL04_01G018900	SoyL05_01G017900	SoyL06_01G018100	SoyL07_01G018900	SoyL08_01G018700	SoyL09_01G018800	SoyC01_01G018800	SoyC02_01G017800	SoyC03_01G018600	SoyC04_01G018800	SoyC05_01G019200	SoyC06_01G018600	SoyC07_01G018200	SoyC08_01G017700	SoyC09_01G018600	SoyC10_01G018400	SoyC11_01G018300	SoyC12_01G018100	SoyC13_01G018800	SoyC14_01G018500
SoyW01_01G019200	SoyW02_01G018800	SoyW03_01G018700	SoyL01_01G017900	SoyL02_01G017900	SoyL03_01G018400	SoyL04_01G019000	SoyL05_01G018000	SoyL06_01G018200	SoyL07_01G019000	SoyL08_01G018800	SoyL09_01G018900	SoyC01_01G018900	SoyC02_01G017900	SoyC03_01G018700	SoyC04_01G018900	SoyC05_01G019300	SoyC06_01G018700	SoyC07_01G018300	SoyC08_01G017800	SoyC09_01G018700	SoyC10_01G018500	SoyC11_01G018400	SoyC12_01G018200	SoyC13_01G018900	SoyC14_01G018600
SoyW01_01G019300	SoyW02_01G018900	SoyW03_01G018800	SoyL01_01G018000	SoyL02_01G018000	SoyL03_01G018500	SoyL04_01G019100	SoyL05_01G018100	SoyL06_01G018300	SoyL07_01G019100	SoyL08_01G018900	SoyL09_01G019000	SoyC01_01G019000	SoyC02_01G018000	SoyC03_01G018800	SoyC04_01G019000	SoyC05_01G019400	SoyC06_01G018800	SoyC07_01G018400	SoyC08_01G017900	SoyC09_01G018800	SoyC10_01G018600	SoyC11_01G018500	SoyC12_01G018300	SoyC13_01G019000	SoyC14_01G018700
SoyW01_01G019400	SoyW02_01G019000	SoyW03_01G018900	SoyL01_01G018100	SoyL02_01G018100	SoyL03_01G018600	SoyL04_01G019200	SoyL05_01G018200	SoyL06_01G018400	SoyL07_01G019200	SoyL08_01G019000	SoyL09_01G019100	SoyC01_01G019100	SoyC02_01G018100	SoyC03_01G018900	SoyC04_01G019100	SoyC05_01G019600	SoyC06_01G018900	SoyC07_01G018500	SoyC08_01G018000	SoyC09_01G018900	SoyC10_01G018700	SoyC11_01G018600	SoyC12_01G018400	SoyC13_01G019100	SoyC14_01G018800
SoyW01_01G019500	SoyW02_01G019100	SoyW03_01G019000	SoyL01_01G018200	SoyL02_01G018200	SoyL03_01G018700	SoyL04_01G019300	SoyL05_01G018300	SoyL06_01G018500	SoyL07_01G019300	SoyL08_01G019100	SoyL09_01G019200	SoyC01_01G019200	SoyC02_01G018200	SoyC03_01G019000	SoyC04_01G019200	SoyC05_01G019700	SoyC06_01G019000	SoyC07_01G018600	SoyC08_01G018100	SoyC09_01G019000	SoyC10_01G018800	SoyC11_01G018700	SoyC12_01G018500	SoyC13_01G019200	SoyC14_01G018900
SoyW01_01G019600	SoyW02_01G019200	SoyW03_01G019100	SoyL01_01G018300	SoyL02_01G018300	SoyL03_01G018800	SoyL04_01G019400	SoyL05_01G018400	SoyL06_01G018600	SoyL07_01G019400	SoyL08_01G019200	SoyL09_01G019300	SoyC01_01G019300	SoyC02_01G018300	SoyC03_01G019100	SoyC04_01G019300	SoyC05_01G019800	SoyC06_01G019100	SoyC07_01G018700	SoyC08_01G018200	SoyC09_01G019100	SoyC10_01G018900	SoyC11_01G018800	SoyC12_01G018600	SoyC13_01G019300	SoyC14_01G019100
SoyW01_01G019700	SoyW02_01G019300	SoyW03_01G019200	.	SoyL02_01G018400	SoyL03_01G018900	.	.	SoyL06_01G018700	SoyL07_01G019500	SoyL08_01G019300	SoyL09_01G019400	.	SoyC02_01G018400	SoyC03_01G019200	SoyC04_01G019400	SoyC05_01G020000	.	SoyC07_01G018800	SoyC08_01G018350	SoyC09_01G019400	.	SoyC11_01G018900	SoyC12_01G018800	.	SoyC14_01G019200
SoyW01_01G019800	SoyW02_01G019400	.	.	SoyL02_01G018500	SoyL03_01G019000	.	.	SoyL06_01G018800	.	SoyL08_01G019400	SoyL09_01G019500	SoyC01_01G019400	.	SoyC03_01G019300	SoyC04_01G019500	SoyC05_01G019900	.	SoyC07_01G018900	SoyC08_01G018300	SoyC09_01G019300	SoyC10_01G019000	SoyC11_01G019000	SoyC12_01G018700	.	.
SoyW01_01G019900	.	SoyW03_01G019300	SoyL01_01G018400	.	.	SoyL04_01G019500	.	.	SoyL07_01G019600	.	.	.	SoyC02_01G018500	.	.	.	SoyC06_01G019300	.	.	.	.	.	.	.	SoyC14_01G019300
SoyW01_01G020000	SoyW02_01G019500	SoyW03_01G019400	SoyL01_01G018500	SoyL02_01G018600	.	SoyL04_01G019600	SoyL05_01G018700	SoyL06_01G018900	SoyL07_01G019700	SoyL08_01G019500	SoyL09_01G019600	SoyC01_01G019500	SoyC02_01G018600	SoyC03_01G019400	SoyC04_01G019600	SoyC05_01G020100	SoyC06_01G019200	.	SoyC08_01G018400	SoyC09_01G019500	SoyC10_01G019100	SoyC11_01G019100	.	SoyC13_01G019700	SoyC14_01G019400
SoyW01_01G020100	SoyW02_01G019600	SoyW03_01G019500	SoyL01_01G018600	SoyL02_01G018700	SoyL03_01G019100	SoyL04_01G019700	SoyL05_01G018800	SoyL06_01G019000	SoyL07_01G019800	SoyL08_01G019600	SoyL09_01G019700	SoyC01_01G019600	SoyC02_01G018700	SoyC03_01G019500	SoyC04_01G019700	SoyC05_01G020200	SoyC06_01G019400	SoyC07_01G019000	SoyC08_01G018500	SoyC09_01G019600	SoyC10_01G019200	SoyC11_01G019200	SoyC12_01G018900	SoyC13_01G019800	SoyC14_01G019500
SoyW01_01G020250	SoyW02_01G019700	SoyW03_01G019650	SoyL01_01G018700	SoyL02_01G018800	SoyL03_01G019200	SoyL04_01G019800	SoyL05_01G018900	SoyL06_01G019100	SoyL07_01G019900	SoyL08_01G019700	SoyL09_01G019800	SoyC01_01G019700	SoyC02_01G018800	SoyC03_01G019600	SoyC04_01G019850	SoyC05_01G020300	SoyC06_01G019500	SoyC07_01G019100	SoyC08_01G018600	SoyC09_01G019700	SoyC10_01G019300	SoyC11_01G019300	SoyC12_01G019000	SoyC13_01G019900	SoyC14_01G019600
SoyW01_01G020400	SoyW02_01G019900	SoyW03_01G019900	SoyL01_01G018900	SoyL02_01G019100	SoyL03_01G019400	SoyL04_01G020000	SoyL05_01G019100	SoyL06_01G019300	SoyL07_01G020100	SoyL08_01G020000	SoyL09_01G020000	SoyC01_01G020000	SoyC02_01G019000	SoyC03_01G019800	SoyC04_01G020100	SoyC05_01G020500	SoyC06_01G019700	SoyC07_01G019300	SoyC08_01G018900	SoyC09_01G019900	SoyC10_01G019500	SoyC11_01G019500	SoyC12_01G019200	SoyC13_01G020100	SoyC14_01G019800
SoyW01_01G020500	SoyW02_01G019800	SoyW03_01G019800	SoyL01_01G018800	SoyL02_01G019000	SoyL03_01G019300	SoyL04_01G019900	SoyL05_01G019000	SoyL06_01G019200	SoyL07_01G020000	SoyL08_01G019900	SoyL09_01G019900	SoyC01_01G019900	SoyC02_01G018900	SoyC03_01G019700	SoyC04_01G020000	SoyC05_01G020400	SoyC06_01G019600	SoyC07_01G019200	SoyC08_01G018800	SoyC09_01G019800	SoyC10_01G019400	SoyC11_01G019400	SoyC12_01G019100	SoyC13_01G020000	SoyC14_01G019700
SoyW01_01G020600	SoyW02_01G020000	SoyW03_01G020000	SoyL01_01G019000	SoyL02_01G019200	SoyL03_01G019500	SoyL04_01G020100	SoyL05_01G019200	SoyL06_01G019400	SoyL07_01G020200	SoyL08_01G020100	SoyL09_01G020100	SoyC01_01G020100	SoyC02_01G019100	SoyC03_01G019900	SoyC04_01G020200	SoyC05_01G020600	SoyC06_01G019800	SoyC07_01G019400	SoyC08_01G019000	SoyC09_01G020000	SoyC10_01G019600	.	SoyC12_01G019300	SoyC13_01G020200	SoyC14_01G019900
SoyW01_01G020700	SoyW02_01G020400	SoyW03_01G020400	SoyL01_01G019400	SoyL02_01G019600	SoyL03_01G019900	SoyL04_01G020500	SoyL05_01G019600	SoyL06_01G019800	SoyL07_01G020600	SoyL08_01G020600	SoyL09_01G020600	SoyC01_01G020400	SoyC02_01G019500	SoyC03_01G020300	SoyC04_01G020600	SoyC05_01G021000	SoyC06_01G020200	SoyC07_01G019800	SoyC08_01G019300	SoyC09_01G020400	SoyC10_01G020000	SoyC11_01G020000	SoyC12_01G019700	SoyC13_01G020600	SoyC14_01G020300
SoyW01_01G020800	.	.	.	.	.	.	.	.	.	.	.	.	.	.	.	.	.	.	.	.	.	.	.	.	.
SoyW01_01G020900	SoyW02_01G020300	SoyW03_01G020300	SoyL01_01G019300	SoyL02_01G019500	SoyL03_01G019800	SoyL04_01G020400	SoyL05_01G019500	SoyL06_01G019700	SoyL07_01G020500	SoyL08_01G020400	SoyL09_01G020400	SoyC01_01G020350	SoyC02_01G019400	SoyC03_01G020200	SoyC04_01G020500	SoyC05_01G020900	SoyC06_01G020100	SoyC07_01G019700	SoyC08_01G019250	SoyC09_01G020300	SoyC10_01G019900	SoyC11_01G019900	SoyC12_01G019600	SoyC13_01G020500	SoyC14_01G020200
SoyW01_01G021000	SoyW02_01G020100	SoyW03_01G020100	SoyL01_01G019100	SoyL02_01G019300	SoyL03_01G019600	SoyL04_01G020200	SoyL05_01G019300	SoyL06_01G019500	SoyL07_01G020300	SoyL08_01G020200	SoyL09_01G020200	SoyC01_01G020200	SoyC02_01G019200	SoyC03_01G020000	SoyC04_01G020300	SoyC05_01G020700	SoyC06_01G019900	SoyC07_01G019500	SoyC08_01G019100	SoyC09_01G020100	SoyC10_01G019700	SoyC11_01G019700	SoyC12_01G019400	SoyC13_01G020300	SoyC14_01G020000
SoyW01_01G021100	SoyW02_01G020500	SoyW03_01G020500	SoyL01_01G019500	SoyL02_01G019700	SoyL03_01G020000	SoyL04_01G020600	SoyL05_01G019700	SoyL06_01G019900	SoyL07_01G020700	SoyL08_01G020700	SoyL09_01G020700	SoyC01_01G020500	SoyC02_01G019600	SoyC03_01G020400	SoyC04_01G020700	SoyC05_01G021100	SoyC06_01G020300	SoyC07_01G019900	SoyC08_01G019400	SoyC09_01G020500	SoyC10_01G020100	SoyC11_01G020100	SoyC12_01G019800	SoyC13_01G020700	SoyC14_01G020400
SoyW01_01G021200	SoyW02_01G020600	SoyW03_01G020600	SoyL01_01G019600	SoyL02_01G019800	SoyL03_01G020100	SoyL04_01G020700	SoyL05_01G019800	SoyL06_01G020000	SoyL07_01G020800	SoyL08_01G020800	SoyL09_01G020800	SoyC01_01G020600	SoyC02_01G019700	SoyC03_01G020500	SoyC04_01G020800	SoyC05_01G021200	SoyC06_01G020400	SoyC07_01G020000	SoyC08_01G019500	SoyC09_01G020600	SoyC10_01G020200	SoyC11_01G020200	SoyC12_01G019900	SoyC13_01G020800	SoyC14_01G020500
SoyW01_01G021300	SoyW02_01G020700	SoyW03_01G020700	SoyL01_01G019700	SoyL02_01G019900	SoyL03_01G020200	SoyL04_01G020800	SoyL05_01G019900	SoyL06_01G020100	SoyL07_01G020900	SoyL08_01G020900	SoyL09_01G020900	SoyC01_01G020700	SoyC02_01G019800	SoyC03_01G020600	SoyC04_01G020900	SoyC05_01G021300	SoyC06_01G020500	SoyC07_01G020100	SoyC08_01G019600	SoyC09_01G020700	SoyC10_01G020300	SoyC11_01G020300	SoyC12_01G020000	SoyC13_01G020900	SoyC14_01G020600
SoyW01_01G021400	SoyW02_01G020800	SoyW03_01G020800	SoyL01_01G019800	SoyL02_01G020000	SoyL03_01G020300	SoyL04_01G020900	SoyL05_01G020000	SoyL06_01G020200	SoyL07_01G021000	SoyL08_01G021000	SoyL09_01G021000	SoyC01_01G020800	SoyC02_01G019900	SoyC03_01G020700	SoyC04_01G021000	SoyC05_01G021400	SoyC06_01G020600	SoyC07_01G020200	SoyC08_01G019700	SoyC09_01G020800	SoyC10_01G020400	SoyC11_01G020400	SoyC12_01G020100	SoyC13_01G021000	SoyC14_01G020700
SoyW01_01G021500	SoyW02_01G020900	SoyW03_01G020900	SoyL01_01G019900	SoyL02_01G020100	SoyL03_01G020400	SoyL04_01G021000	SoyL05_01G020100	SoyL06_01G020300	SoyL07_01G021100	SoyL08_01G021100	SoyL09_01G021100	SoyC01_01G020900	SoyC02_01G020000	SoyC03_01G020800	SoyC04_01G021100	SoyC05_01G021500	SoyC06_01G020700	SoyC07_01G020300	SoyC08_01G019800	SoyC09_01G020900	SoyC10_01G020500	SoyC11_01G020500	SoyC12_01G020200	SoyC13_01G021100	SoyC14_01G020800
SoyW01_01G021600	SoyW02_01G021000	SoyW03_01G021000	SoyL01_01G020000	SoyL02_01G020200	SoyL03_01G020500	SoyL04_01G021100	SoyL05_01G020200	SoyL06_01G020400	SoyL07_01G021200	SoyL08_01G021200	SoyL09_01G021200	SoyC01_01G021000	SoyC02_01G020100	SoyC03_01G020900	SoyC04_01G021200	SoyC05_01G021600	SoyC06_01G020800	SoyC07_01G020400	SoyC08_01G019900	SoyC09_01G021000	SoyC10_01G020600	SoyC11_01G020600	SoyC12_01G020300	SoyC13_01G021200	SoyC14_01G020900
SoyW01_01G021700	.	SoyW03_01G021500	.	.	SoyL03_01G020600	.	SoyL05_01G020400	SoyL06_01G020500	SoyL07_01G021400	SoyL08_01G021400	SoyL09_01G021400	SoyC01_01G021600	SoyC02_01G020200	SoyC03_01G021100	SoyC04_01G021400	SoyC05_01G021800	.	SoyC07_01G020500	SoyC08_01G020400	SoyC09_01G021200	SoyC10_01G021100	.	SoyC12_01G020700	.	SoyC14_01G021500
SoyW01_01G021800	.	SoyW03_01G021100	SoyL01_01G020030	SoyL02_01G020700	.	SoyL04_01G021600	.	.	SoyL07_01G021300	SoyL08_01G021800	SoyL09_01G021600	SoyC01_01G021200	.	SoyC03_01G021000	SoyC04_01G021300	SoyC05_01G021700	.	.	SoyC08_01G020100	.	SoyC10_01G020700	.	SoyC12_01G020400	SoyC13_01G021600	SoyC14_01G021600
SoyW01_01G021900	.	SoyW03_01G021200	SoyL01_01G020100	SoyL02_01G020500	.	SoyL04_01G021400	.	.	SoyL07_01G021500	SoyL08_01G021500	SoyL09_01G021500	SoyC01_01G021400	.	SoyC03_01G021200	SoyC04_01G021500	SoyC05_01G021900	.	.	SoyC08_01G020300	.	SoyC10_01G020800	.	SoyC12_01G020500	SoyC13_01G021500	SoyC14_01G021300
SoyW01_01G022000	.	.	SoyL01_01G020070	SoyL02_01G020400	.	SoyL04_01G021300	.	.	.	.	.	.	.	.	.	.	.	.	.	.	.	.	.	SoyC13_01G021400	SoyC14_01G021100
SoyW01_01G022100	SoyW02_01G021400	SoyW03_01G021600	SoyL01_01G020200	SoyL02_01G020800	SoyL03_01G020700	SoyL04_01G021700	SoyL05_01G020600	SoyL06_01G020700	SoyL07_01G021700	SoyL08_01G021900	SoyL09_01G021700	SoyC01_01G021700	SoyC02_01G020300	SoyC03_01G021500	SoyC04_01G021700	SoyC05_01G022100	SoyC06_01G021100	SoyC07_01G020600	SoyC08_01G020500	SoyC09_01G021500	SoyC10_01G021200	SoyC11_01G020900	SoyC12_01G020800	SoyC13_01G021700	SoyC14_01G021700
SoyW01_01G022200	SoyW02_01G021500	SoyW03_01G021700	SoyL01_01G020300	SoyL02_01G020900	SoyL03_01G020800	SoyL04_01G021800	SoyL05_01G020700	SoyL06_01G020800	SoyL07_01G021800	SoyL08_01G022000	SoyL09_01G021800	SoyC01_01G021800	SoyC02_01G020400	SoyC03_01G021600	SoyC04_01G021800	SoyC05_01G022200	SoyC06_01G021200	SoyC07_01G020700	SoyC08_01G020600	SoyC09_01G021600	SoyC10_01G021300	SoyC11_01G021000	SoyC12_01G020900	SoyC13_01G021800	SoyC14_01G021800
SoyW01_01G022300	SoyW02_01G021600	SoyW03_01G021800	SoyL01_01G020400	SoyL02_01G021000	SoyL03_01G020900	SoyL04_01G021900	SoyL05_01G020800	SoyL06_01G020900	SoyL07_01G021900	SoyL08_01G022100	SoyL09_01G021900	SoyC01_01G021900	SoyC02_01G020500	SoyC03_01G021700	SoyC04_01G021900	SoyC05_01G022300	SoyC06_01G021300	SoyC07_01G020800	SoyC08_01G020700	SoyC09_01G021700	SoyC10_01G021400	SoyC11_01G021100	SoyC12_01G021000	SoyC13_01G021900	SoyC14_01G021900
SoyW01_01G022400	SoyW02_01G021700	SoyW03_01G021900	SoyL01_01G020500	SoyL02_01G021100	SoyL03_01G021000	SoyL04_01G022000	SoyL05_01G020900	SoyL06_01G021000	SoyL07_01G022000	SoyL08_01G022200	SoyL09_01G022000	SoyC01_01G022000	SoyC02_01G020600	SoyC03_01G021800	SoyC04_01G022000	SoyC05_01G022400	SoyC06_01G021400	SoyC07_01G020900	SoyC08_01G020800	SoyC09_01G021800	SoyC10_01G021500	SoyC11_01G021200	SoyC12_01G021100	SoyC13_01G022000	SoyC14_01G022000
SoyW01_01G022500	SoyW02_01G021800	SoyW03_01G022000	SoyL01_01G020600	SoyL02_01G021200	SoyL03_01G021100	SoyL04_01G022100	SoyL05_01G021000	SoyL06_01G021100	SoyL07_01G022100	SoyL08_01G022300	SoyL09_01G022100	SoyC01_01G022100	SoyC02_01G020700	SoyC03_01G021900	SoyC04_01G022100	SoyC05_01G022500	SoyC06_01G021500	SoyC07_01G021000	SoyC08_01G020900	SoyC09_01G021900	SoyC10_01G021600	SoyC11_01G021300	SoyC12_01G021200	SoyC13_01G022100	SoyC14_01G022100
SoyW01_01G022600	SoyW02_01G021900	SoyW03_01G022100	SoyL01_01G020800	SoyL02_01G021300	SoyL03_01G021200	SoyL04_01G022200	SoyL05_01G021200	SoyL06_01G021200	SoyL07_01G022200	SoyL08_01G022400	SoyL09_01G022200	SoyC01_01G022200	SoyC02_01G020800	SoyC03_01G022000	SoyC04_01G022200	SoyC05_01G022600	SoyC06_01G021600	SoyC07_01G021100	SoyC08_01G021000	SoyC09_01G022000	SoyC10_01G021700	SoyC11_01G021400	SoyC12_01G021300	SoyC13_01G022200	SoyC14_01G022300
SoyW01_01G022700	SoyW02_01G022000	SoyW03_01G022200	.	SoyL02_01G021400	SoyL03_01G021300	SoyL04_01G022300	.	SoyL06_01G021300	SoyL07_01G022300	SoyL08_01G022500	SoyL09_01G022300	SoyC01_01G022300	SoyC02_01G020900	SoyC03_01G022100	SoyC04_01G022300	SoyC05_01G022700	SoyC06_01G021700	SoyC07_01G021200	SoyC08_01G021100	SoyC09_01G022100	SoyC10_01G021800	SoyC11_01G021500	SoyC12_01G021400	SoyC13_01G022300	.
SoyW01_01G022800	.	SoyW03_01G022300	.	.	.	SoyL04_01G022400	.	SoyL06_01G021400	SoyL07_01G022400	SoyL08_01G022600	SoyL09_01G022400	.	SoyC02_01G021000	SoyC03_01G022200	SoyC04_01G022400	SoyC05_01G022800	.	.	.	.	.	SoyC11_01G021550	.	SoyC13_01G022400	.
SoyW01_01G022900	SoyW02_01G022100	SoyW03_01G022400	SoyL01_01G020900	SoyL02_01G021500	SoyL03_01G021400	SoyL04_01G022500	SoyL05_01G021300	SoyL06_01G021500	SoyL07_01G022500	SoyL08_01G022700	SoyL09_01G022500	SoyC01_01G022400	SoyC02_01G021100	SoyC03_01G022300	SoyC04_01G022500	SoyC05_01G022900	SoyC06_01G021800	SoyC07_01G021300	SoyC08_01G021200	SoyC09_01G022200	SoyC10_01G021900	SoyC11_01G021600	SoyC12_01G021500	SoyC13_01G022500	SoyC14_01G022500
SoyW01_01G023000	SoyW02_01G022200	SoyW03_01G022500	SoyL01_01G021000	SoyL02_01G021600	SoyL03_01G021500	SoyL04_01G022600	SoyL05_01G021400	SoyL06_01G021600	SoyL07_01G022600	SoyL08_01G022800	SoyL09_01G022600	SoyC01_01G022500	SoyC02_01G021200	SoyC03_01G022400	SoyC04_01G022600	SoyC05_01G023000	SoyC06_01G021900	SoyC07_01G021400	SoyC08_01G021300	SoyC09_01G022300	SoyC10_01G022000	SoyC11_01G021700	SoyC12_01G021600	SoyC13_01G022600	SoyC14_01G022600
SoyW01_01G023100	SoyW02_01G022300	SoyW03_01G022600	SoyL01_01G021100	SoyL02_01G021700	SoyL03_01G021600	SoyL04_01G022700	SoyL05_01G021500	SoyL06_01G021700	SoyL07_01G022700	SoyL08_01G022900	SoyL09_01G022700	SoyC01_01G022600	SoyC02_01G021300	SoyC03_01G022500	SoyC04_01G022700	SoyC05_01G023100	SoyC06_01G022000	SoyC07_01G021500	SoyC08_01G021400	SoyC09_01G022400	SoyC10_01G022100	SoyC11_01G021800	SoyC12_01G021700	SoyC13_01G022700	SoyC14_01G022700
SoyW01_01G023200	SoyW02_01G022400	SoyW03_01G022700	SoyL01_01G021200	SoyL02_01G021800	SoyL03_01G021700	SoyL04_01G022800	.	SoyL06_01G021800	SoyL07_01G022800	SoyL08_01G023000	SoyL09_01G022800	SoyC01_01G022700	SoyC02_01G021400	SoyC03_01G022600	SoyC04_01G022800	SoyC05_01G023200	SoyC06_01G022100	SoyC07_01G021600	SoyC08_01G021500	SoyC09_01G022500	SoyC10_01G022200	SoyC11_01G021900	SoyC12_01G021800	SoyC13_01G022800	SoyC14_01G022800
SoyW01_01G023300	SoyW02_01G022500	SoyW03_01G022800	SoyL01_01G021300	SoyL02_01G021900	SoyL03_01G021800	SoyL04_01G022900	SoyL05_01G021600	SoyL06_01G021900	SoyL07_01G022900	SoyL08_01G023100	SoyL09_01G022900	SoyC01_01G022800	SoyC02_01G021500	SoyC03_01G022700	SoyC04_01G022900	SoyC05_01G023300	SoyC06_01G022200	SoyC07_01G021700	SoyC08_01G021600	SoyC09_01G022600	SoyC10_01G022300	SoyC11_01G022000	SoyC12_01G021900	SoyC13_01G022900	SoyC14_01G022900
SoyW01_01G023400	SoyW02_01G022600	SoyW03_01G022900	SoyL01_01G021400	SoyL02_01G022000	SoyL03_01G021900	SoyL04_01G023000	SoyL05_01G021700	SoyL06_01G022000	SoyL07_01G023000	SoyL08_01G023200	SoyL09_01G023000	SoyC01_01G022900	SoyC02_01G021600	SoyC03_01G022800	SoyC04_01G023000	SoyC05_01G023400	SoyC06_01G022300	SoyC07_01G021800	SoyC08_01G021700	SoyC09_01G022700	SoyC10_01G022400	SoyC11_01G022100	SoyC12_01G022000	SoyC13_01G023000	SoyC14_01G023000
SoyW01_01G023500	SoyW02_01G022700	SoyW03_01G023000	SoyL01_01G021500	SoyL02_01G022100	SoyL03_01G022000	SoyL04_01G023100	SoyL05_01G021800	SoyL06_01G022100	SoyL07_01G023100	SoyL08_01G023300	SoyL09_01G023100	SoyC01_01G023000	SoyC02_01G021700	SoyC03_01G022900	SoyC04_01G023100	SoyC05_01G023500	SoyC06_01G022400	SoyC07_01G021900	SoyC08_01G021800	SoyC09_01G022800	SoyC10_01G022500	SoyC11_01G022200	SoyC12_01G022100	SoyC13_01G023100	SoyC14_01G023100
SoyW01_01G023600	SoyW02_01G022800	SoyW03_01G023100	SoyL01_01G021600	SoyL02_01G022200	SoyL03_01G022100	SoyL04_01G023200	SoyL05_01G021900	SoyL06_01G022200	SoyL07_01G023200	SoyL08_01G023400	SoyL09_01G023200	SoyC01_01G023100	.	SoyC03_01G023000	SoyC04_01G023200	SoyC05_01G023600	SoyC06_01G022500	SoyC07_01G022000	SoyC08_01G021900	SoyC09_01G022900	SoyC10_01G022600	SoyC11_01G022300	SoyC12_01G022200	SoyC13_01G023200	SoyC14_01G023200
SoyW01_01G023700	.	.	.	.	.	.	.	.	.	.	.	.	.	.	.	.	.	.	.	.	.	.	.	.	.
SoyW01_01G023800	SoyW02_01G022900	SoyW03_01G023200	SoyL01_01G021700	SoyL02_01G022300	SoyL03_01G022200	SoyL04_01G023300	SoyL05_01G022000	SoyL06_01G022300	SoyL07_01G023300	SoyL08_01G023500	SoyL09_01G023300	SoyC01_01G023200	SoyC02_01G021800	SoyC03_01G023100	SoyC04_01G023300	SoyC05_01G023700	SoyC06_01G022600	SoyC07_01G022100	SoyC08_01G022000	SoyC09_01G023000	SoyC10_01G022700	SoyC11_01G022400	SoyC12_01G022300	SoyC13_01G023300	SoyC14_01G023300
SoyW01_01G023900	SoyW02_01G023000	SoyW03_01G023300	SoyL01_01G021800	SoyL02_01G022400	SoyL03_01G022300	SoyL04_01G023400	SoyL05_01G022100	SoyL06_01G022400	SoyL07_01G023400	SoyL08_01G023600	SoyL09_01G023400	SoyC01_01G023300	SoyC02_01G021900	SoyC03_01G023200	SoyC04_01G023400	SoyC05_01G023800	SoyC06_01G022700	SoyC07_01G022200	SoyC08_01G022100	SoyC09_01G023100	SoyC10_01G022800	SoyC11_01G022500	SoyC12_01G022400	SoyC13_01G023400	SoyC14_01G023400
SoyW01_01G024000	SoyW02_01G023100	SoyW03_01G023400	SoyL01_01G021900	SoyL02_01G022500	SoyL03_01G022400	SoyL04_01G023500	SoyL05_01G022200	SoyL06_01G022500	SoyL07_01G023500	SoyL08_01G023700	SoyL09_01G023500	SoyC01_01G023400	SoyC02_01G022000	SoyC03_01G023300	SoyC04_01G023500	SoyC05_01G023900	SoyC06_01G022800	SoyC07_01G022300	SoyC08_01G022200	SoyC09_01G023200	SoyC10_01G022900	SoyC11_01G022600	SoyC12_01G022500	SoyC13_01G023500	SoyC14_01G023500
SoyW01_01G024100	SoyW02_01G023400	SoyW03_01G023700	SoyL01_01G022200	SoyL02_01G022800	SoyL03_01G022700	SoyL04_01G023800	SoyL05_01G022500	SoyL06_01G022800	SoyL07_01G023800	SoyL08_01G024000	SoyL09_01G023800	SoyC01_01G023700	SoyC02_01G022300	SoyC03_01G023600	SoyC04_01G023800	SoyC05_01G024200	SoyC06_01G023100	SoyC07_01G022600	SoyC08_01G022500	SoyC09_01G023500	SoyC10_01G023200	SoyC11_01G022900	SoyC12_01G022800	SoyC13_01G023800	SoyC14_01G023800
SoyW01_01G024200	SoyW02_01G023300	SoyW03_01G023600	SoyL01_01G022100	SoyL02_01G022700	SoyL03_01G022600	SoyL04_01G023700	SoyL05_01G022400	SoyL06_01G022700	SoyL07_01G023700	SoyL08_01G023900	SoyL09_01G023700	SoyC01_01G023600	SoyC02_01G022200	SoyC03_01G023500	SoyC04_01G023700	SoyC05_01G024100	SoyC06_01G023000	SoyC07_01G022500	SoyC08_01G022400	SoyC09_01G023400	SoyC10_01G023100	SoyC11_01G022800	SoyC12_01G022700	SoyC13_01G023700	SoyC14_01G023700
SoyW01_01G024300	SoyW02_01G023200	SoyW03_01G023500	SoyL01_01G022000	SoyL02_01G022600	SoyL03_01G022500	SoyL04_01G023600	SoyL05_01G022300	SoyL06_01G022600	SoyL07_01G023600	SoyL08_01G023800	SoyL09_01G023600	SoyC01_01G023500	SoyC02_01G022100	SoyC03_01G023400	SoyC04_01G023600	SoyC05_01G024000	SoyC06_01G022900	SoyC07_01G022400	SoyC08_01G022300	SoyC09_01G023300	SoyC10_01G023000	SoyC11_01G022700	SoyC12_01G022600	SoyC13_01G023600	SoyC14_01G023600
SoyW01_01G024400	SoyW02_01G023600	SoyW03_01G024000	SoyL01_01G022500	.	.	SoyL04_01G024000	.	.	SoyL07_01G024000	SoyL08_01G024200	SoyL09_01G024000	.	SoyC02_01G022500	SoyC03_01G023900	SoyC04_01G024000	SoyC05_01G024400	.	.	.	SoyC09_01G023800	SoyC10_01G023400	SoyC11_01G023200	.	SoyC13_01G024100	.
SoyW01_01G024500	.	.	.	.	.	.	.	.	.	.	.	.	.	.	.	.	.	.	.	.	.	.	.	.	.
SoyW01_01G024600	SoyW02_01G023500	SoyW03_01G023900	SoyL01_01G022400	SoyL02_01G022900	SoyL03_01G022800	SoyL04_01G024100	SoyL05_01G022600	SoyL06_01G022900	SoyL07_01G024100	SoyL08_01G024300	SoyL09_01G024100	SoyC01_01G023800	SoyC02_01G022600	SoyC03_01G023800	SoyC04_01G024100	SoyC05_01G024500	SoyC06_01G023200	SoyC07_01G022700	SoyC08_01G022600	SoyC09_01G023700	SoyC10_01G023500	SoyC11_01G023100	SoyC12_01G022900	SoyC13_01G024000	SoyC14_01G023900
SoyW01_01G024700	SoyW02_01G023700	SoyW03_01G024100	SoyL01_01G022600	SoyL02_01G023000	SoyL03_01G022900	SoyL04_01G024200	SoyL05_01G022700	SoyL06_01G023000	SoyL07_01G024200	SoyL08_01G024400	SoyL09_01G024200	SoyC01_01G023900	SoyC02_01G022700	SoyC03_01G024000	SoyC04_01G024200	SoyC05_01G024600	SoyC06_01G023300	SoyC07_01G022800	SoyC08_01G022700	SoyC09_01G023900	SoyC10_01G023600	SoyC11_01G023300	SoyC12_01G023000	SoyC13_01G024200	SoyC14_01G024000
SoyW01_01G024800	SoyW02_01G023800	SoyW03_01G024200	SoyL01_01G022700	SoyL02_01G023100	SoyL03_01G023000	SoyL04_01G024300	SoyL05_01G022800	SoyL06_01G023100	SoyL07_01G024300	SoyL08_01G024500	SoyL09_01G024300	SoyC01_01G024000	SoyC02_01G022800	SoyC03_01G024100	SoyC04_01G024300	SoyC05_01G024700	SoyC06_01G023400	SoyC07_01G022900	SoyC08_01G022800	SoyC09_01G024000	SoyC10_01G023700	SoyC11_01G023400	SoyC12_01G023100	SoyC13_01G024300	SoyC14_01G024100
SoyW01_01G024900	SoyW02_01G023900	SoyW03_01G024300	SoyL01_01G022800	SoyL02_01G023200	SoyL03_01G023100	SoyL04_01G024400	SoyL05_01G022900	SoyL06_01G023200	SoyL07_01G024400	SoyL08_01G024600	SoyL09_01G024400	SoyC01_01G024100	SoyC02_01G022900	SoyC03_01G024200	SoyC04_01G024400	SoyC05_01G024800	SoyC06_01G023500	SoyC07_01G023000	SoyC08_01G022900	SoyC09_01G024100	SoyC10_01G023800	SoyC11_01G023500	SoyC12_01G023200	SoyC13_01G024400	SoyC14_01G024200
SoyW01_01G025000	SoyW02_01G024000	SoyW03_01G024400	SoyL01_01G022900	SoyL02_01G023300	.	SoyL04_01G024500	SoyL05_01G023000	SoyL06_01G023300	SoyL07_01G024500	SoyL08_01G024700	SoyL09_01G024500	SoyC01_01G024200	SoyC02_01G023000	SoyC03_01G024300	SoyC04_01G024500	SoyC05_01G024900	SoyC06_01G023600	SoyC07_01G023100	SoyC08_01G023000	SoyC09_01G024200	SoyC10_01G023900	SoyC11_01G023600	SoyC12_01G023300	SoyC13_01G024500	SoyC14_01G024300
SoyW01_01G025100	SoyW02_01G024900	SoyW03_01G025400	SoyL01_01G023900	SoyL02_01G024200	SoyL03_01G024300	SoyL04_01G025600	SoyL05_01G024000	SoyL06_01G024600	SoyL07_01G025800	SoyL08_01G025700	SoyL09_01G025600	SoyC01_01G025300	SoyC02_01G024000	SoyC03_01G025300	SoyC04_01G025600	SoyC05_01G025900	SoyC06_01G024600	SoyC07_01G024100	SoyC08_01G024000	SoyC09_01G025200	SoyC10_01G024900	SoyC11_01G024600	SoyC12_01G024300	SoyC13_01G025800	SoyC14_01G025600
SoyW01_01G025200	SoyW02_01G024200	SoyW03_01G024600	SoyL01_01G023100	SoyL02_01G023500	SoyL03_01G023500	SoyL04_01G024800	SoyL05_01G023200	SoyL06_01G023800	SoyL07_01G025000	SoyL08_01G024900	SoyL09_01G024800	SoyC01_01G024500	SoyC02_01G023200	SoyC03_01G024500	SoyC04_01G024700	SoyC05_01G025100	SoyC06_01G023800	SoyC07_01G023300	SoyC08_01G023200	SoyC09_01G024400	SoyC10_01G024100	SoyC11_01G023800	SoyC12_01G023500	SoyC13_01G024900	SoyC14_01G024700
SoyW01_01G025300	SoyW02_01G024300	SoyW03_01G024700	SoyL01_01G023200	SoyL02_01G023600	SoyL03_01G023600	SoyL04_01G024900	SoyL05_01G023300	SoyL06_01G023900	SoyL07_01G025100	SoyL08_01G025000	SoyL09_01G024900	SoyC01_01G024600	SoyC02_01G023300	SoyC03_01G024600	SoyC04_01G024800	SoyC05_01G025200	SoyC06_01G023900	SoyC07_01G023400	SoyC08_01G023300	SoyC09_01G024500	SoyC10_01G024200	SoyC11_01G023900	SoyC12_01G023600	SoyC13_01G025000	SoyC14_01G024800
SoyW01_01G025400	SoyW02_01G024400	SoyW03_01G024800	SoyL01_01G023300	SoyL02_01G023700	SoyL03_01G023700	SoyL04_01G025000	SoyL05_01G023400	SoyL06_01G024000	SoyL07_01G025200	SoyL08_01G025100	SoyL09_01G025000	SoyC01_01G024700	SoyC02_01G023400	SoyC03_01G024700	SoyC04_01G024900	SoyC05_01G025300	SoyC06_01G024000	SoyC07_01G023500	SoyC08_01G023400	SoyC09_01G024600	SoyC10_01G024300	SoyC11_01G024000	SoyC12_01G023700	SoyC13_01G025200	SoyC14_01G025000
SoyW01_01G025500	.	SoyW03_01G024900	SoyL01_01G023400	SoyL02_01G023800	SoyL03_01G023800	SoyL04_01G025100	SoyL05_01G023500	SoyL06_01G024100	SoyL07_01G025300	SoyL08_01G025200	SoyL09_01G025100	SoyC01_01G024800	SoyC02_01G023500	SoyC03_01G024800	SoyC04_01G025000	SoyC05_01G025400	SoyC06_01G024100	SoyC07_01G023600	SoyC08_01G023500	SoyC09_01G024700	SoyC10_01G024400	SoyC11_01G024100	SoyC12_01G023800	SoyC13_01G025300	SoyC14_01G025100
SoyW01_01G025600	SoyW02_01G024500	SoyW03_01G025000	SoyL01_01G023500	.	SoyL03_01G023900	SoyL04_01G025200	SoyL05_01G023600	SoyL06_01G024200	SoyL07_01G025400	SoyL08_01G025300	SoyL09_01G025200	SoyC01_01G024900	SoyC02_01G023600	SoyC03_01G024900	SoyC04_01G025100	SoyC05_01G025500	SoyC06_01G024200	SoyC07_01G023700	SoyC08_01G023600	SoyC09_01G024800	SoyC10_01G024500	SoyC11_01G024200	SoyC12_01G023900	SoyC13_01G025400	SoyC14_01G025200
SoyW01_01G025700	SoyW02_01G024600	SoyW03_01G025100	SoyL01_01G023600	SoyL02_01G023900	SoyL03_01G024000	SoyL04_01G025300	SoyL05_01G023700	SoyL06_01G024300	SoyL07_01G025500	SoyL08_01G025400	SoyL09_01G025300	SoyC01_01G025000	SoyC02_01G023700	SoyC03_01G025000	SoyC04_01G025200	SoyC05_01G025600	SoyC06_01G024300	SoyC07_01G023800	SoyC08_01G023700	SoyC09_01G024900	SoyC10_01G024600	SoyC11_01G024300	SoyC12_01G024000	SoyC13_01G025500	SoyC14_01G025300
SoyW01_01G025800	SoyW02_01G024700	SoyW03_01G025200	SoyL01_01G023700	SoyL02_01G024000	SoyL03_01G024100	SoyL04_01G025400	SoyL05_01G023800	SoyL06_01G024400	SoyL07_01G025600	SoyL08_01G025500	SoyL09_01G025400	SoyC01_01G025100	SoyC02_01G023800	SoyC03_01G025100	SoyC04_01G025400	SoyC05_01G025700	SoyC06_01G024400	SoyC07_01G023900	SoyC08_01G023800	SoyC09_01G025000	SoyC10_01G024700	SoyC11_01G024400	SoyC12_01G024100	SoyC13_01G025600	SoyC14_01G025400
SoyW01_01G025900	SoyW02_01G024800	SoyW03_01G025300	SoyL01_01G023800	SoyL02_01G024100	SoyL03_01G024200	SoyL04_01G025500	SoyL05_01G023900	SoyL06_01G024500	SoyL07_01G025700	SoyL08_01G025600	SoyL09_01G025500	SoyC01_01G025200	SoyC02_01G023900	SoyC03_01G025200	SoyC04_01G025500	SoyC05_01G025800	SoyC06_01G024500	SoyC07_01G024000	SoyC08_01G023900	SoyC09_01G025100	SoyC10_01G024800	SoyC11_01G024500	SoyC12_01G024200	SoyC13_01G025700	SoyC14_01G025500
SoyW01_01G026000	SoyW02_01G024100	SoyW03_01G024500	SoyL01_01G023000	SoyL02_01G023400	SoyL03_01G023400	SoyL04_01G024700	SoyL05_01G023100	SoyL06_01G023700	SoyL07_01G024900	SoyL08_01G024800	SoyL09_01G024700	SoyC01_01G024400	SoyC02_01G023100	SoyC03_01G024400	SoyC04_01G024600	SoyC05_01G025000	SoyC06_01G023700	SoyC07_01G023200	SoyC08_01G023100	SoyC09_01G024300	SoyC10_01G024000	SoyC11_01G023700	SoyC12_01G023400	SoyC13_01G024800	SoyC14_01G024600
SoyW01_01G026100	SoyW02_01G025000	SoyW03_01G025500	SoyL01_01G024000	.	SoyL03_01G024400	SoyL04_01G025700	.	SoyL06_01G024700	SoyL07_01G025900	SoyL08_01G025800	SoyL09_01G025700	SoyC01_01G025400	SoyC02_01G024100	SoyC03_01G025400	SoyC04_01G025700	SoyC05_01G026000	SoyC06_01G024700	SoyC07_01G024200	SoyC08_01G024100	SoyC09_01G025300	.	SoyC11_01G024700	.	SoyC13_01G025900	.
SoyW01_01G026200	SoyW02_01G025100	SoyW03_01G025600	SoyL01_01G024100	SoyL02_01G024300	SoyL03_01G024500	SoyL04_01G025800	SoyL05_01G024100	SoyL06_01G024800	SoyL07_01G026000	SoyL08_01G025900	SoyL09_01G025800	.	SoyC02_01G024200	SoyC03_01G025500	SoyC04_01G025800	SoyC05_01G026100	.	SoyC07_01G024300	SoyC08_01G024200	SoyC09_01G025400	SoyC10_01G025000	SoyC11_01G024800	SoyC12_01G024400	SoyC13_01G026000	SoyC14_01G025700
SoyW01_01G026300	SoyW02_01G025200	SoyW03_01G025700	SoyL01_01G024200	.	SoyL03_01G024600	SoyL04_01G025900	.	SoyL06_01G024900	SoyL07_01G026100	SoyL08_01G026000	SoyL09_01G025900	.	SoyC02_01G024300	SoyC03_01G025600	.	SoyC05_01G026200	.	SoyC07_01G024400	SoyC08_01G024300	SoyC09_01G025500	.	SoyC11_01G024900	SoyC12_01G024500	SoyC13_01G026100	.
SoyW01_01G026400	SoyW02_01G025300	SoyW03_01G025800	SoyL01_01G024300	SoyL02_01G024400	SoyL03_01G024700	SoyL04_01G026000	SoyL05_01G024200	SoyL06_01G025000	SoyL07_01G026200	SoyL08_01G026100	SoyL09_01G026000	SoyC01_01G025500	SoyC02_01G024400	SoyC03_01G025700	SoyC04_01G025900	SoyC05_01G026300	SoyC06_01G024800	SoyC07_01G024500	SoyC08_01G024400	SoyC09_01G025600	SoyC10_01G025100	SoyC11_01G025000	SoyC12_01G024600	SoyC13_01G026200	SoyC14_01G025800
SoyW01_01G026500	.	.	.	.	.	.	.	.	.	SoyL08_01G026200	SoyL09_01G026100	.	.	SoyC03_01G025800	.	.	.	.	.	.	.	.	SoyC12_01G024700	SoyC13_01G026300	.
SoyW01_01G026600	SoyW02_01G025400	SoyW03_01G025900	SoyL01_01G024400	SoyL02_01G024500	SoyL03_01G024800	SoyL04_01G026100	SoyL05_01G024300	SoyL06_01G025100	SoyL07_01G026300	SoyL08_01G026300	SoyL09_01G026200	SoyC01_01G025600	SoyC02_01G024500	SoyC03_01G026000	SoyC04_01G025950	SoyC05_01G026400	SoyC06_01G024900	SoyC07_01G024600	SoyC08_01G024500	SoyC09_01G025700	SoyC10_01G025200	SoyC11_01G025100	SoyC12_01G024800	SoyC13_01G026400	SoyC14_01G025900
SoyW01_01G026700	SoyW02_01G025500	SoyW03_01G026000	SoyL01_01G024500	SoyL02_01G024600	SoyL03_01G024900	SoyL04_01G026200	SoyL05_01G024400	SoyL06_01G025200	SoyL07_01G026400	SoyL08_01G026400	SoyL09_01G026300	SoyC01_01G025700	SoyC02_01G024600	SoyC03_01G026100	SoyC04_01G026000	SoyC05_01G026500	SoyC06_01G025000	SoyC07_01G024700	SoyC08_01G024600	SoyC09_01G025800	SoyC10_01G025300	SoyC11_01G025200	SoyC12_01G024900	SoyC13_01G026500	SoyC14_01G026000
SoyW01_01G026800	SoyW02_01G025600	SoyW03_01G026100	SoyL01_01G024600	SoyL02_01G024700	SoyL03_01G025000	SoyL04_01G026300	SoyL05_01G024500	SoyL06_01G025300	SoyL07_01G026500	SoyL08_01G026500	SoyL09_01G026400	SoyC01_01G025800	SoyC02_01G024700	SoyC03_01G026200	SoyC04_01G026100	SoyC05_01G026600	SoyC06_01G025100	SoyC07_01G024800	SoyC08_01G024700	SoyC09_01G025900	SoyC10_01G025400	SoyC11_01G025300	SoyC12_01G025000	SoyC13_01G026600	SoyC14_01G026100
SoyW01_01G026900	SoyW02_01G025700	SoyW03_01G026200	SoyL01_01G024700	SoyL02_01G024800	SoyL03_01G025100	SoyL04_01G026400	SoyL05_01G024600	SoyL06_01G025400	SoyL07_01G026600	SoyL08_01G026600	SoyL09_01G026500	SoyC01_01G025900	SoyC02_01G024800	SoyC03_01G026300	SoyC04_01G026200	SoyC05_01G026700	SoyC06_01G025200	SoyC07_01G024900	SoyC08_01G024800	SoyC09_01G026000	SoyC10_01G025500	SoyC11_01G025400	SoyC12_01G025100	SoyC13_01G026700	SoyC14_01G026200
SoyW01_01G027000	SoyW02_01G025800	SoyW03_01G026350	SoyL01_01G024750	SoyL02_01G024950	SoyL03_01G025150	SoyL04_01G026500	SoyL05_01G024800	SoyL06_01G025450	SoyL07_01G026700	SoyL08_01G026700	SoyL09_01G026600	SoyC01_01G026050	SoyC02_01G024850	SoyC03_01G026450	SoyC04_01G026250	SoyC05_01G026800	SoyC06_01G025250	SoyC07_01G024950	SoyC08_01G024850	SoyC09_01G026050	SoyC10_01G025650	SoyC11_01G025450	SoyC12_01G025200	SoyC13_01G026800	SoyC14_01G026350
SoyW01_01G027100	SoyW02_01G025900	SoyW03_01G026400	SoyL01_01G024800	SoyL02_01G025000	SoyL03_01G025200	SoyL04_01G026600	SoyL05_01G024900	SoyL06_01G025500	SoyL07_01G026800	SoyL08_01G026800	SoyL09_01G026700	SoyC01_01G026100	SoyC02_01G024900	SoyC03_01G026500	SoyC04_01G026300	SoyC05_01G026900	SoyC06_01G025300	SoyC07_01G025000	SoyC08_01G024900	SoyC09_01G026100	SoyC10_01G025700	SoyC11_01G025500	SoyC12_01G025300	SoyC13_01G026900	SoyC14_01G026400
SoyW01_01G027200	SoyW02_01G026000	SoyW03_01G026500	SoyL01_01G024900	SoyL02_01G025100	SoyL03_01G025300	SoyL04_01G026700	SoyL05_01G025000	SoyL06_01G025600	SoyL07_01G026900	SoyL08_01G026900	SoyL09_01G026800	SoyC01_01G026200	SoyC02_01G025000	SoyC03_01G026600	SoyC04_01G026450	SoyC05_01G027000	SoyC06_01G025400	SoyC07_01G025100	SoyC08_01G025000	SoyC09_01G026200	SoyC10_01G025800	SoyC11_01G025600	SoyC12_01G025400	SoyC13_01G027000	SoyC14_01G026500
SoyW01_01G027300	SoyW02_01G026100	SoyW03_01G026600	SoyL01_01G025000	SoyL02_01G025200	SoyL03_01G025400	SoyL04_01G026800	SoyL05_01G025100	SoyL06_01G025700	SoyL07_01G027000	SoyL08_01G027000	SoyL09_01G026900	SoyC01_01G026300	SoyC02_01G025100	SoyC03_01G026700	SoyC04_01G026600	SoyC05_01G027100	SoyC06_01G025500	SoyC07_01G025200	SoyC08_01G025100	SoyC09_01G026300	SoyC10_01G025900	SoyC11_01G025700	SoyC12_01G025500	SoyC13_01G027100	SoyC14_01G026600
SoyW01_01G027400	SoyW02_01G026200	SoyW03_01G026700	SoyL01_01G025100	SoyL02_01G025300	SoyL03_01G025500	SoyL04_01G026900	SoyL05_01G025200	SoyL06_01G025800	SoyL07_01G027100	SoyL08_01G027100	SoyL09_01G027000	SoyC01_01G026400	SoyC02_01G025200	SoyC03_01G026800	SoyC04_01G026700	SoyC05_01G027200	SoyC06_01G025600	SoyC07_01G025300	SoyC08_01G025200	SoyC09_01G026400	SoyC10_01G026000	SoyC11_01G025800	SoyC12_01G025600	SoyC13_01G027200	SoyC14_01G026700
SoyW01_01G027500	.	SoyW03_01G026900	SoyL01_01G025200	SoyL02_01G025400	SoyL03_01G025600	SoyL04_01G027100	SoyL05_01G025300	SoyL06_01G026000	SoyL07_01G027300	SoyL08_01G027300	SoyL09_01G027200	SoyC01_01G026500	SoyC02_01G025400	SoyC03_01G027000	SoyC04_01G026900	SoyC05_01G027300	SoyC06_01G025700	SoyC07_01G025400	SoyC08_01G025400	SoyC09_01G026500	SoyC10_01G026100	SoyC11_01G025900	SoyC12_01G025800	SoyC13_01G027300	SoyC14_01G026800
SoyW01_01G027600	SoyW02_01G026300	SoyW03_01G026800	.	.	.	SoyL04_01G027000	.	SoyL06_01G025900	SoyL07_01G027200	SoyL08_01G027200	SoyL09_01G027100	.	SoyC02_01G025300	SoyC03_01G026900	SoyC04_01G026800	.	.	.	SoyC08_01G025300	SoyC09_01G026450	.	SoyC11_01G025850	SoyC12_01G025700	.	.
SoyW01_01G027700	SoyW02_01G026400	SoyW03_01G027000	SoyL01_01G025300	SoyL02_01G025500	SoyL03_01G025700	SoyL04_01G027200	SoyL05_01G025400	SoyL06_01G026100	SoyL07_01G027400	SoyL08_01G027400	SoyL09_01G027300	SoyC01_01G026600	SoyC02_01G025500	SoyC03_01G027100	SoyC04_01G027000	SoyC05_01G027400	SoyC06_01G025800	SoyC07_01G025500	SoyC08_01G025500	SoyC09_01G026600	SoyC10_01G026200	SoyC11_01G026000	SoyC12_01G025900	SoyC13_01G027400	SoyC14_01G026900
SoyW01_01G027800	SoyW02_01G026500	SoyW03_01G027100	SoyL01_01G025400	SoyL02_01G025600	SoyL03_01G025800	SoyL04_01G027300	SoyL05_01G025500	SoyL06_01G026200	SoyL07_01G027500	SoyL08_01G027500	SoyL09_01G027400	SoyC01_01G026800	SoyC02_01G025600	SoyC03_01G027200	SoyC04_01G027100	SoyC05_01G027500	SoyC06_01G025900	SoyC07_01G025600	SoyC08_01G025600	SoyC09_01G026700	SoyC10_01G026300	SoyC11_01G026100	SoyC12_01G026000	SoyC13_01G027500	SoyC14_01G027000
SoyW01_01G027900	SoyW02_01G026600	SoyW03_01G027200	SoyL01_01G025500	SoyL02_01G025700	SoyL03_01G025900	SoyL04_01G027400	SoyL05_01G025600	SoyL06_01G026300	SoyL07_01G027600	SoyL08_01G027600	SoyL09_01G027500	SoyC01_01G026900	SoyC02_01G025700	SoyC03_01G027300	SoyC04_01G027200	SoyC05_01G027600	SoyC06_01G026000	SoyC07_01G025700	SoyC08_01G025700	SoyC09_01G026800	SoyC10_01G026400	SoyC11_01G026200	SoyC12_01G026100	SoyC13_01G027600	SoyC14_01G027100
SoyW01_01G028000	SoyW02_01G026700	SoyW03_01G027300	SoyL01_01G025600	SoyL02_01G025800	SoyL03_01G026000	SoyL04_01G027500	SoyL05_01G025700	SoyL06_01G026400	SoyL07_01G027700	SoyL08_01G027700	SoyL09_01G027600	SoyC01_01G027000	SoyC02_01G025800	SoyC03_01G027400	SoyC04_01G027300	SoyC05_01G027700	SoyC06_01G026100	SoyC07_01G025800	SoyC08_01G025800	SoyC09_01G026900	SoyC10_01G026500	SoyC11_01G026300	SoyC12_01G026200	SoyC13_01G027700	SoyC14_01G027200
SoyW01_01G028100	SoyW02_01G026900	SoyW03_01G027500	SoyL01_01G025800	SoyL02_01G026000	SoyL03_01G026200	SoyL04_01G027700	SoyL05_01G025900	SoyL06_01G026600	SoyL07_01G027900	SoyL08_01G027900	SoyL09_01G027800	SoyC01_01G027200	SoyC02_01G026000	SoyC03_01G027600	SoyC04_01G027500	SoyC05_01G027900	SoyC06_01G026300	SoyC07_01G026000	SoyC08_01G026000	SoyC09_01G027100	SoyC10_01G026700	SoyC11_01G026500	SoyC12_01G026400	SoyC13_01G027900	SoyC14_01G027400
SoyW01_01G028200	SoyW02_01G026800	SoyW03_01G027400	.	SoyL02_01G025900	SoyL03_01G026100	SoyL04_01G027600	SoyL05_01G025800	SoyL06_01G026500	SoyL07_01G027800	SoyL08_01G027800	SoyL09_01G027700	SoyC01_01G027100	.	SoyC03_01G027500	SoyC04_01G027400	.	SoyC06_01G026200	SoyC07_01G025900	.	SoyC09_01G027000	SoyC10_01G026600	SoyC11_01G026400	SoyC12_01G026300	SoyC13_01G027800	SoyC14_01G027300
SoyW01_01G028300	SoyW02_01G027000	SoyW03_01G027600	SoyL01_01G025900	SoyL02_01G026100	SoyL03_01G026300	SoyL04_01G027800	SoyL05_01G026000	SoyL06_01G026700	SoyL07_01G028000	SoyL08_01G028000	SoyL09_01G027900	SoyC01_01G027300	SoyC02_01G026100	SoyC03_01G027700	SoyC04_01G027600	SoyC05_01G028000	SoyC06_01G026400	SoyC07_01G026100	SoyC08_01G026100	SoyC09_01G027200	SoyC10_01G026800	SoyC11_01G026600	SoyC12_01G026500	SoyC13_01G028000	SoyC14_01G027500
SoyW01_01G028350	SoyW02_01G027050	SoyW03_01G027650	SoyL01_01G025950	SoyL02_01G026150	.	SoyL04_01G027830	SoyL05_01G026050	SoyL06_01G026750	SoyL07_01G028050	SoyL08_01G028050	SoyL09_01G027950	SoyC01_01G027350	SoyC02_01G026200	SoyC03_01G027750	SoyC04_01G027650	SoyC05_01G028050	SoyC06_01G026450	SoyC07_01G026150	SoyC08_01G026150	SoyC09_01G027250	SoyC10_01G026850	SoyC11_01G026650	SoyC12_01G026600	SoyC13_01G028050	SoyC14_01G027550
SoyW01_01G028400	SoyW02_01G027100	SoyW03_01G027700	SoyL01_01G026000	SoyL02_01G026200	SoyL03_01G026400	SoyL04_01G027870	SoyL05_01G026100	SoyL06_01G026800	SoyL07_01G028100	SoyL08_01G028100	SoyL09_01G028000	SoyC01_01G027400	SoyC02_01G026300	SoyC03_01G027800	SoyC04_01G027700	SoyC05_01G028100	SoyC06_01G026500	SoyC07_01G026200	SoyC08_01G026200	SoyC09_01G027300	SoyC10_01G026900	SoyC11_01G026700	.	SoyC13_01G028100	SoyC14_01G027600
SoyW01_01G028500	SoyW02_01G027200	SoyW03_01G027800	SoyL01_01G026100	SoyL02_01G026300	SoyL03_01G026500	SoyL04_01G027900	SoyL05_01G026200	SoyL06_01G026900	SoyL07_01G028200	SoyL08_01G028200	SoyL09_01G028100	SoyC01_01G027500	SoyC02_01G026400	SoyC03_01G027900	SoyC04_01G027800	SoyC05_01G028200	SoyC06_01G026600	SoyC07_01G026300	SoyC08_01G026300	SoyC09_01G027400	SoyC10_01G027000	SoyC11_01G026800	SoyC12_01G026700	SoyC13_01G028200	SoyC14_01G027700
SoyW01_01G028600	SoyW02_01G027250	SoyW03_01G028000	.	SoyL02_01G026370	SoyL03_01G026550	.	SoyL05_01G026250	SoyL06_01G026950	SoyL07_01G028400	SoyL08_01G028250	SoyL09_01G028200	SoyC01_01G027550	SoyC02_01G026450	SoyC03_01G028000	SoyC04_01G027850	SoyC05_01G028300	SoyC06_01G026650	.	.	SoyC09_01G027450	SoyC10_01G027050	SoyC11_01G026850	SoyC12_01G026750	SoyC13_01G028400	SoyC14_01G027750
SoyW01_01G028700	SoyW02_01G027300	SoyW03_01G028100	SoyL01_01G026200	SoyL02_01G026430	SoyL03_01G026600	SoyL04_01G028000	SoyL05_01G026300	.	SoyL07_01G028500	SoyL08_01G028300	SoyL09_01G028300	SoyC01_01G027600	SoyC02_01G026500	SoyC03_01G028100	SoyC04_01G027900	SoyC05_01G028400	SoyC06_01G026700	SoyC07_01G026400	SoyC08_01G026400	SoyC09_01G027500	SoyC10_01G027100	SoyC11_01G026900	SoyC12_01G026800	SoyC13_01G028500	SoyC14_01G027800
SoyW01_01G028800	SoyW02_01G027400	SoyW03_01G028200	SoyL01_01G026300	SoyL02_01G026500	SoyL03_01G026700	SoyL04_01G028200	SoyL05_01G026400	SoyL06_01G027000	SoyL07_01G028600	SoyL08_01G028400	SoyL09_01G028400	SoyC01_01G027700	SoyC02_01G026600	SoyC03_01G028200	SoyC04_01G028000	SoyC05_01G028500	SoyC06_01G026800	.	SoyC08_01G026500	SoyC09_01G027600	SoyC10_01G027200	SoyC11_01G027000	SoyC12_01G026900	SoyC13_01G028600	SoyC14_01G027900
[truncated: 128,721 more rows]

[truncated: 6 more sheets: Supplementary Table 11, Supplementary Table 12, Supplementary Table 13, Supplementary Table 14, Supplementary Table 15, Supplementary Table 16]
